# Supplementary material for: Benzothiazole and Chromone Derivatives as Potential ATR Kinase Inhibitors and Anticancer Agents
Source: MDPI journal article supplement (doi:10.3390/molecules27144637), 2022-07-20

# Benzothiazole and Chromone Derivatives as Potential ATR Kinase Inhibitors and Anticancer Agents

Mykhaylo Frasinyuk <sup>1,†</sup>, Chhabria Dimple <sup>2,†</sup>, Victor Kartsev <sup>3,‡</sup>, Dilip Haritha <sup>2,‡</sup>, Samvel Sirakanyan <sup>4</sup>, Sivapriya Kirubakaran <sup>2,\*</sup>, Anthi Petrou <sup>5</sup>, Athina Geronikaki <sup>5,\*</sup> and Domenico Spinelli <sup>6,\*</sup>

<sup>1</sup> V.P. Kukhar Institute of Bioorganic Chemistry and Petrochemistry, National Academy of Science of Ukraine, 02094 Kiev, Ukraine; mykhaylo.frasinyuk@ukr.net

<sup>2</sup> Discipline of Chemistry, Indian Institute of Technology Gandhinagar, Gandhinagar 382055, India; dimple.c@iitgn.ac.in (D.C.); d\_haritha@iitgn.ac.in (H.D.)

<sup>3</sup> InterBioScreen, 119019 Chernogolovka, Russia; vkartsev@ibscreen.chg.ru

<sup>4</sup> Scientific Technological Center of Organic and Pharmaceutical Chemistry, National Academy of Science of the Republic of Armenia, Institute of Fine Organic Chemistry, Yerevan 0014, Armenia; shnnr@mail.ru

<sup>5</sup> School of Pharmacy, Aristotle University of Thessaloniki, 54124 Thessaloniki, Greece; anthi.petrou.thessaloniki1@gmail.com

<sup>6</sup> Dipartimento di Chimica "G. Ciamician", Alma Mater Studiorum-Università di Bologna, 40126 Bologna, Italy

\* Correspondence: priyak@iitgn.ac.in (S.K.); geronik@pharm.auth.gr (A.G.); domenico.spinelli@unibo.it (D.S.)

† These authors contributed equally to this work.

‡ These authors contributed equally to this work.

## Supplementary Material

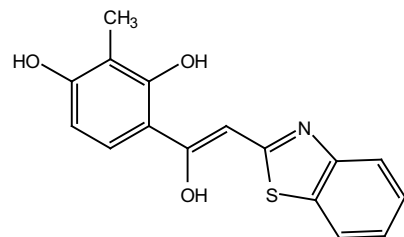

$^1\text{H}$  NMR spectrum of compound **1d** in  $\text{DMSO-d}_6$

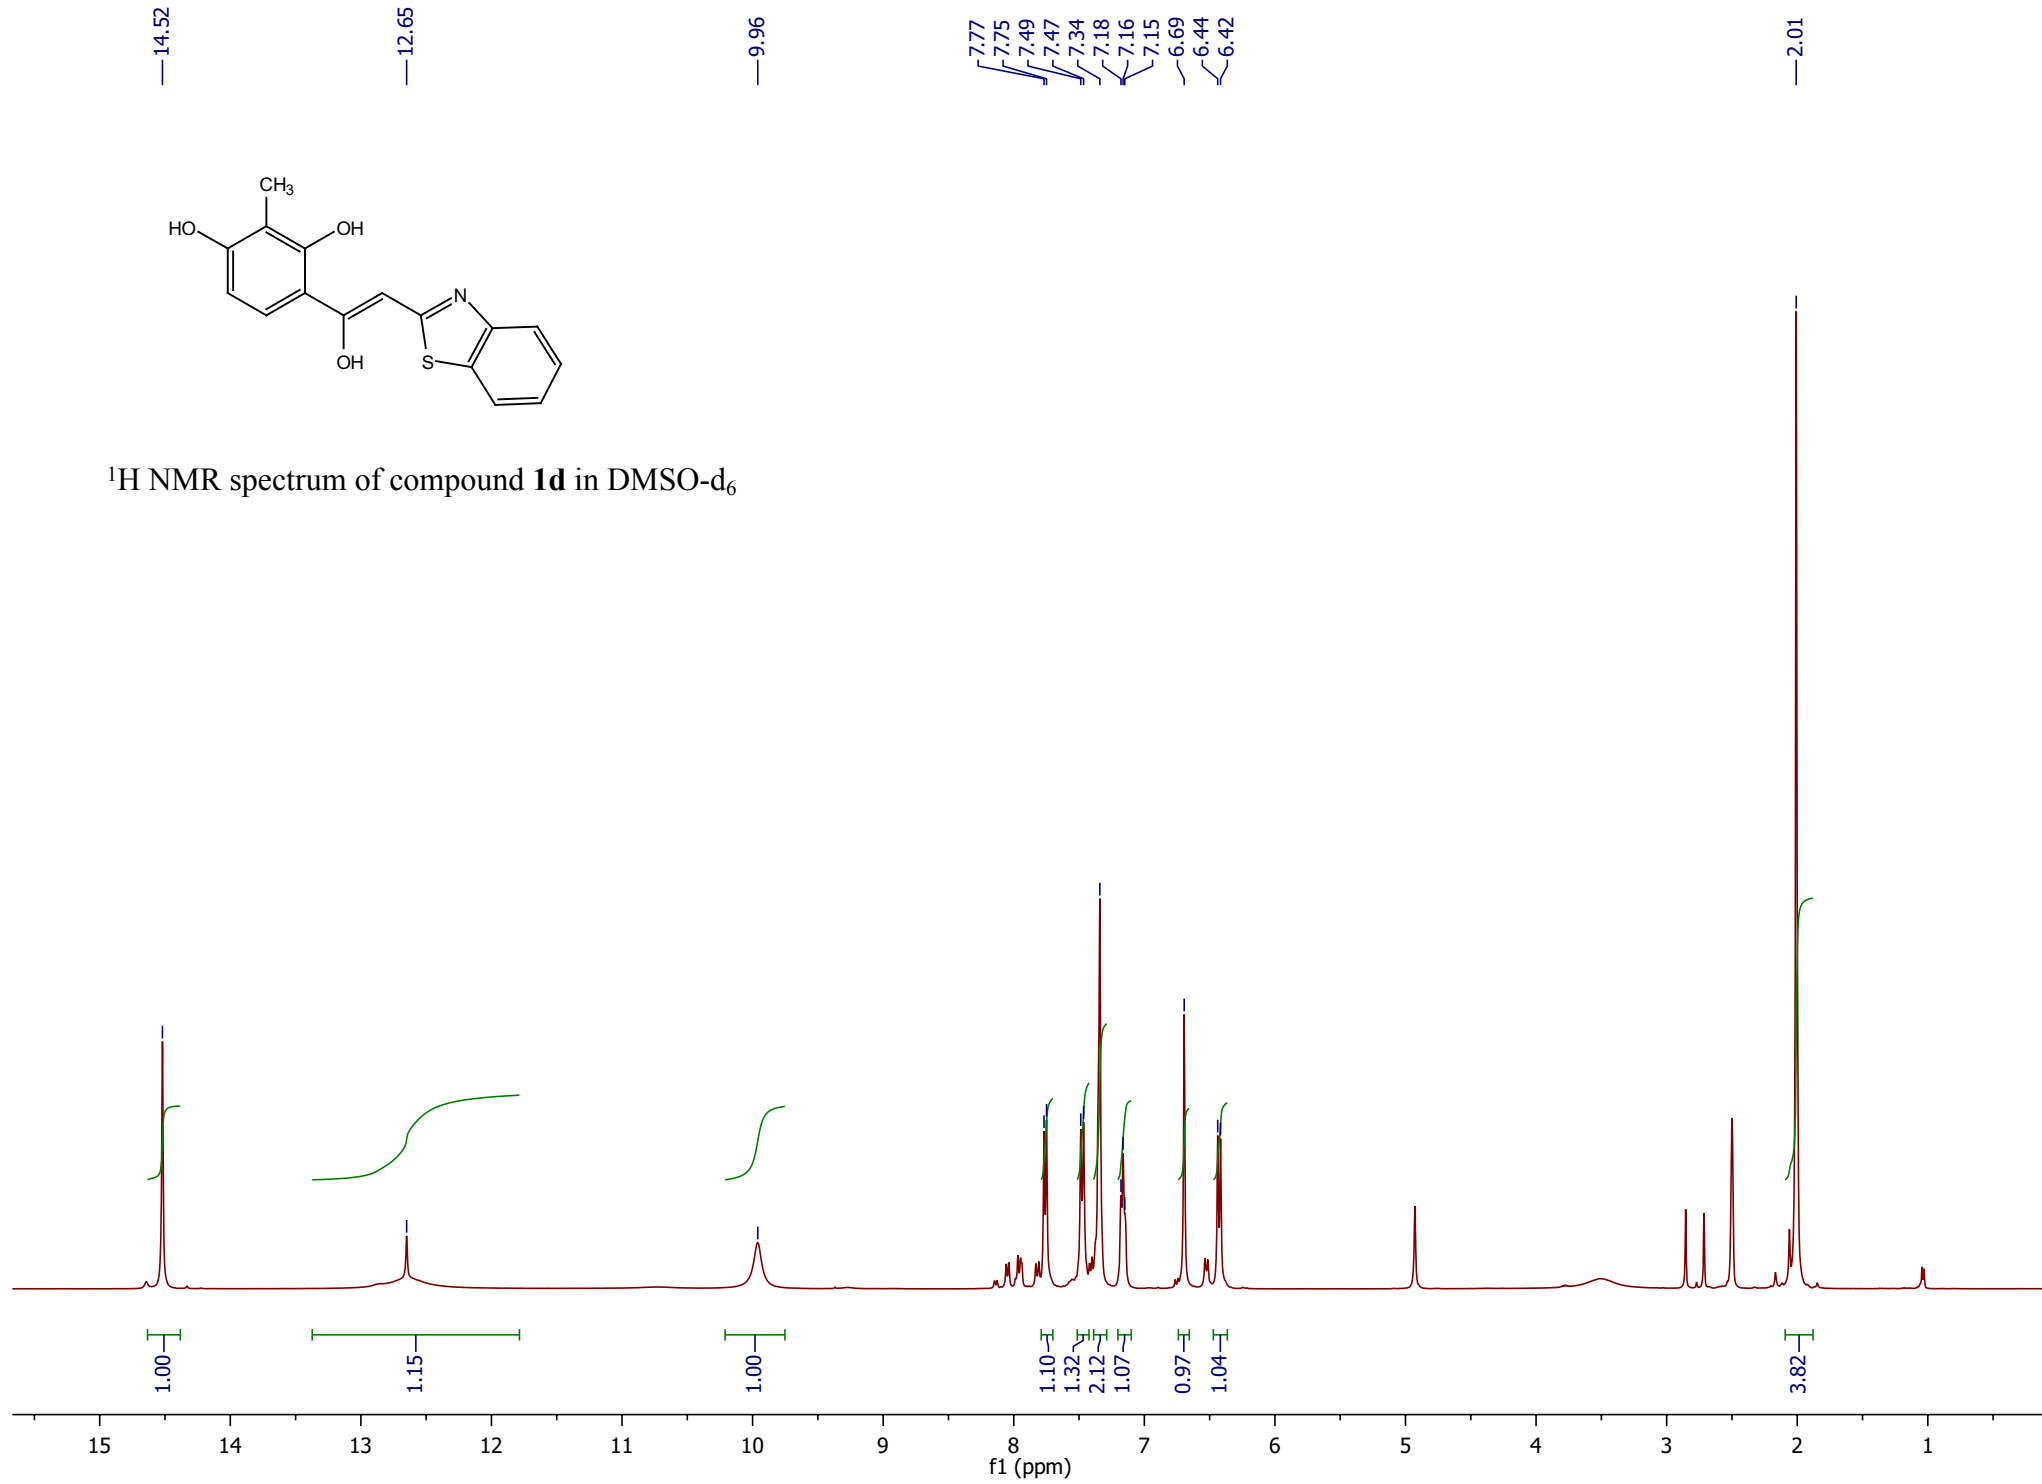



$^{13}\text{C}$  NMR spectrum of compound **1d** in DMSO- $\text{d}_6$

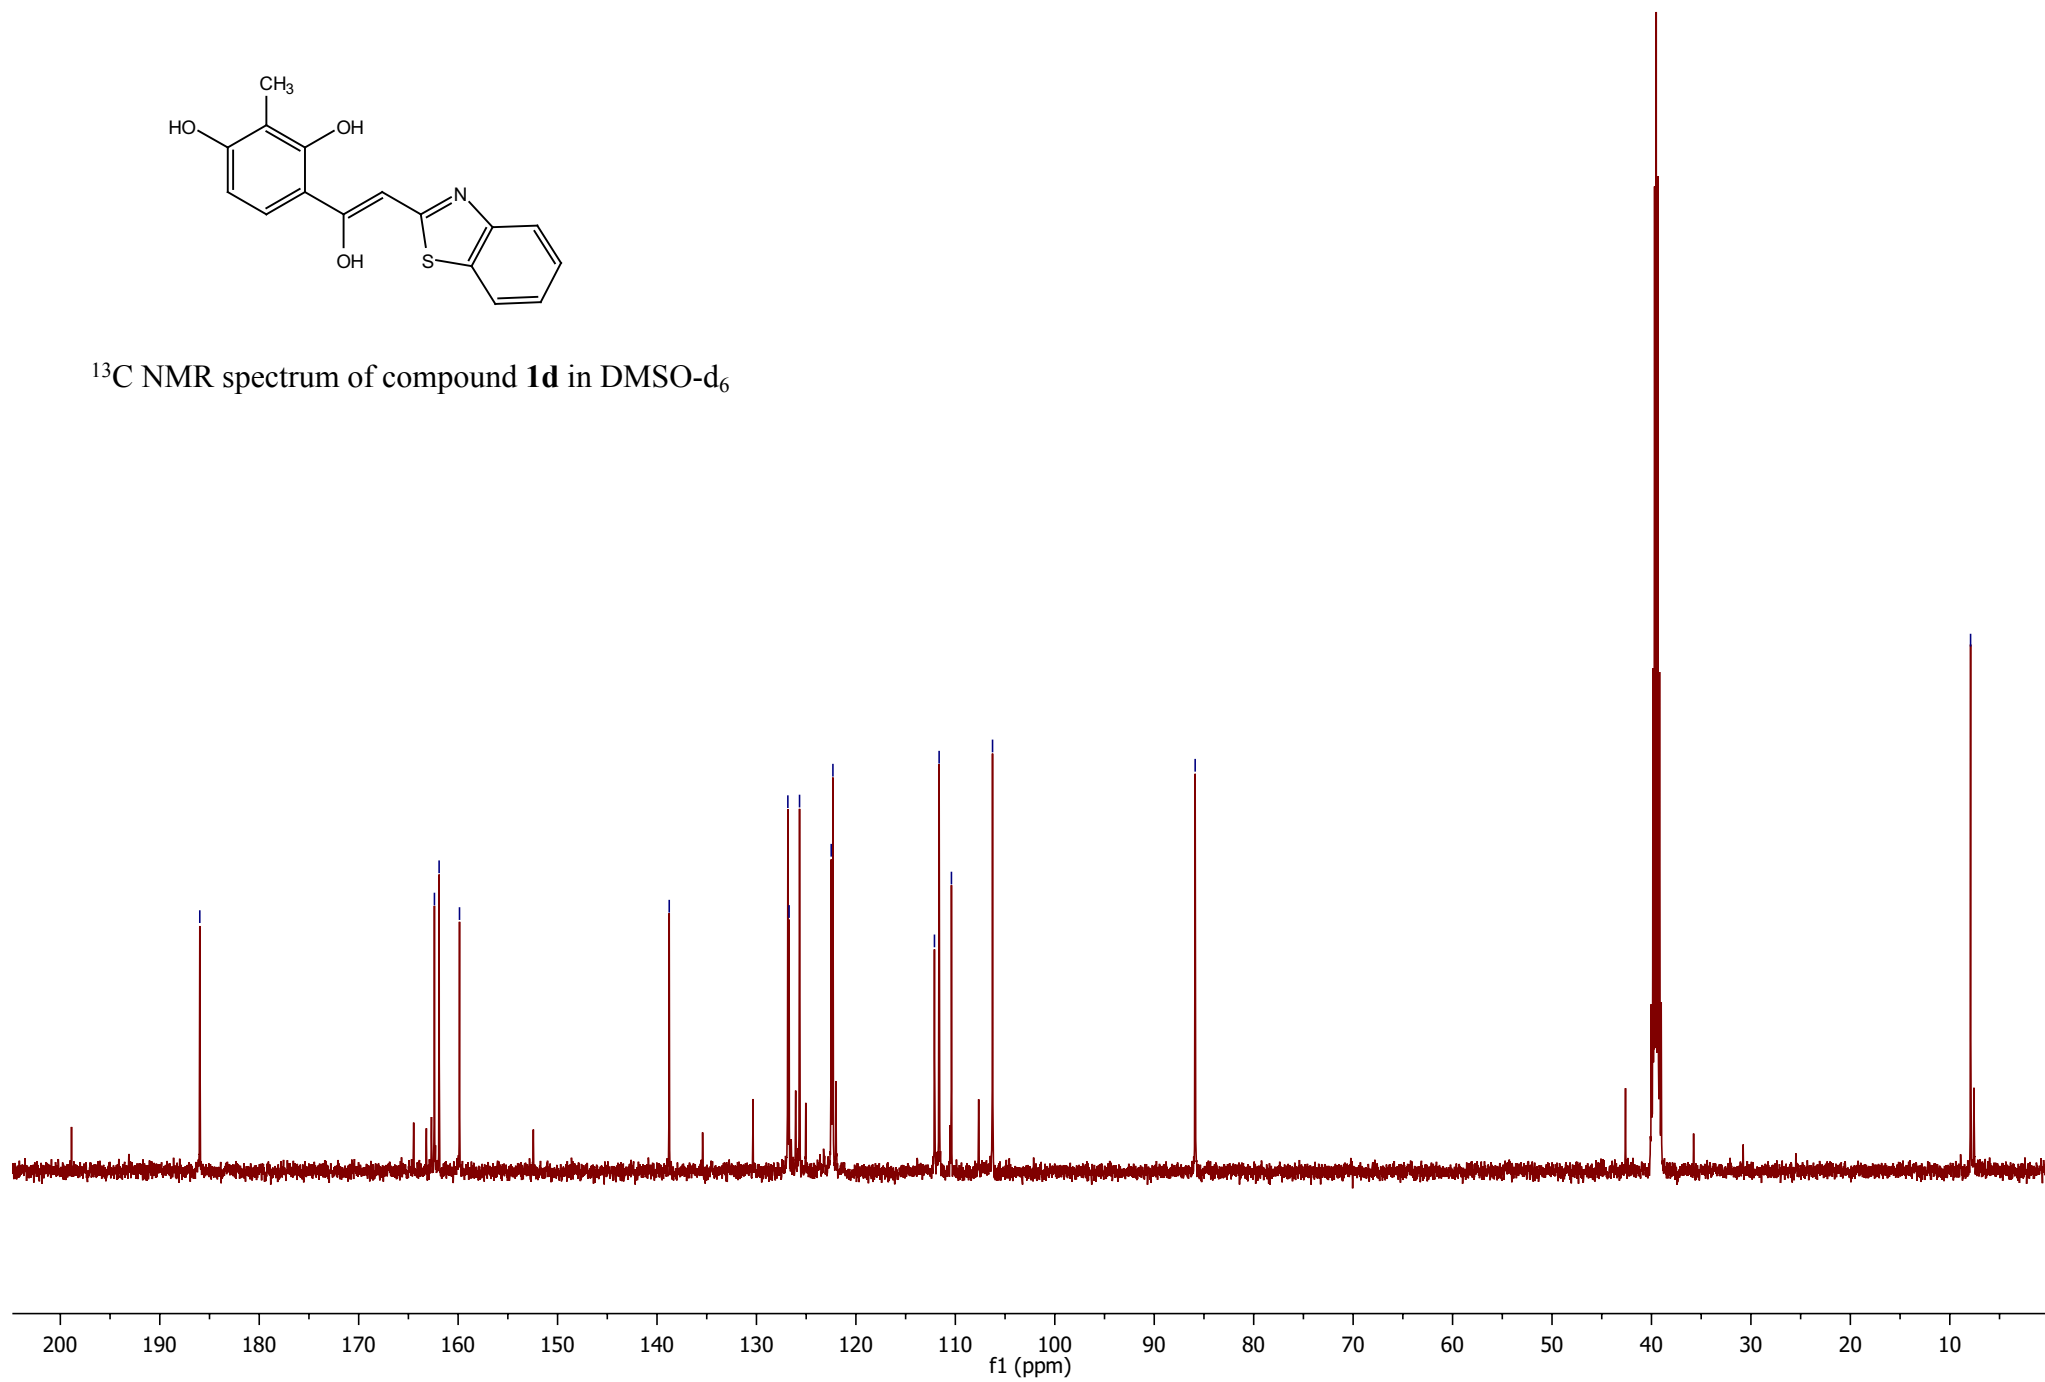

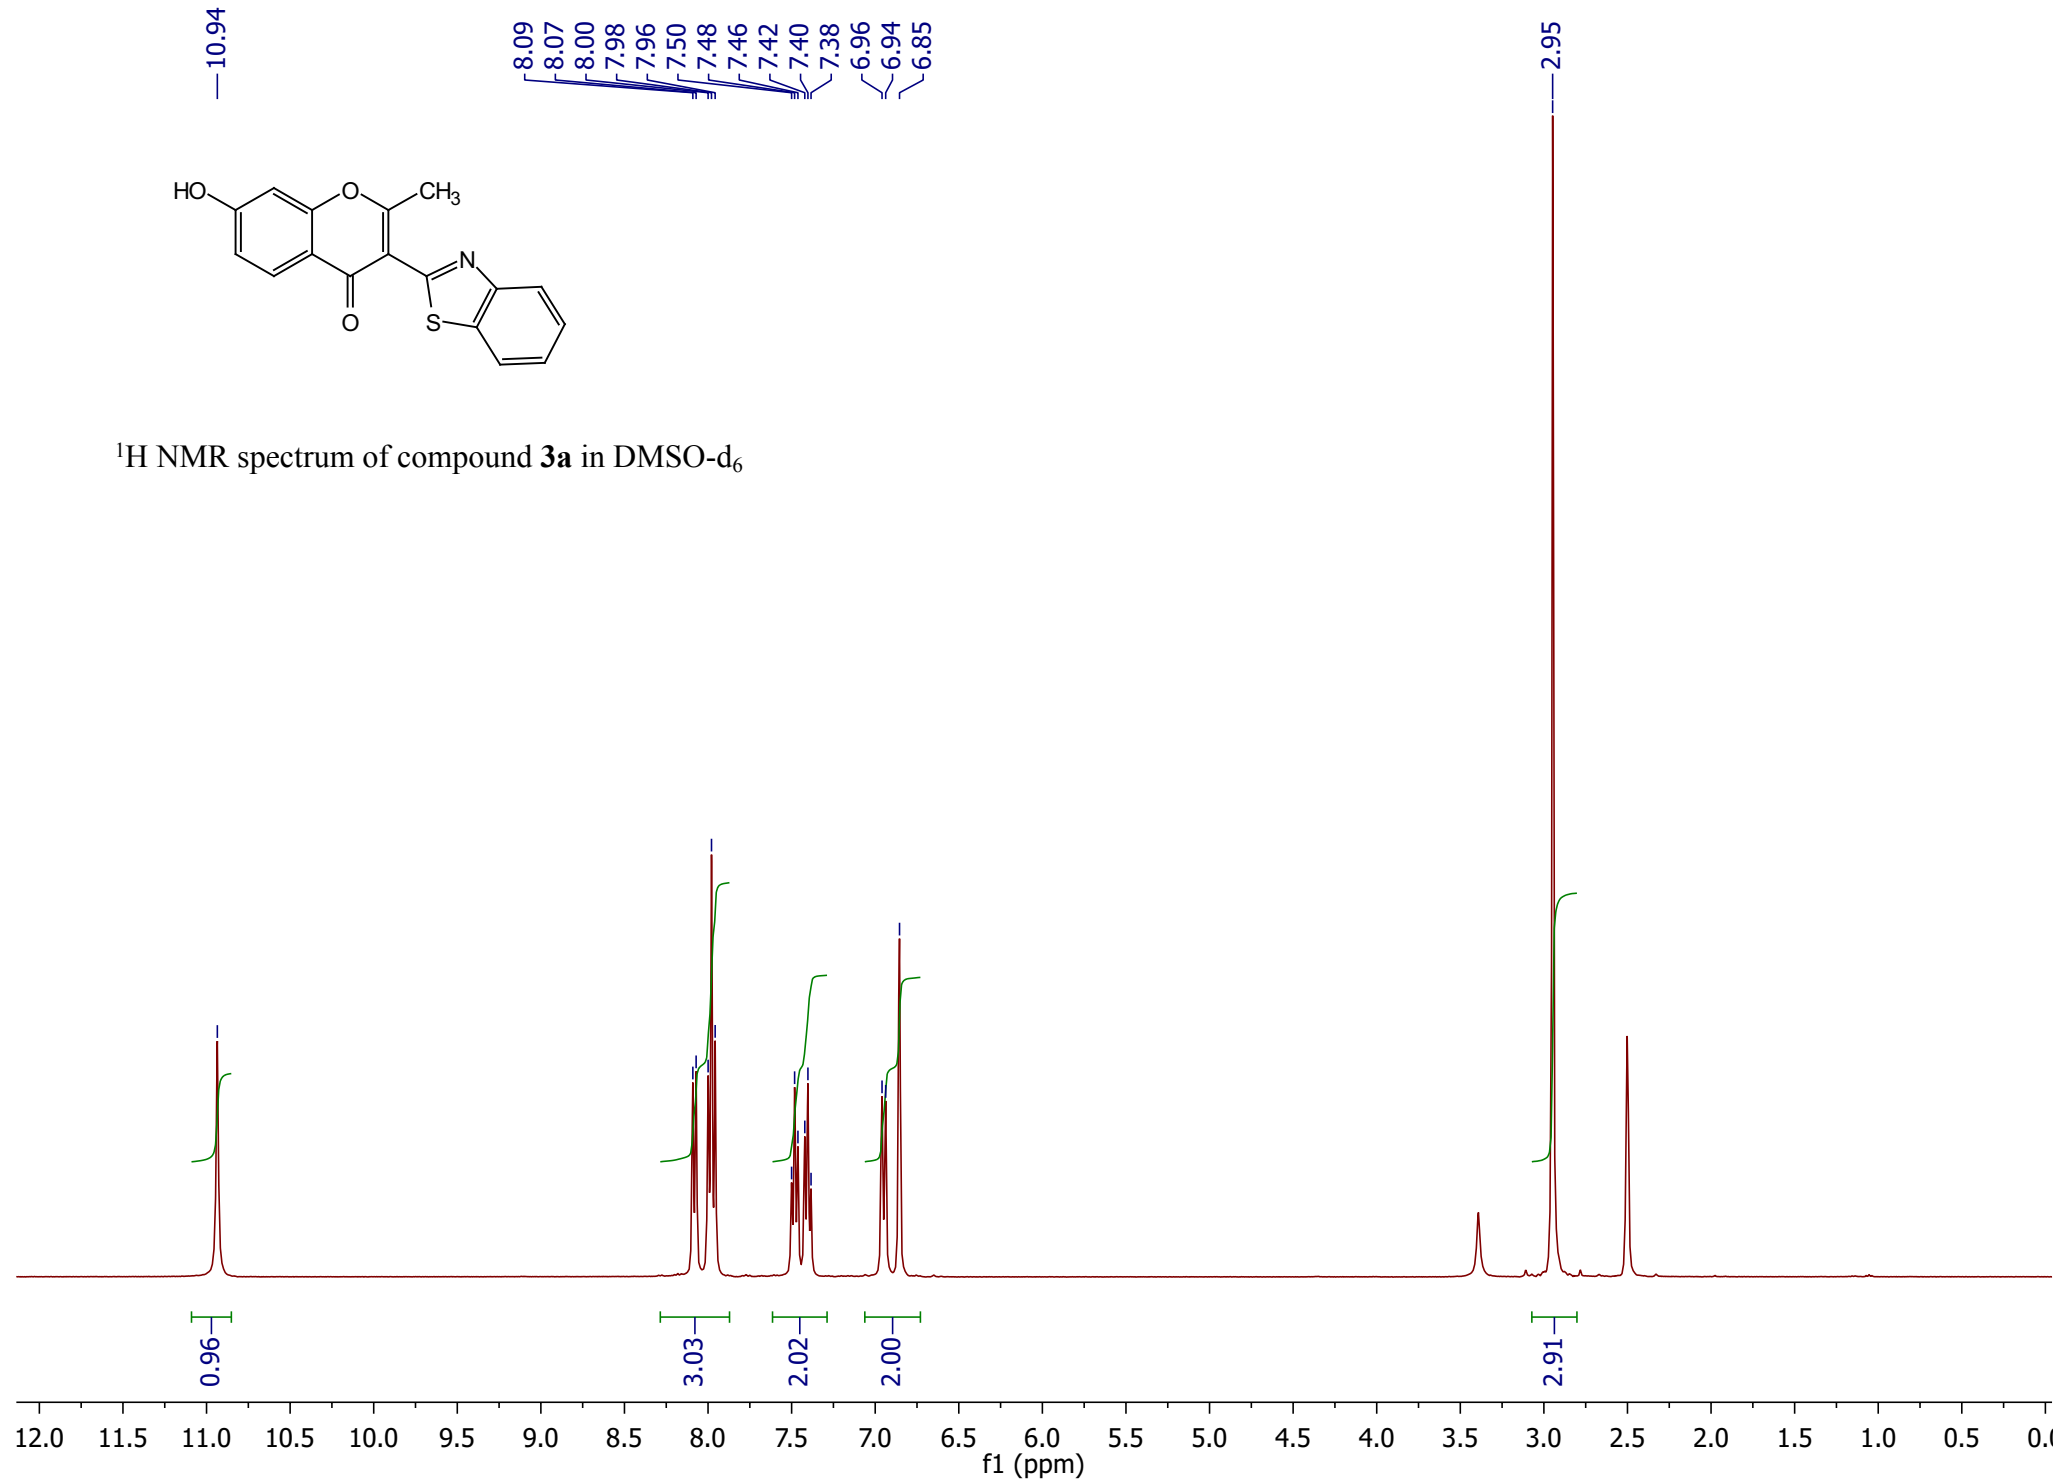

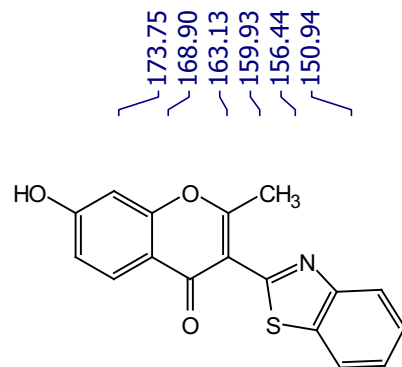

173.75  
168.90  
163.13  
159.93  
156.44  
150.94  
135.00  
127.14  
125.82  
124.81  
122.32  
121.42  
115.60  
114.48  
114.36  
101.98

21.68

$^{13}\text{C}$  NMR spectrum of compound **3a** in DMSO- $\text{d}_6$

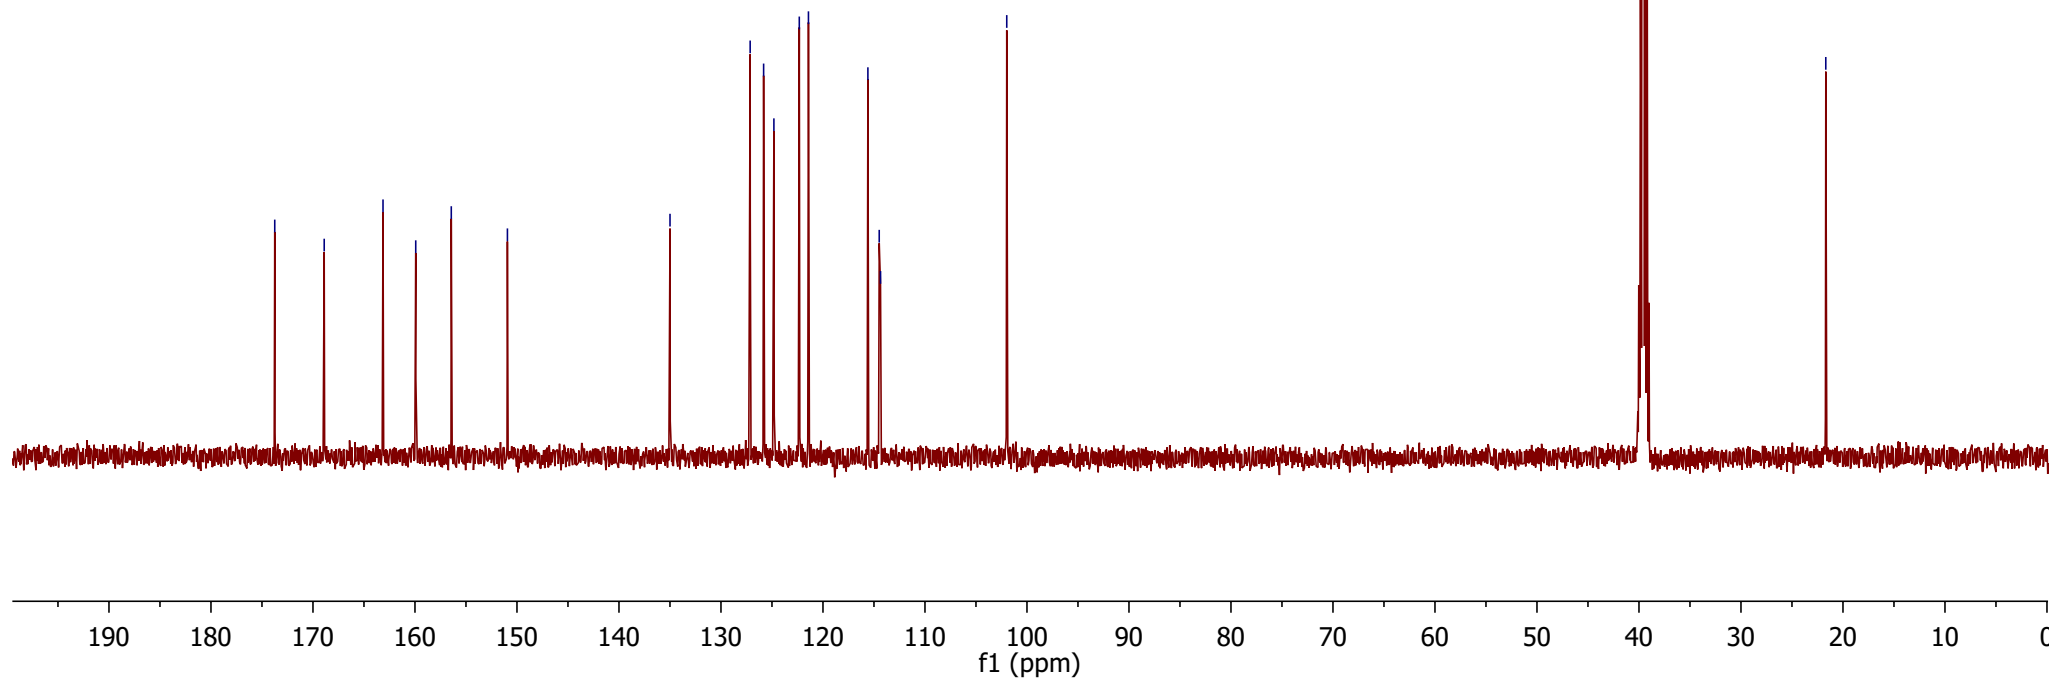

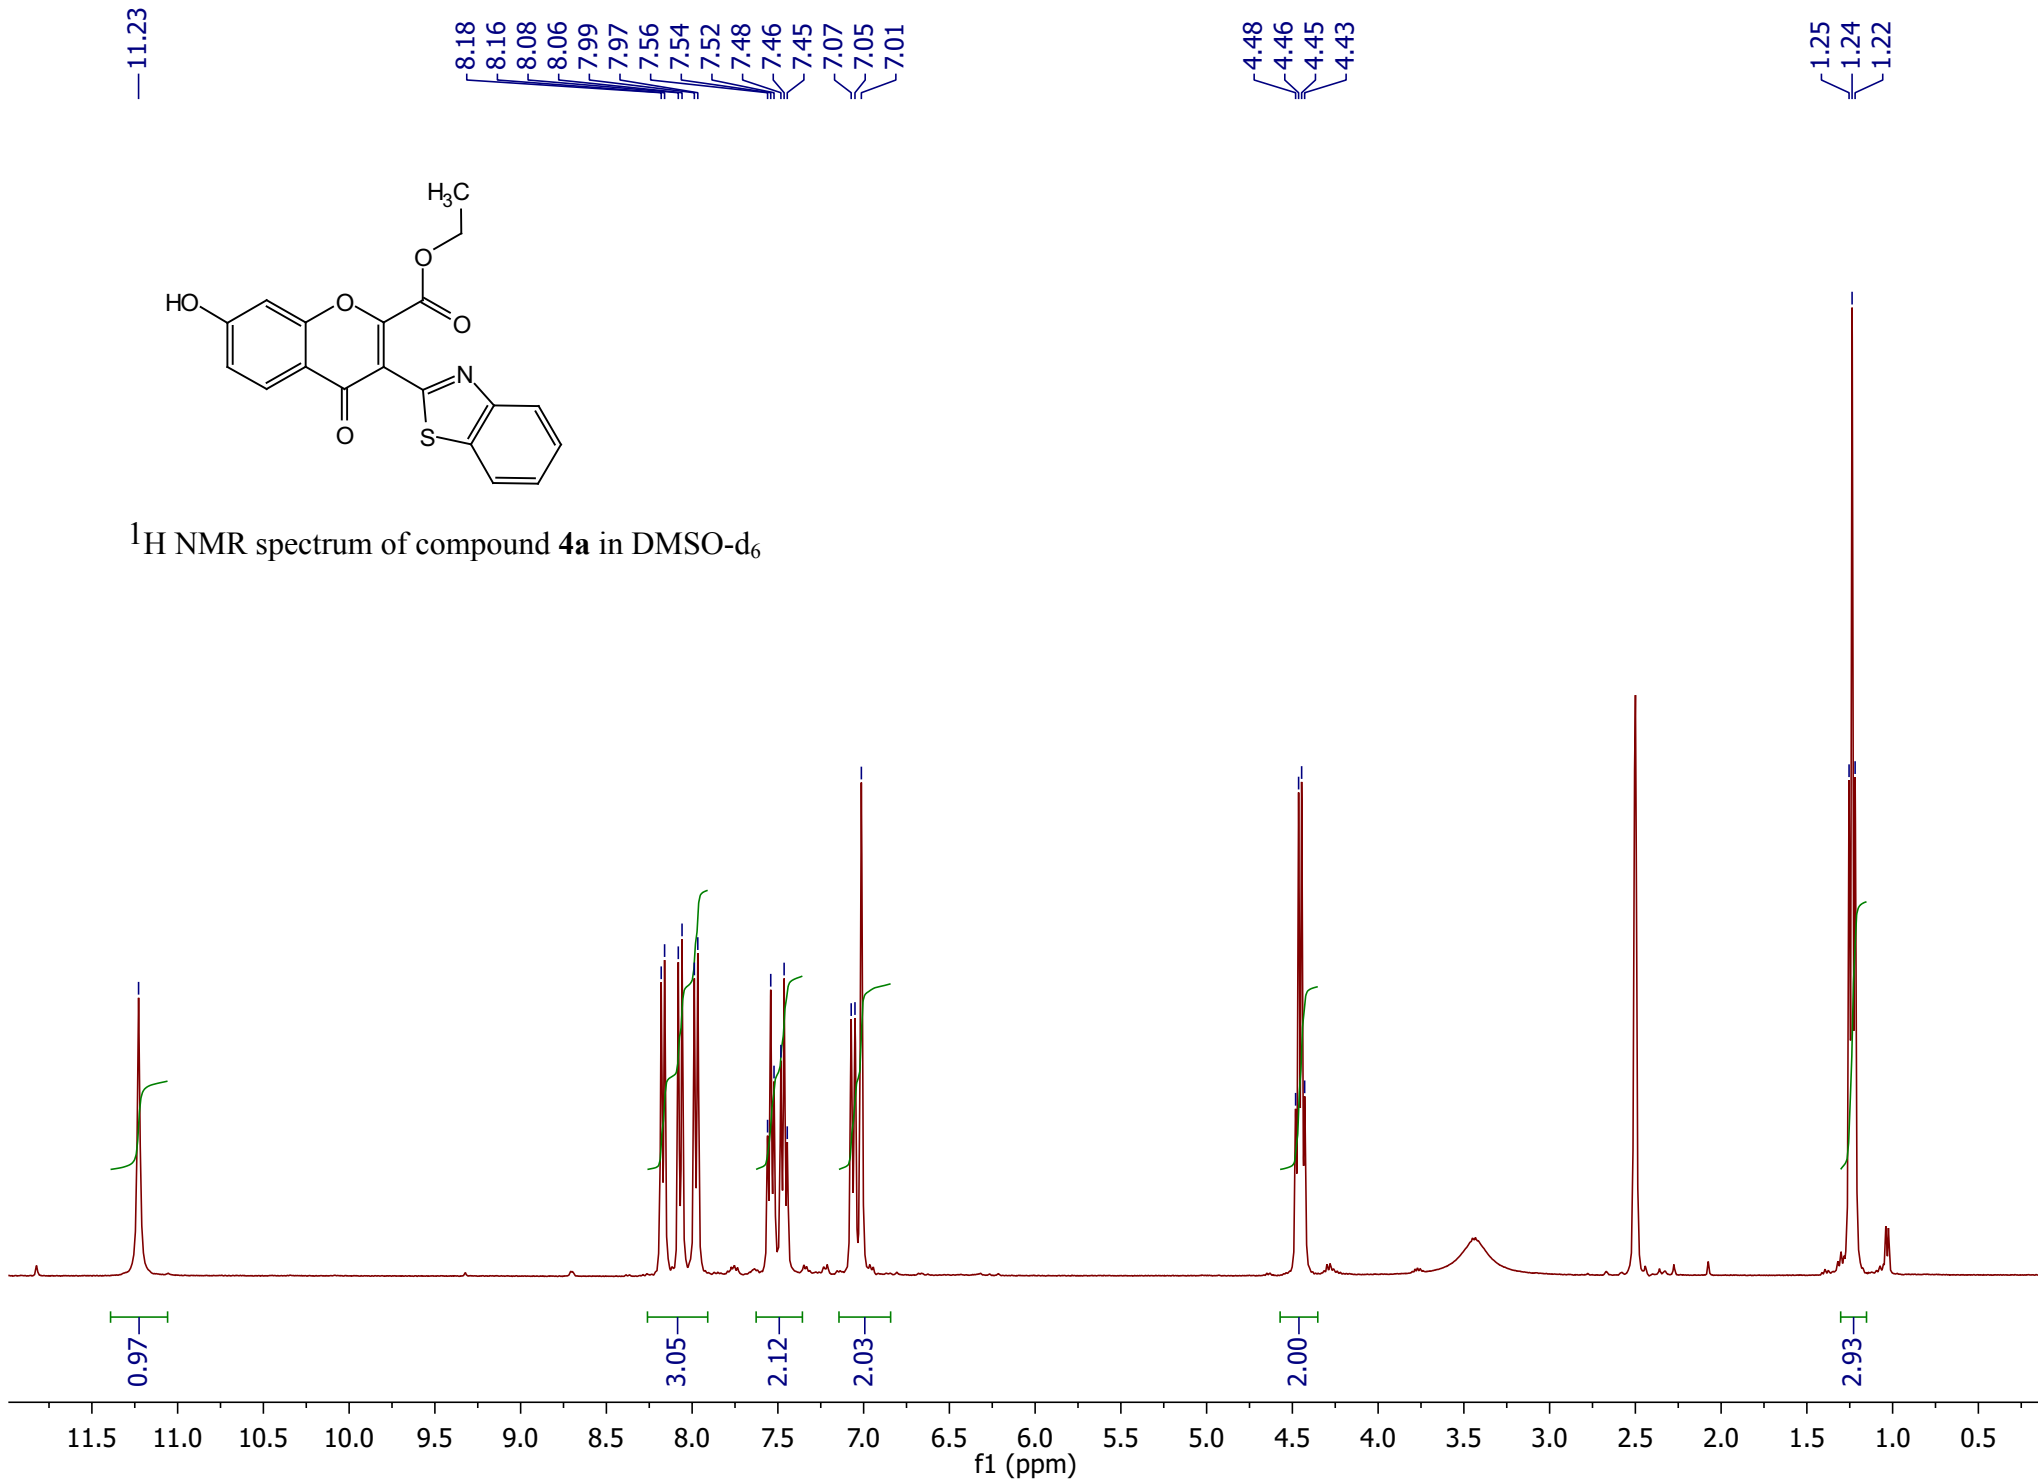

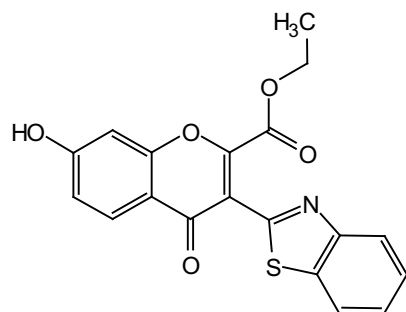

$^{13}\text{C}$  NMR spectrum of compound **4a** in DMSO- $\text{d}_6$

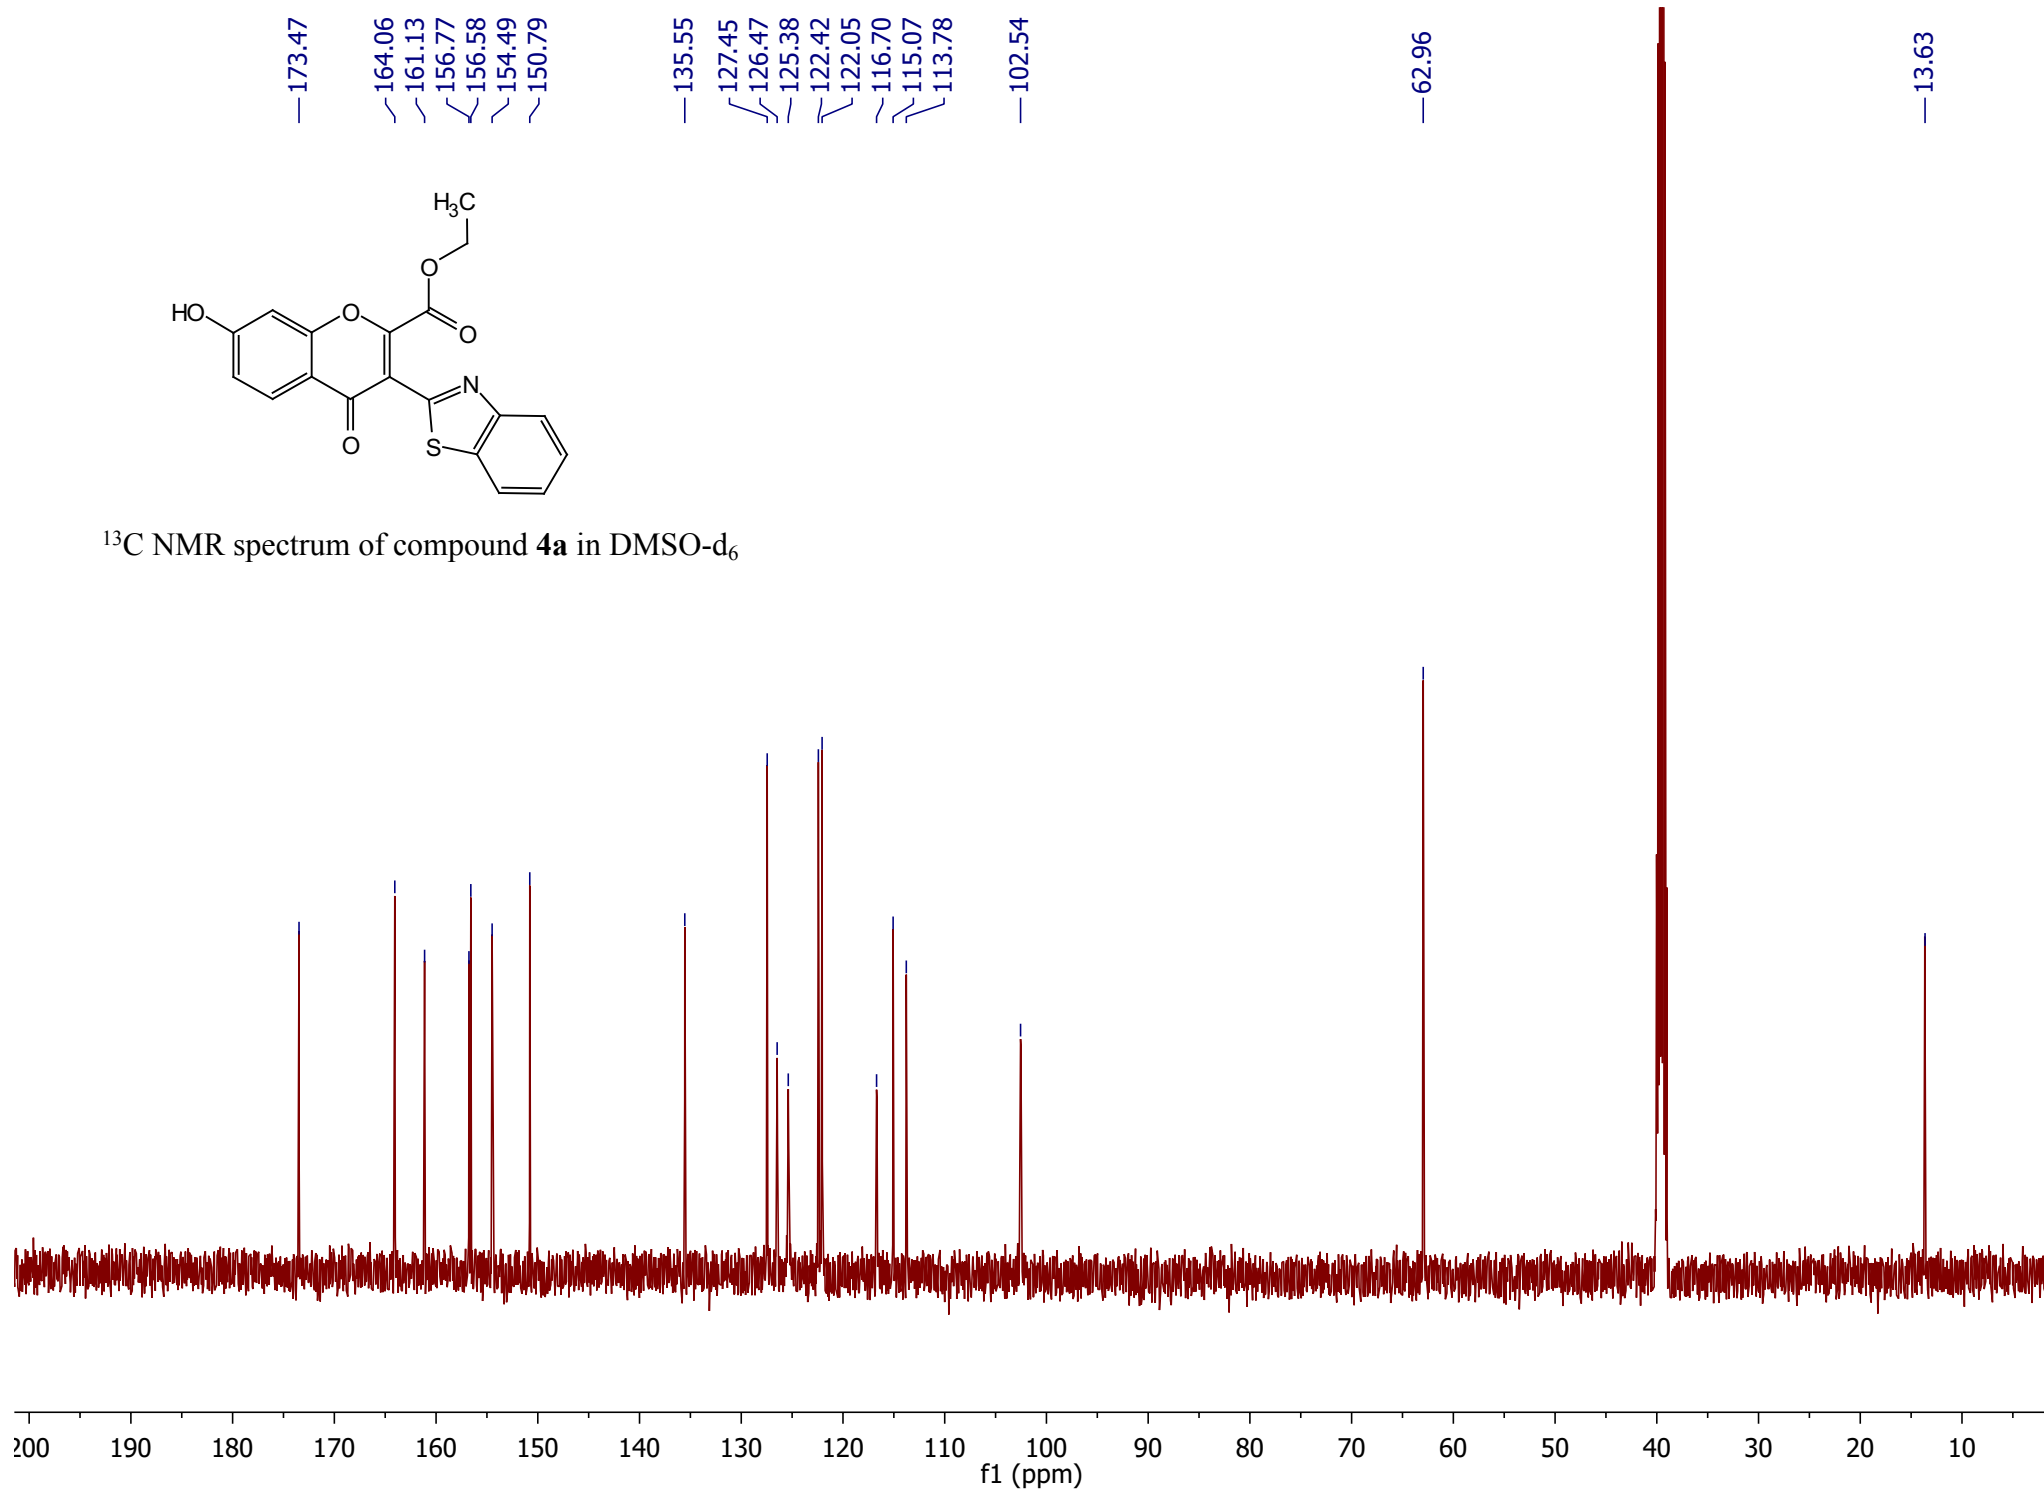

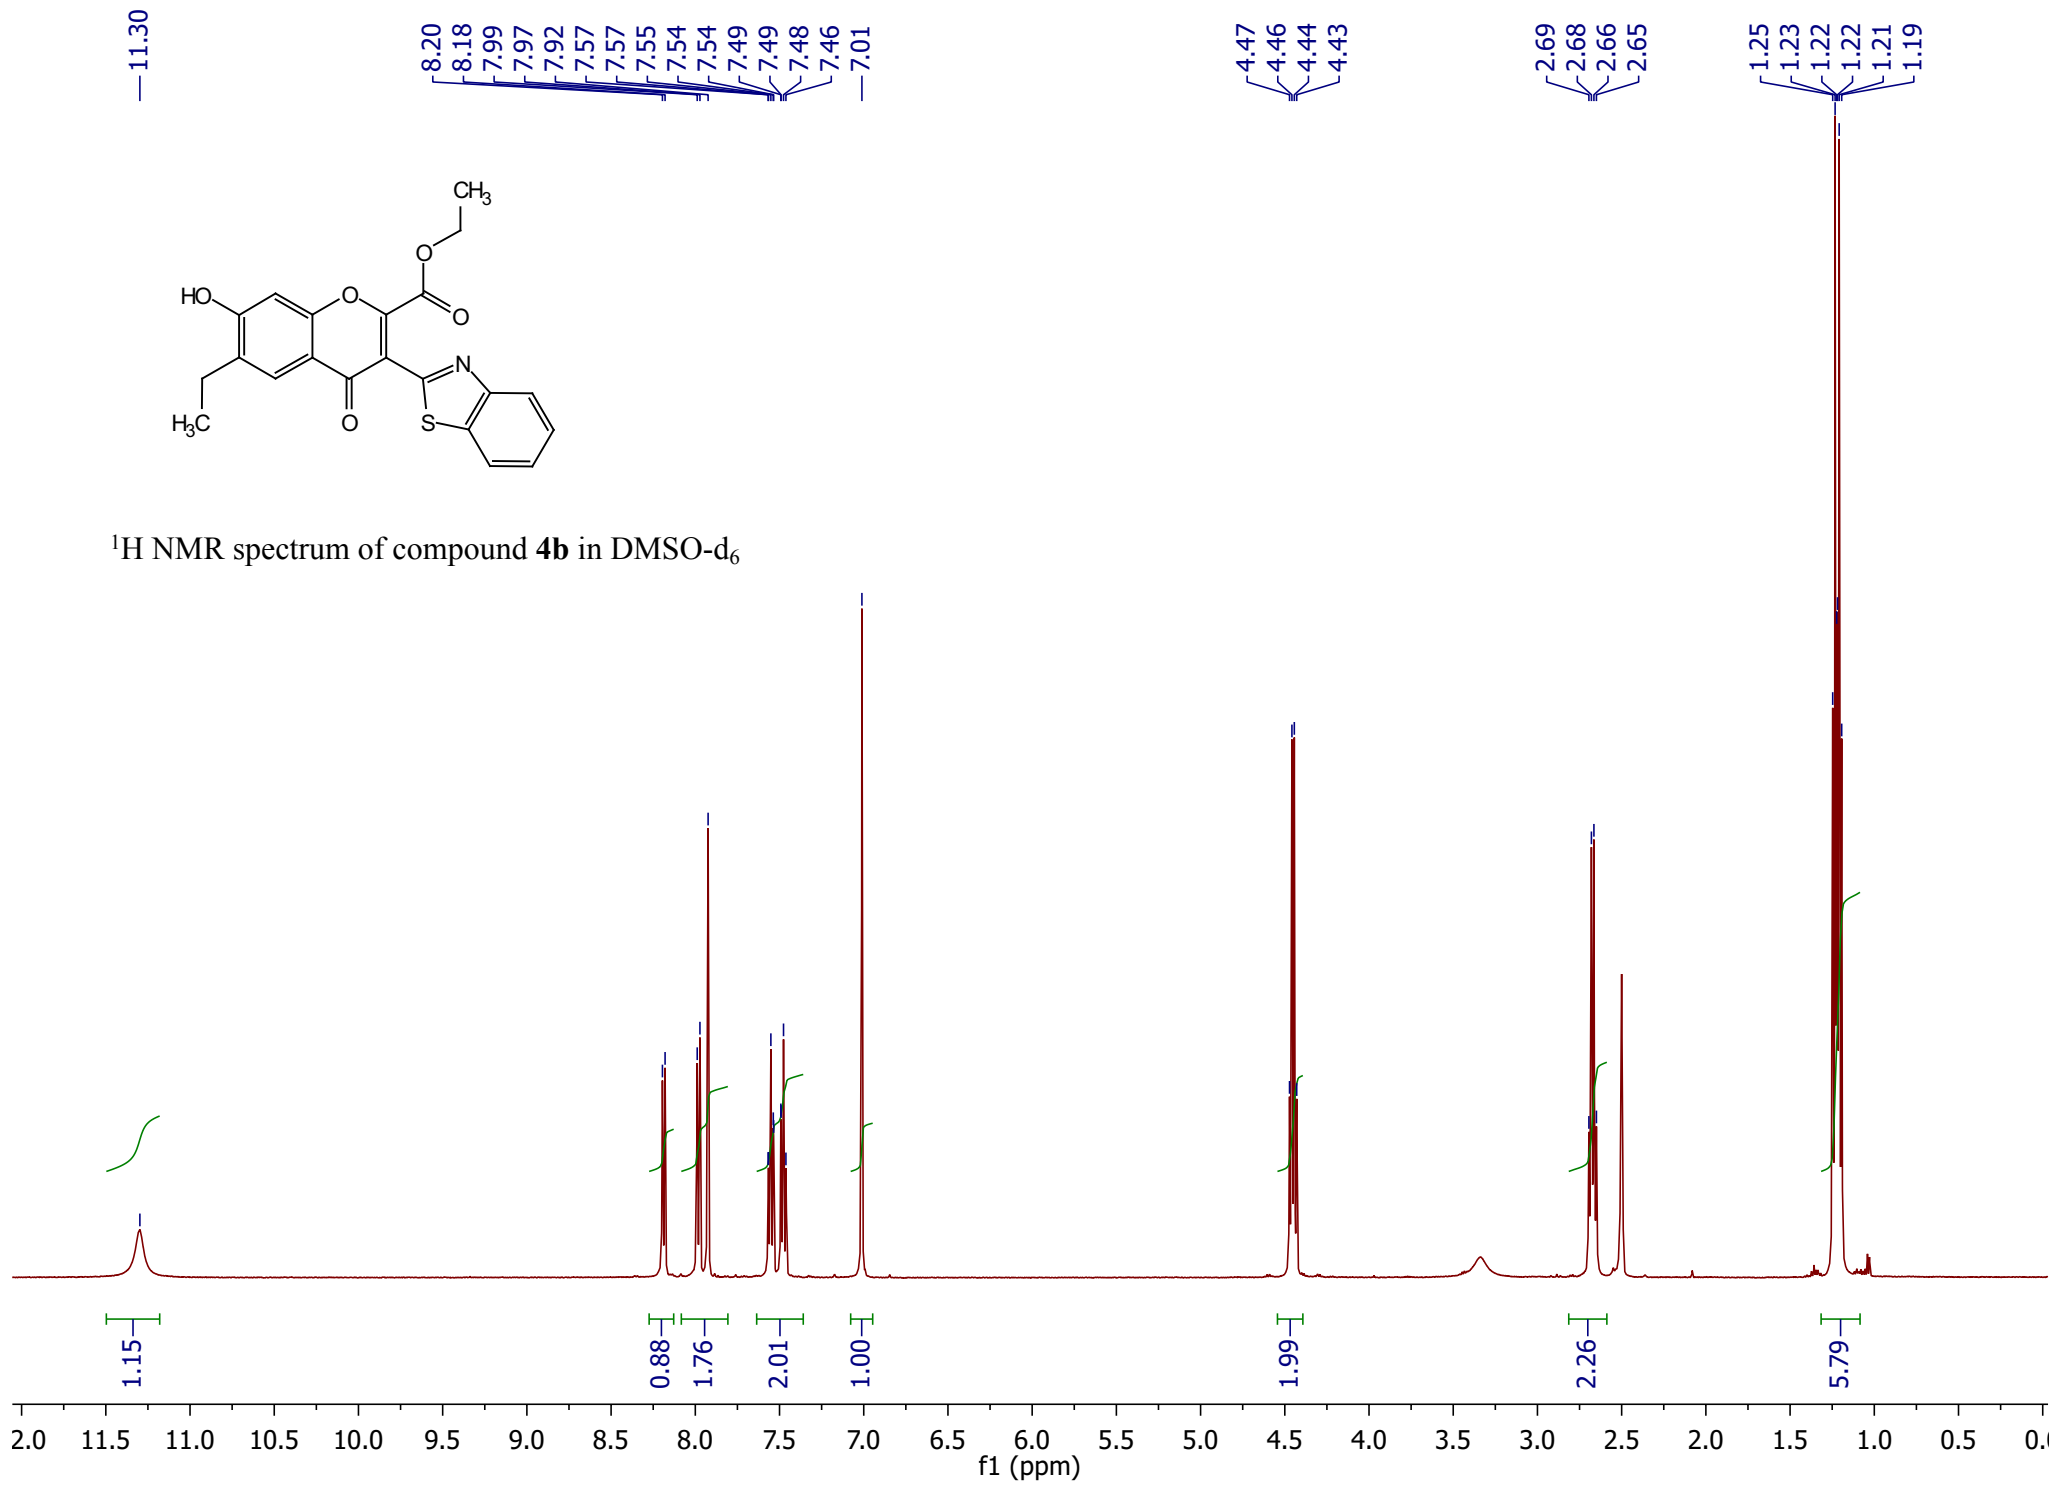



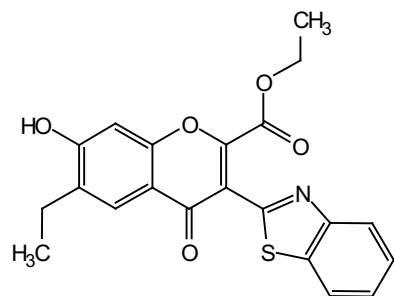

$^{13}\text{C}$  NMR spectrum of compound **4b** in  $\text{DMSO-d}_6$

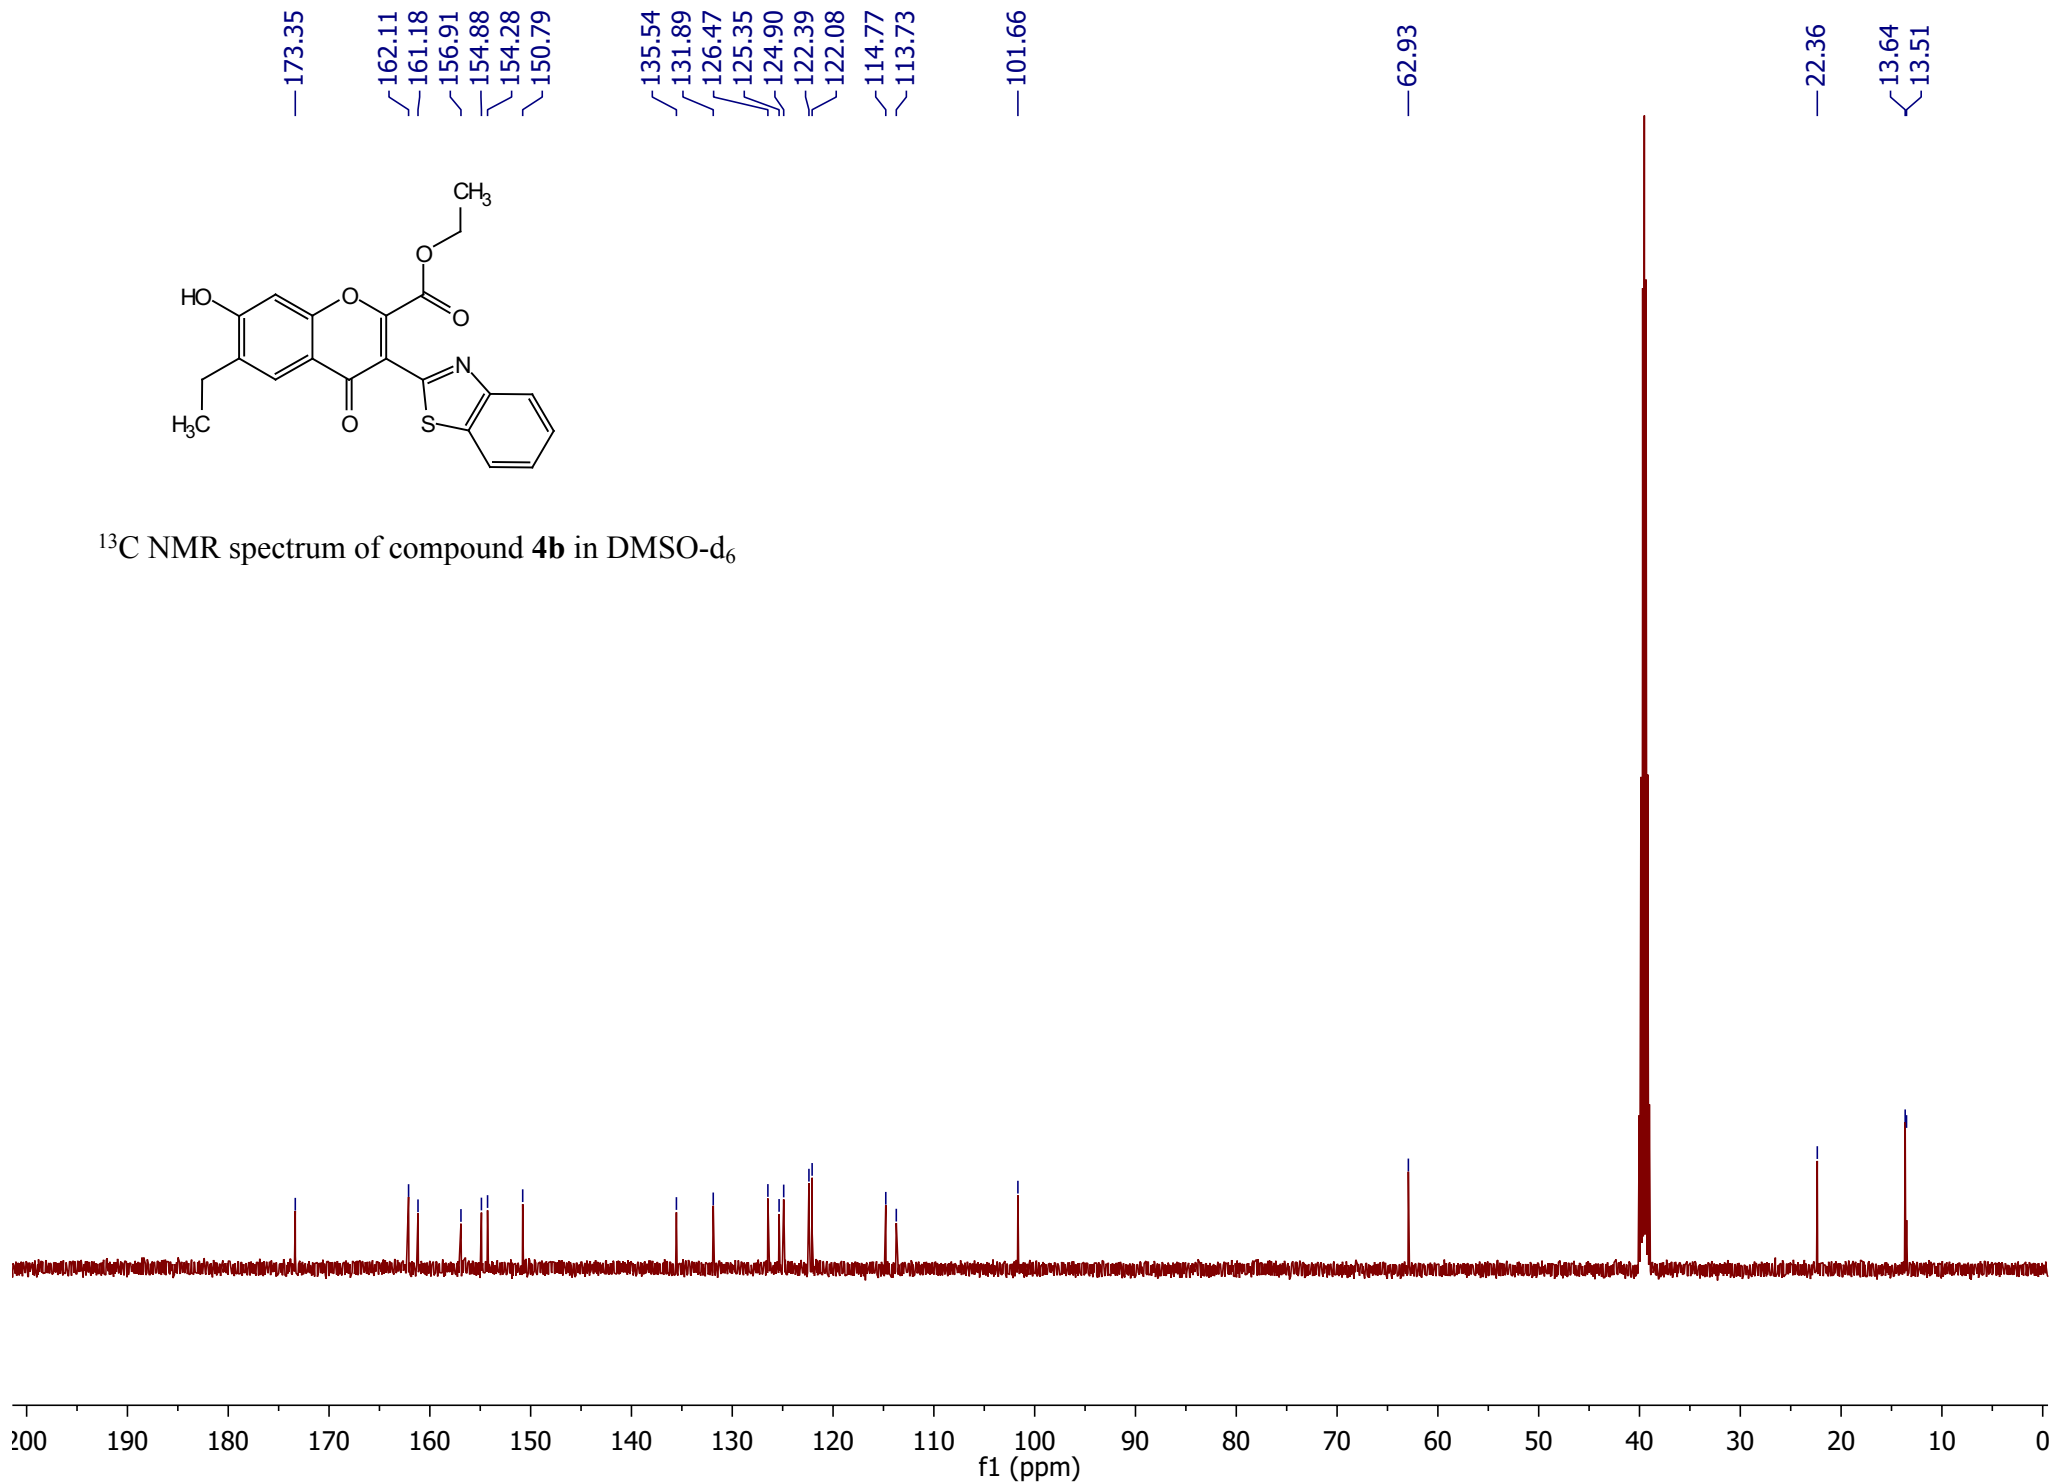

— 11.07

8.17  
8.15  
7.99  
7.97  
7.94  
7.91  
7.56  
7.54  
7.52  
7.48  
7.46  
7.44  
7.12  
7.10

4.50  
4.48  
4.46  
4.44

— 2.24

1.25  
1.23  
1.22

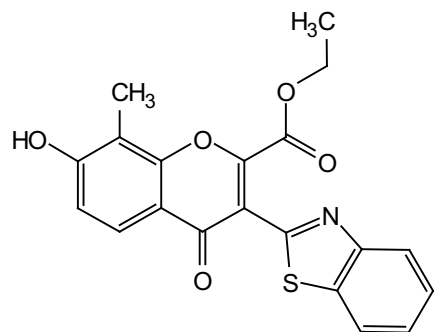

$^1\text{H}$  NMR spectrum of compound **4c** in DMSO- $\text{d}_6$

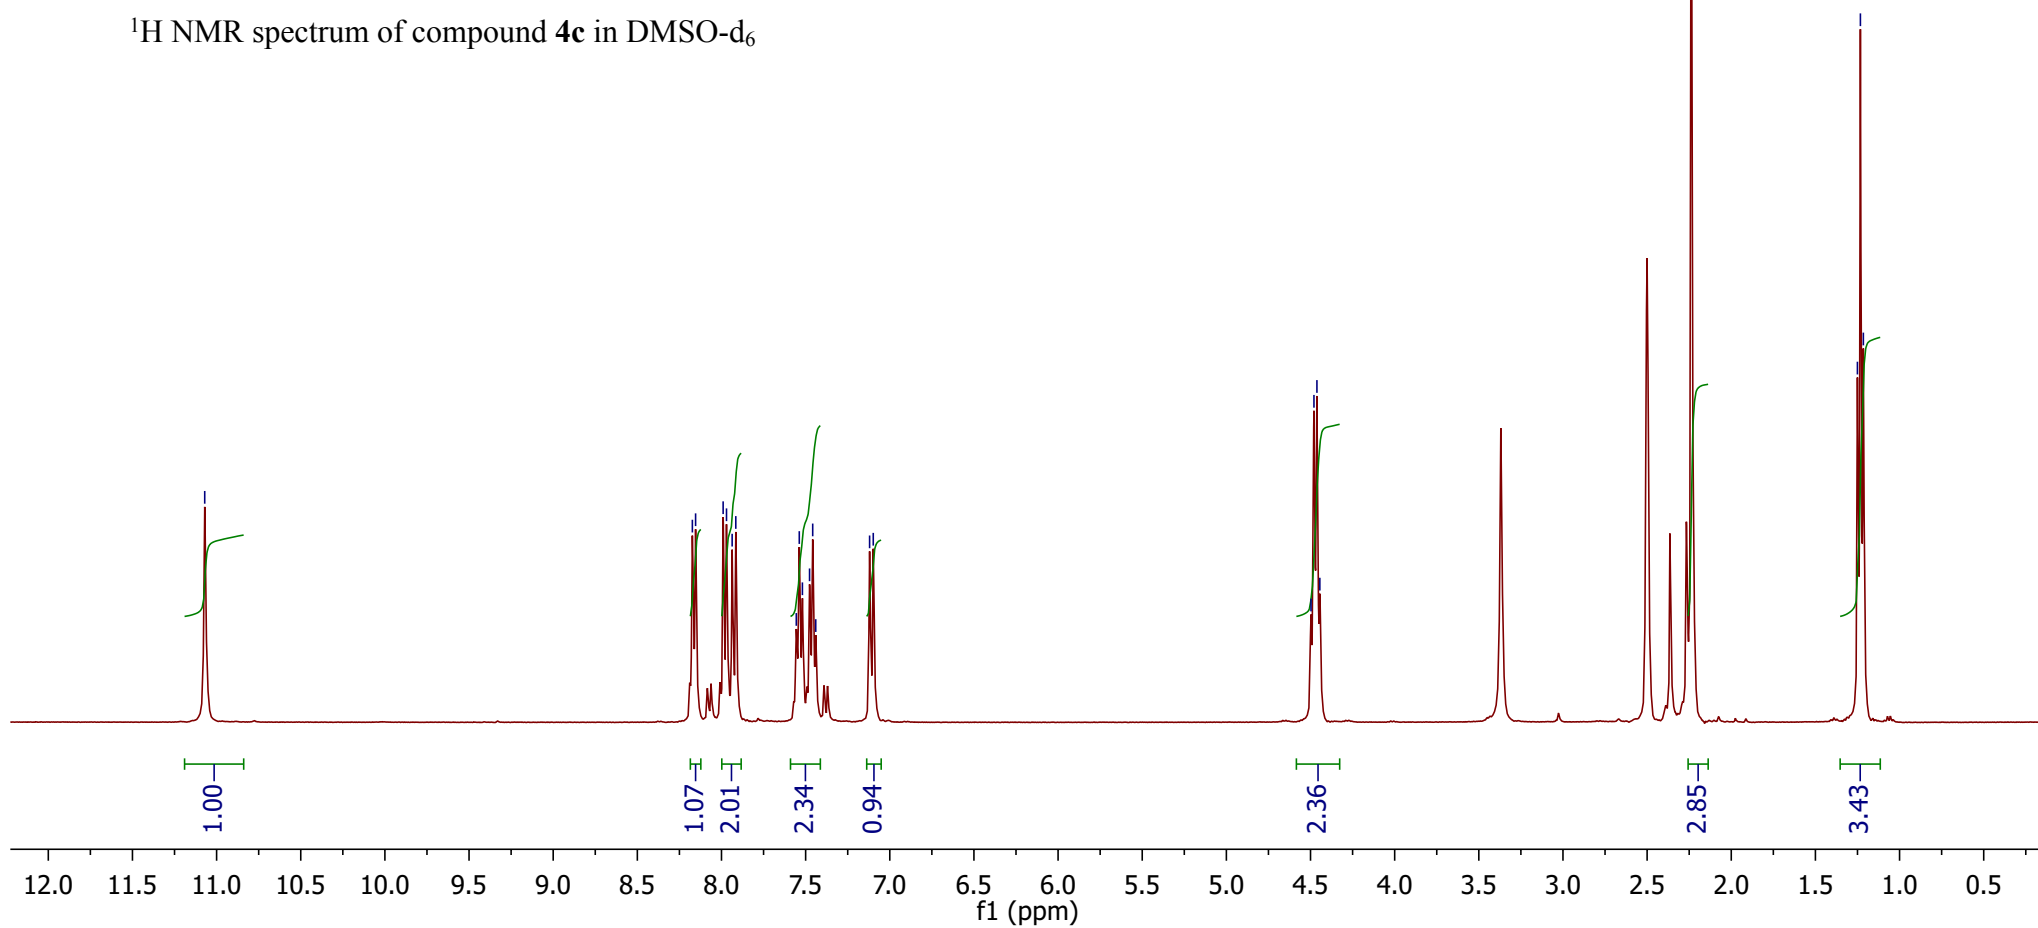

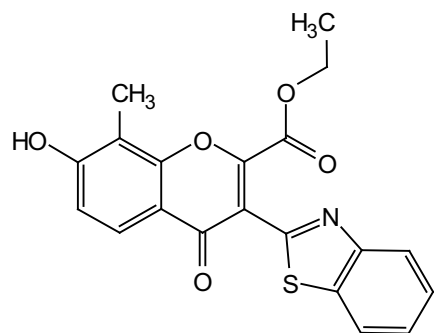

$^{13}\text{C}$  NMR spectrum of compound **4c** in  $\text{DMSO-d}_6$

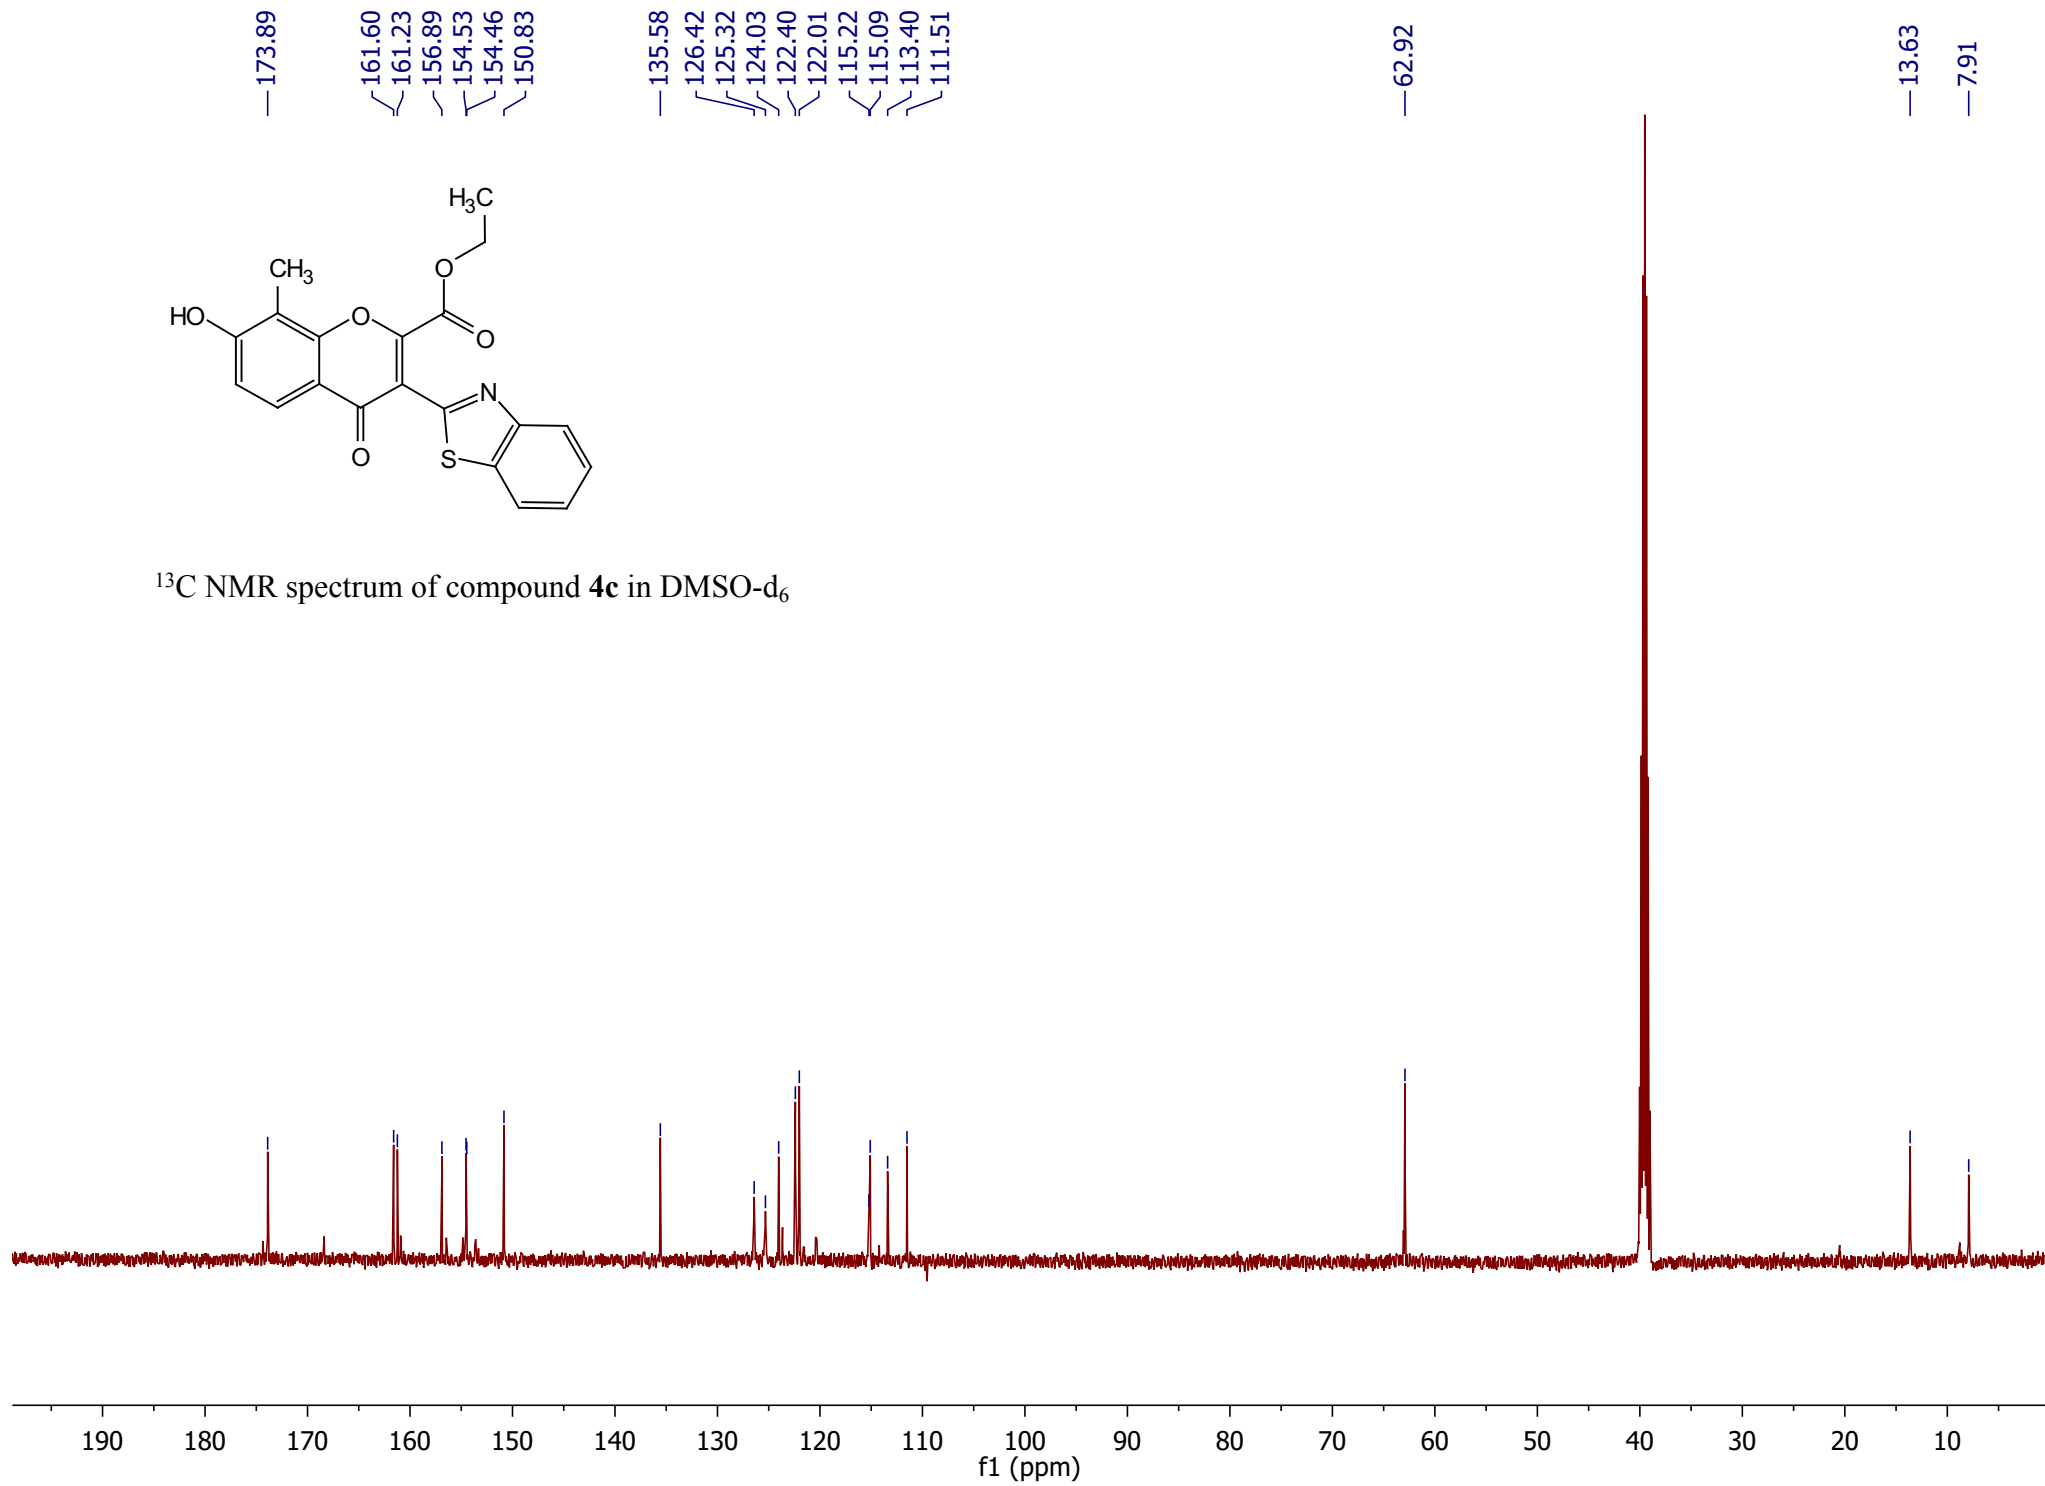

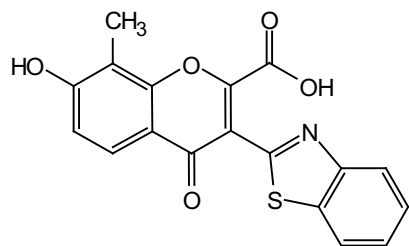

<sup>1</sup>H NMR spectrum of compound **4d** in DMSO-d<sub>6</sub>

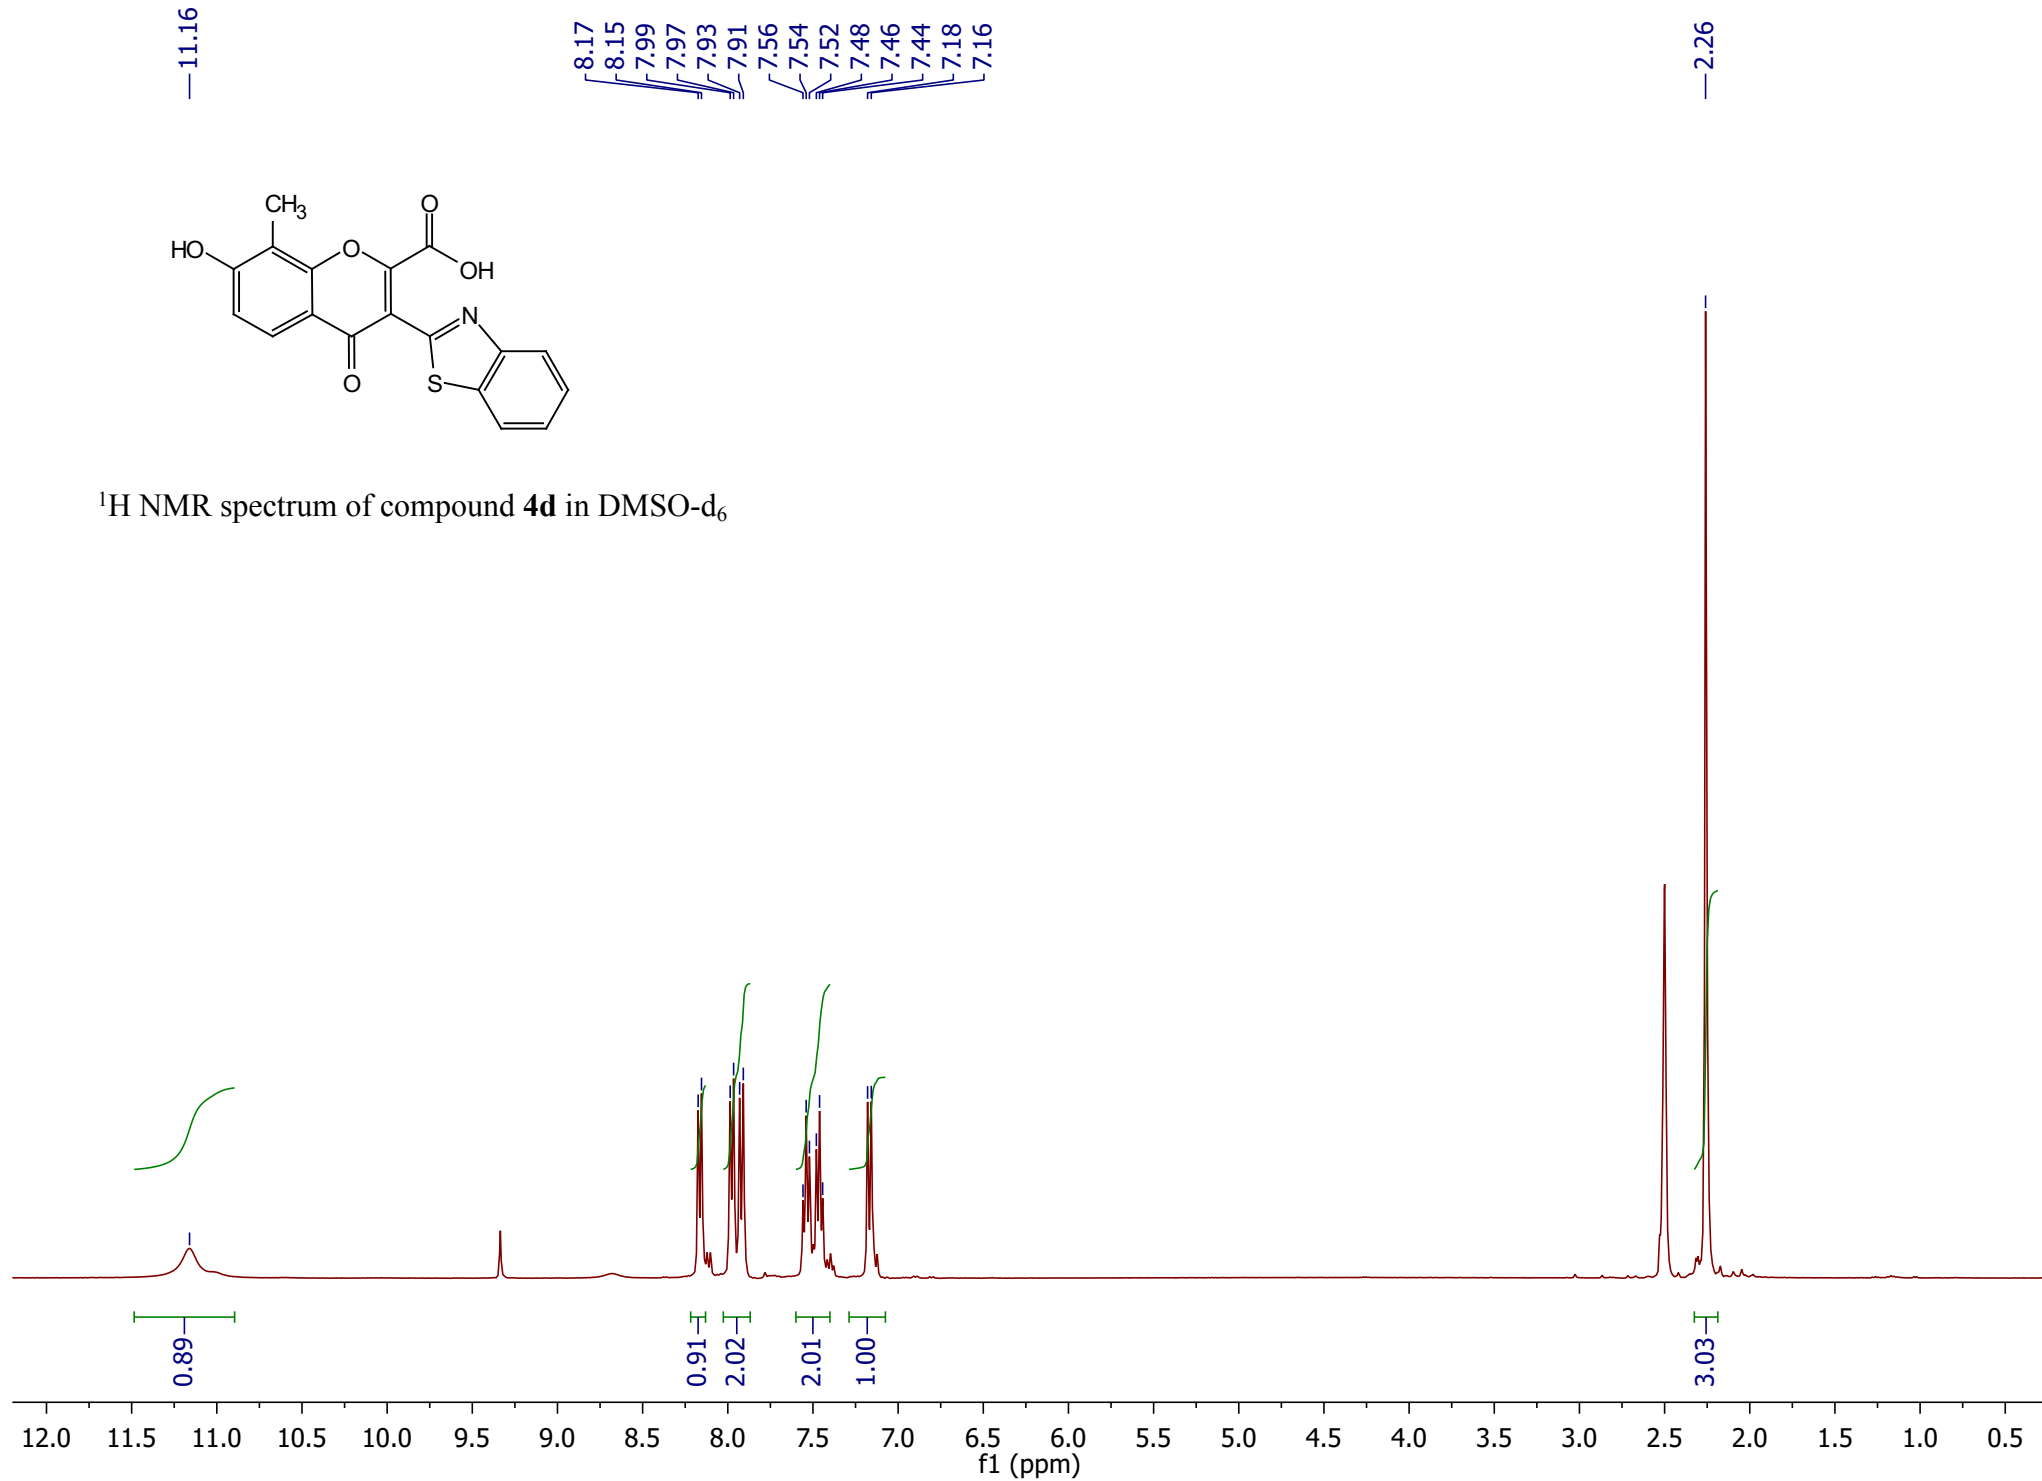

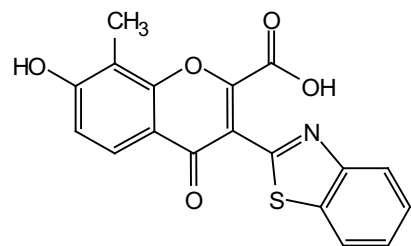

$^{13}\text{C}$  NMR spectrum of compound **4d** in DMSO- $\text{d}_6$

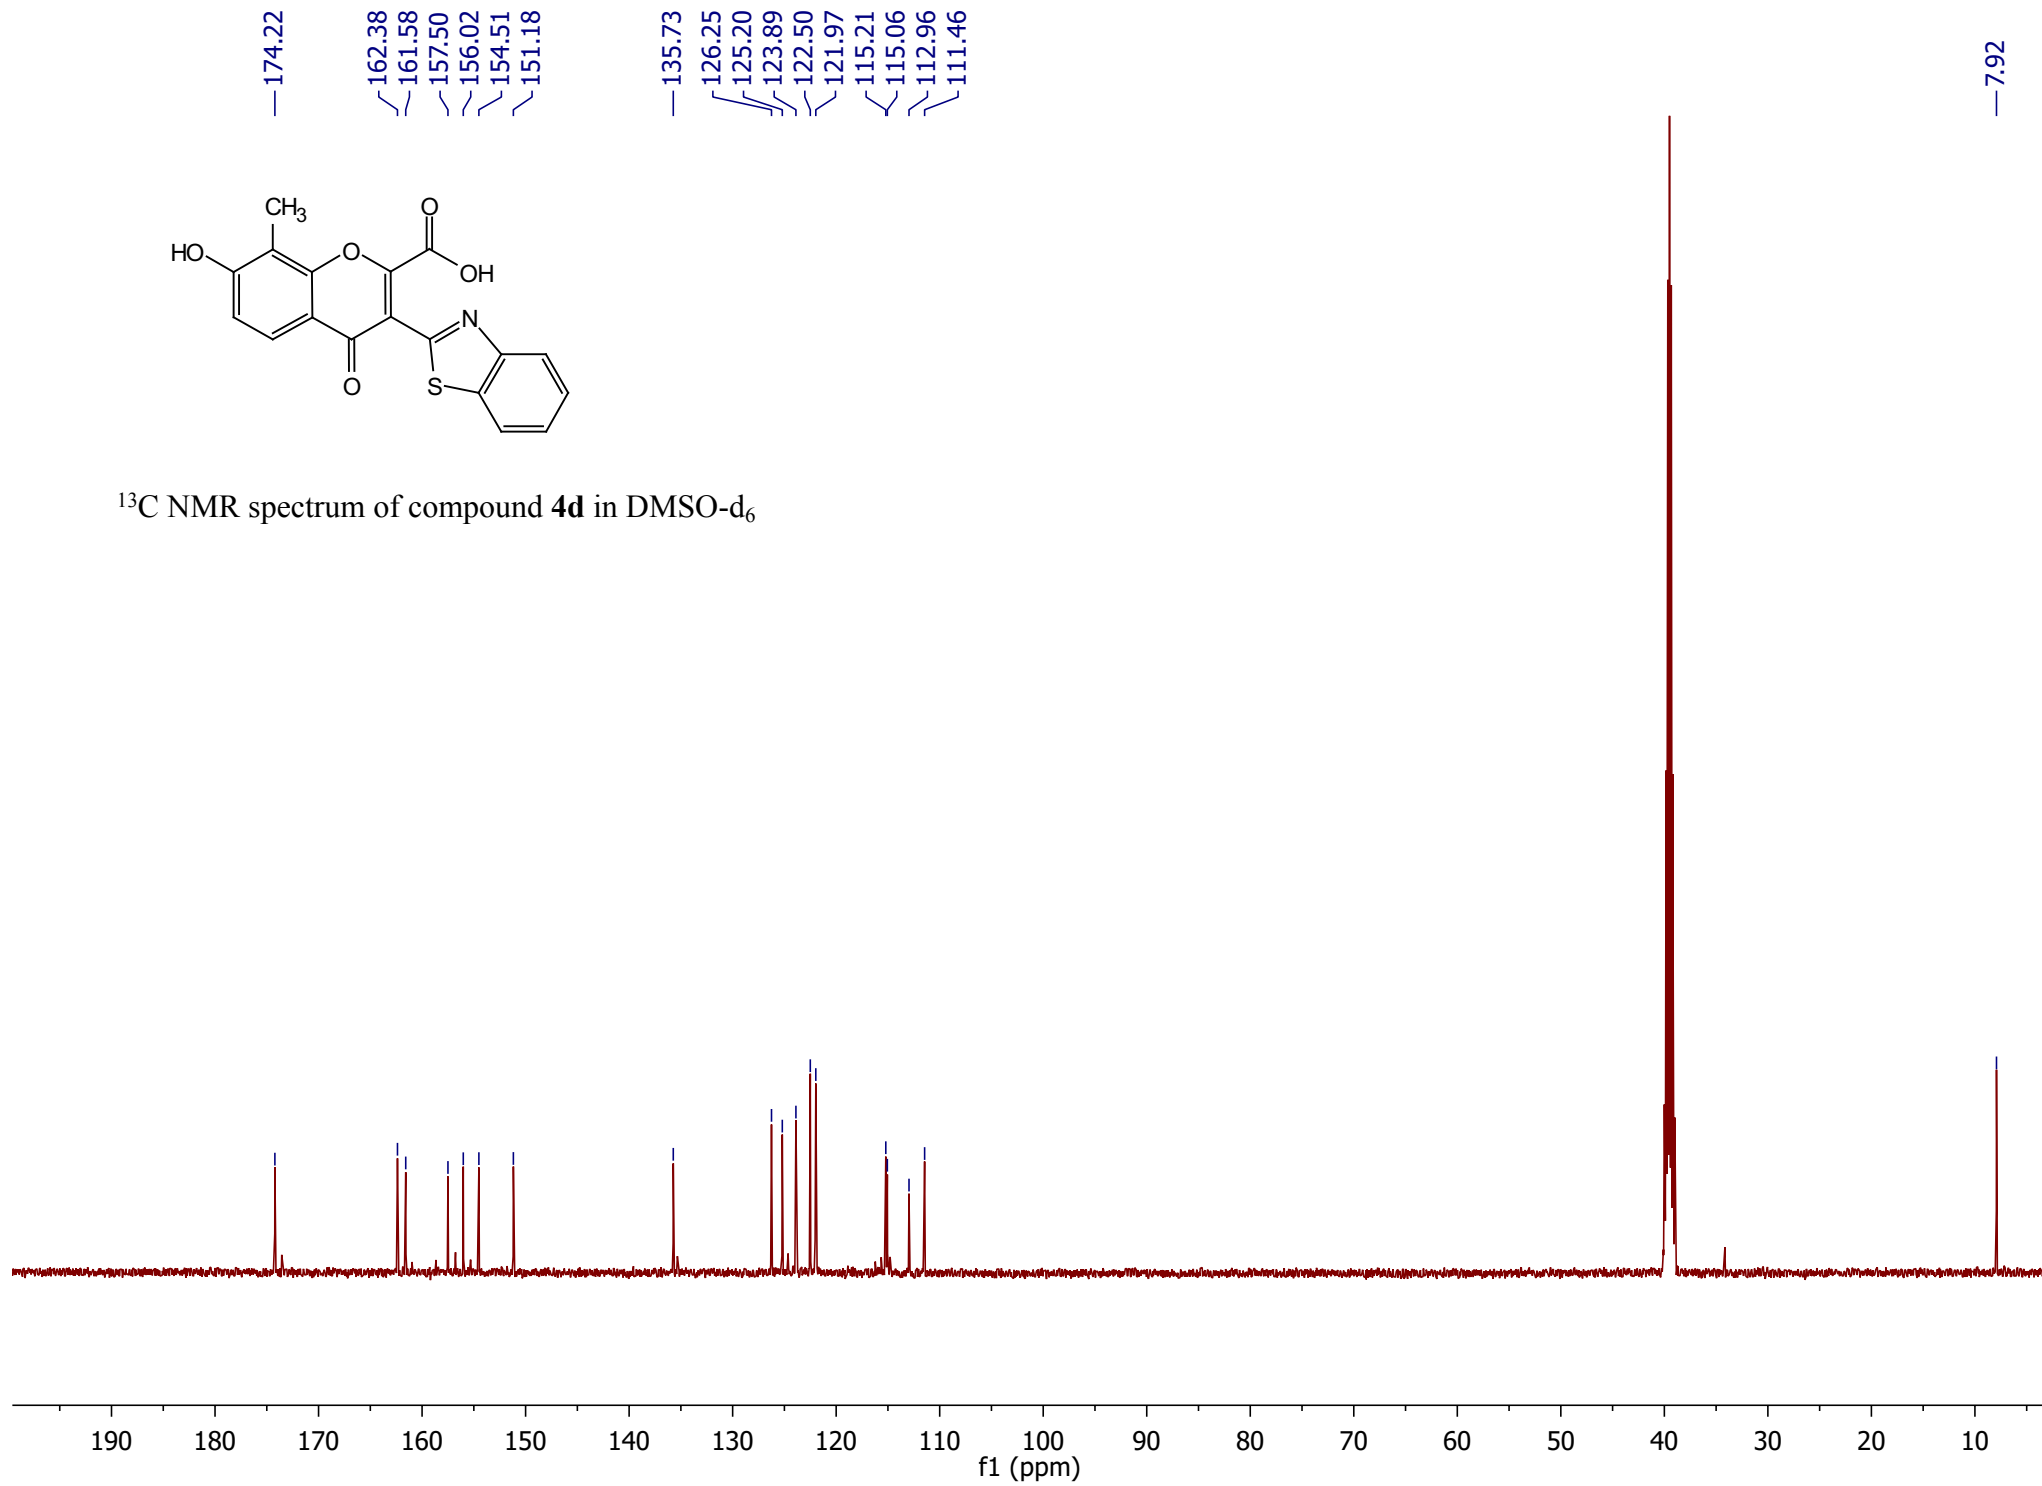

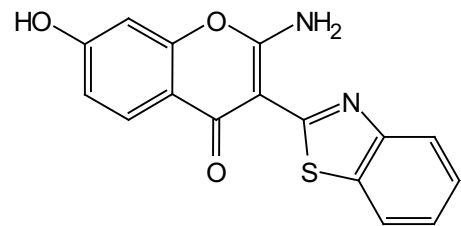

$^1\text{H}$  NMR spectrum of compound **5a** in DMSO- $\text{d}_6$

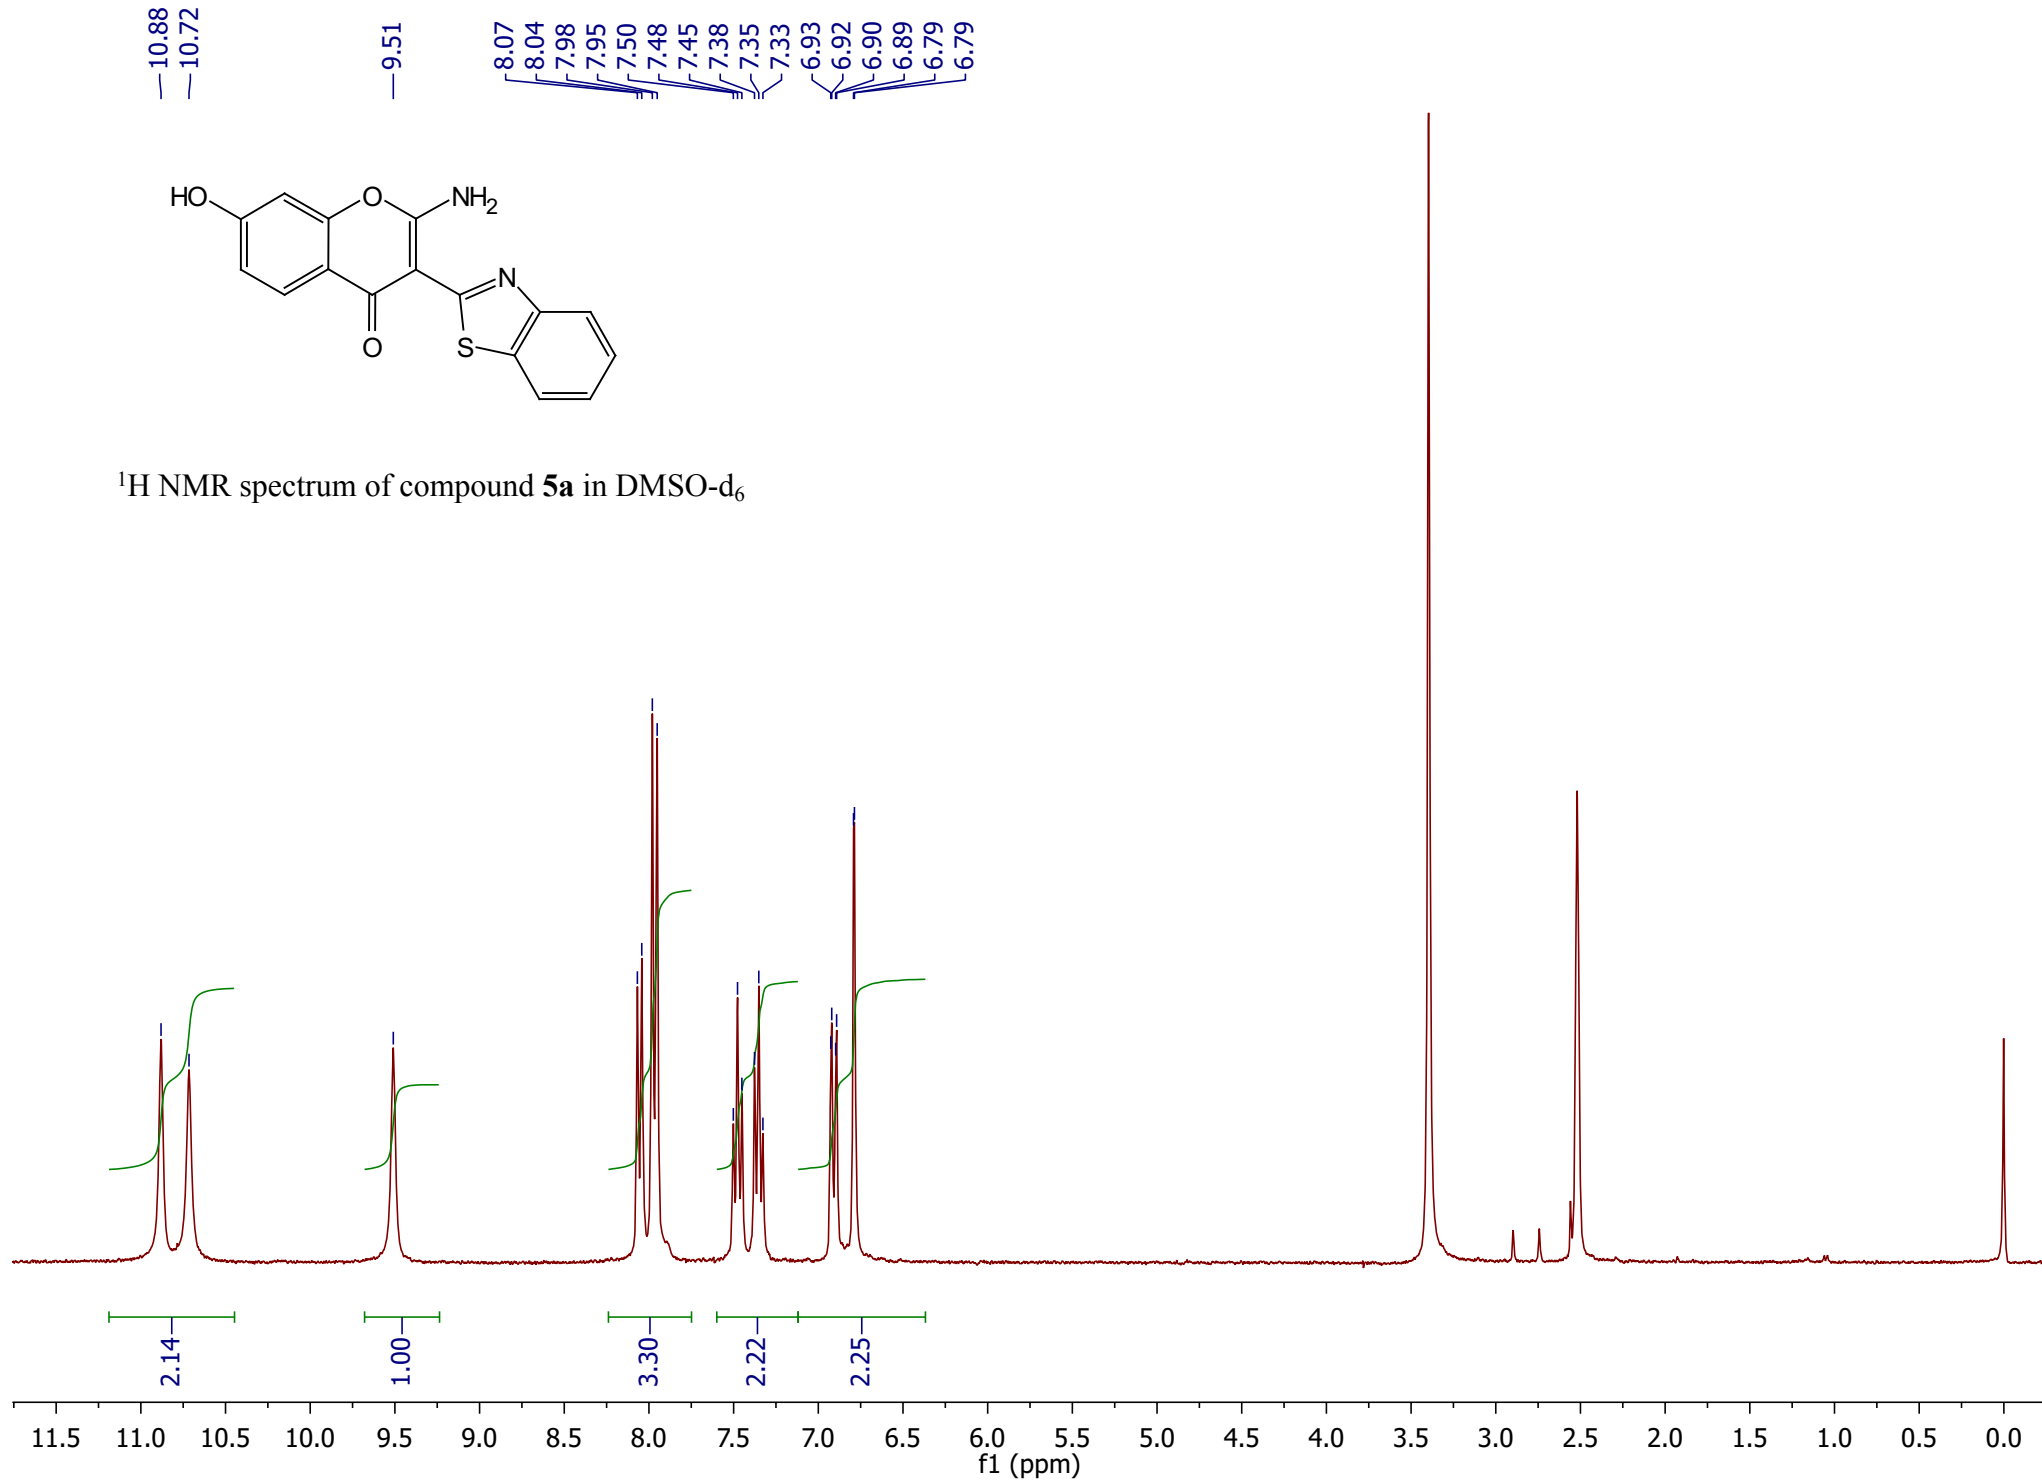

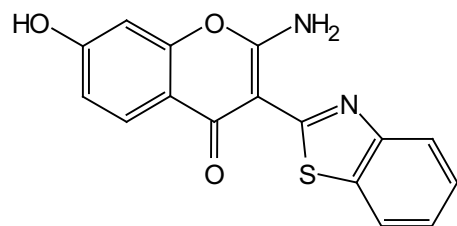

$^{13}\text{C}$  NMR spectrum of compound **5a** in  $\text{DMSO-d}_6$

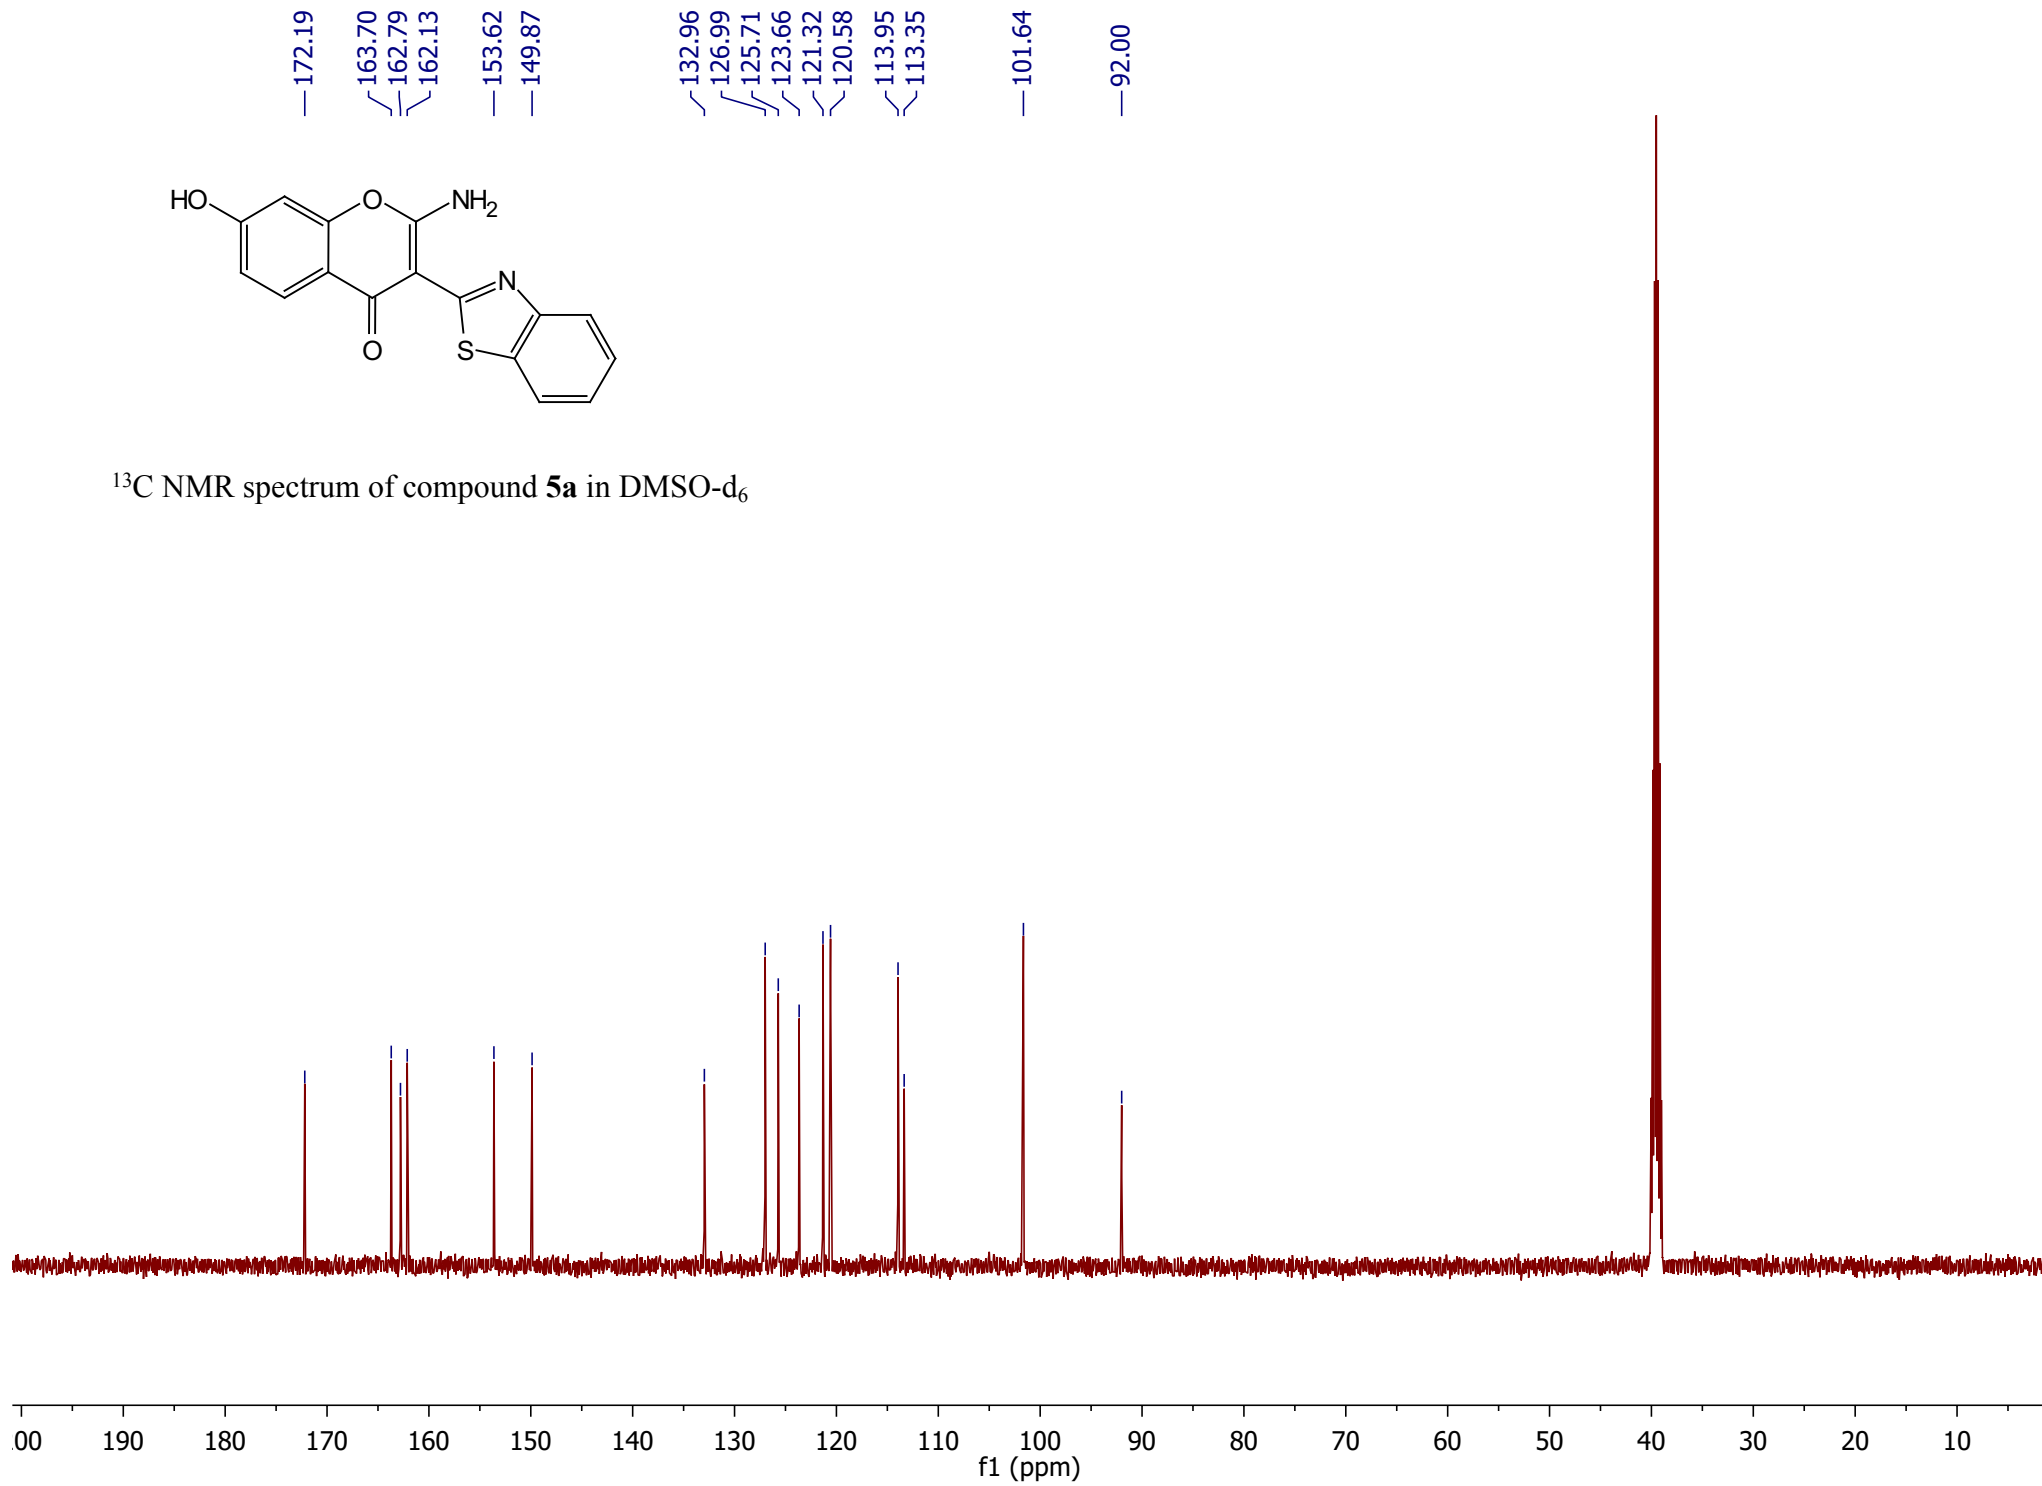

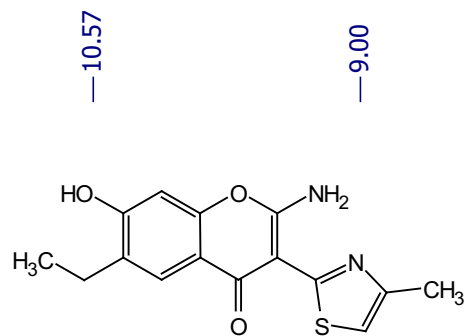

$^1\text{H}$  NMR spectrum of compound **5b** in  $\text{DMSO-d}_6$

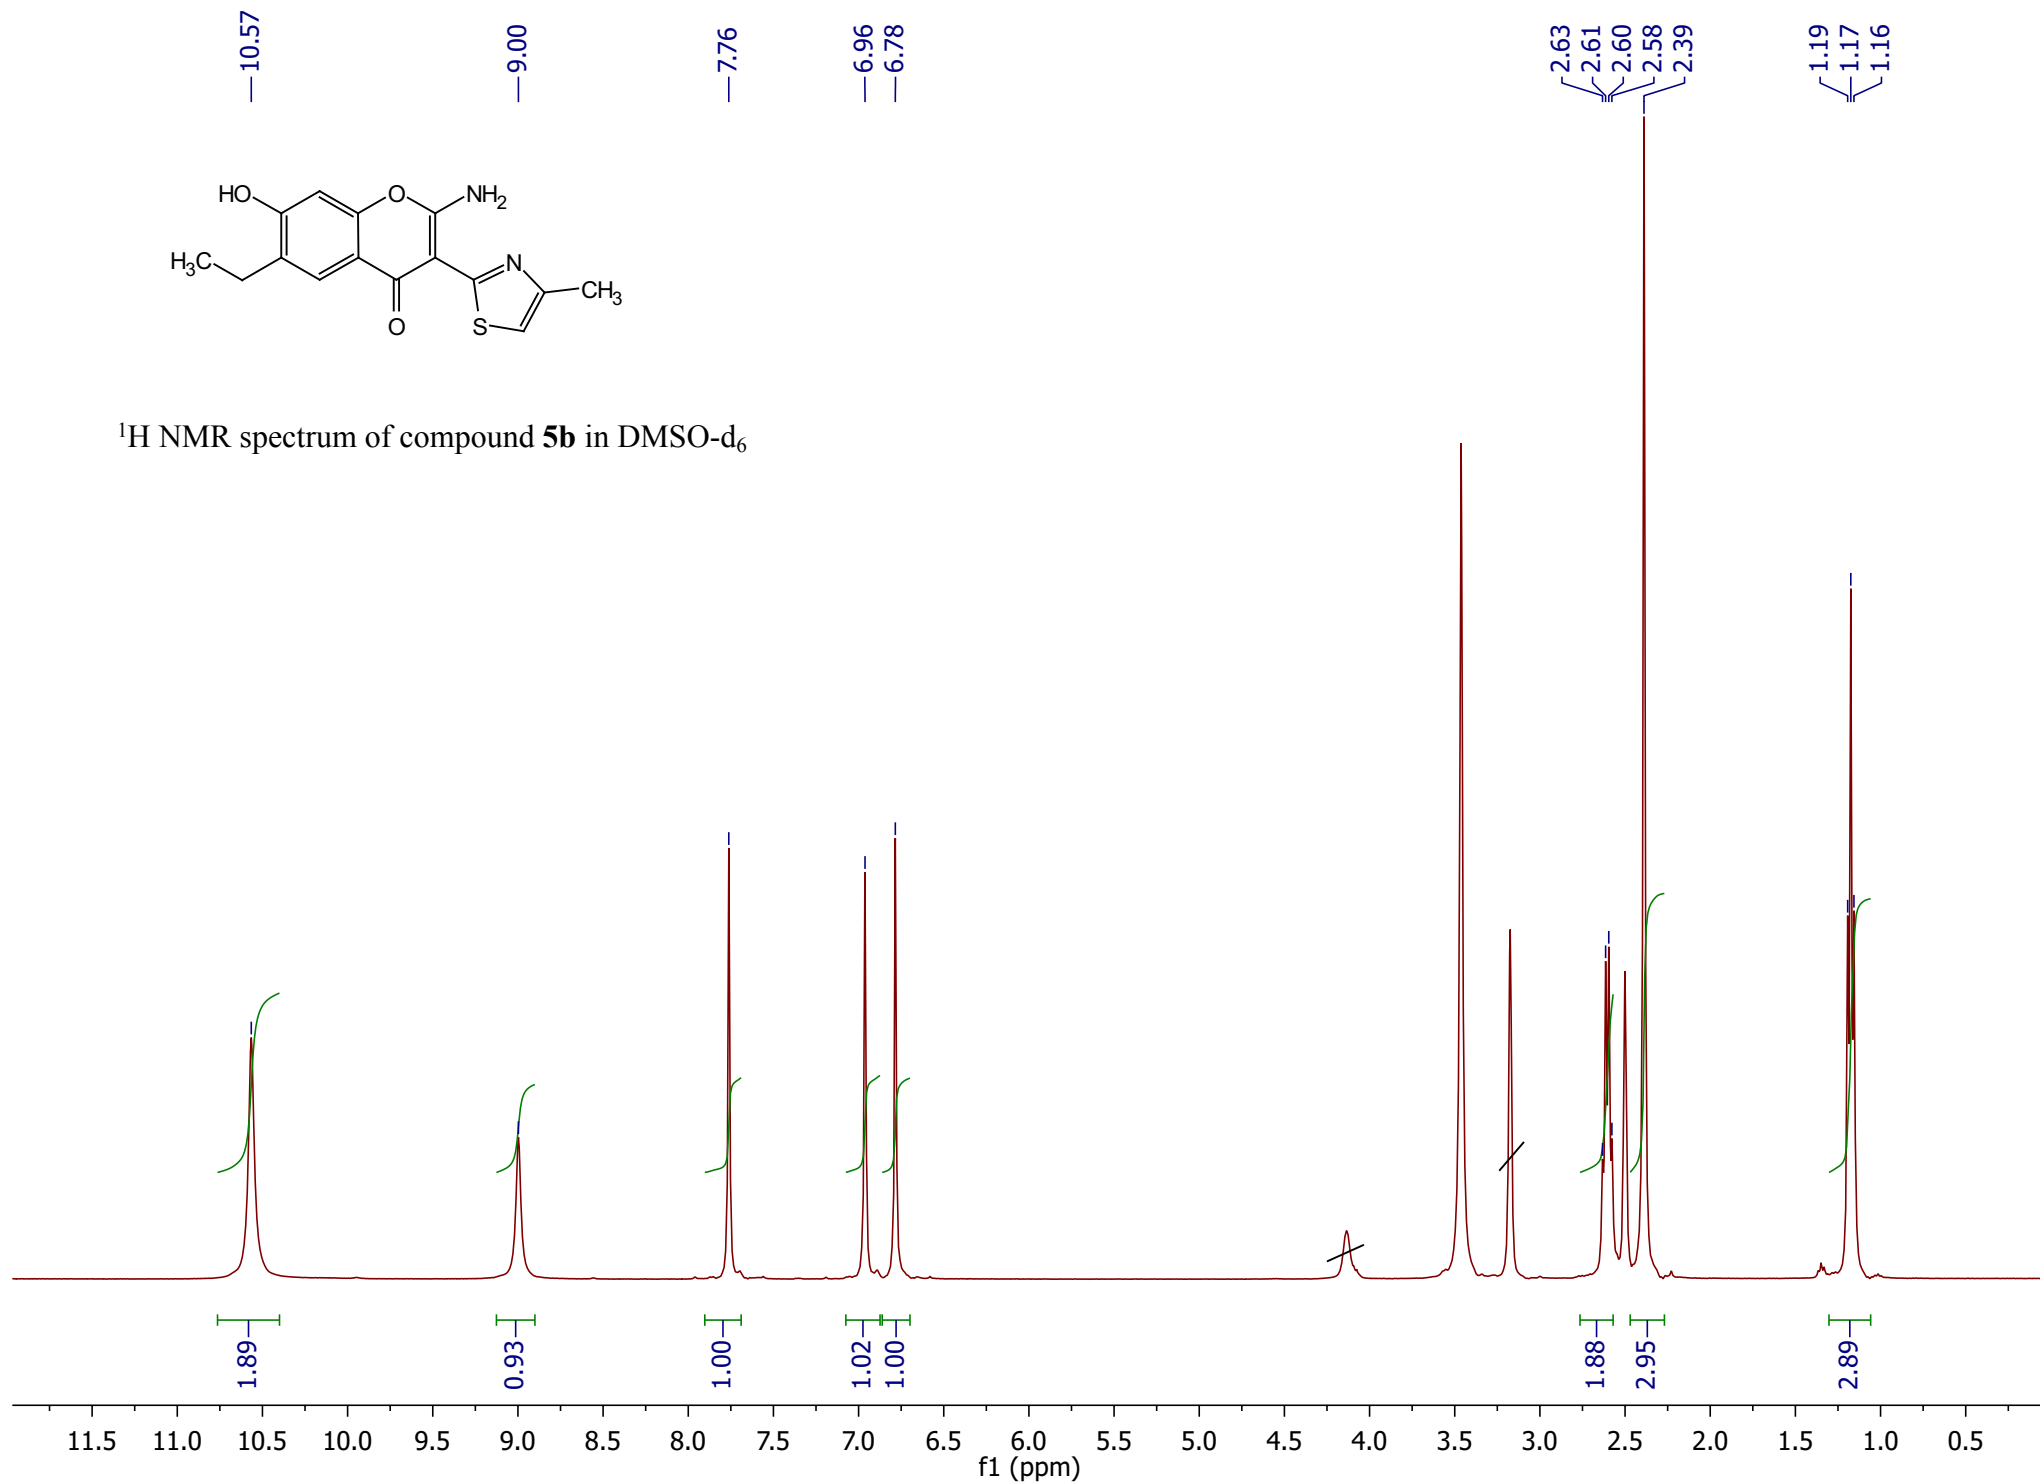



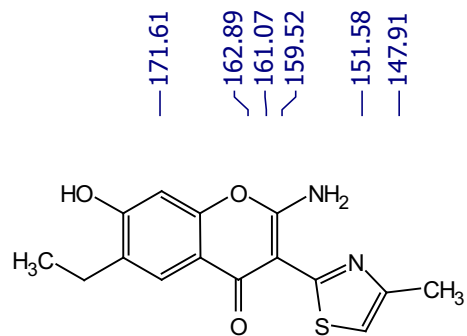

$^{13}\text{C}$  NMR spectrum of compound **5b** in DMSO- $\text{d}_6$

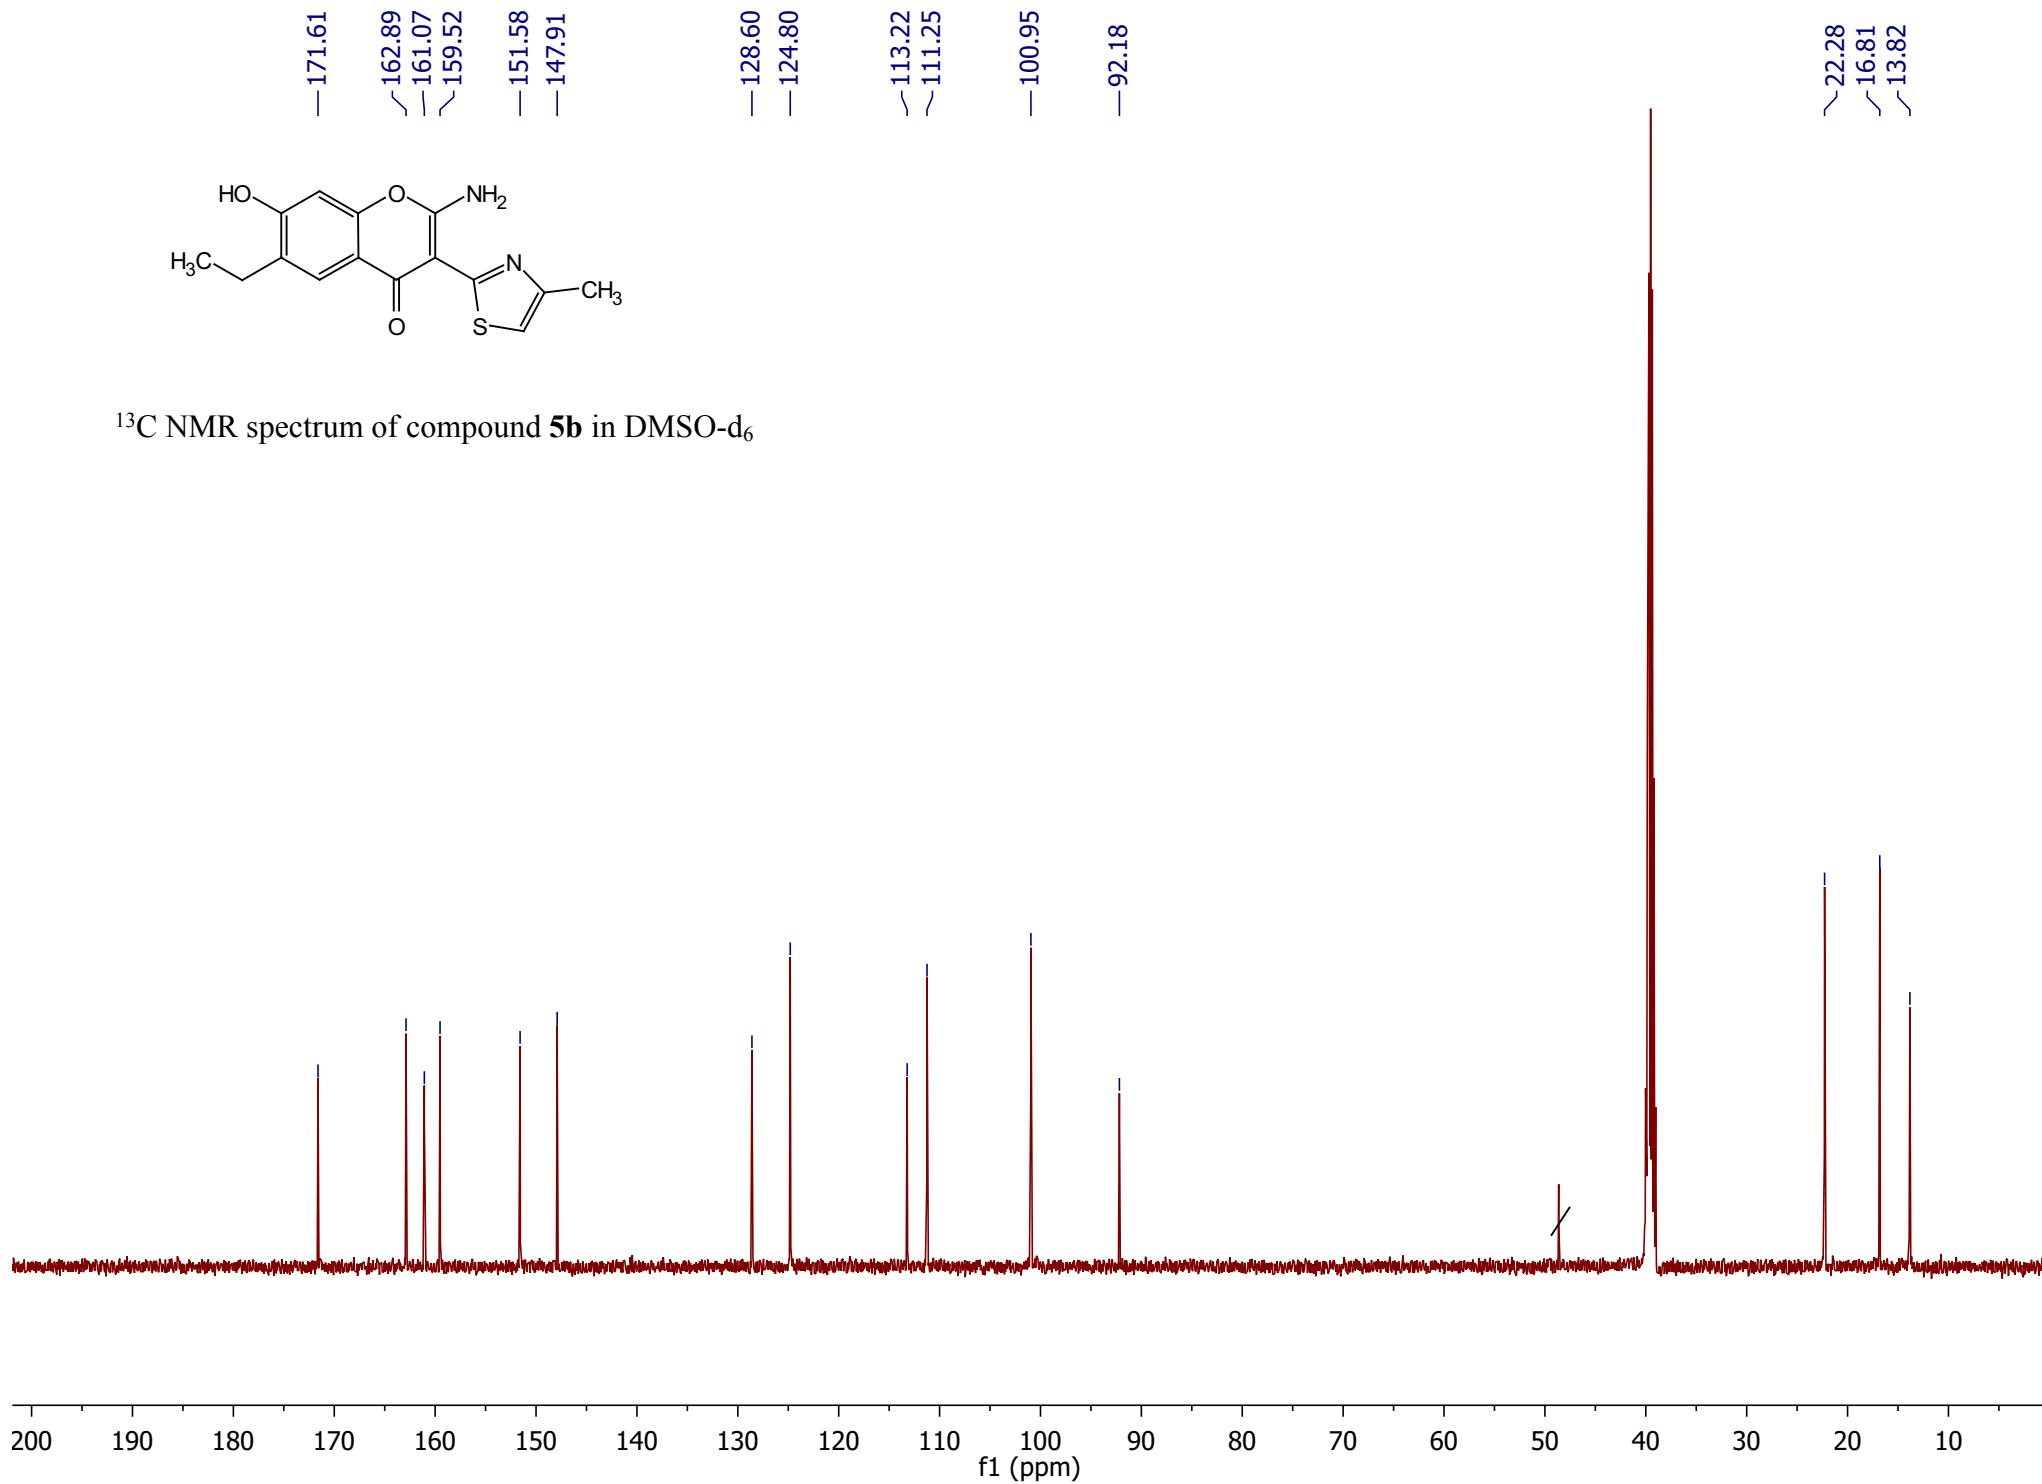

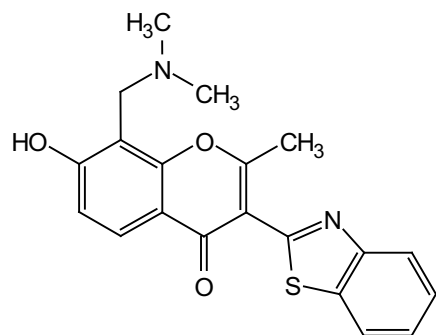

$^1\text{H}$  NMR spectrum of compound **7a** in  $\text{CDCl}_3$

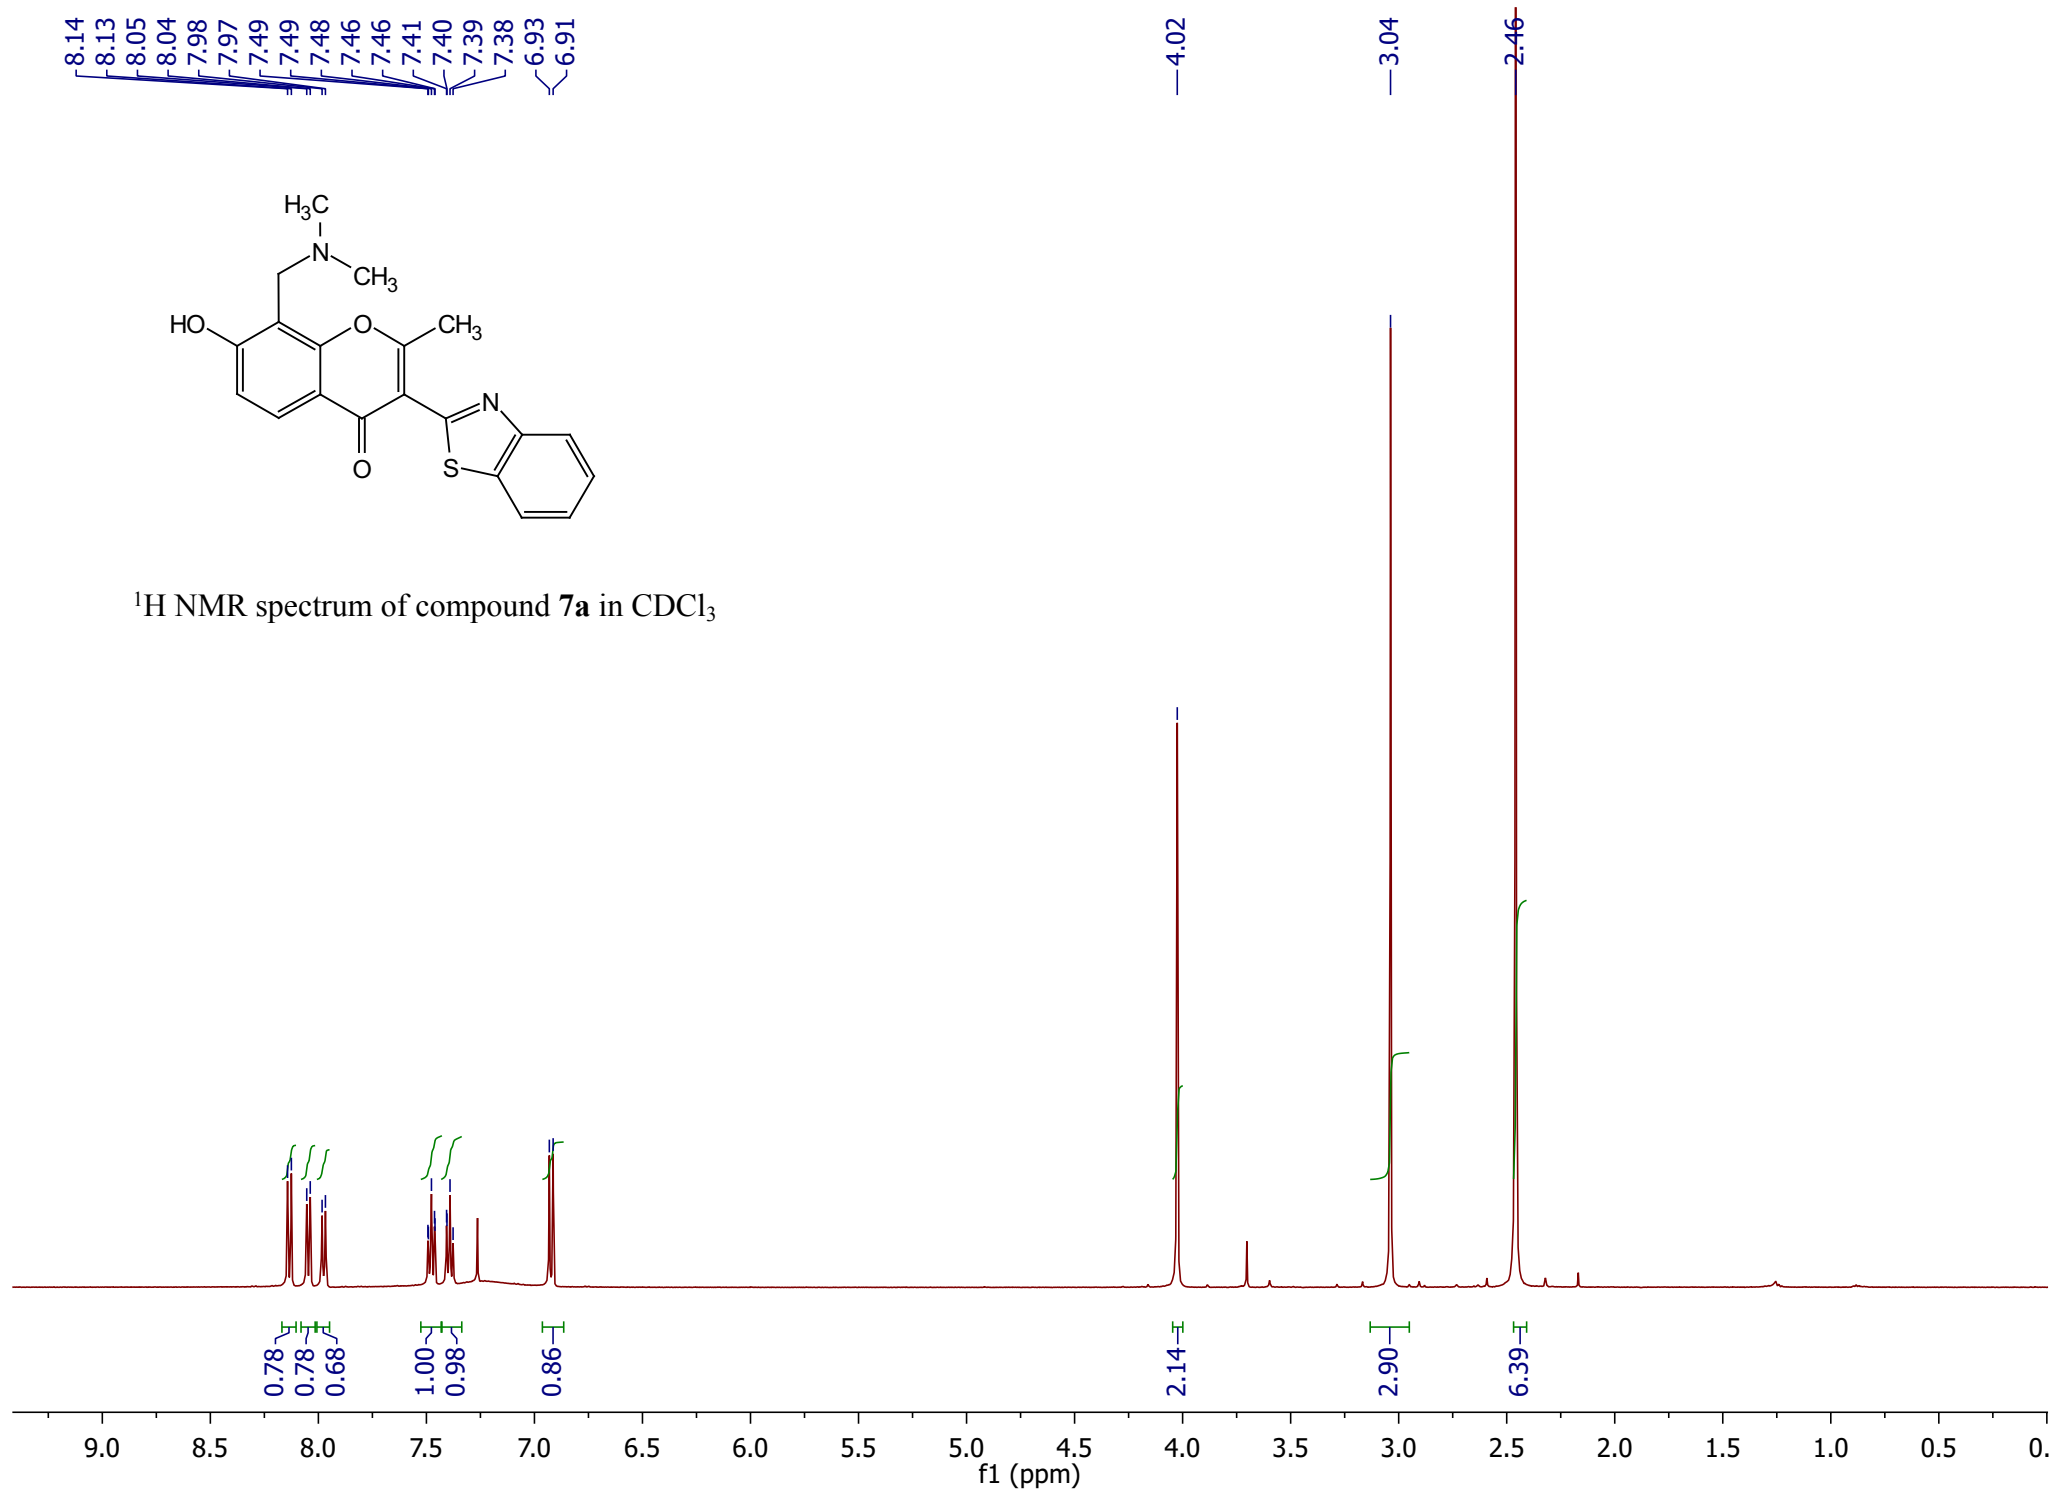

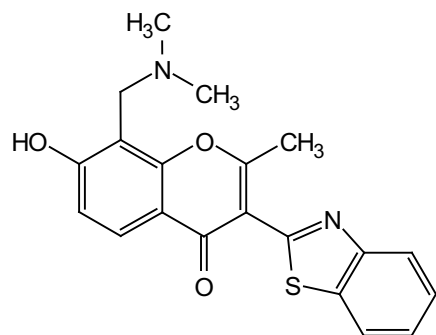

$^{13}\text{C}$  NMR spectrum of compound **7a** in  $\text{CDCl}_3$

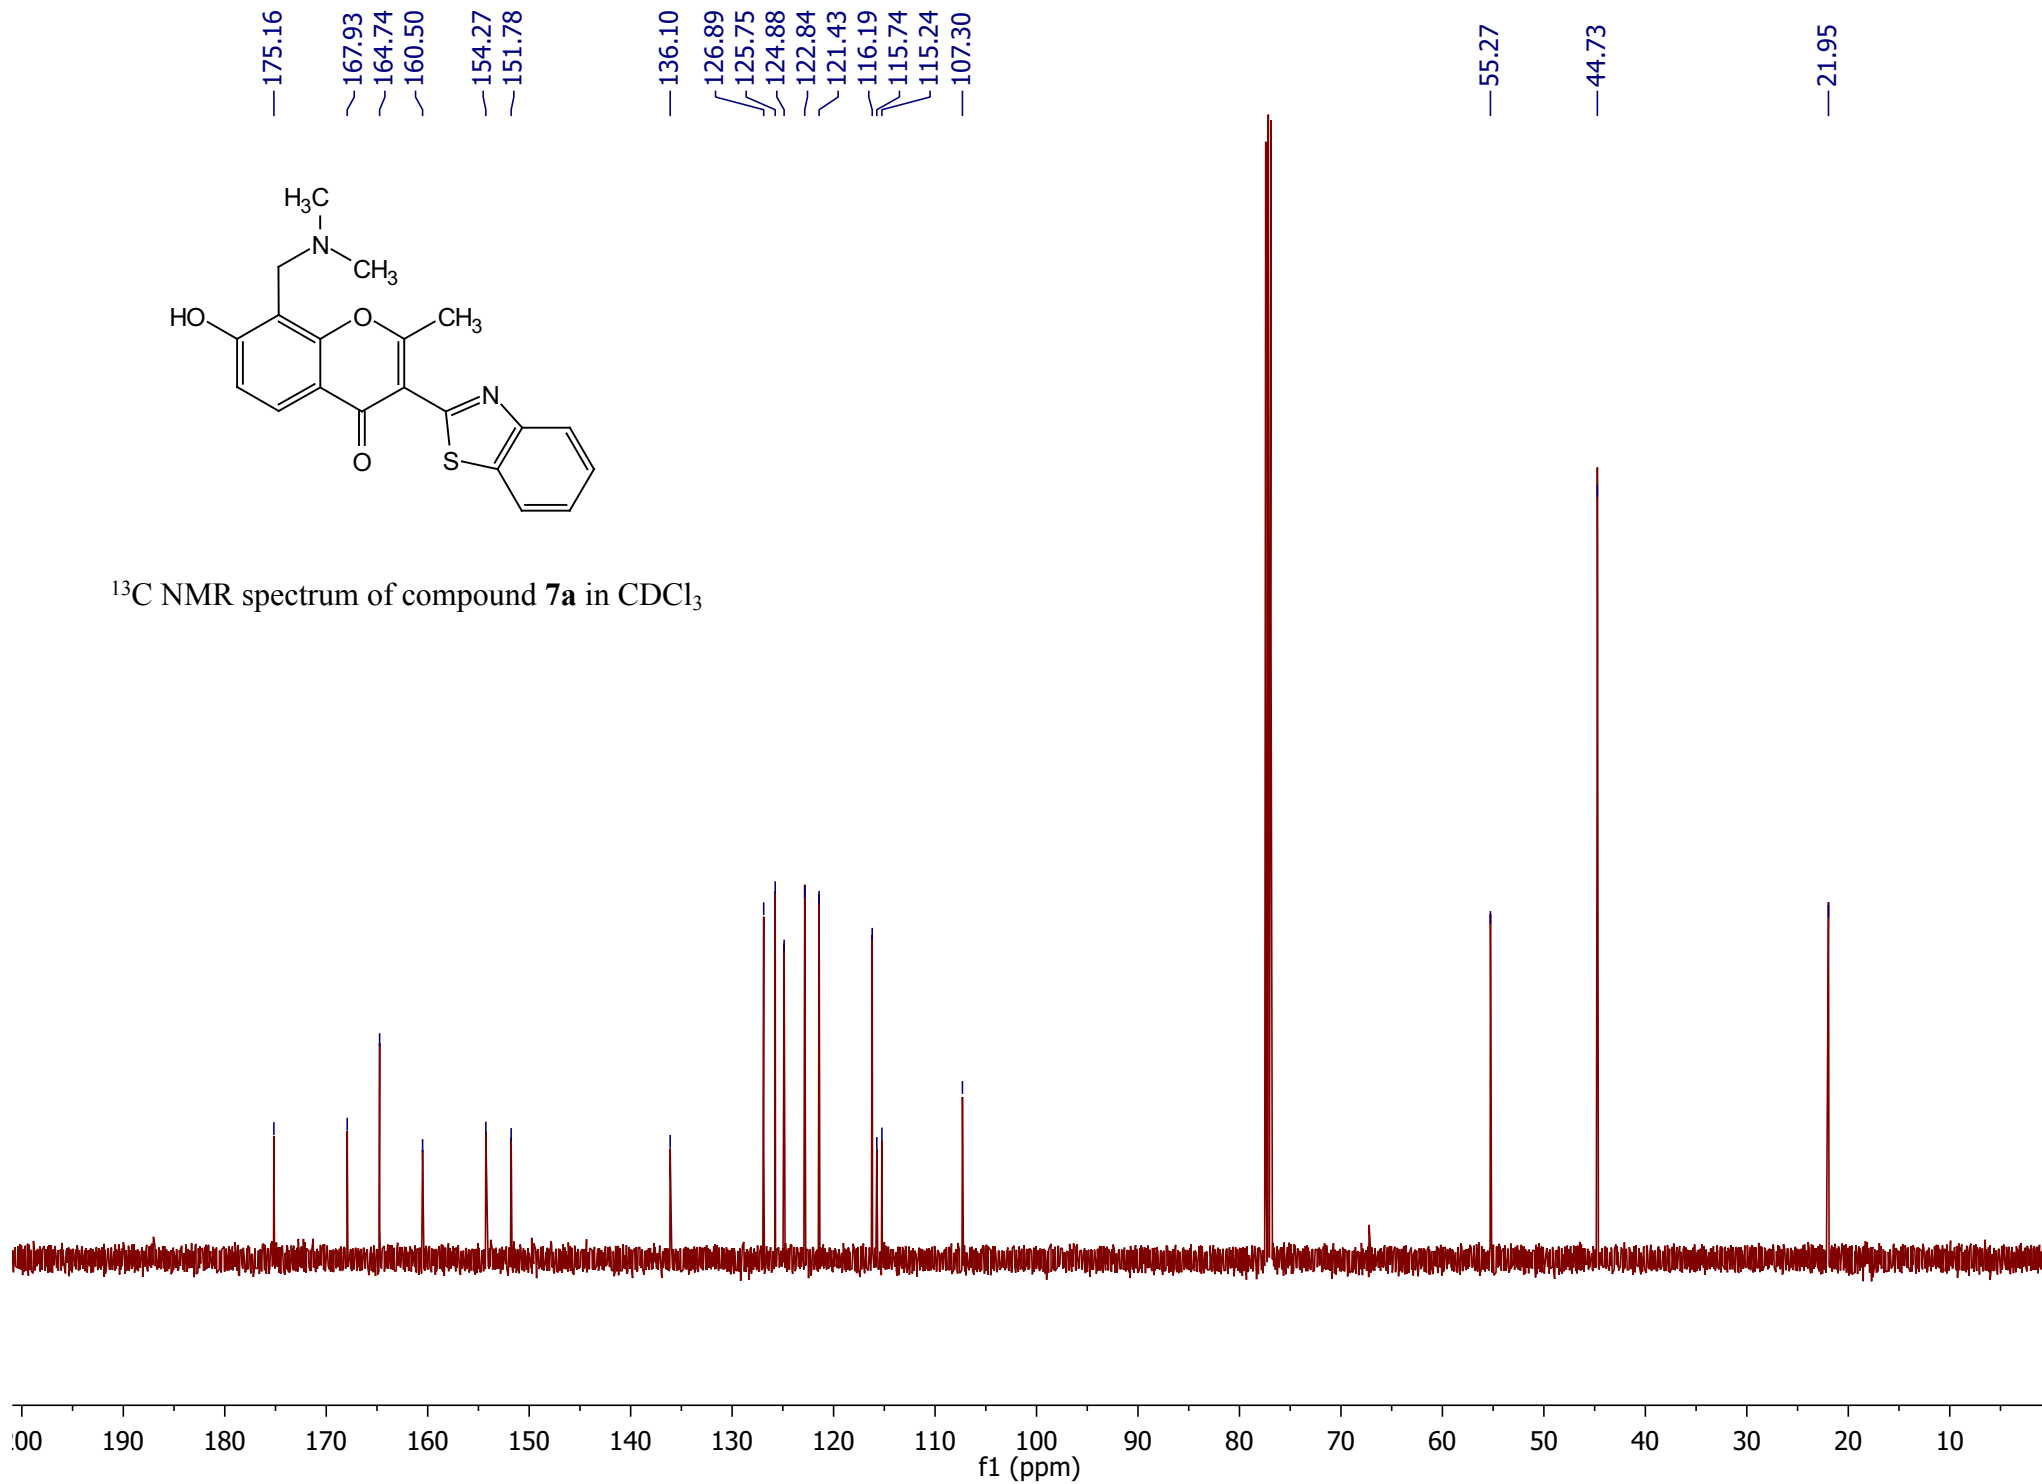

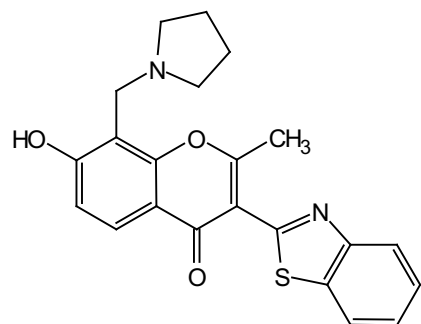

$^1\text{H}$  NMR spectrum of compound **7b** in  $\text{CDCl}_3$

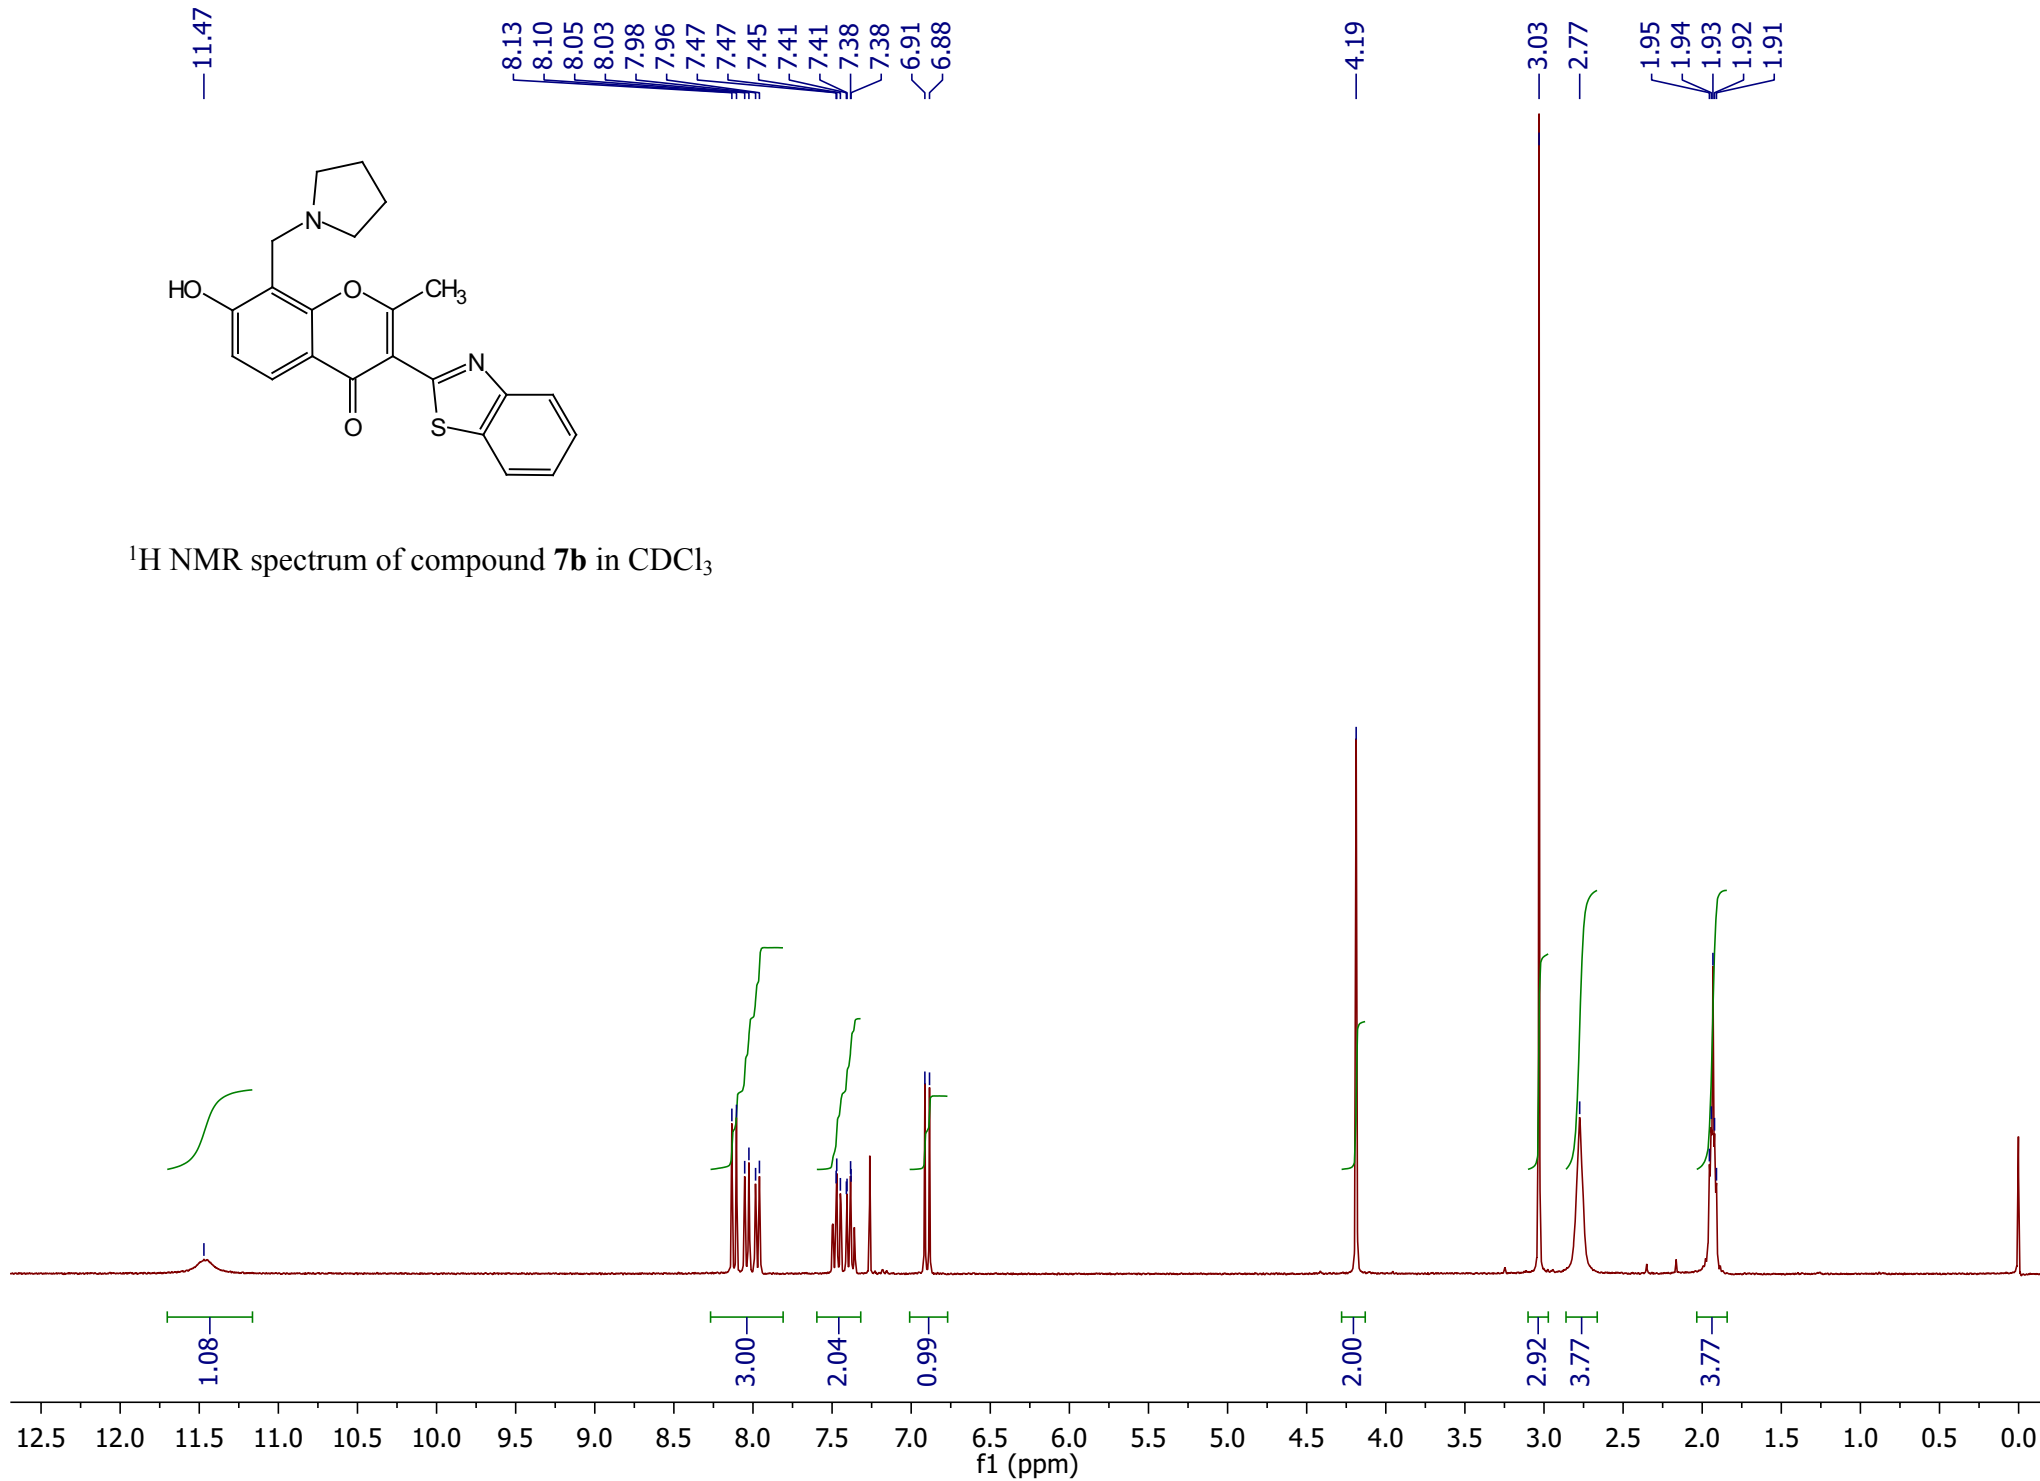



$^{13}\text{C}$  NMR spectrum of compound **7b** in  $\text{CDCl}_3$

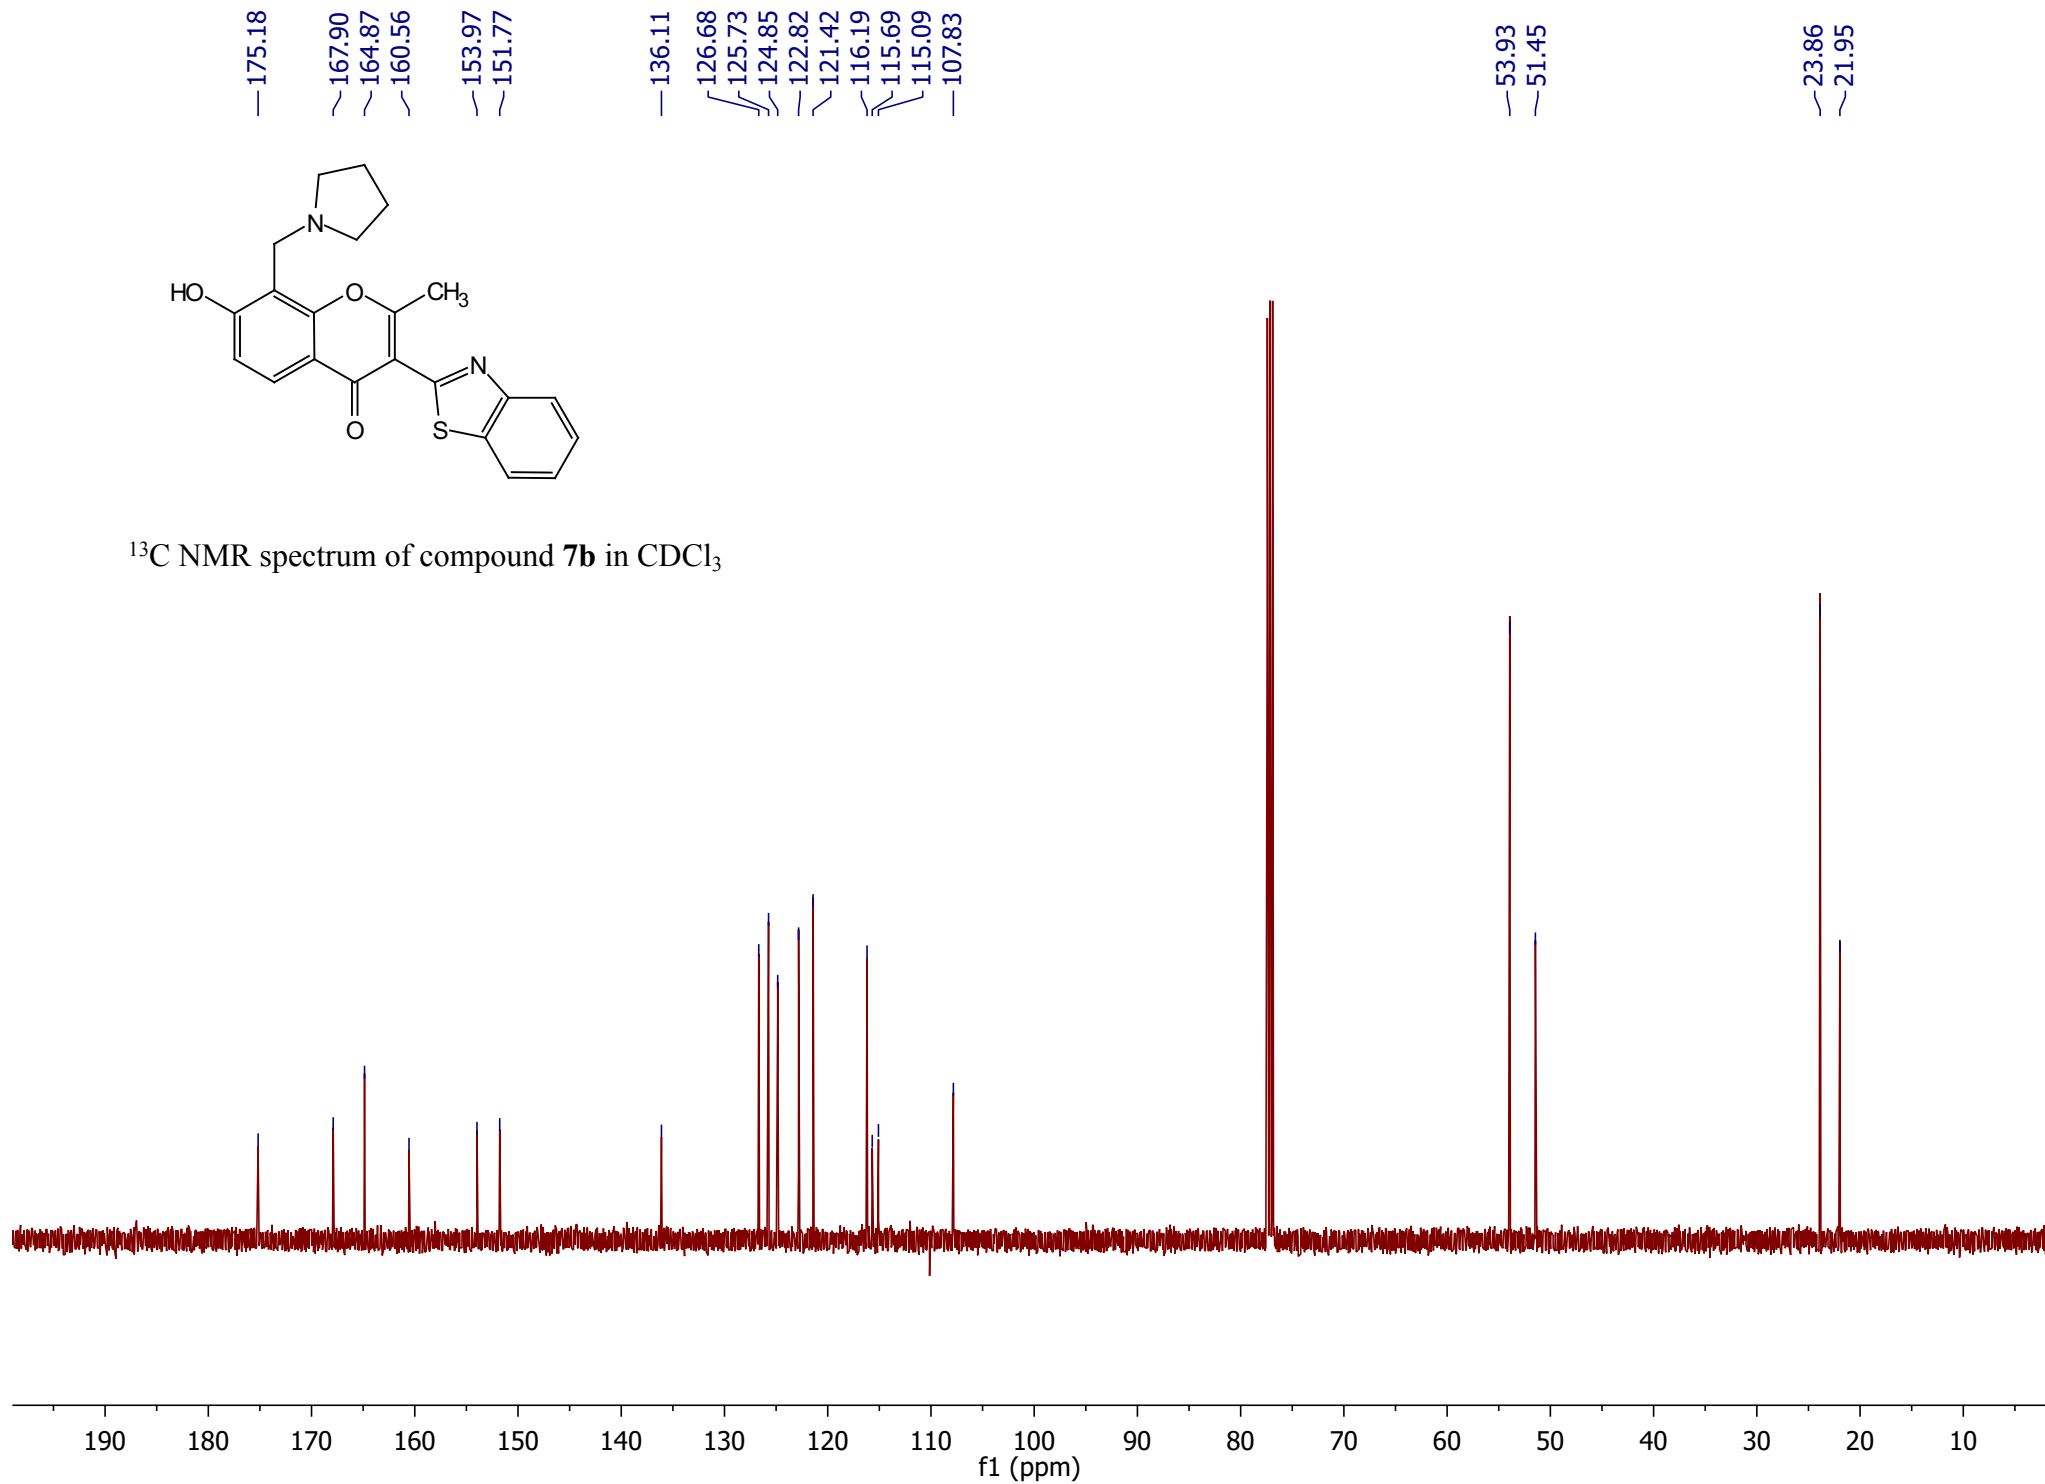

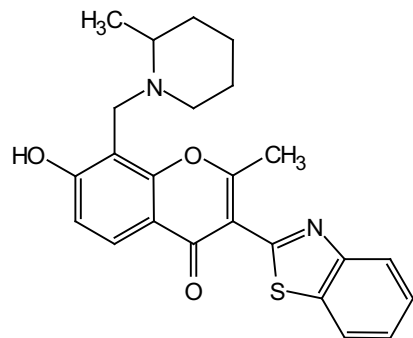

$^1\text{H}$  NMR spectrum of compound **7c** in  $\text{CDCl}_3$

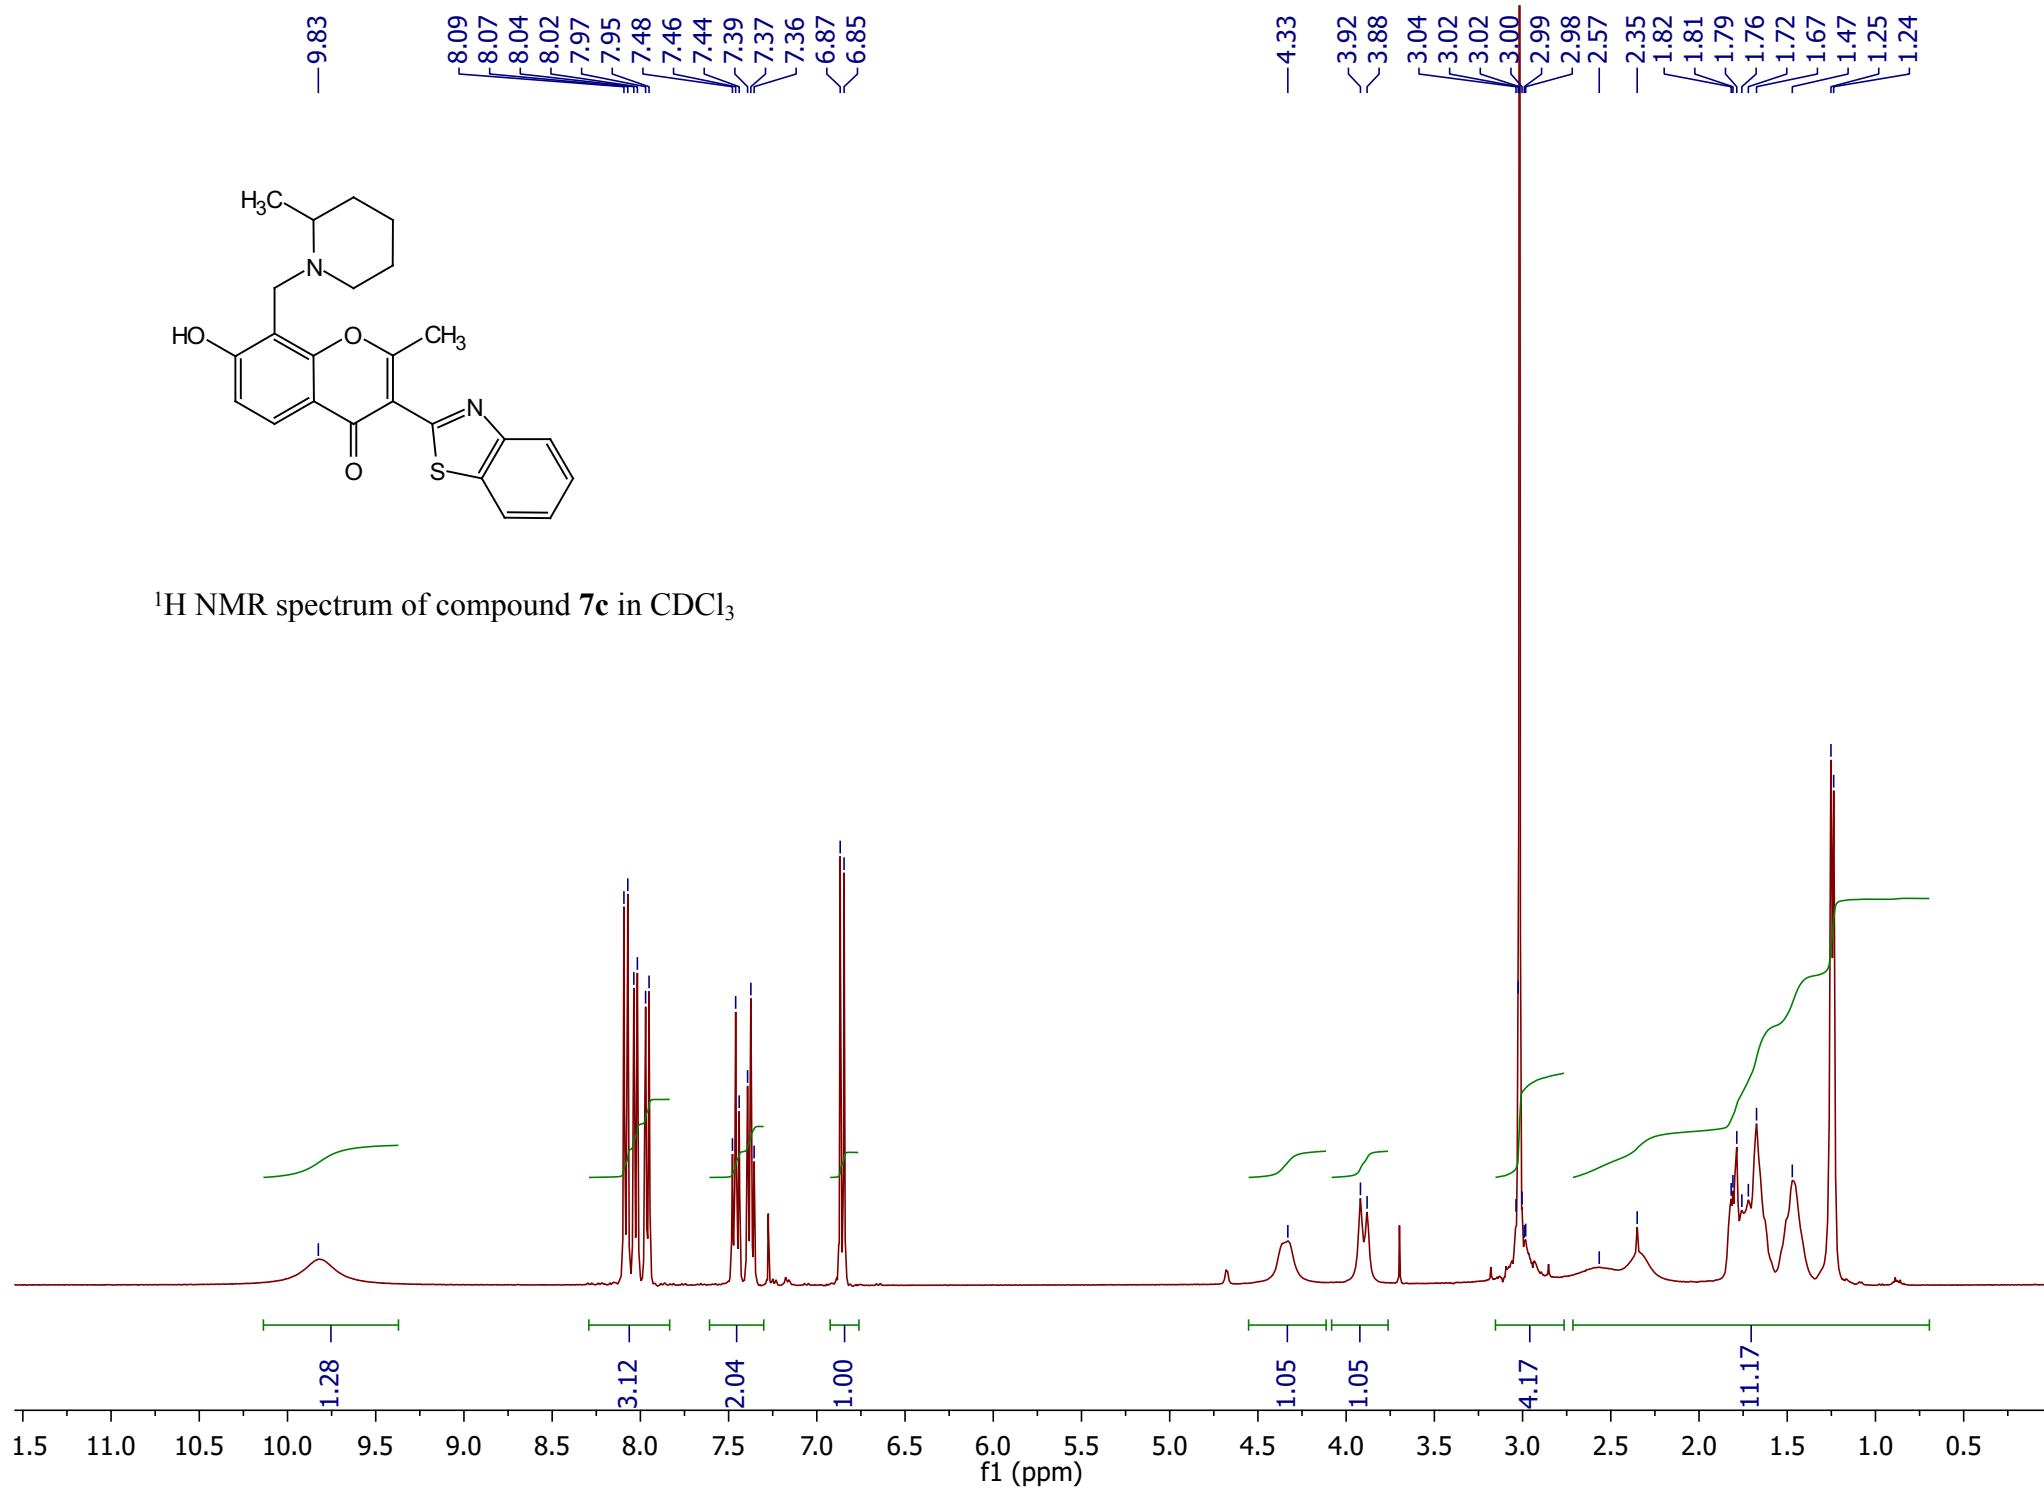

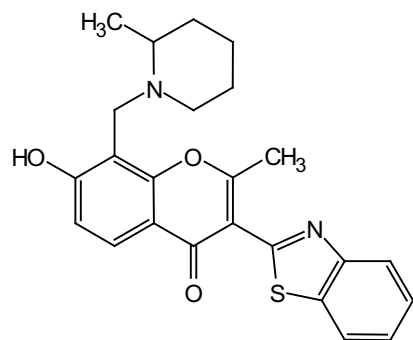

$^{13}\text{C}$  NMR spectrum of compound **7c** in  $\text{CDCl}_3$

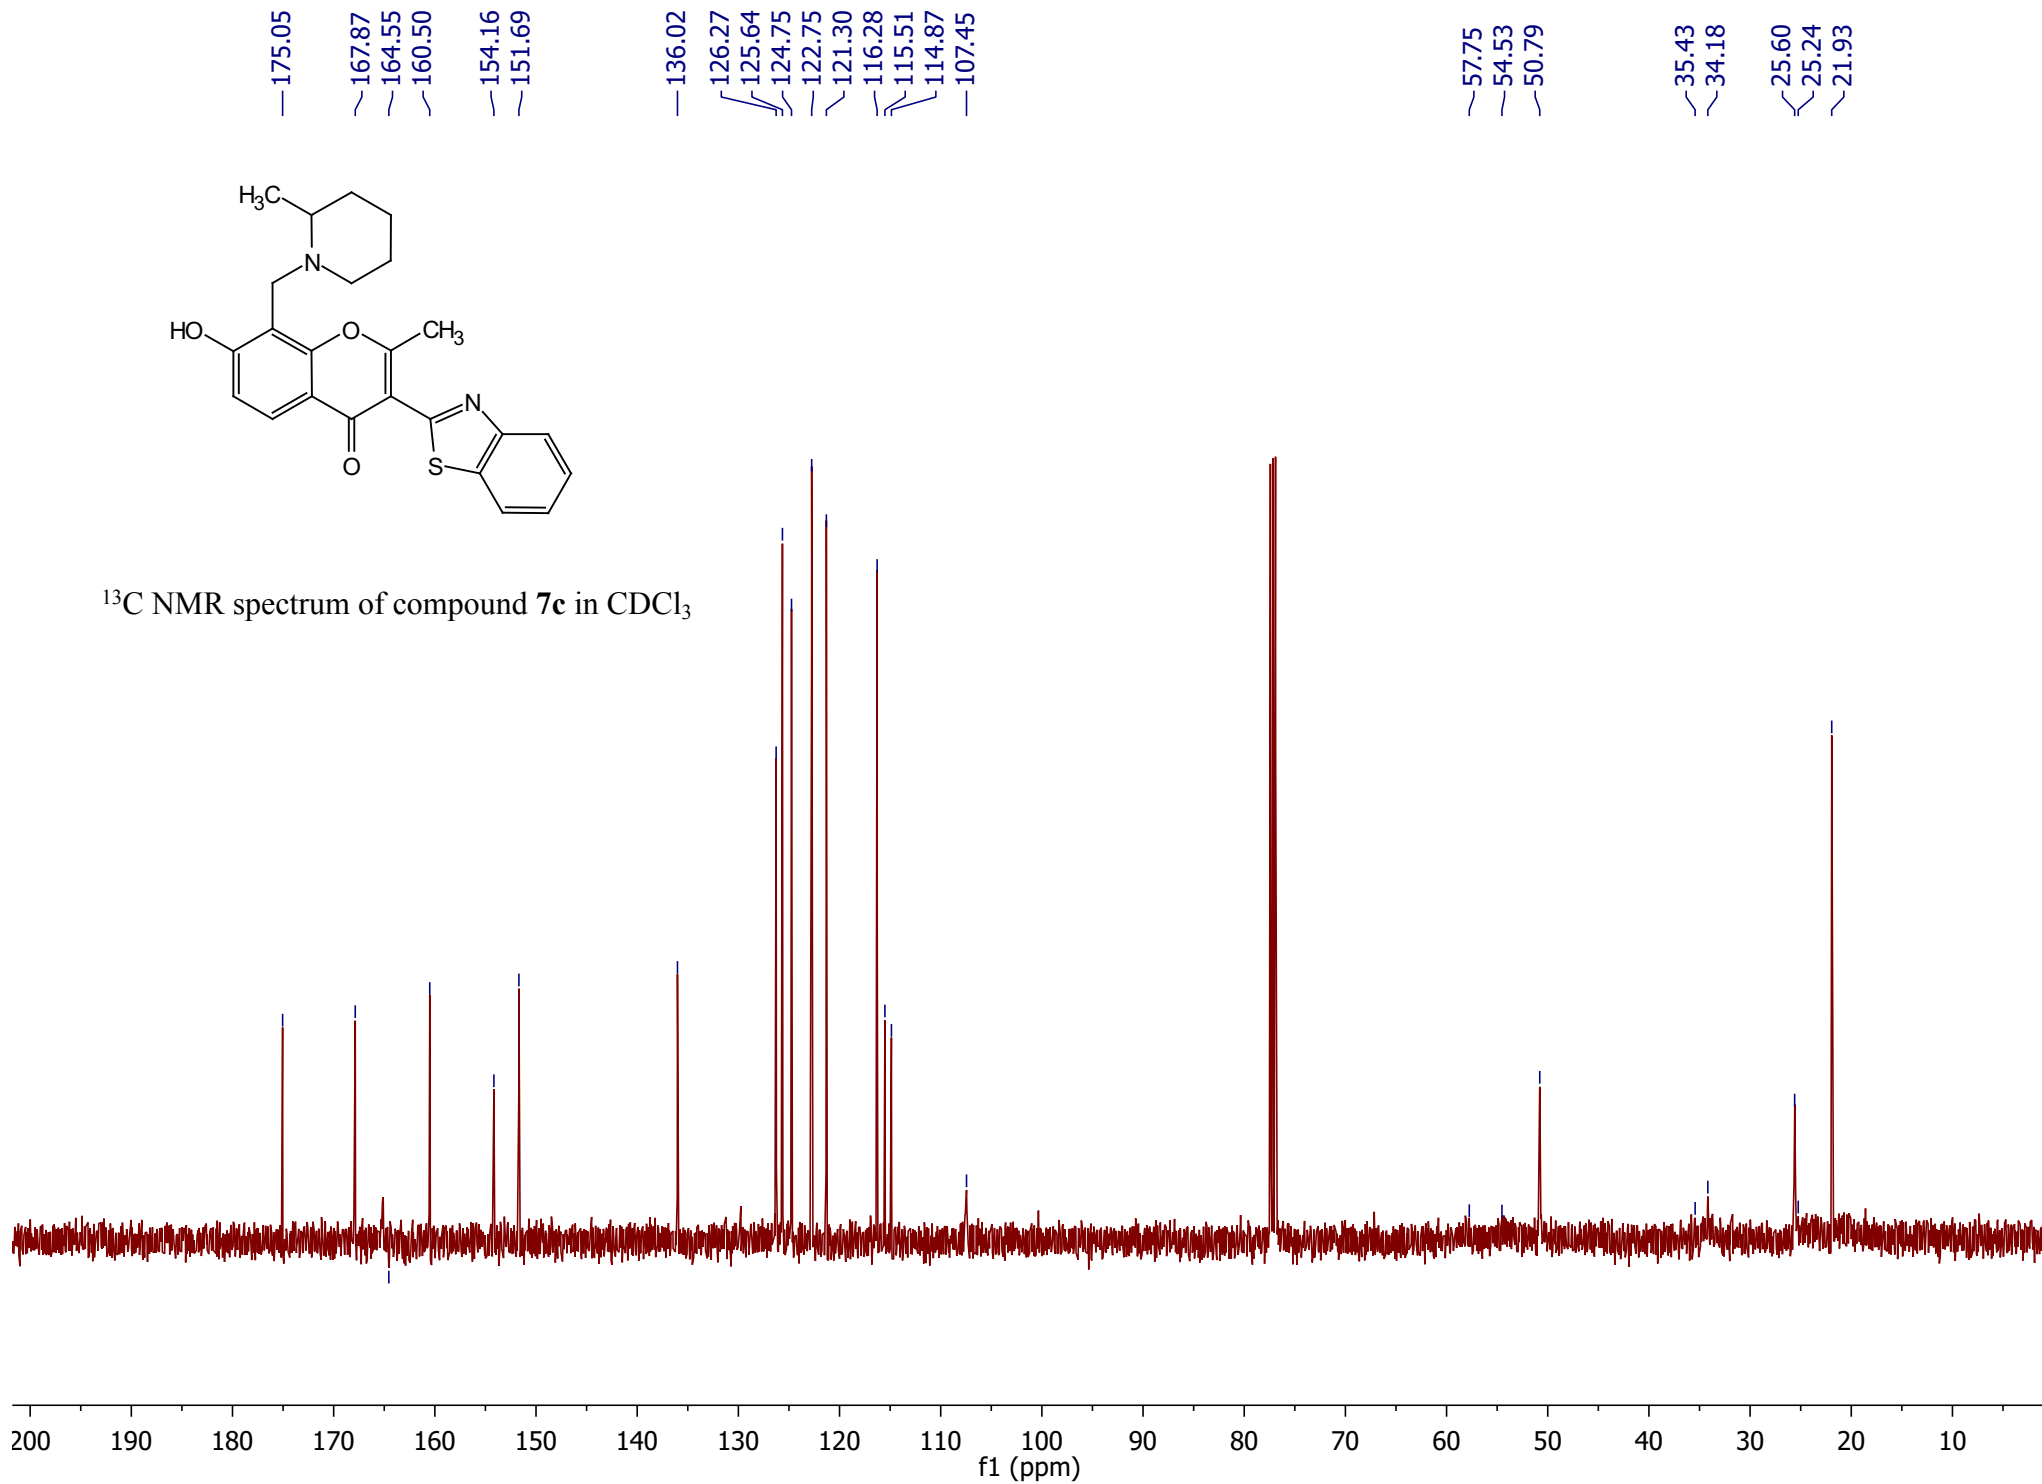

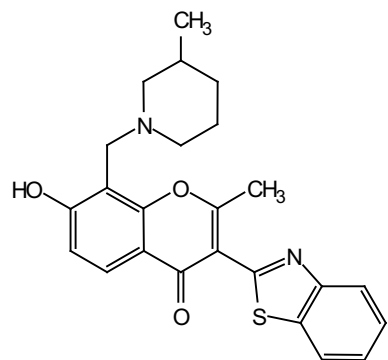

$^1\text{H}$  NMR spectrum of compound **7d** in  $\text{CDCl}_3$

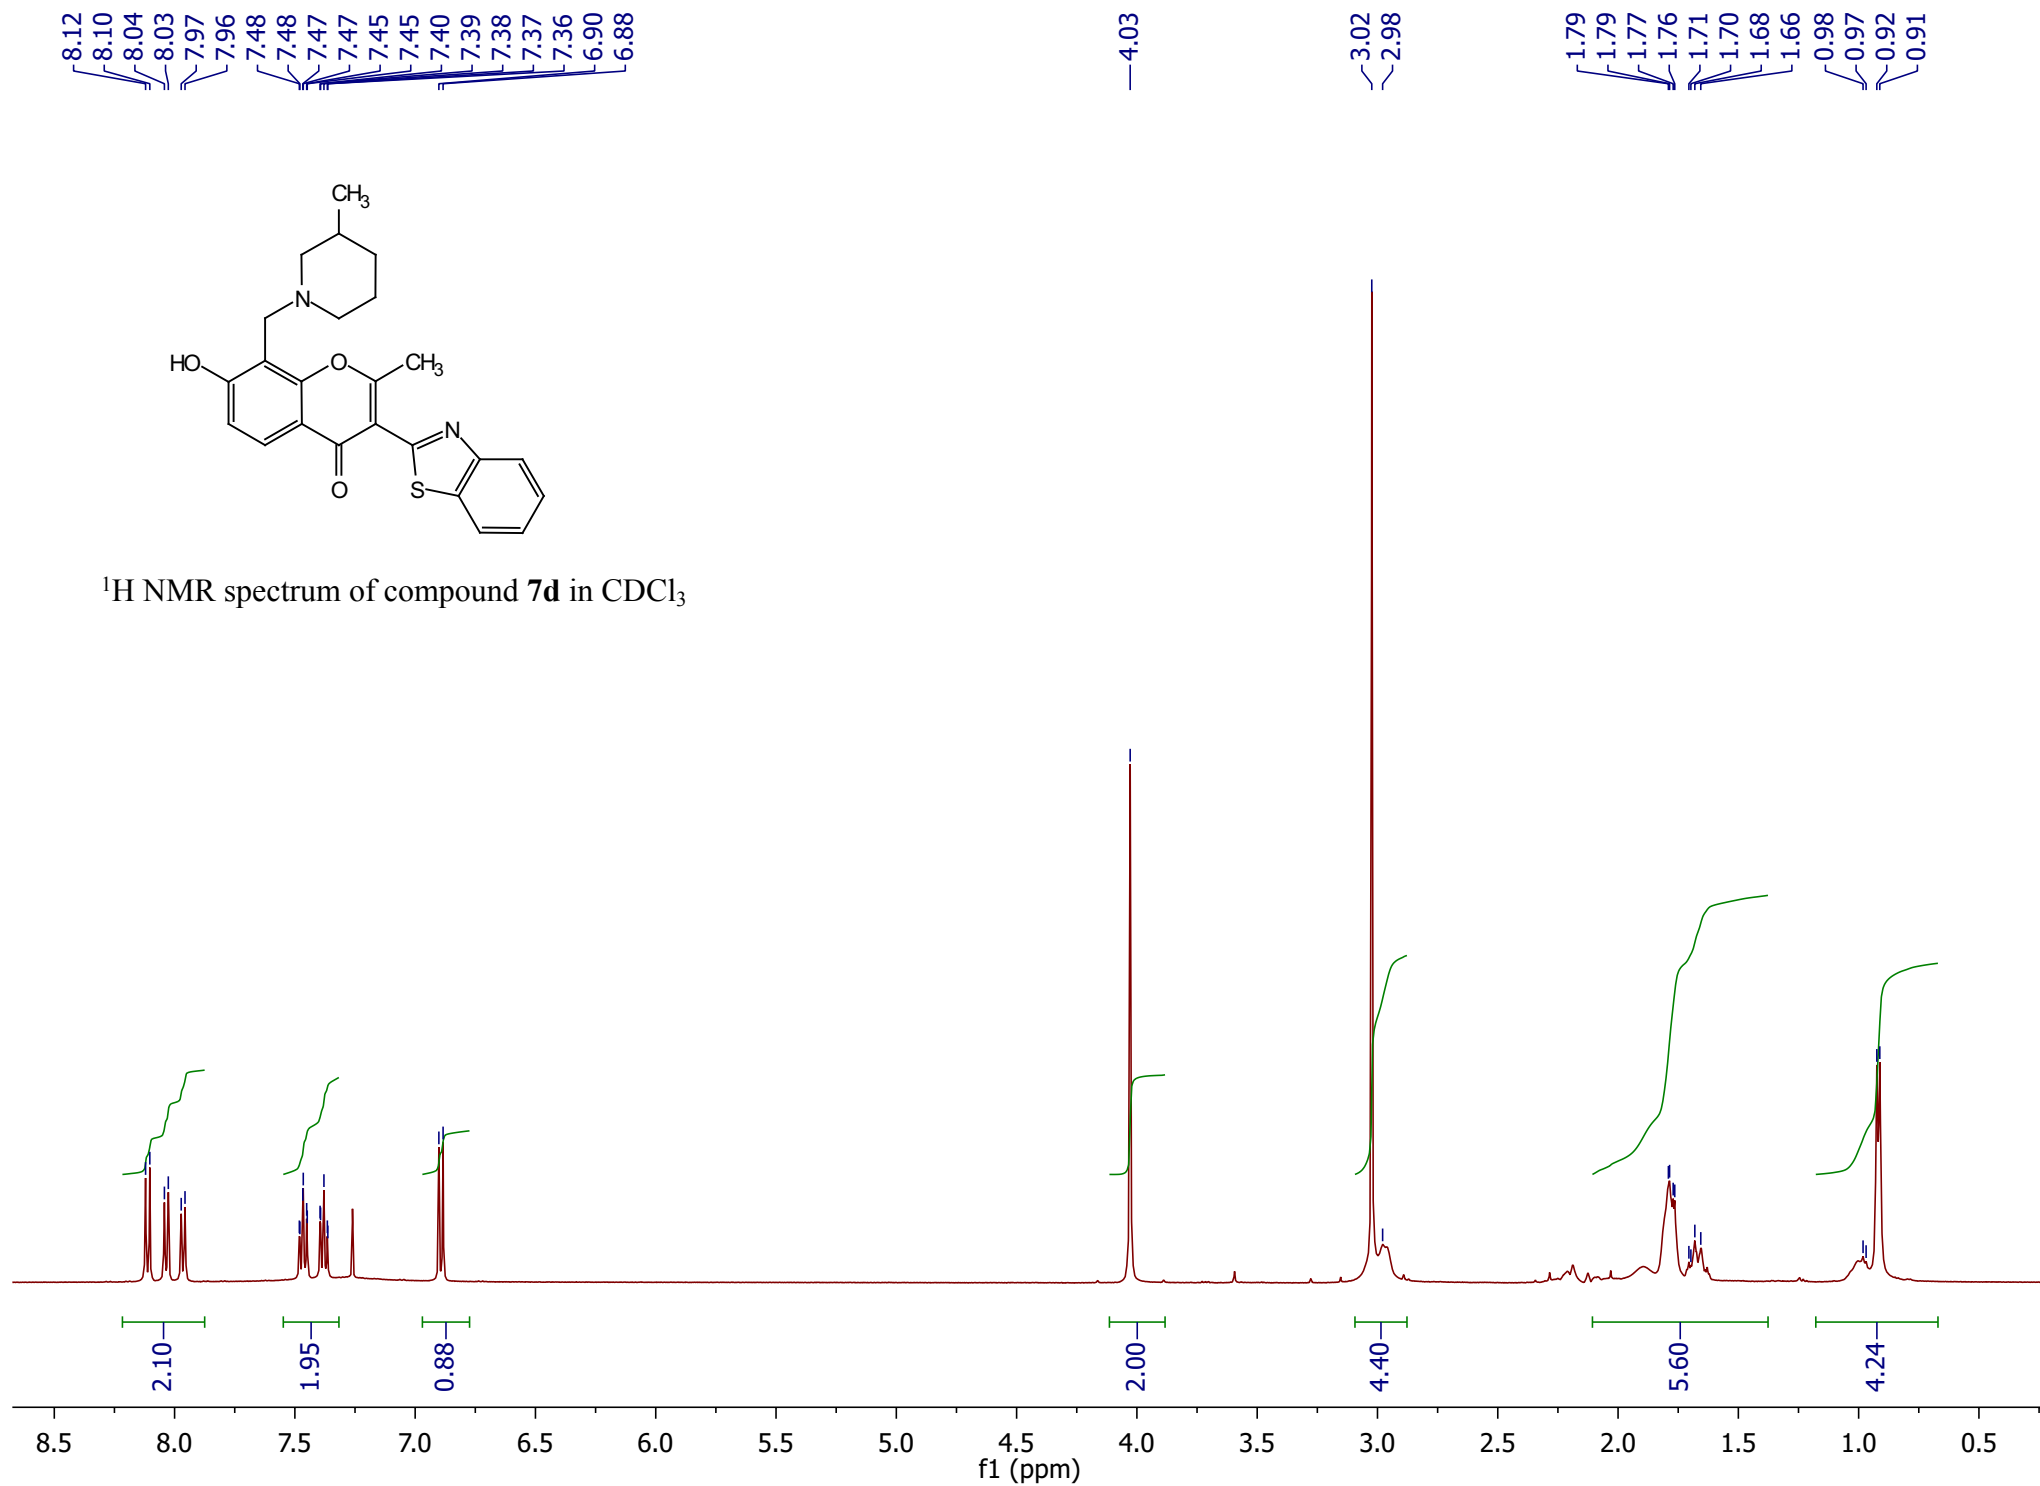



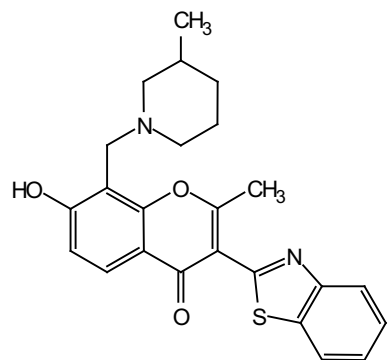

$^{13}\text{C}$  NMR spectrum of compound **7d** in  $\text{CDCl}_3$

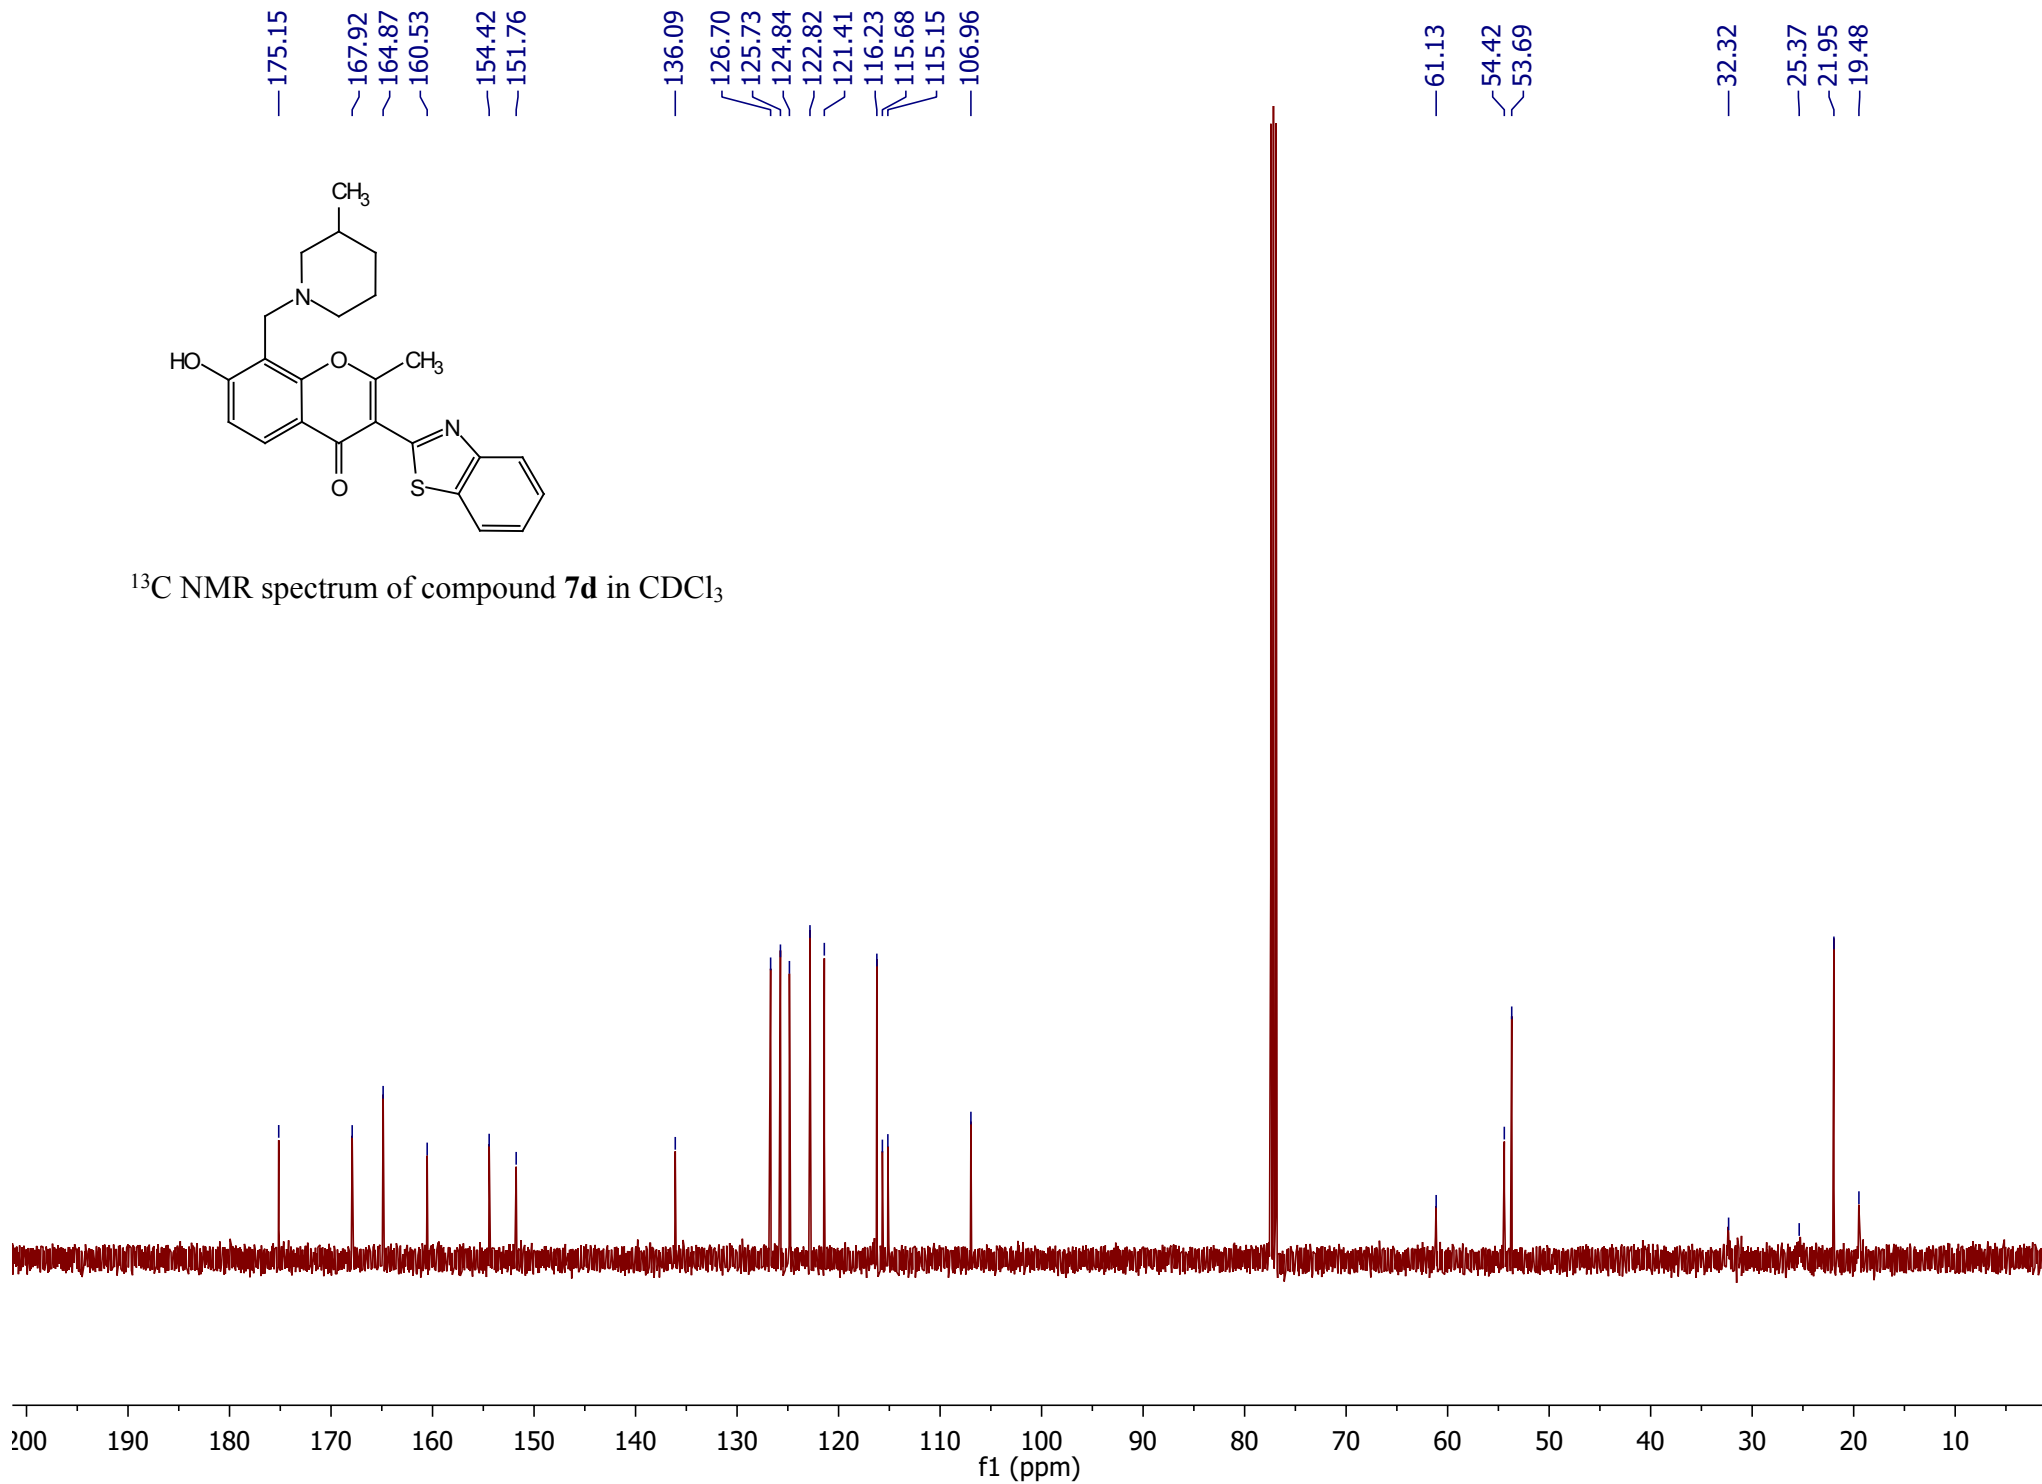

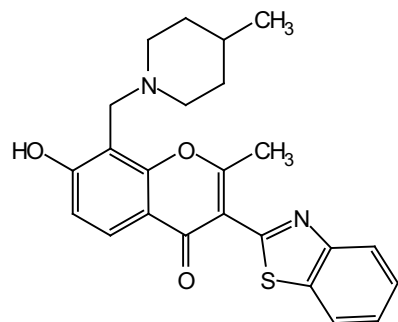

$^1\text{H}$  NMR spectrum of compound **7e** in  $\text{CDCl}_3$

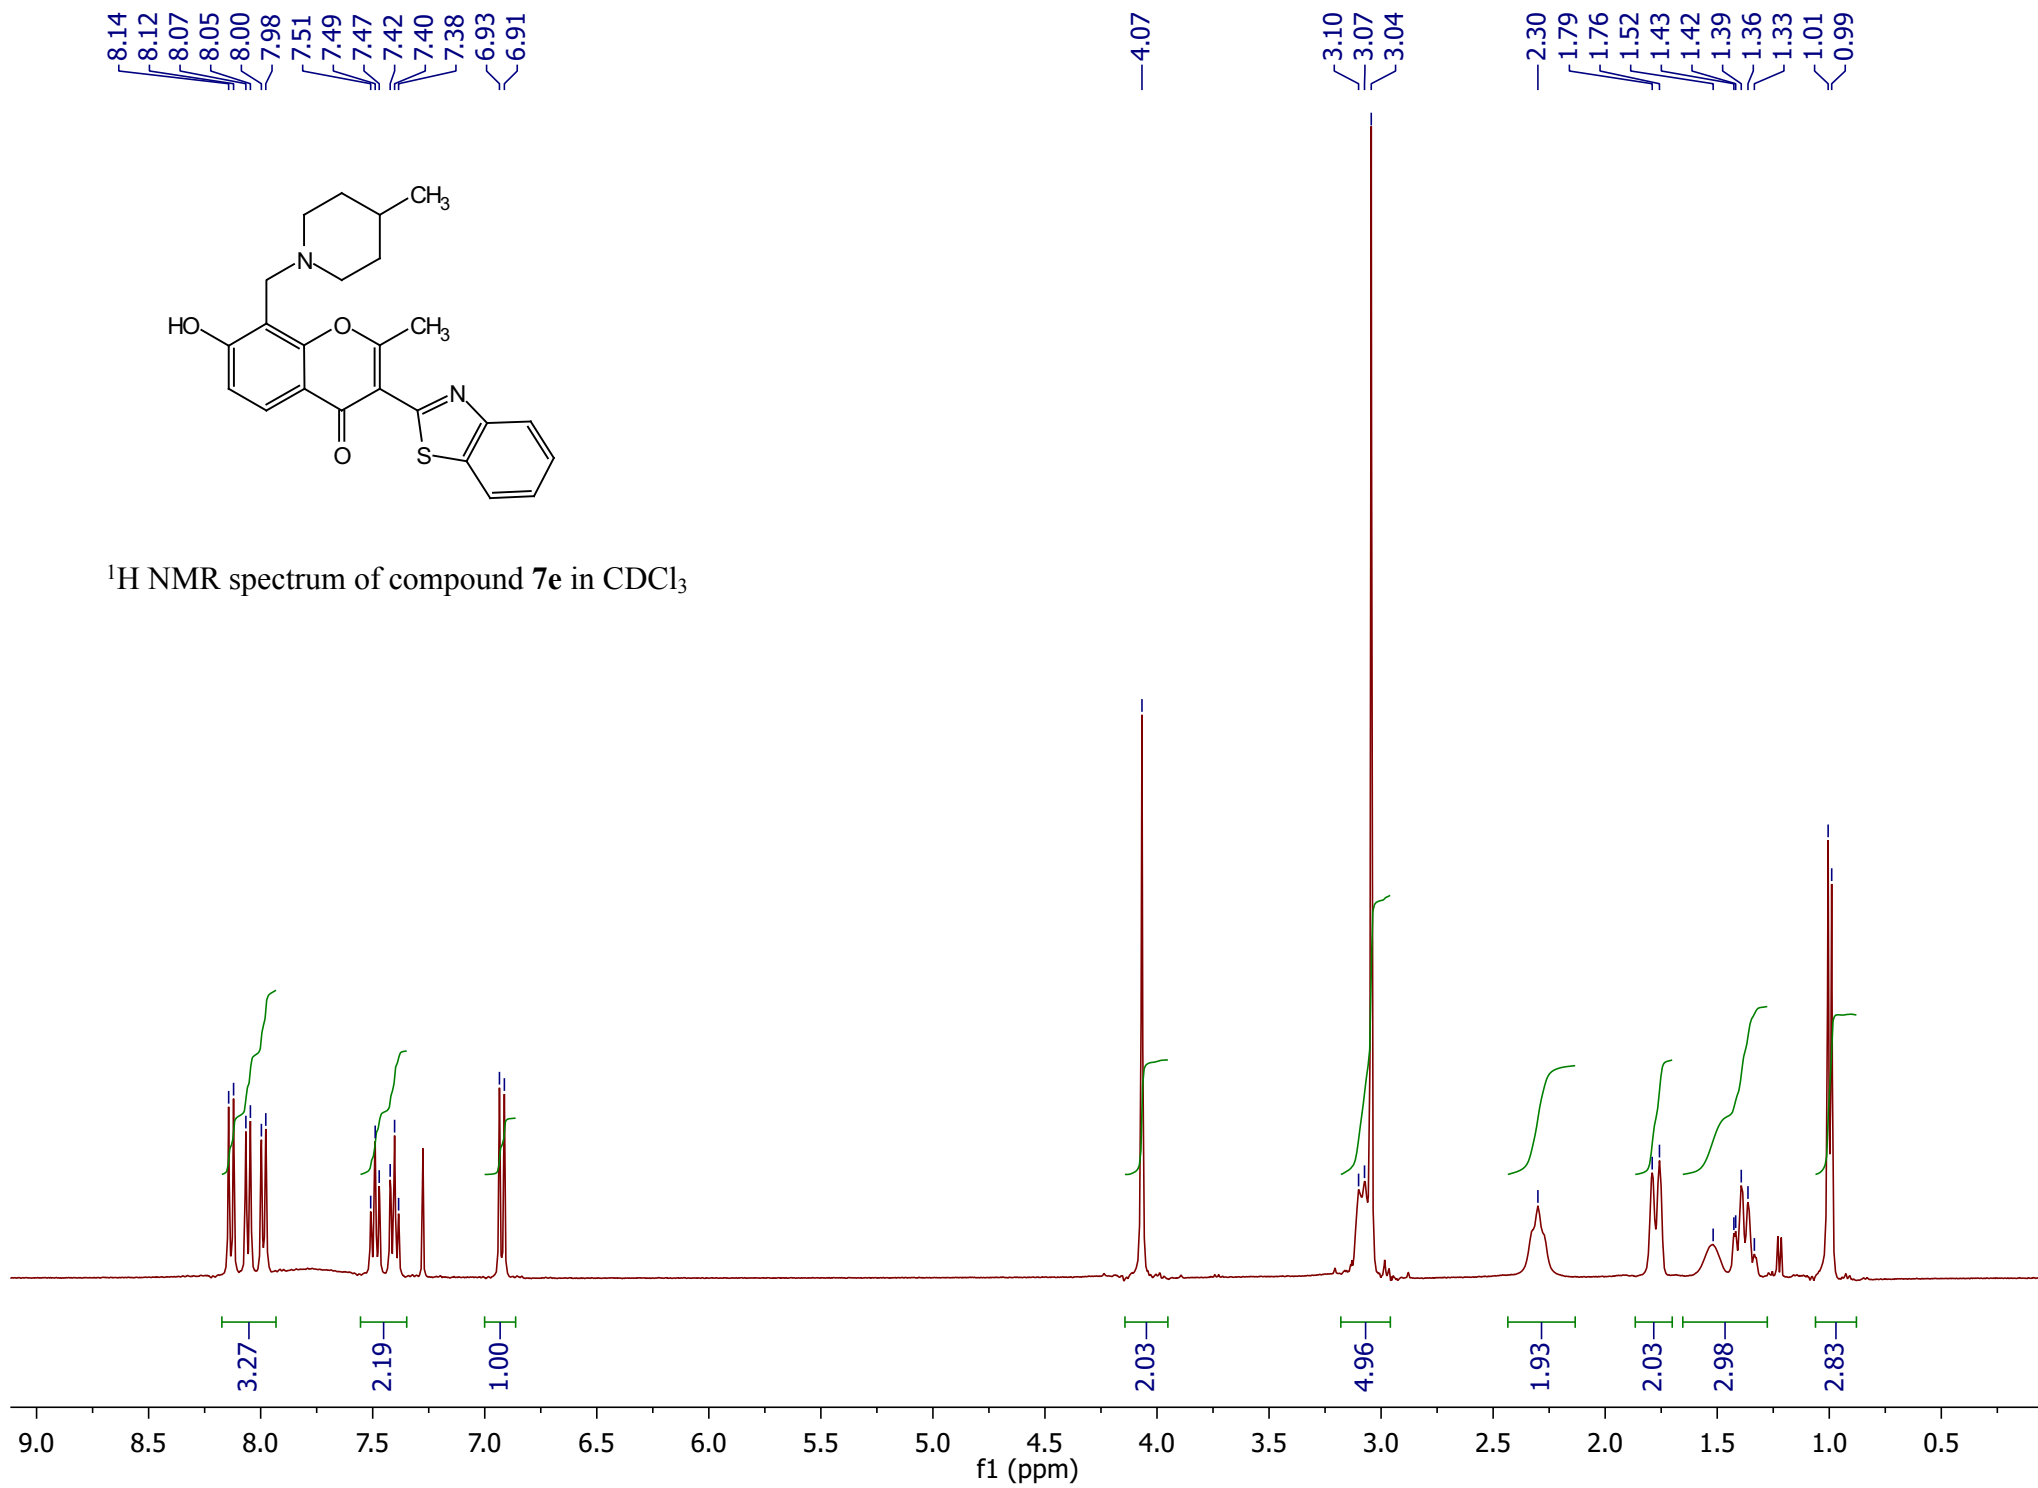



$^{13}\text{C}$  NMR spectrum of compound **7e** in  $\text{CDCl}_3$

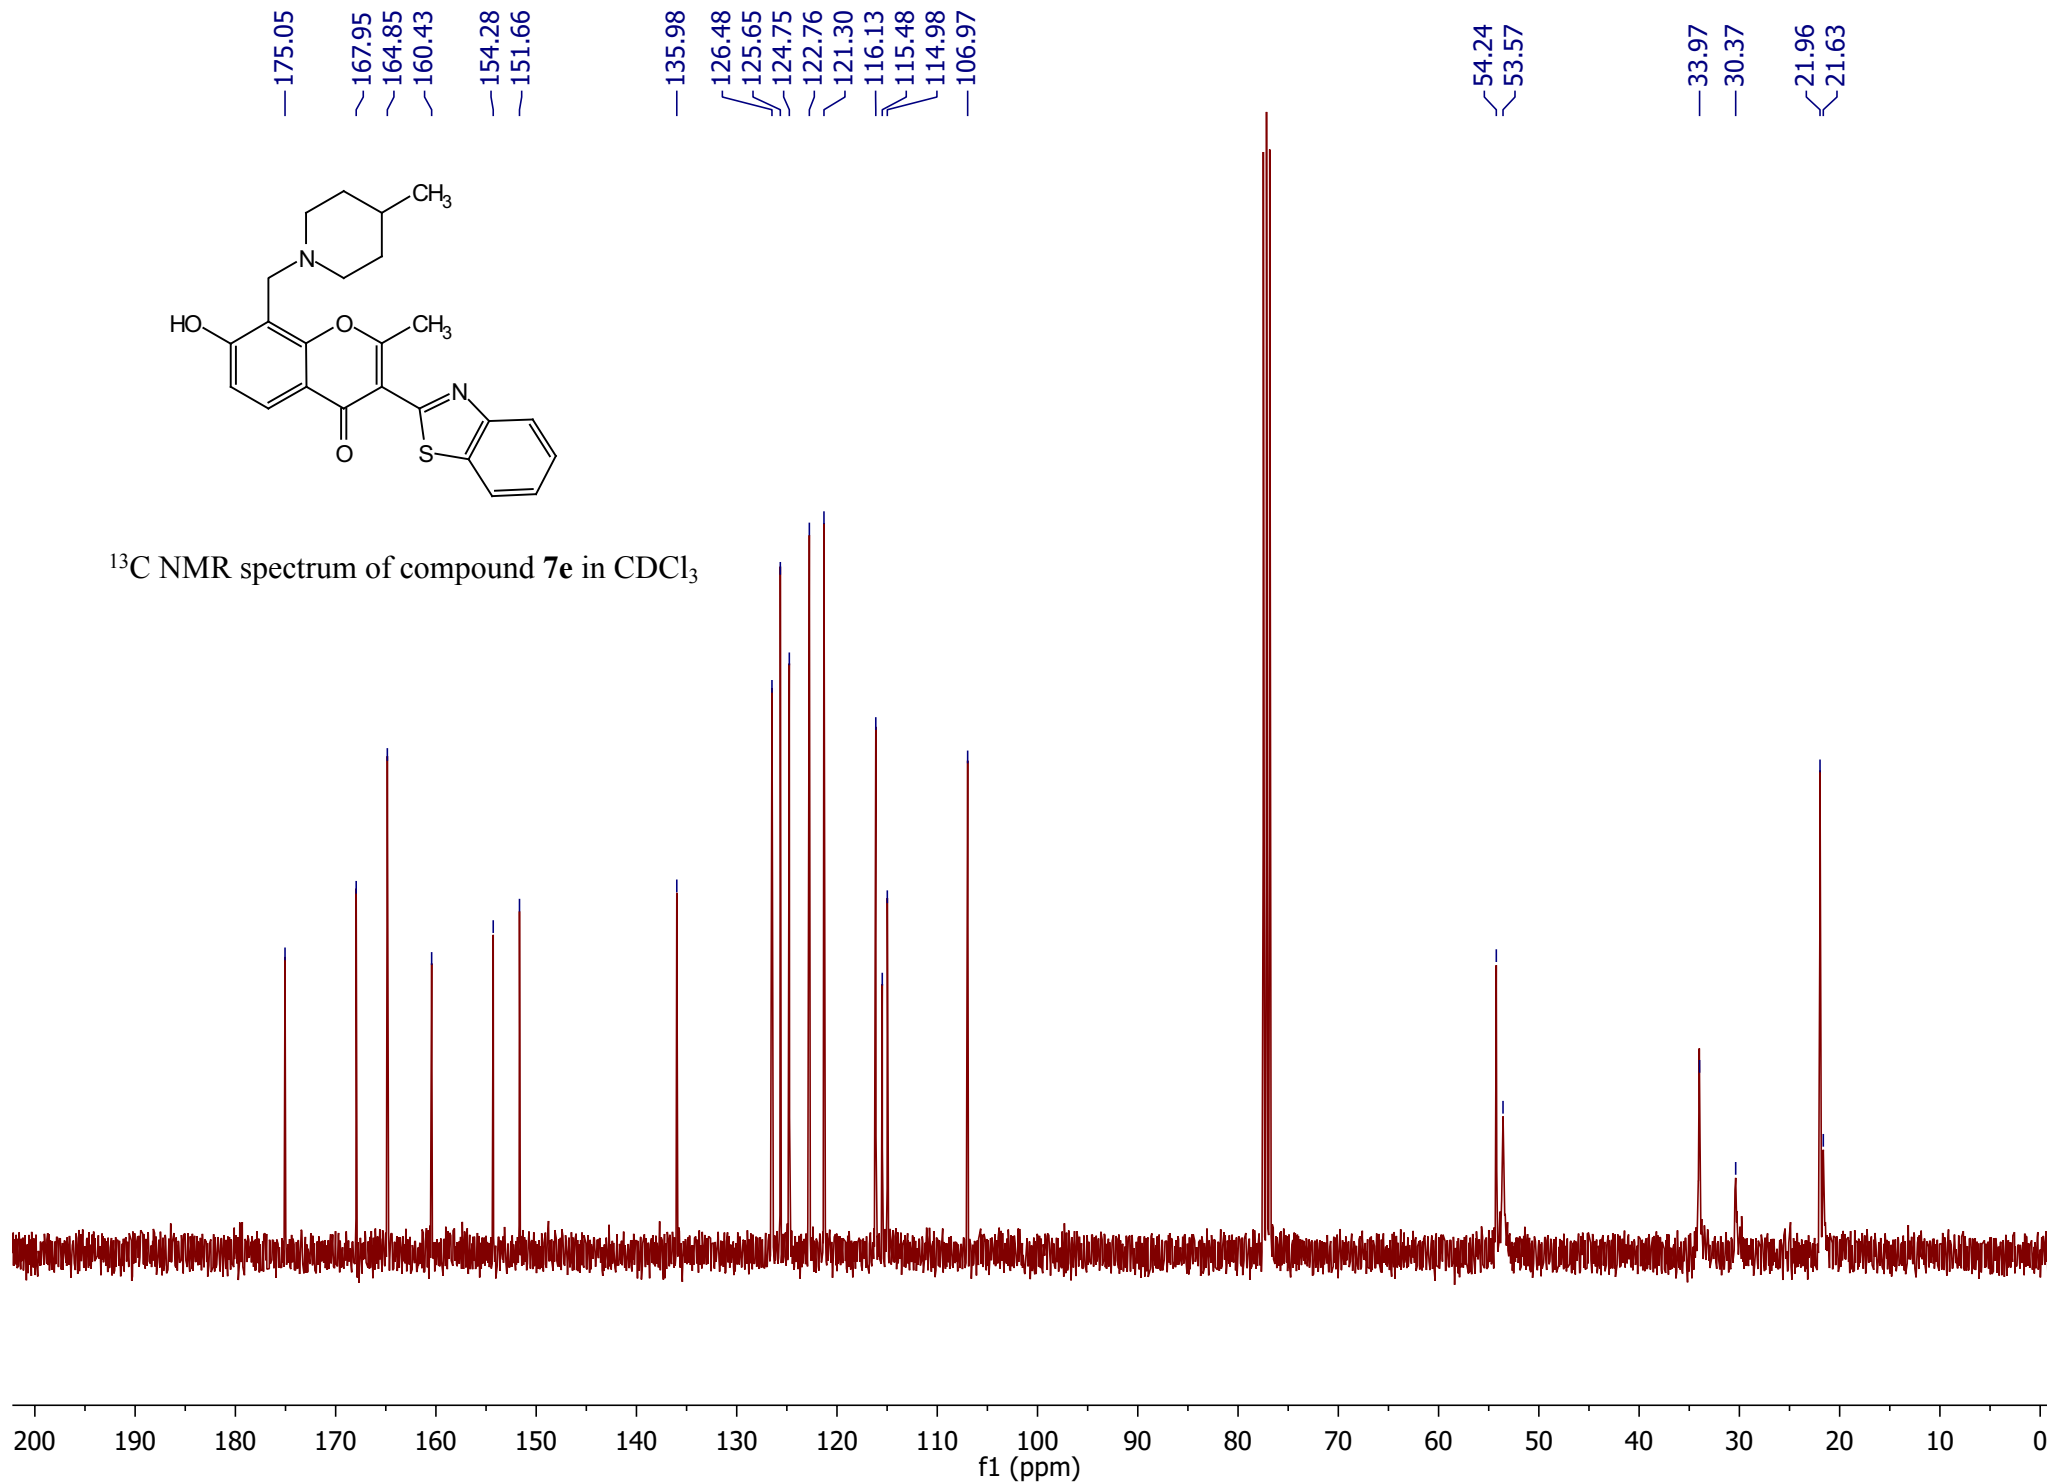

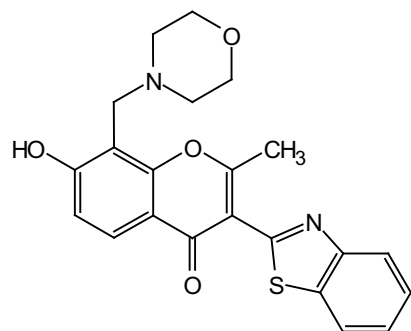

$^1\text{H}$  NMR spectrum of compound **7f** in  $\text{CDCl}_3$

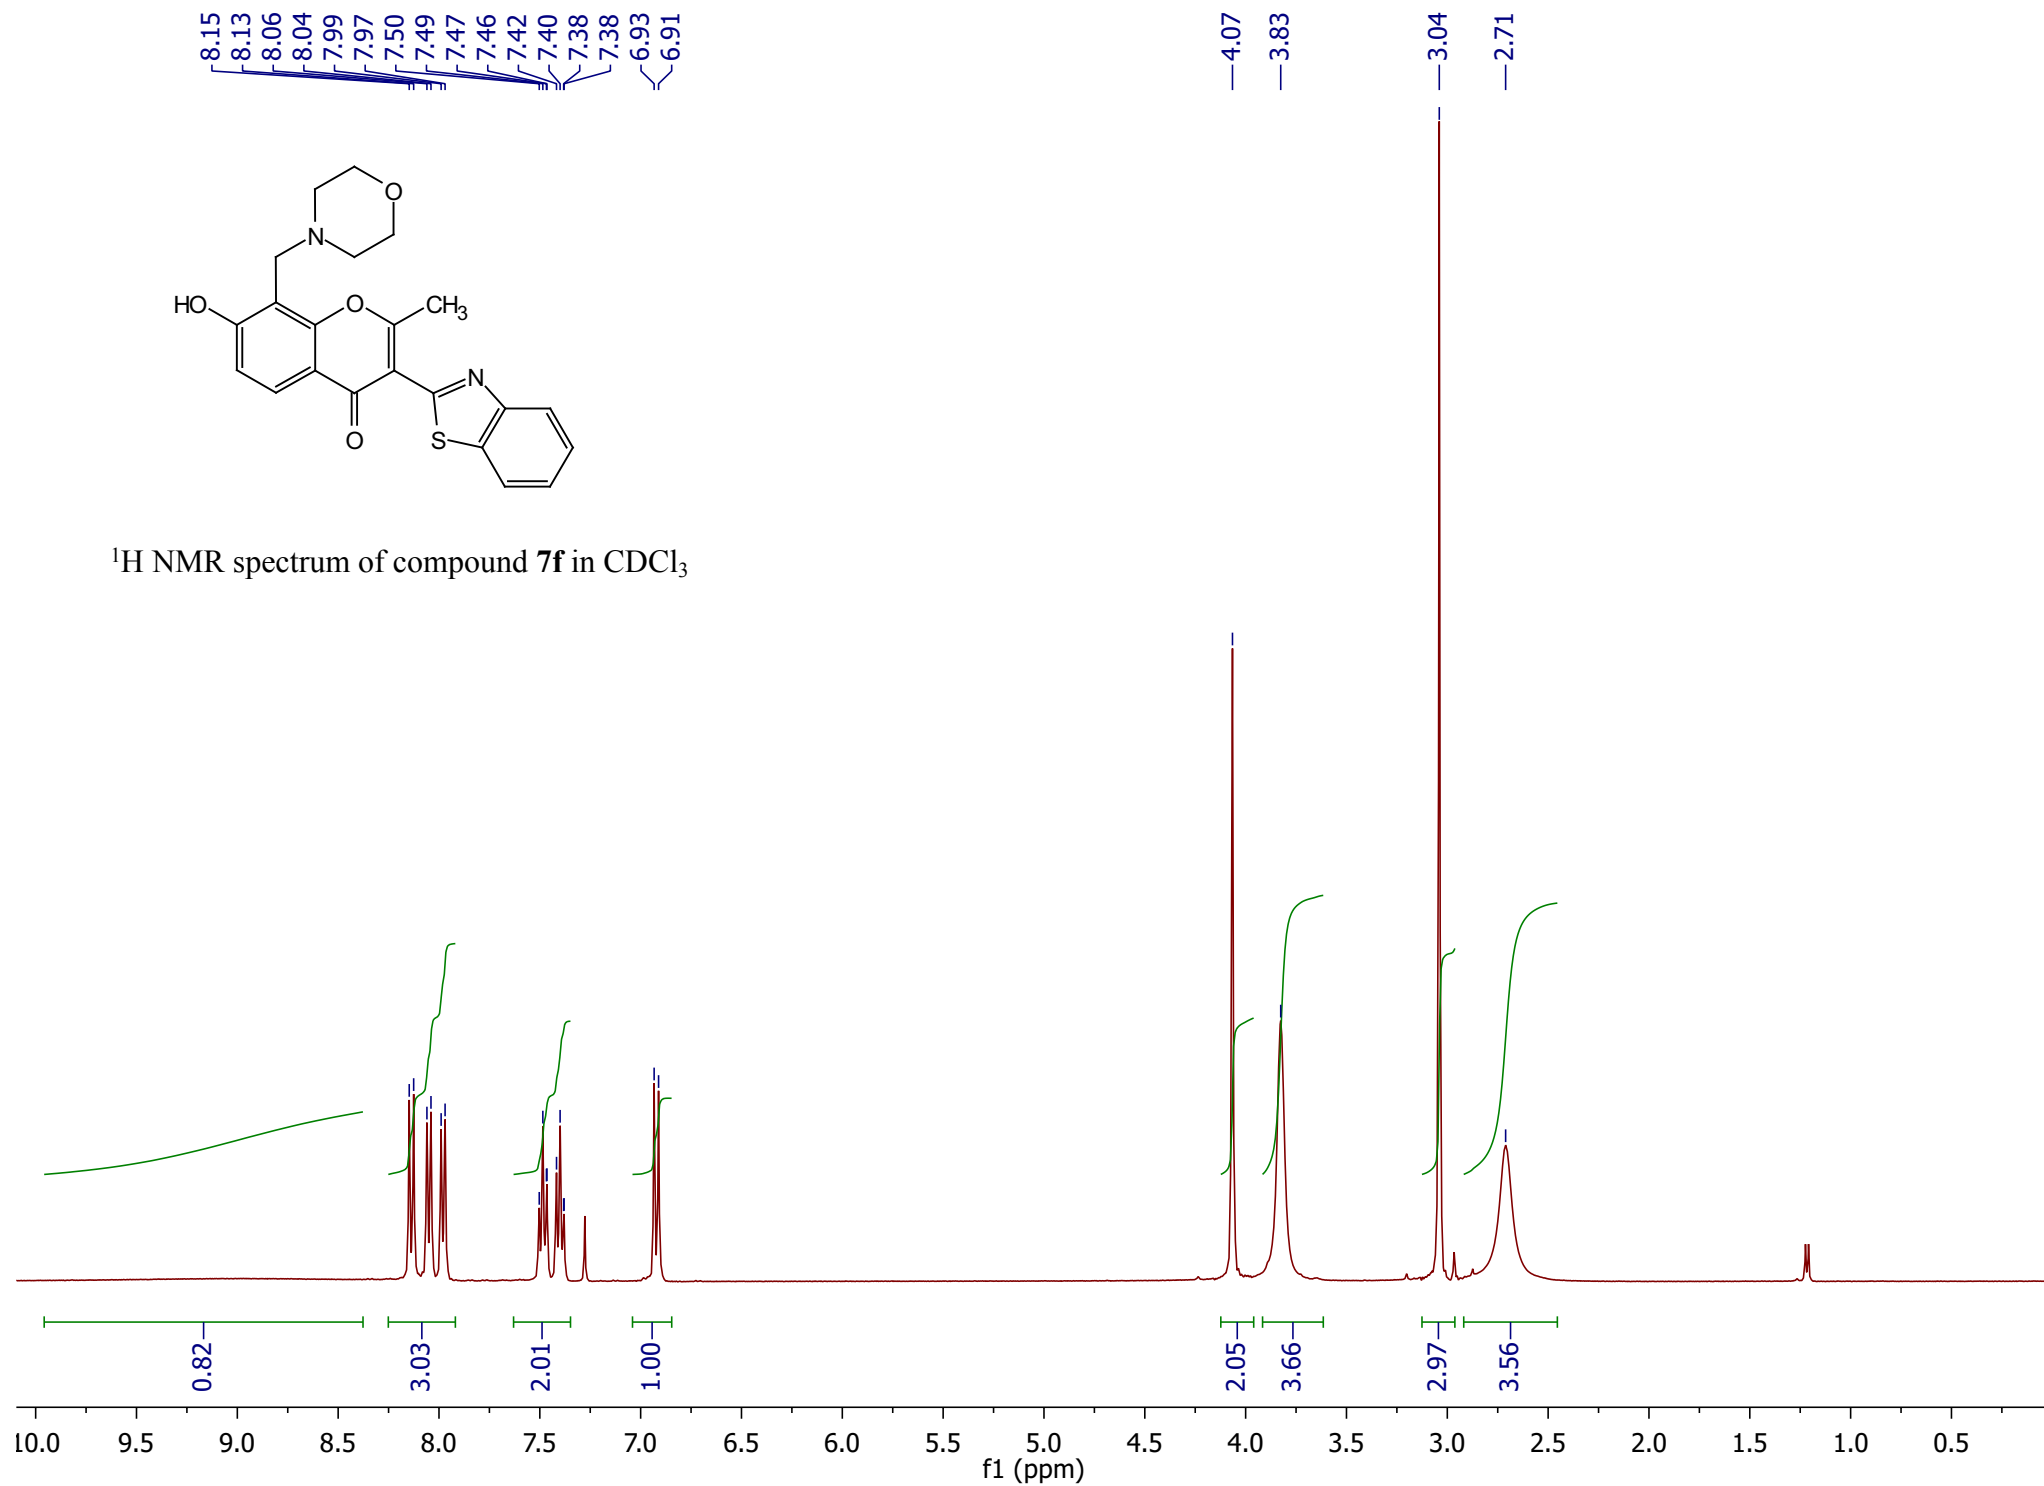



$^{13}\text{C}$  NMR spectrum of compound **7f** in  $\text{CDCl}_3$

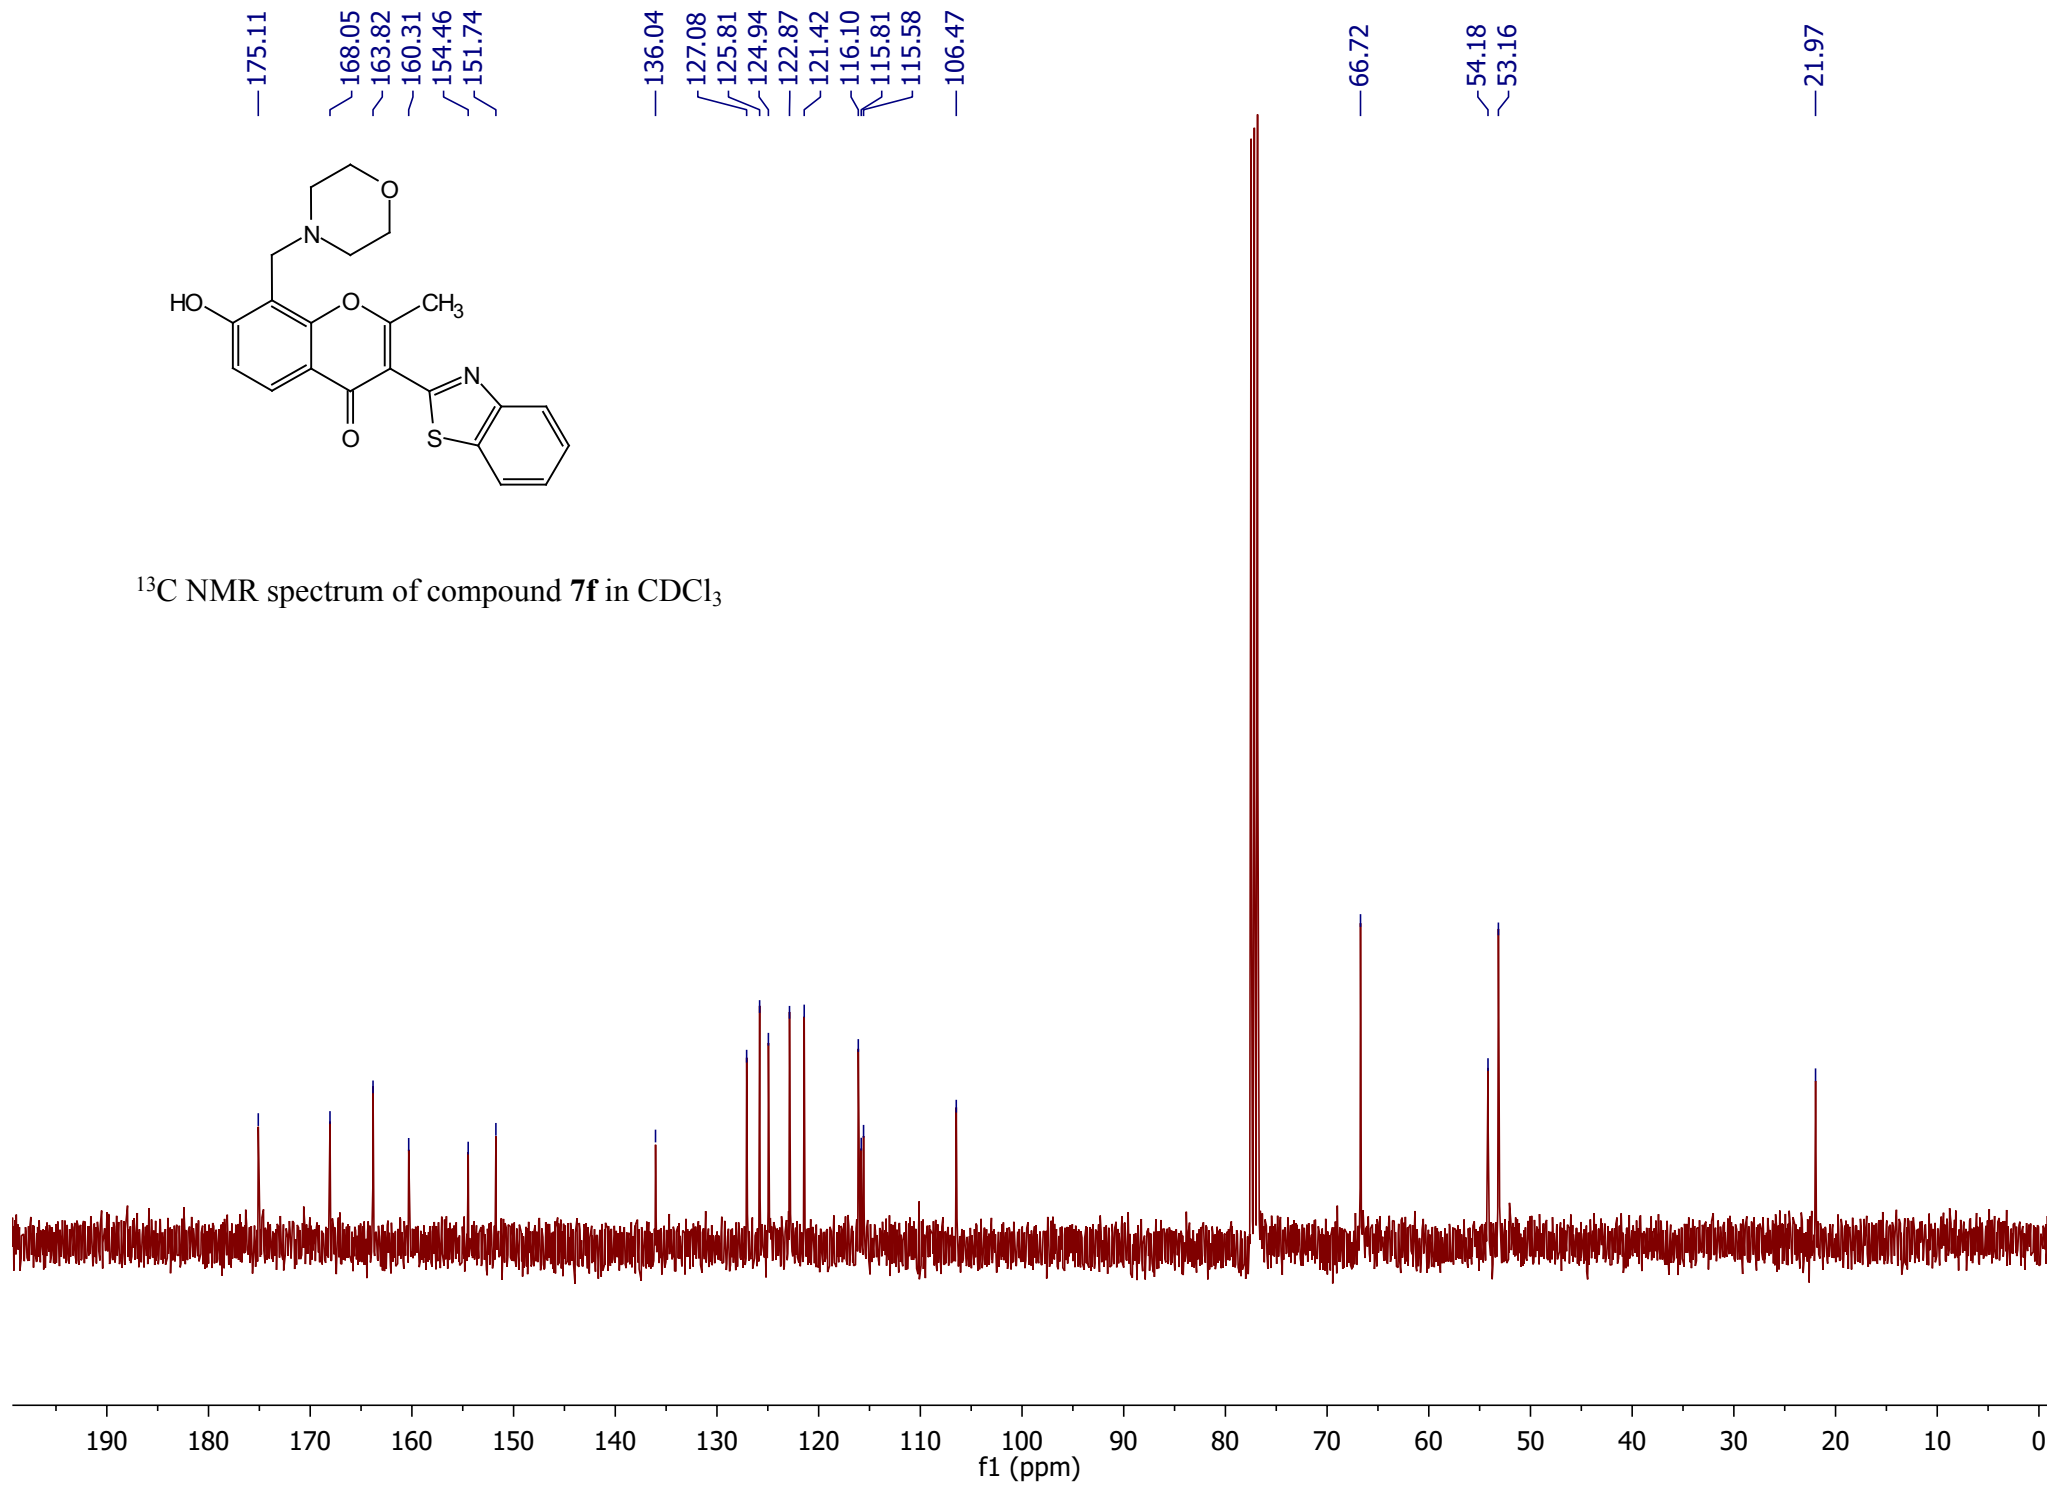

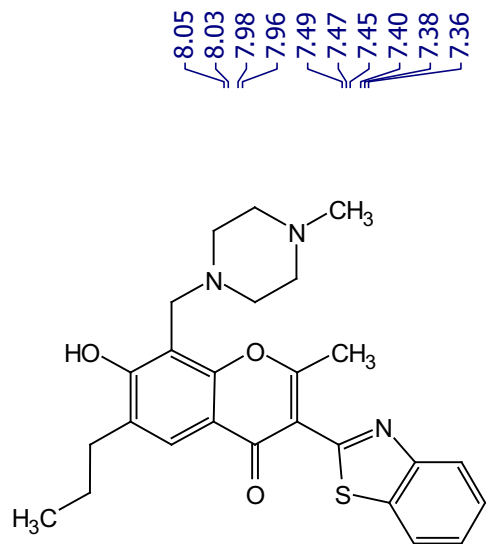

<sup>1</sup>H NMR spectrum of compound **7g** in CDCl<sub>3</sub>

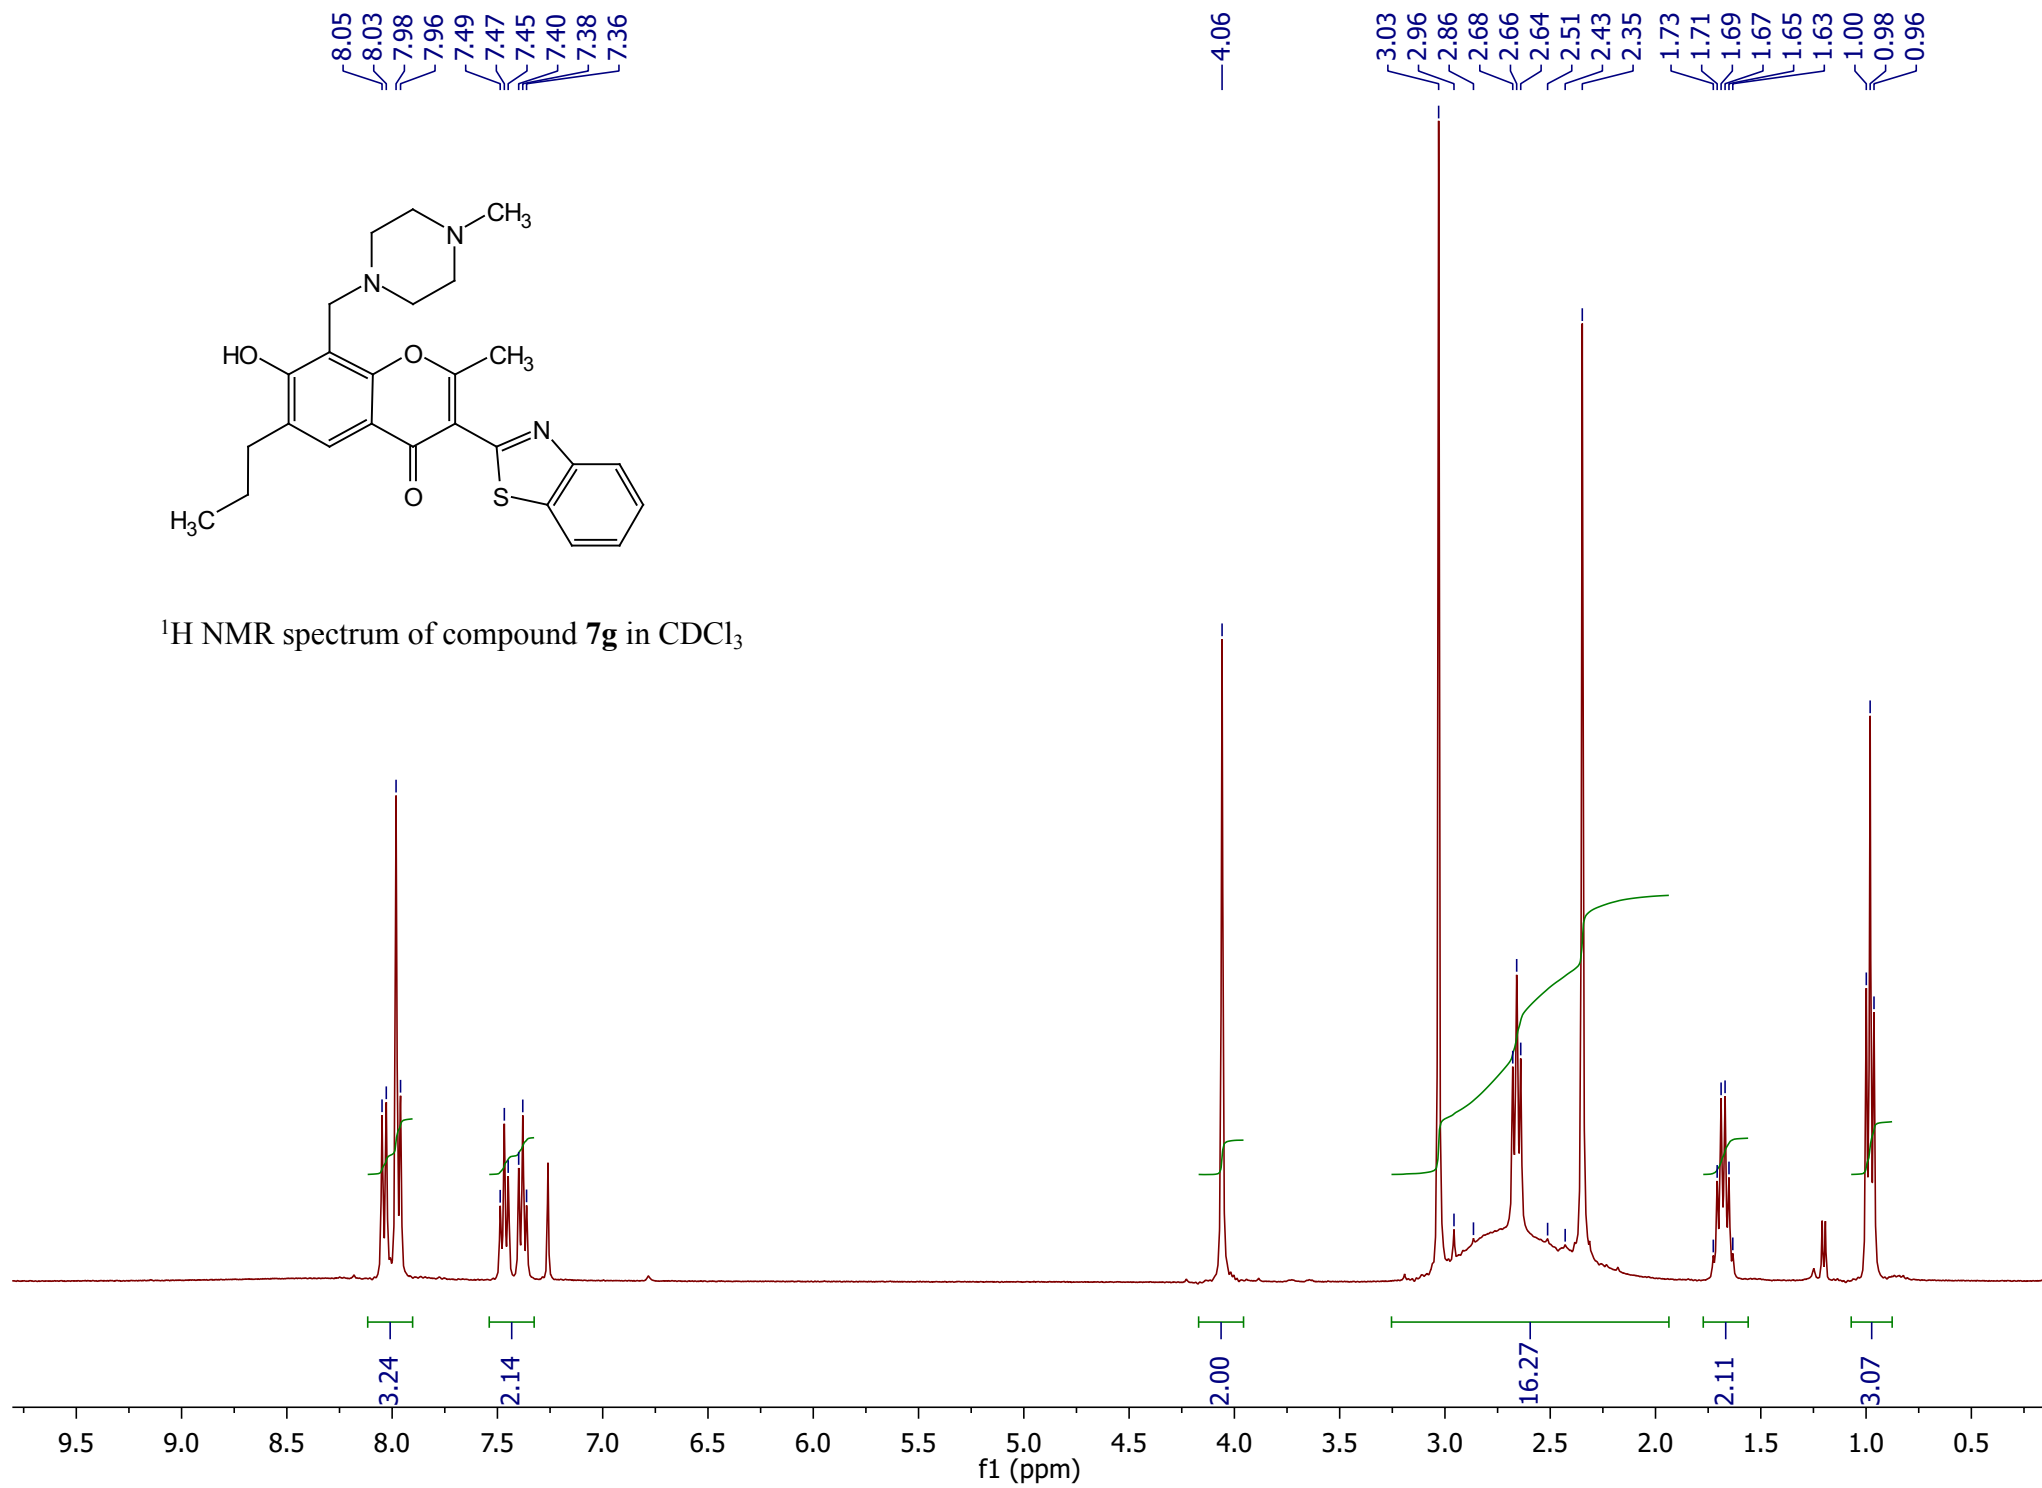

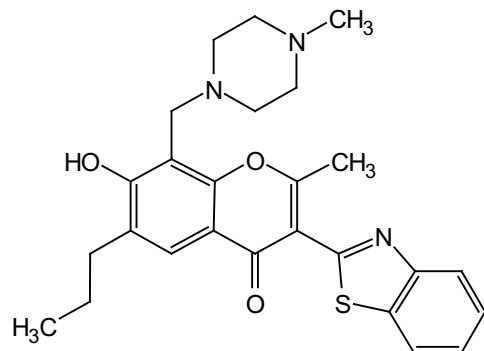

$^{13}\text{C}$  NMR spectrum of compound **7g** in  $\text{CDCl}_3$

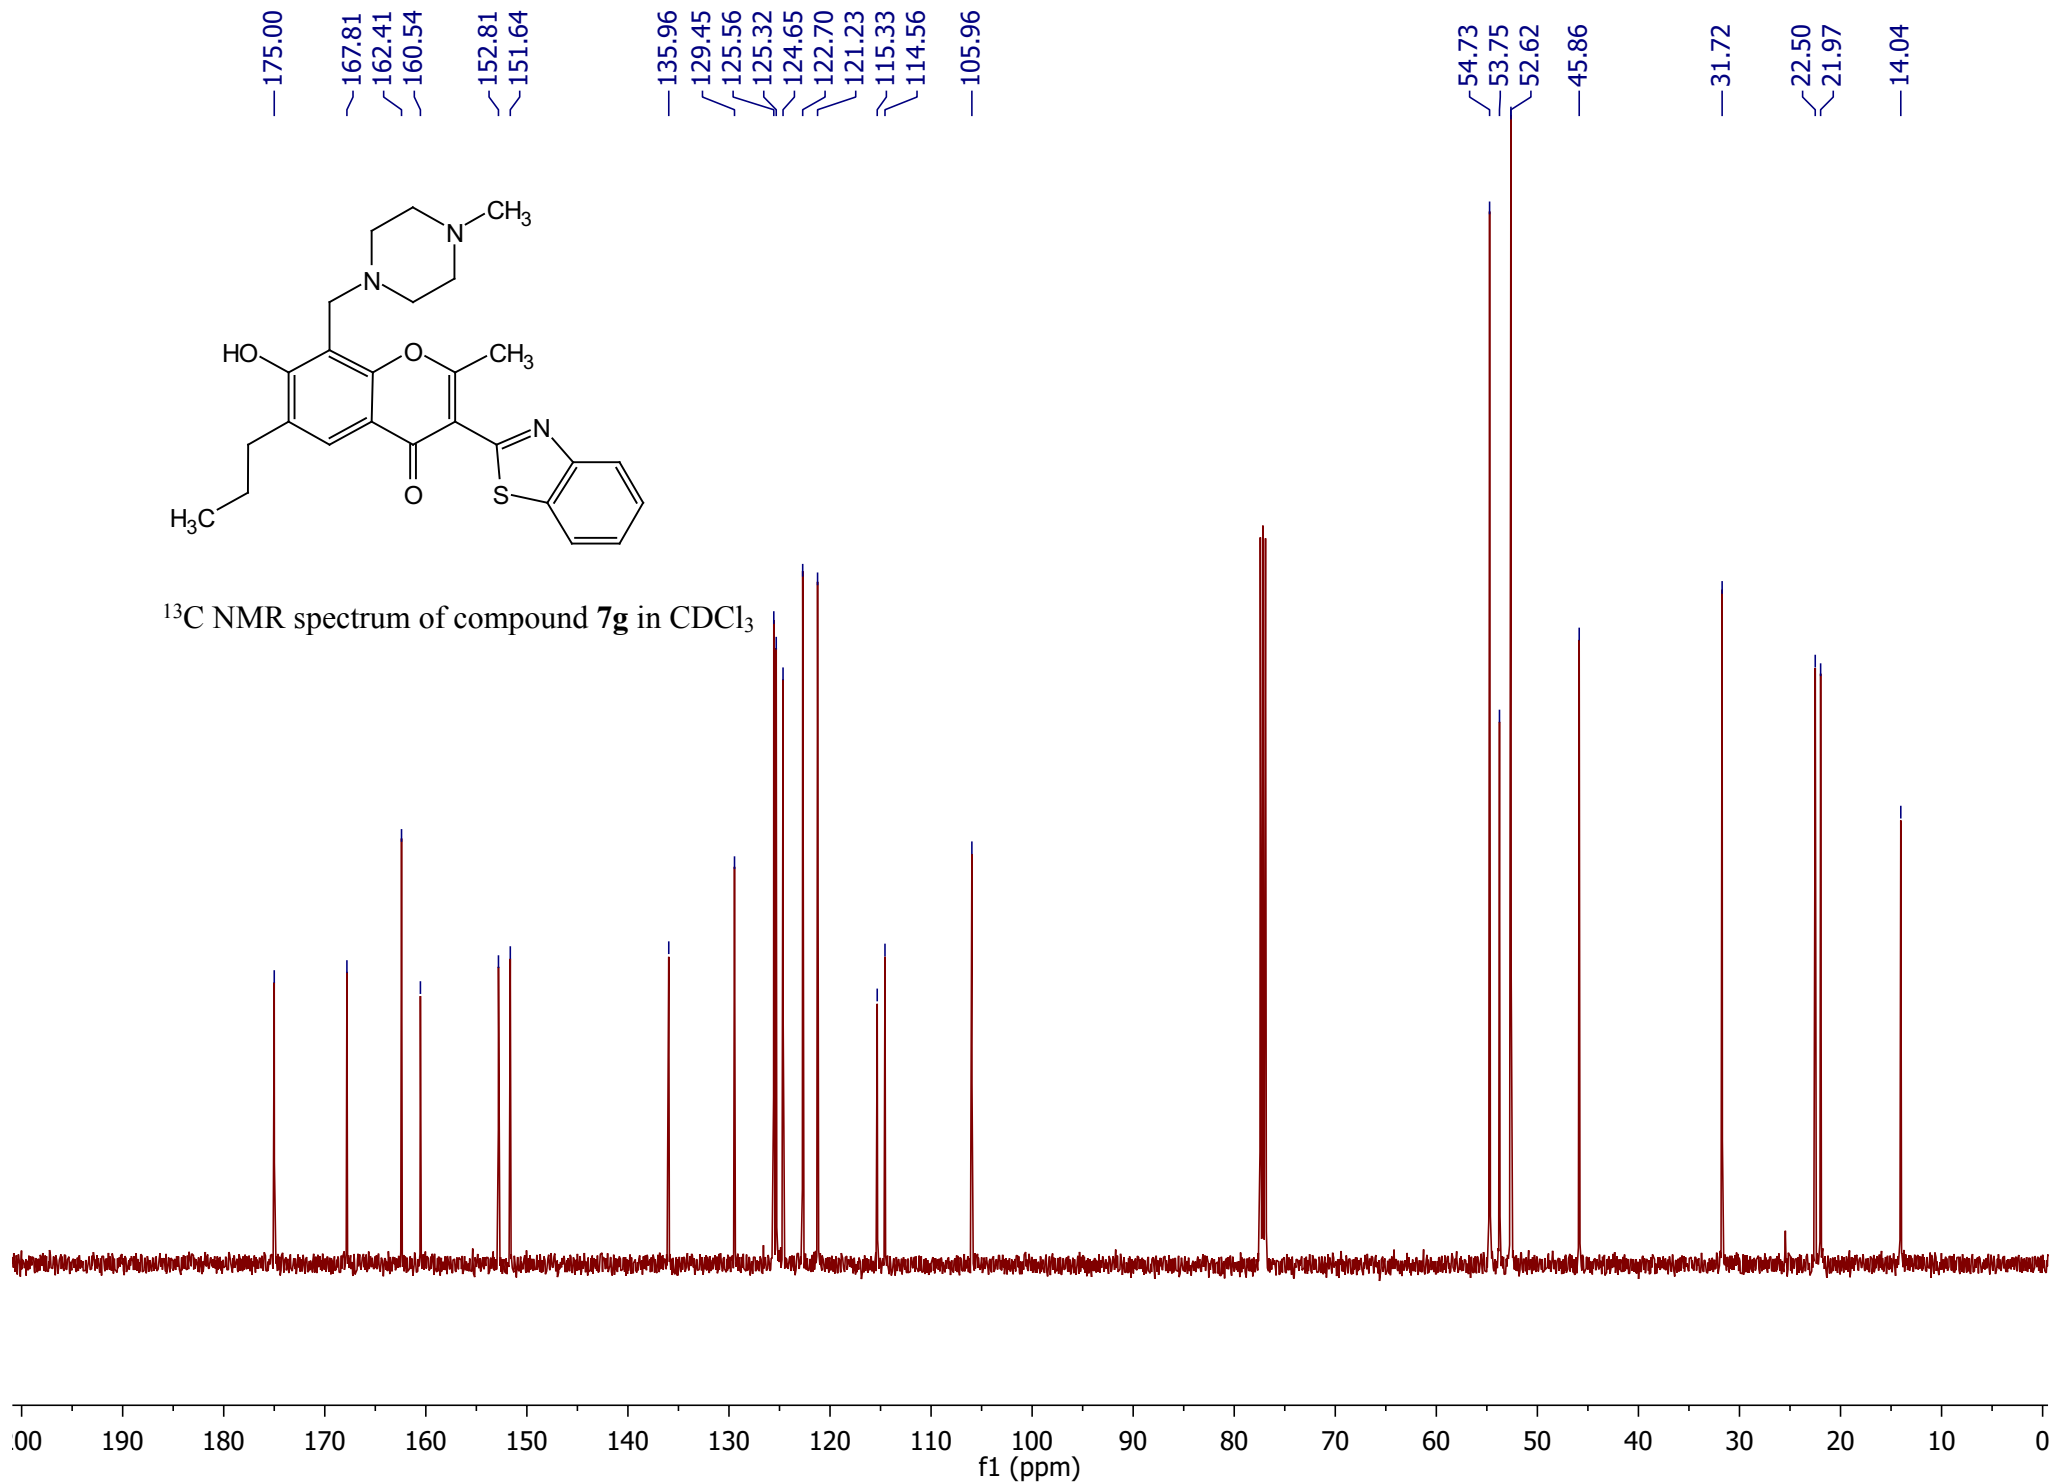

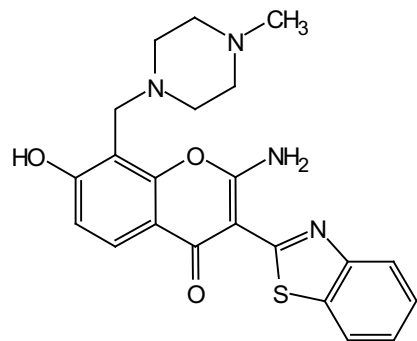

$^1\text{H}$  NMR spectrum of compound **7h** in DMSO- $\text{d}_6$

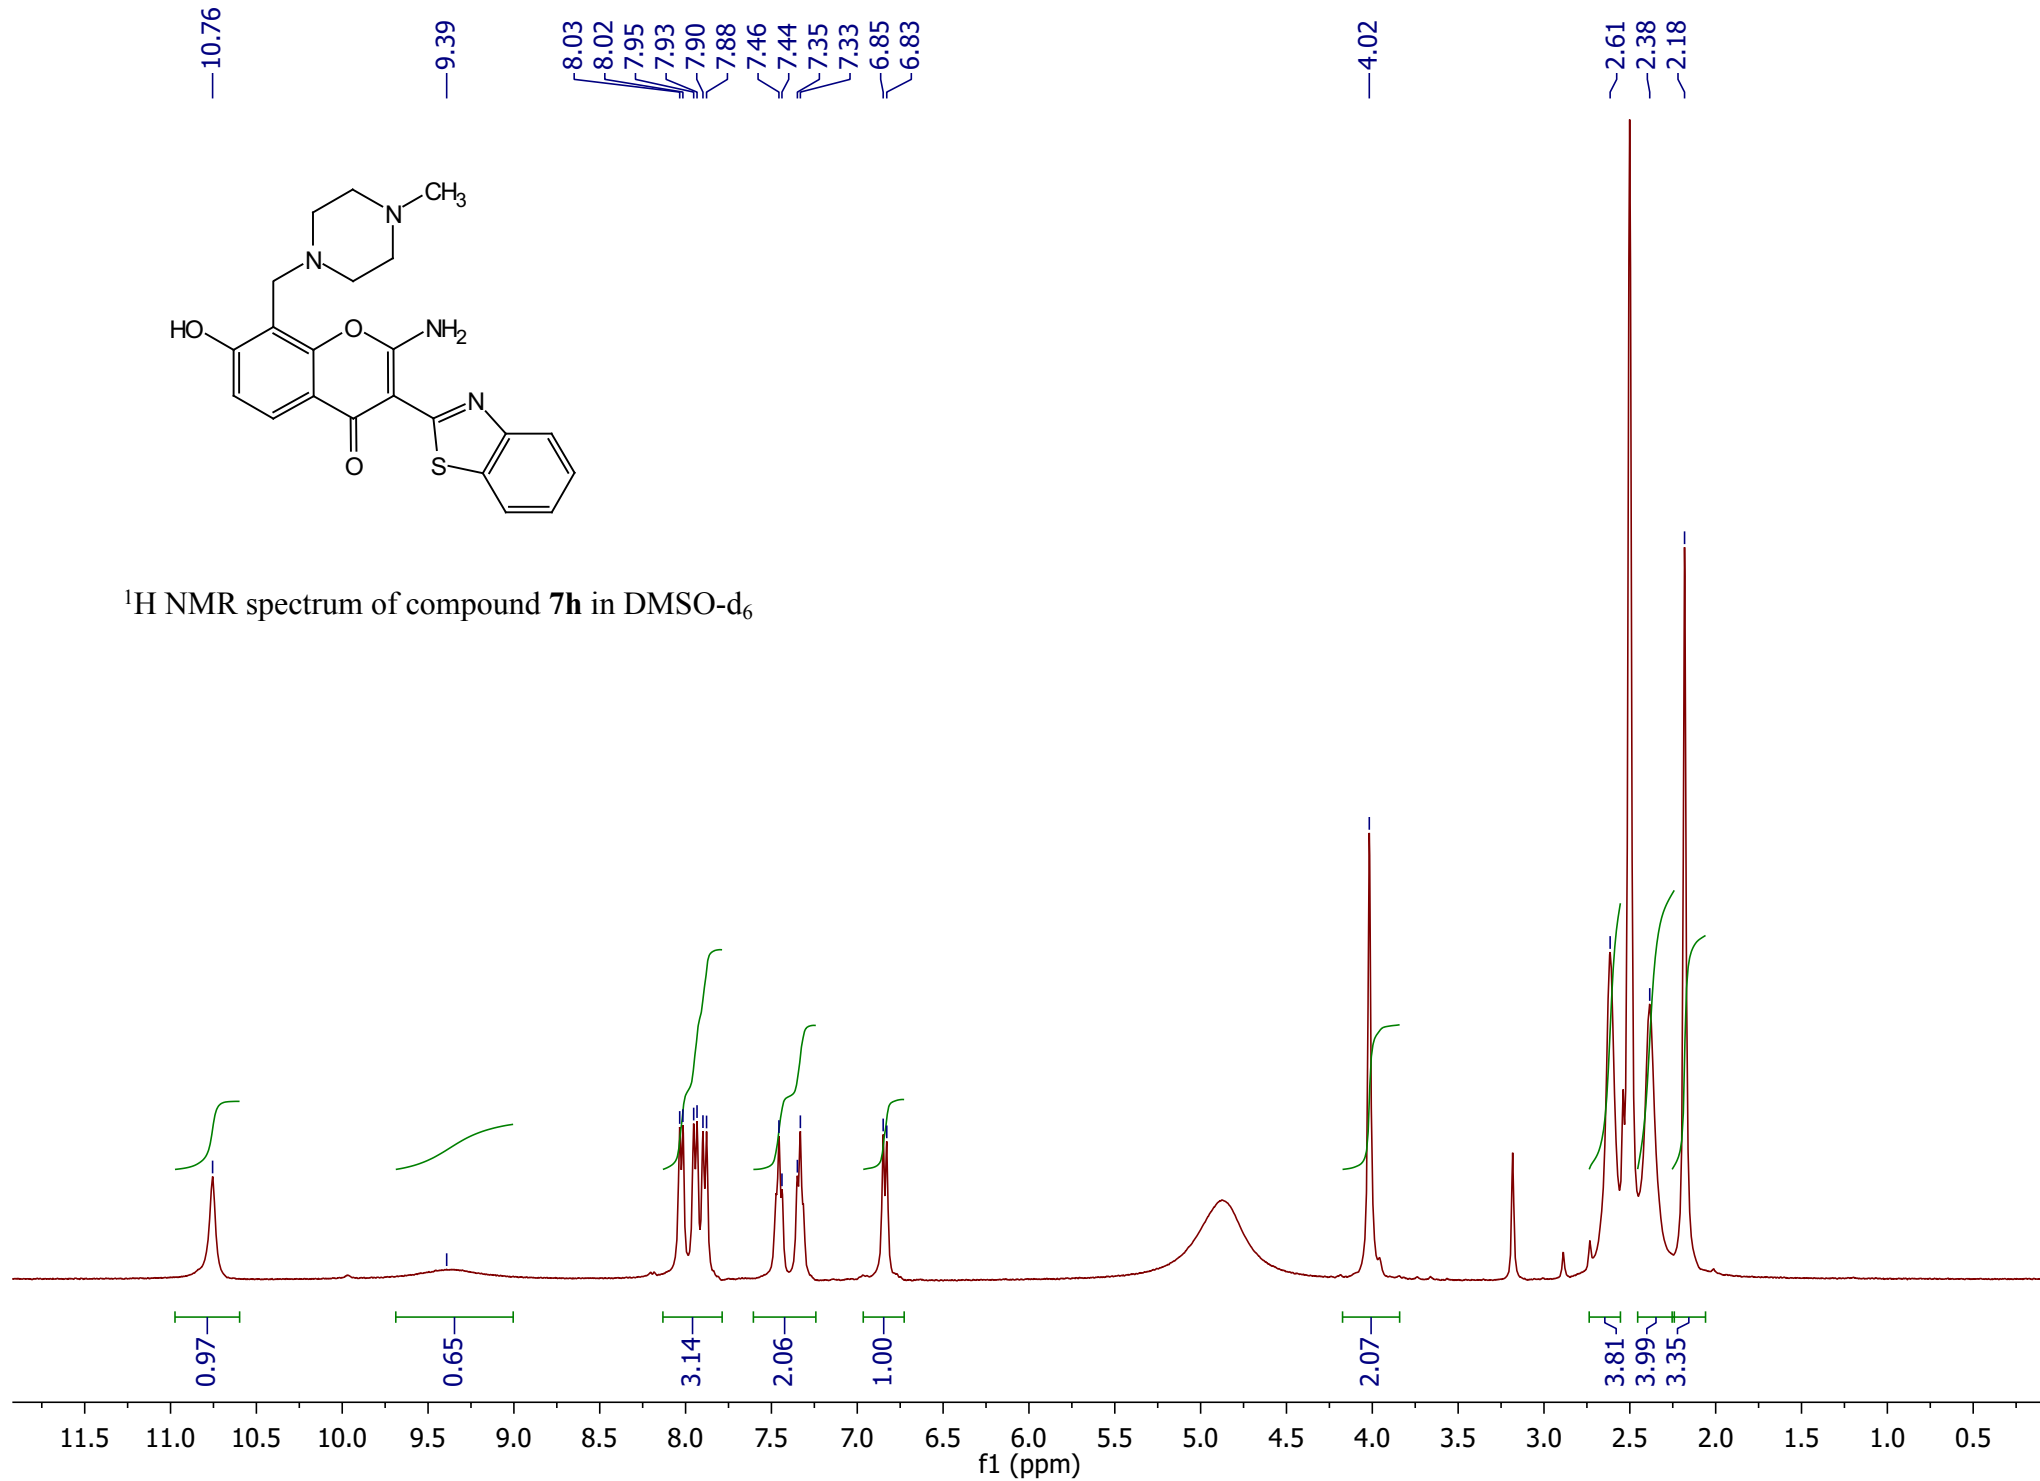



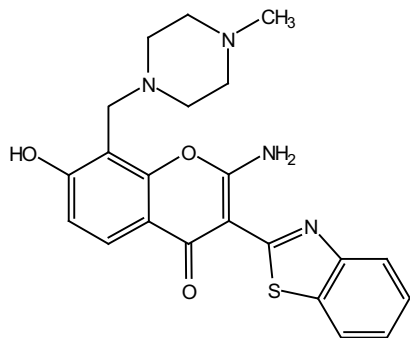

$^{13}\text{C}$  NMR spectrum of compound **7h** in DMSO- $\text{d}_6$

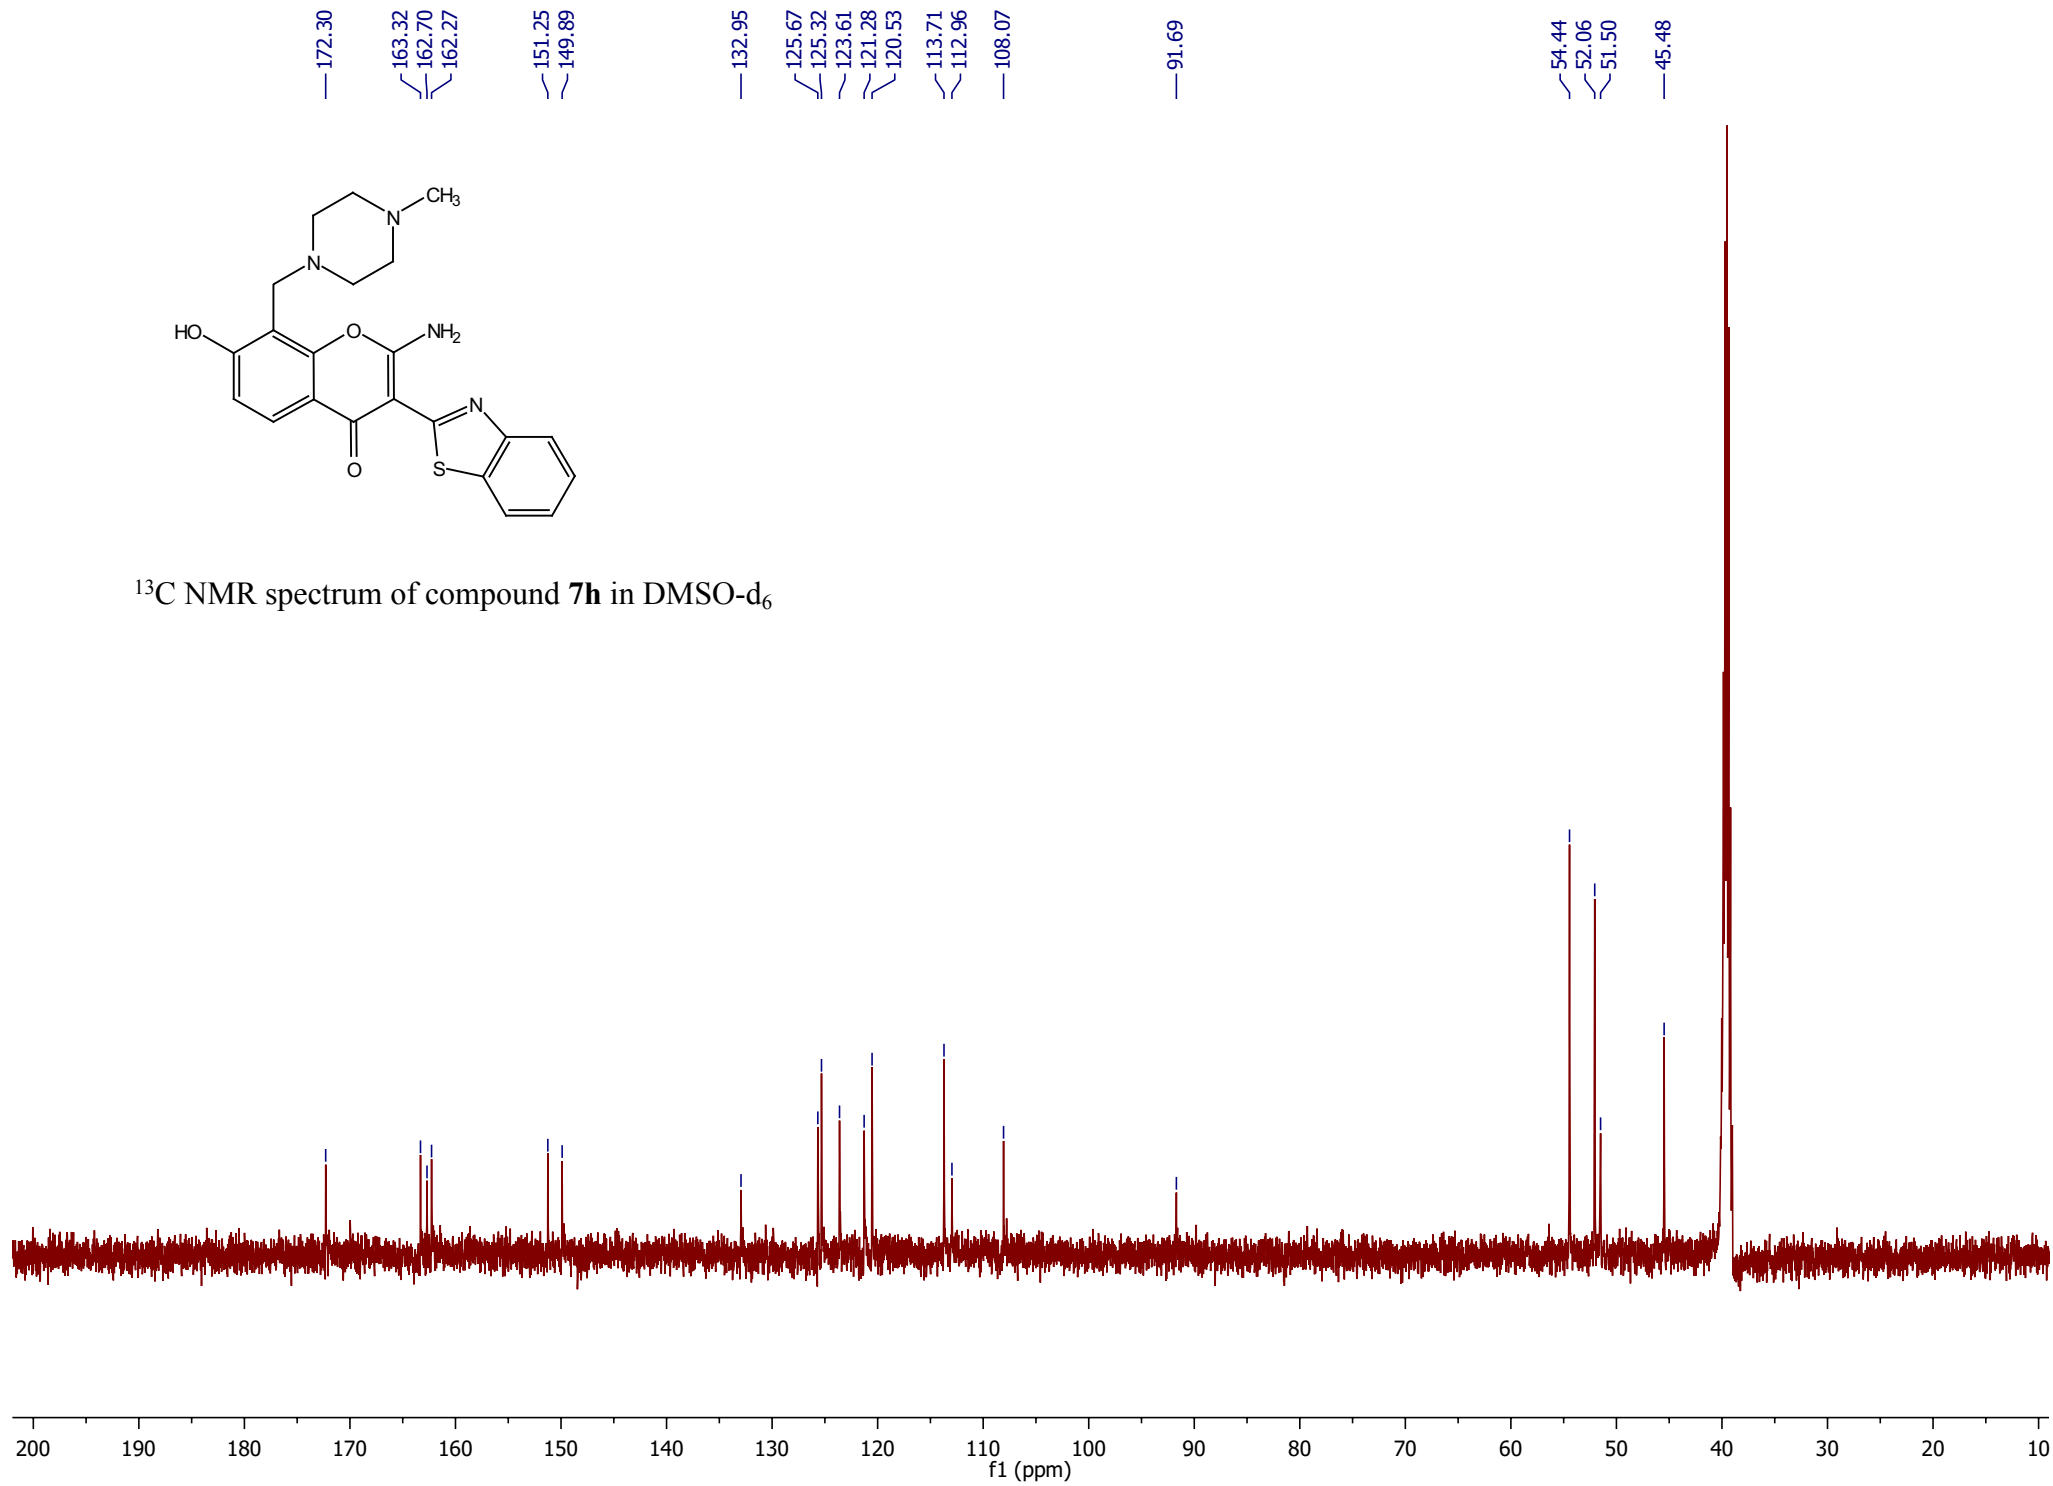

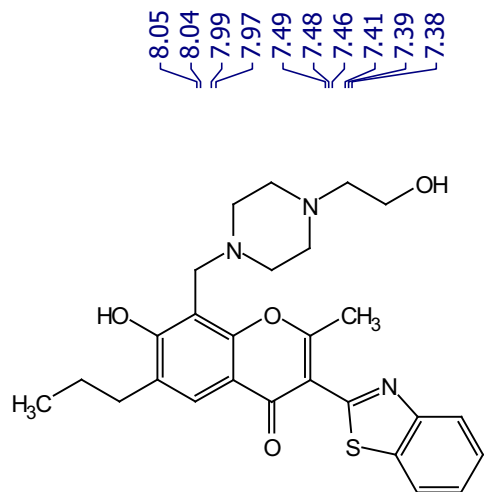

$^1\text{H}$  NMR spectrum of compound **7i** in  $\text{CDCl}_3$

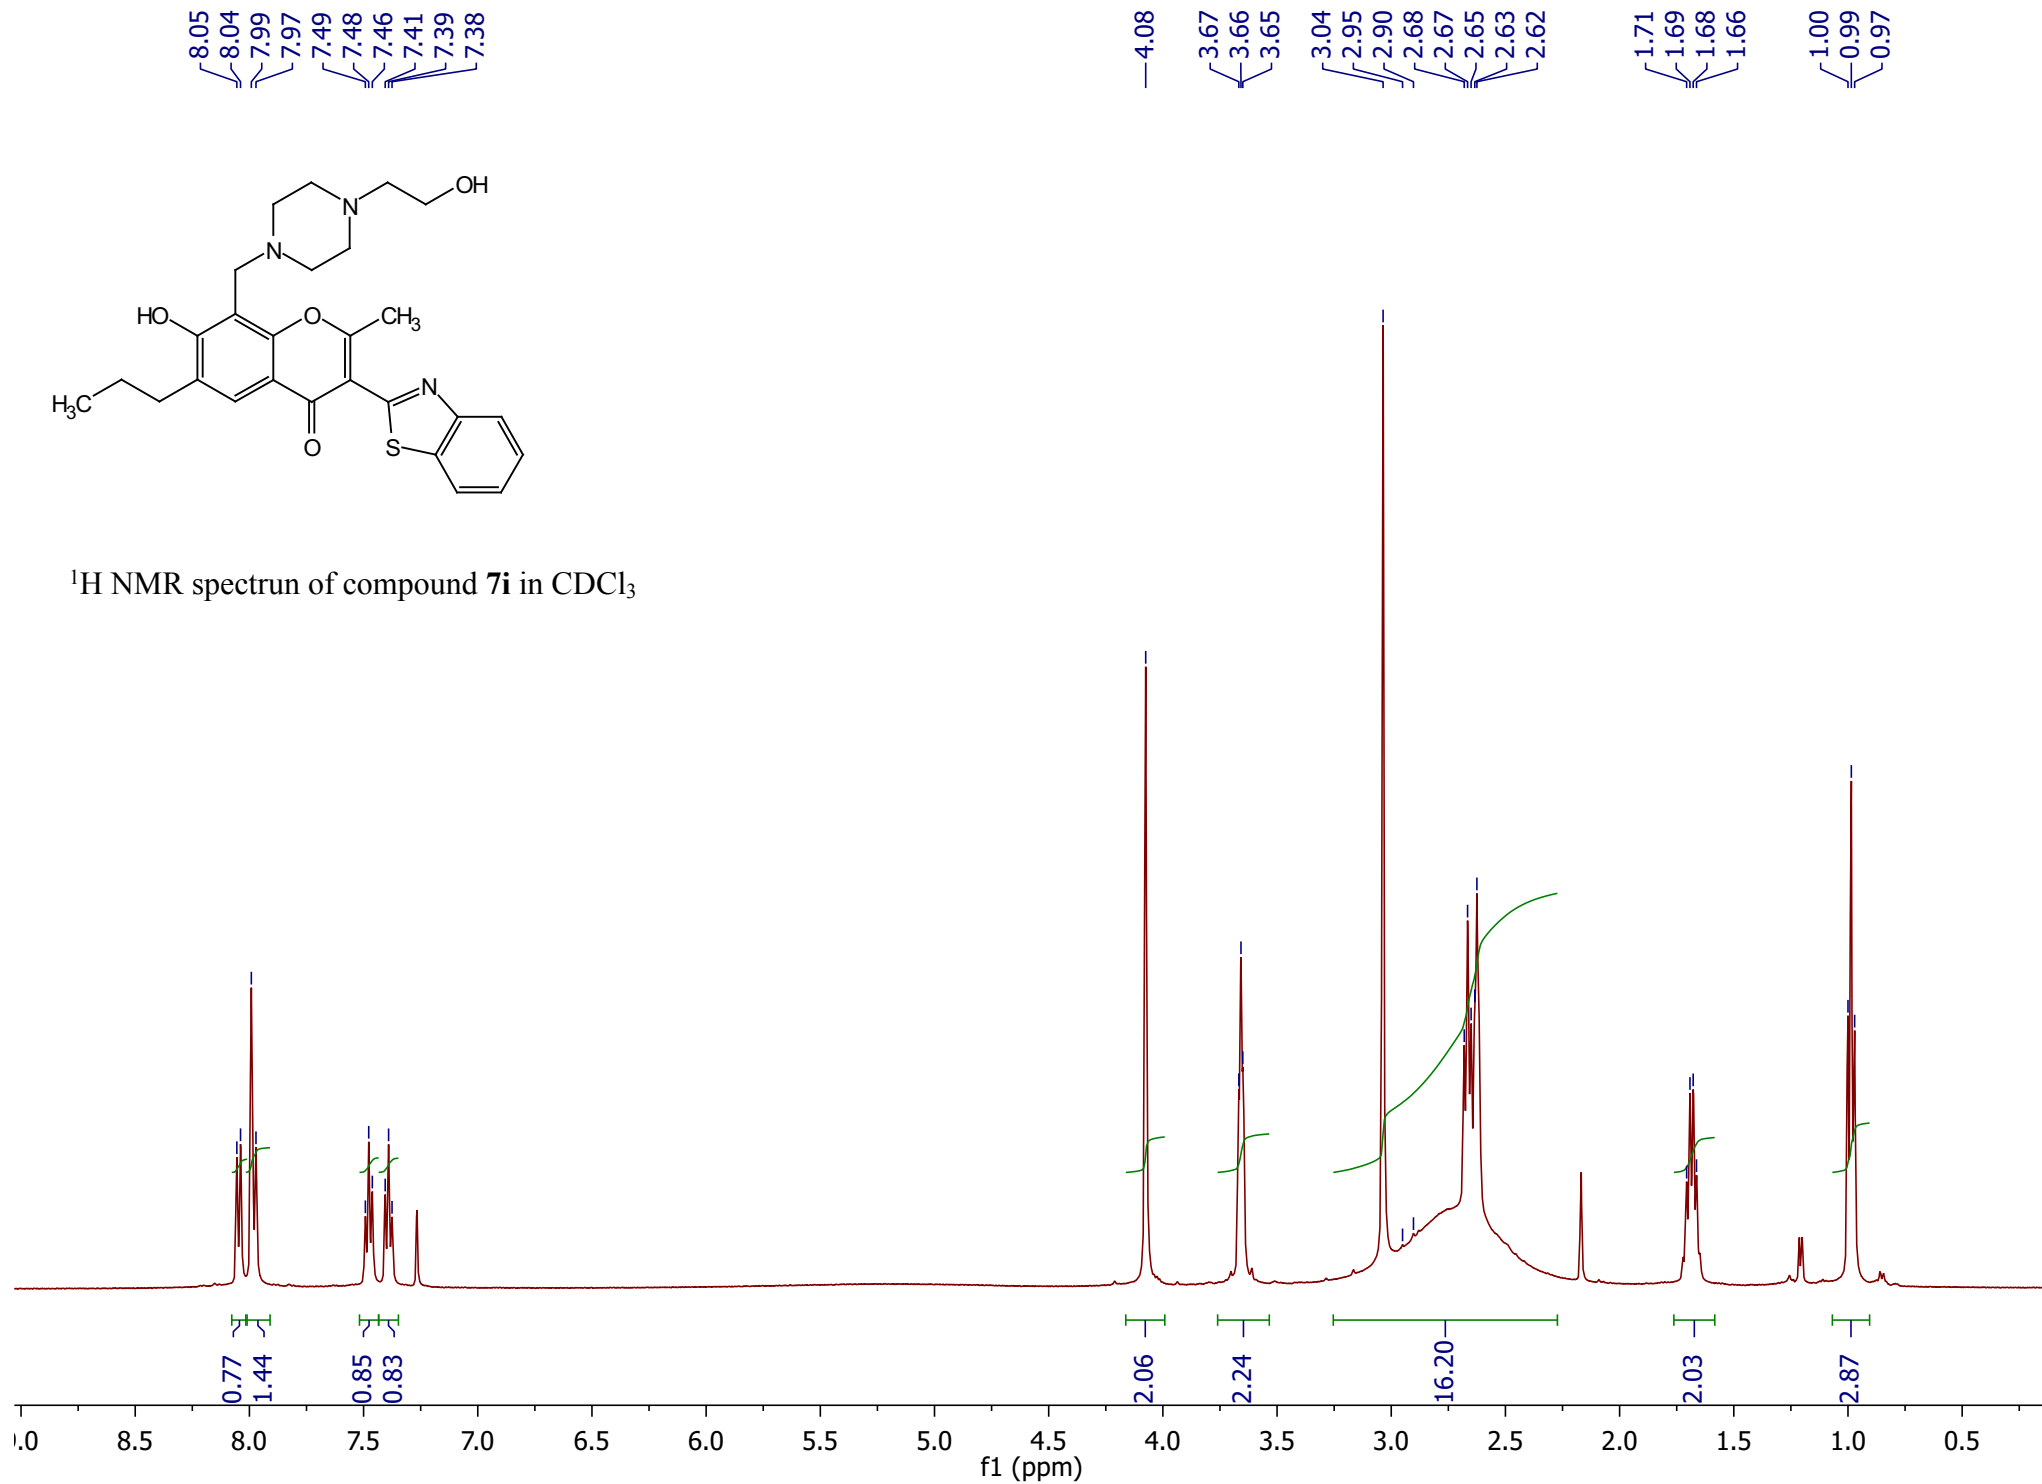

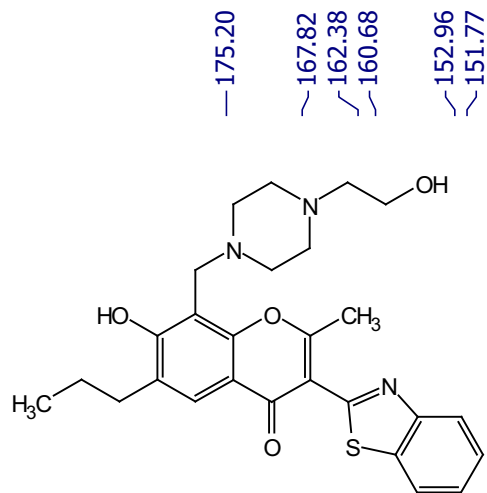

$^{13}\text{C}$  NMR spectrum of compound **7i** in  $\text{CDCl}_3$

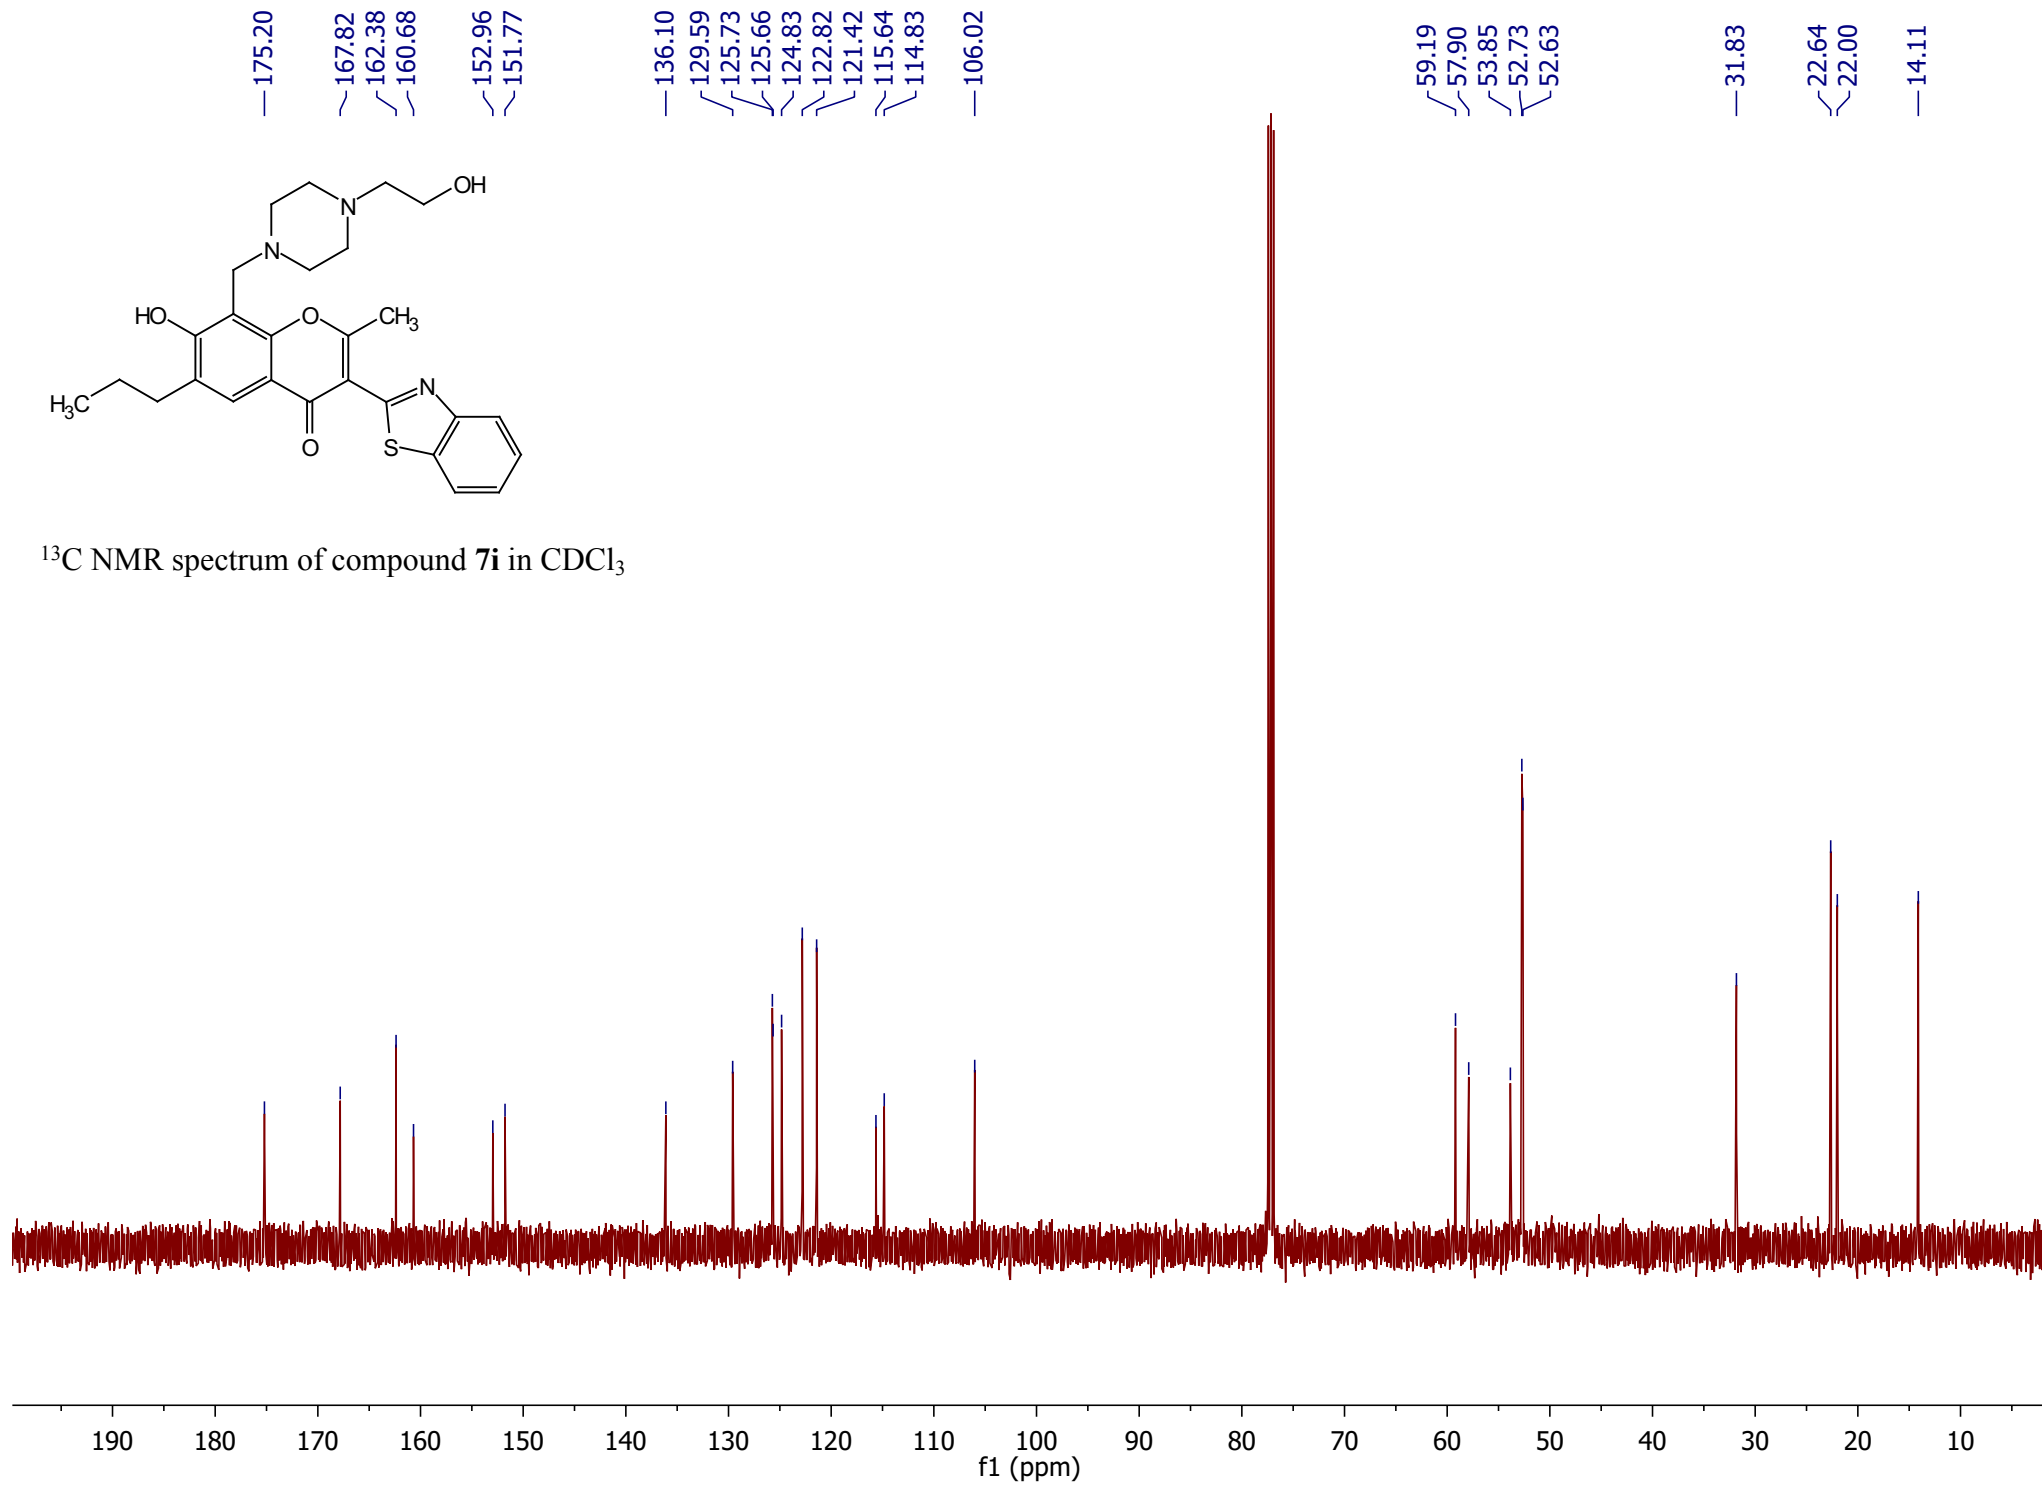

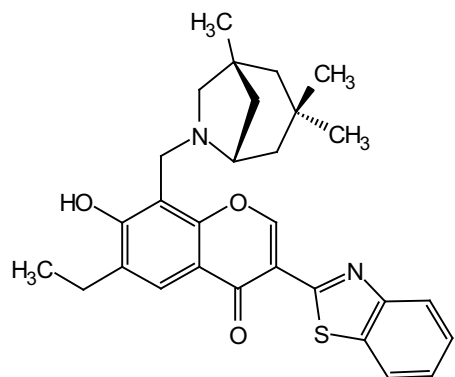

$^1\text{H}$  NMR spectrum of compound **7j** in  $\text{CDCl}_3$

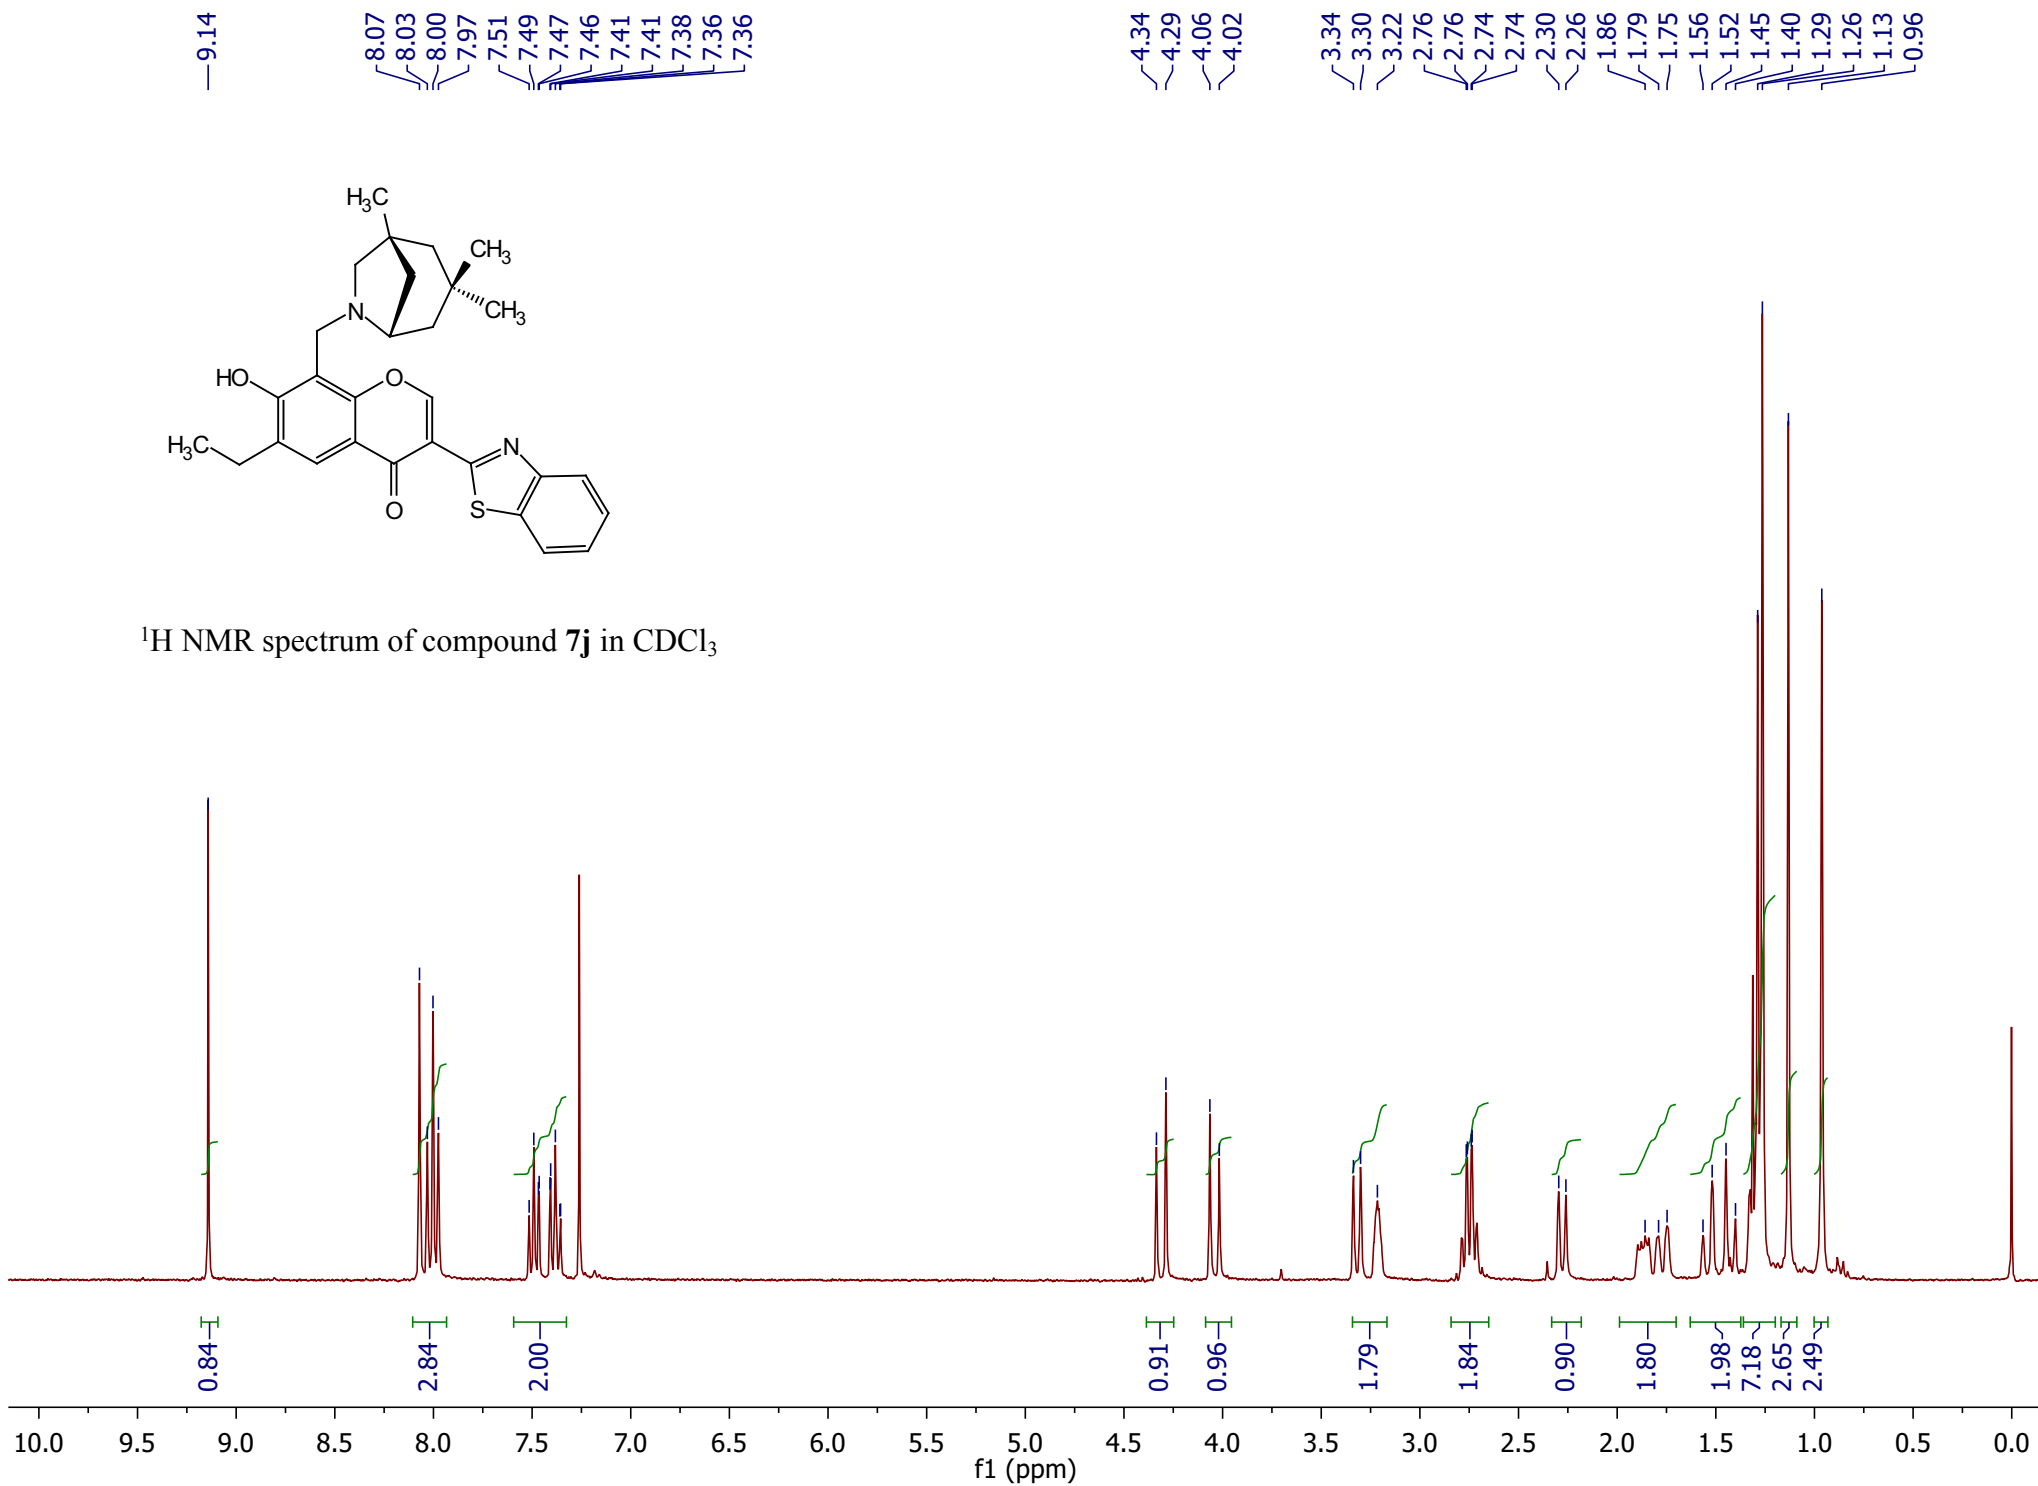

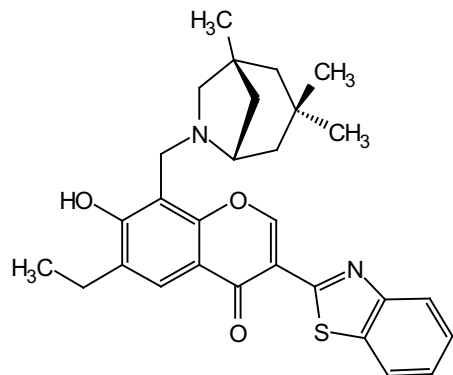

$^{13}\text{C}$  NMR spectrum of compound **7j** in  $\text{CDCl}_3$

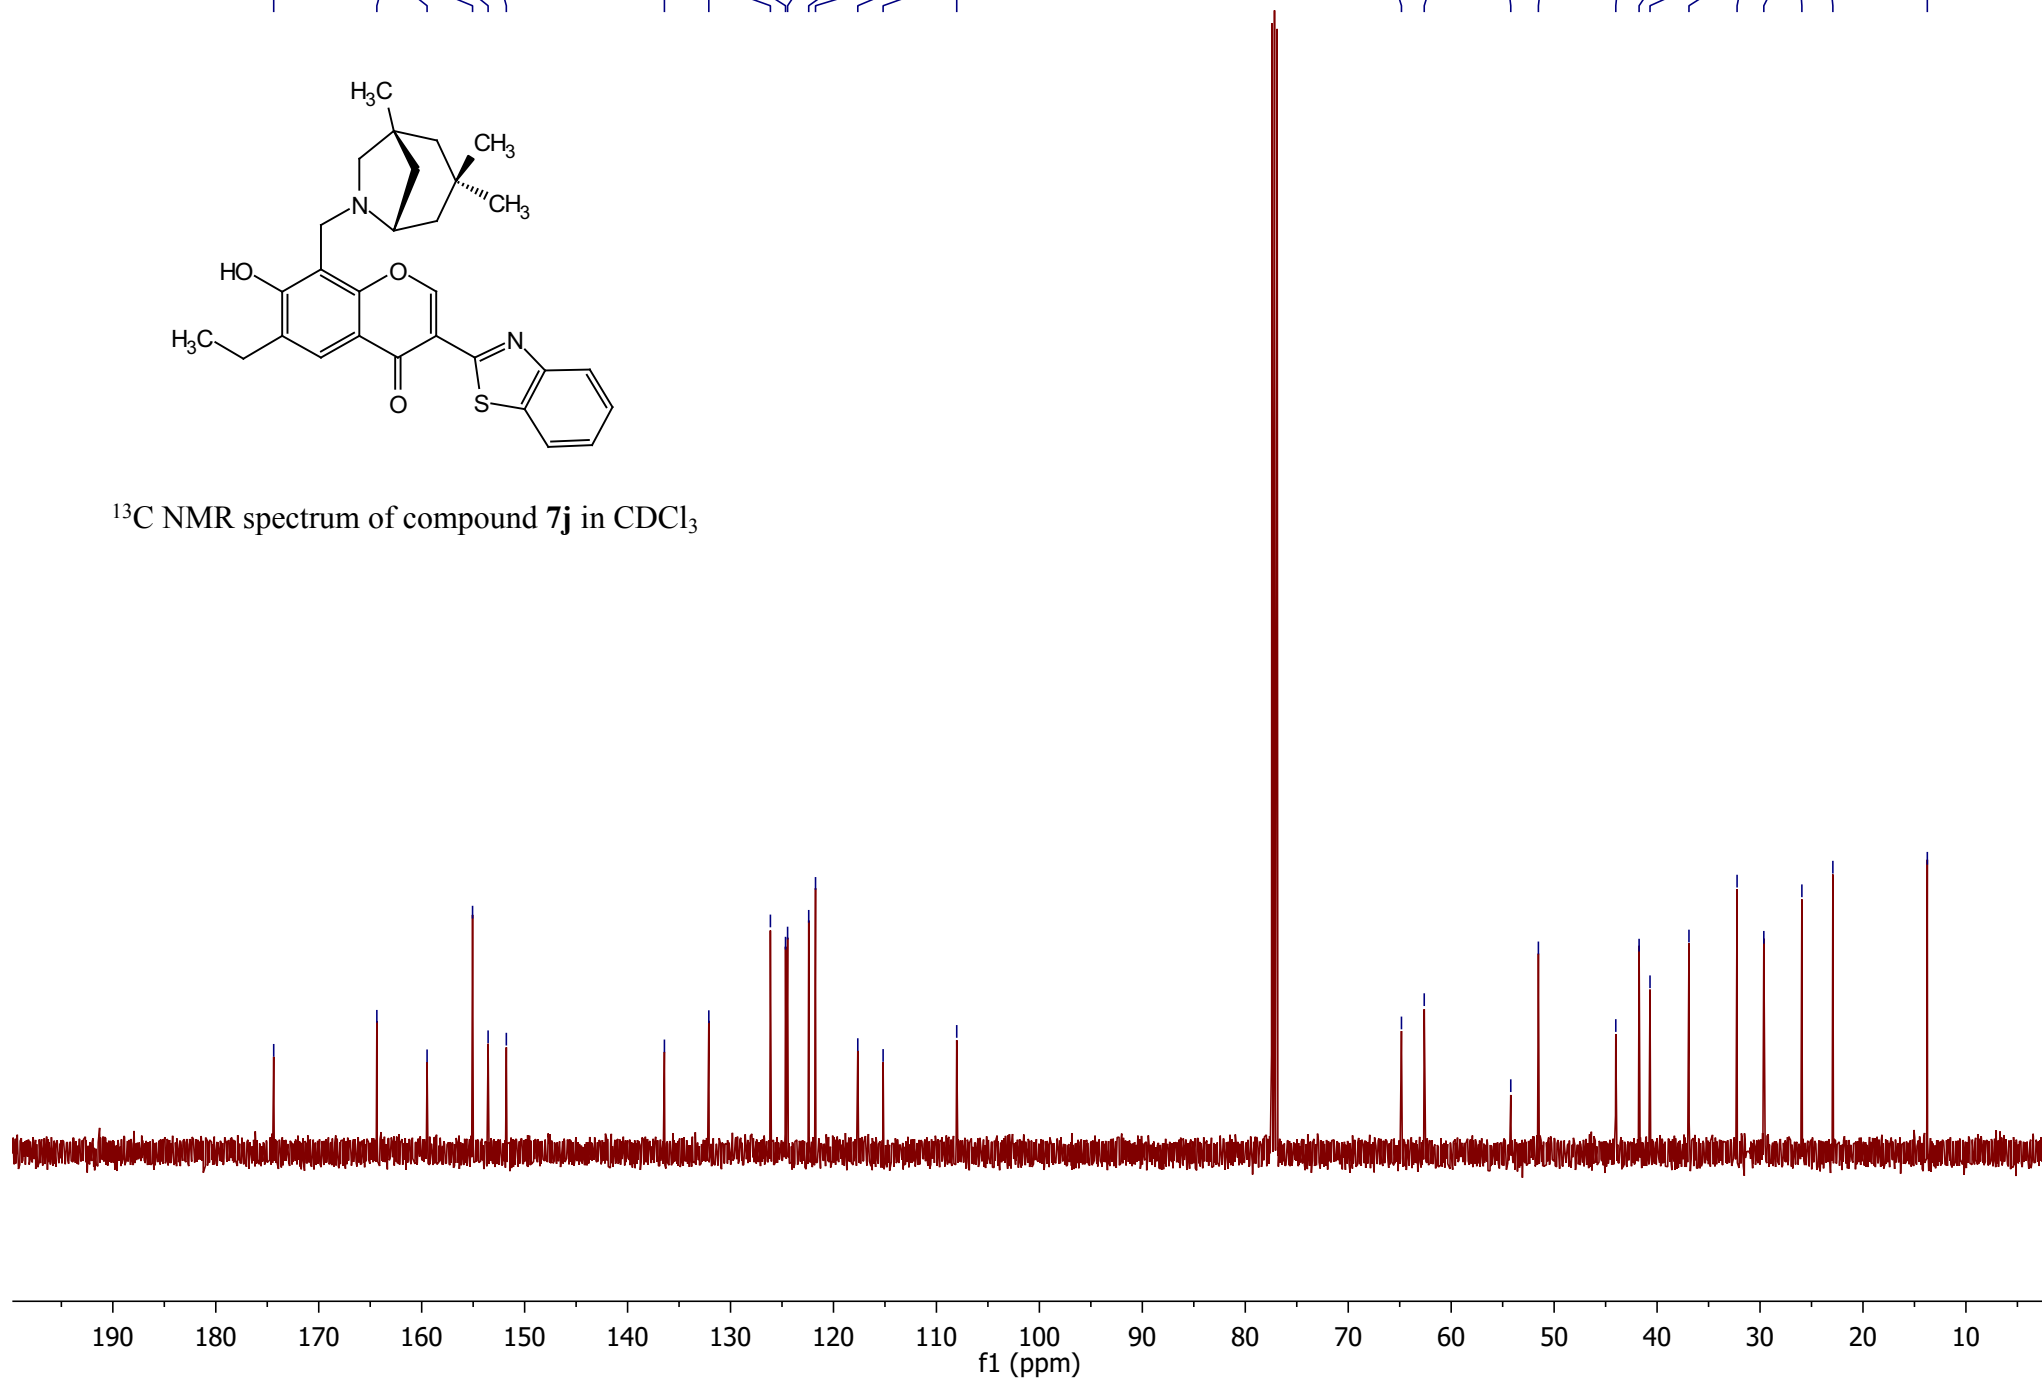

—10.43

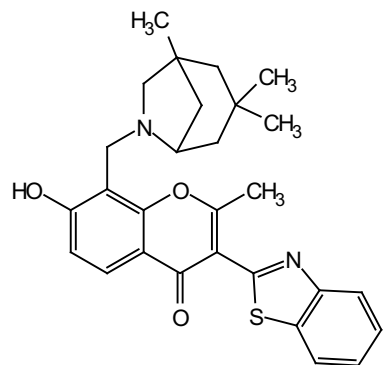

$^1\text{H}$  NMR spectrum of compound **7k** in  $\text{CDCl}_3$

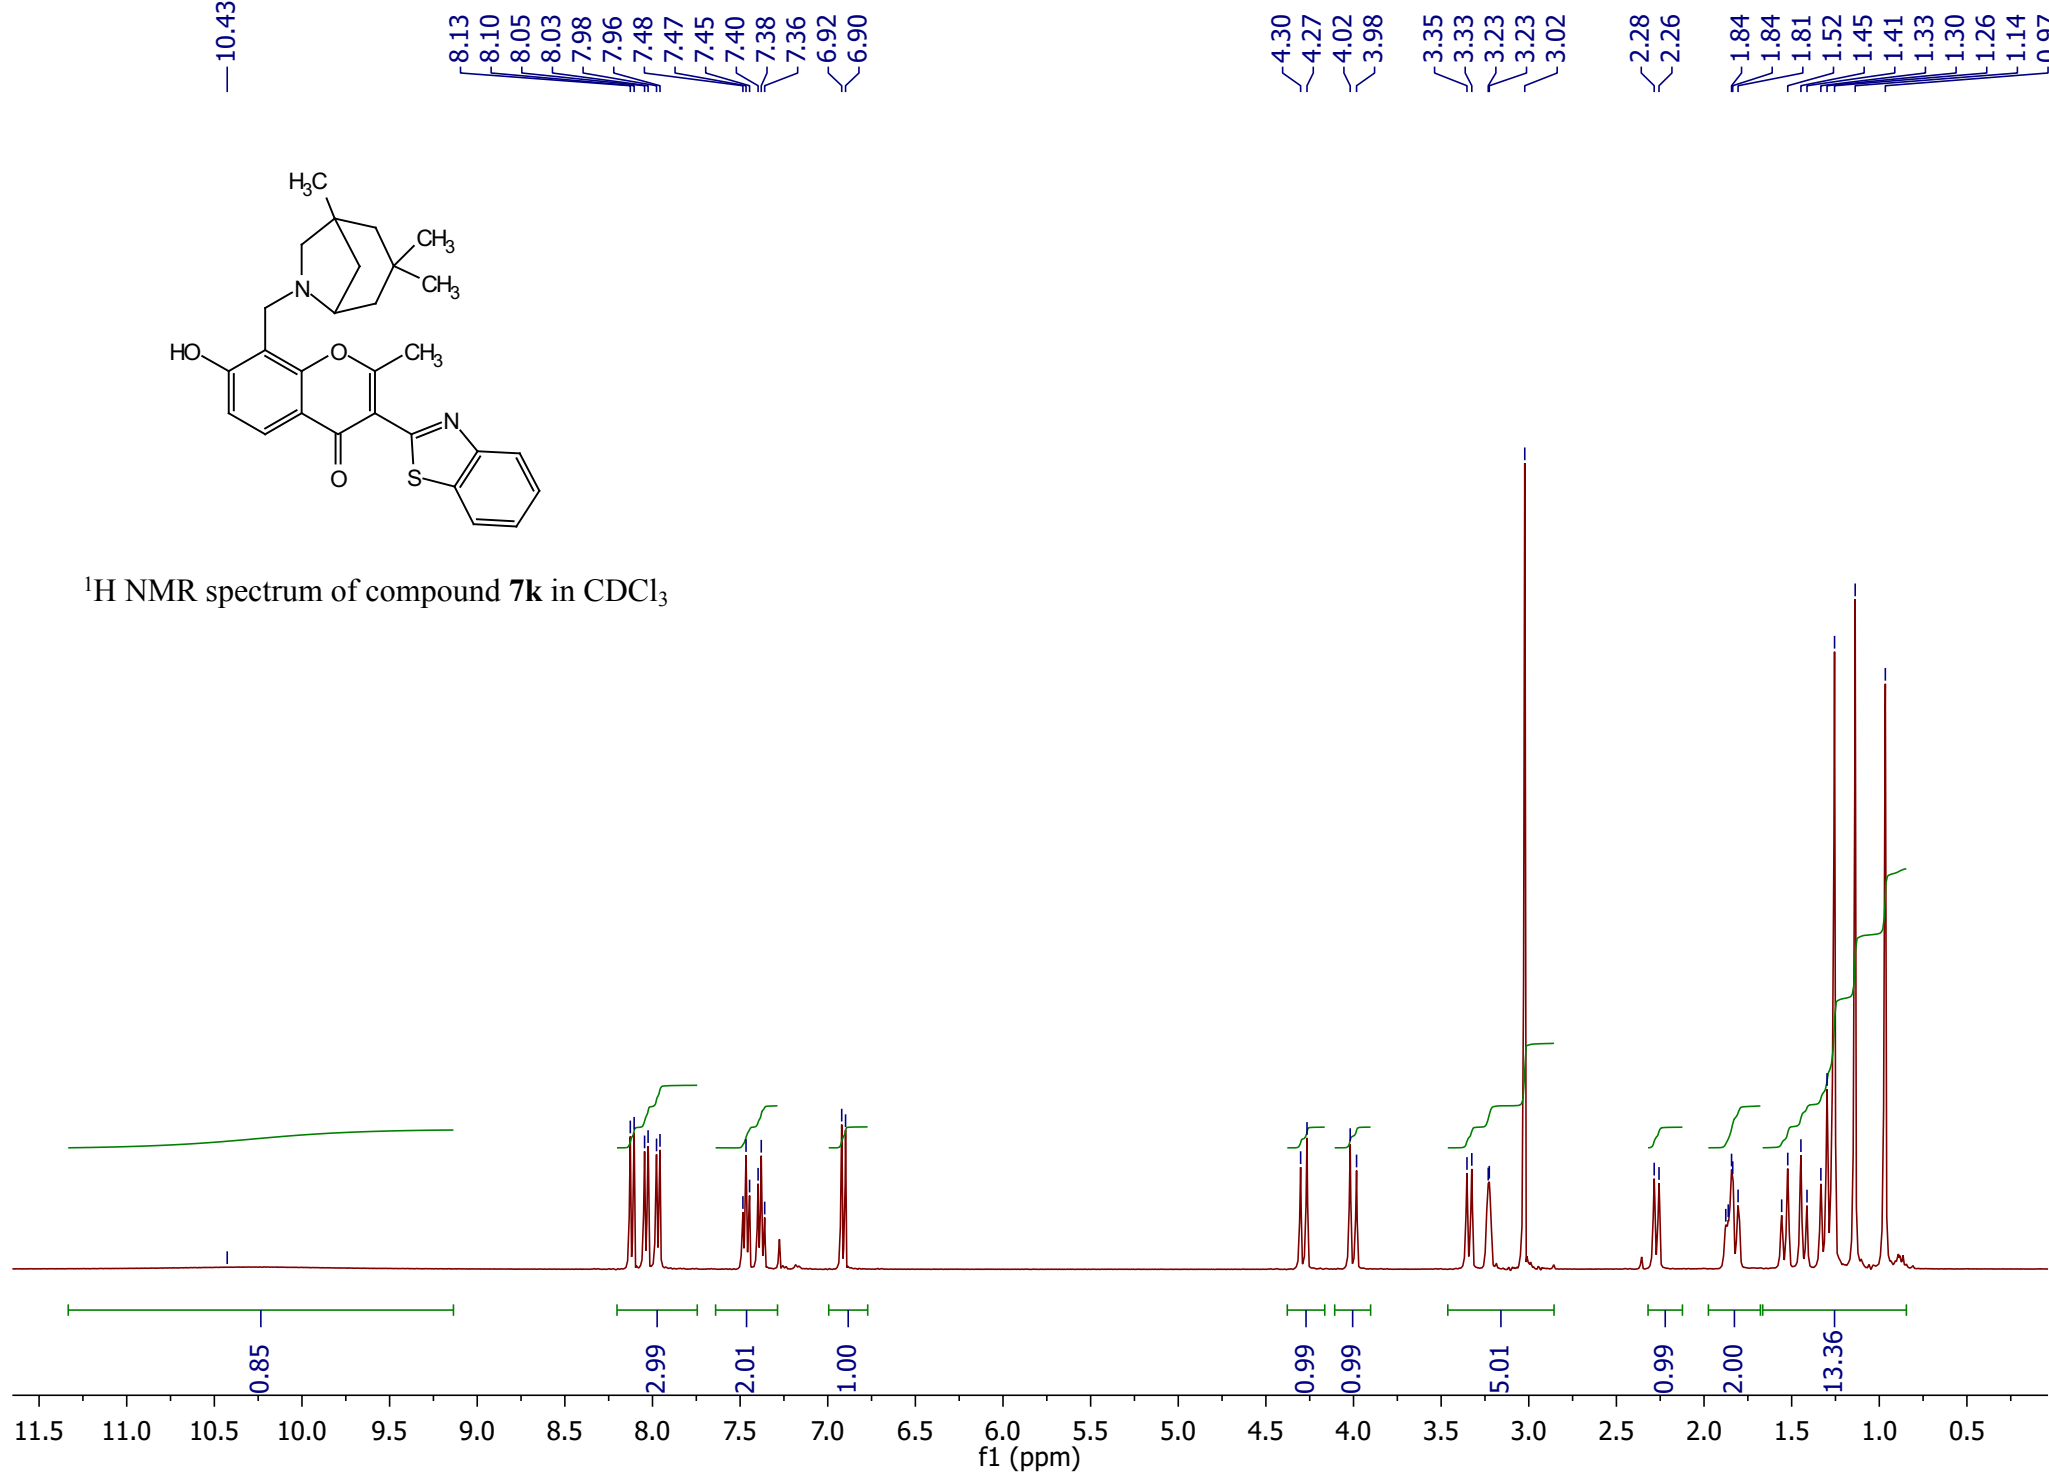



$^{13}\text{C}$  NMR spectrum of compound **7k** in  $\text{CDCl}_3$

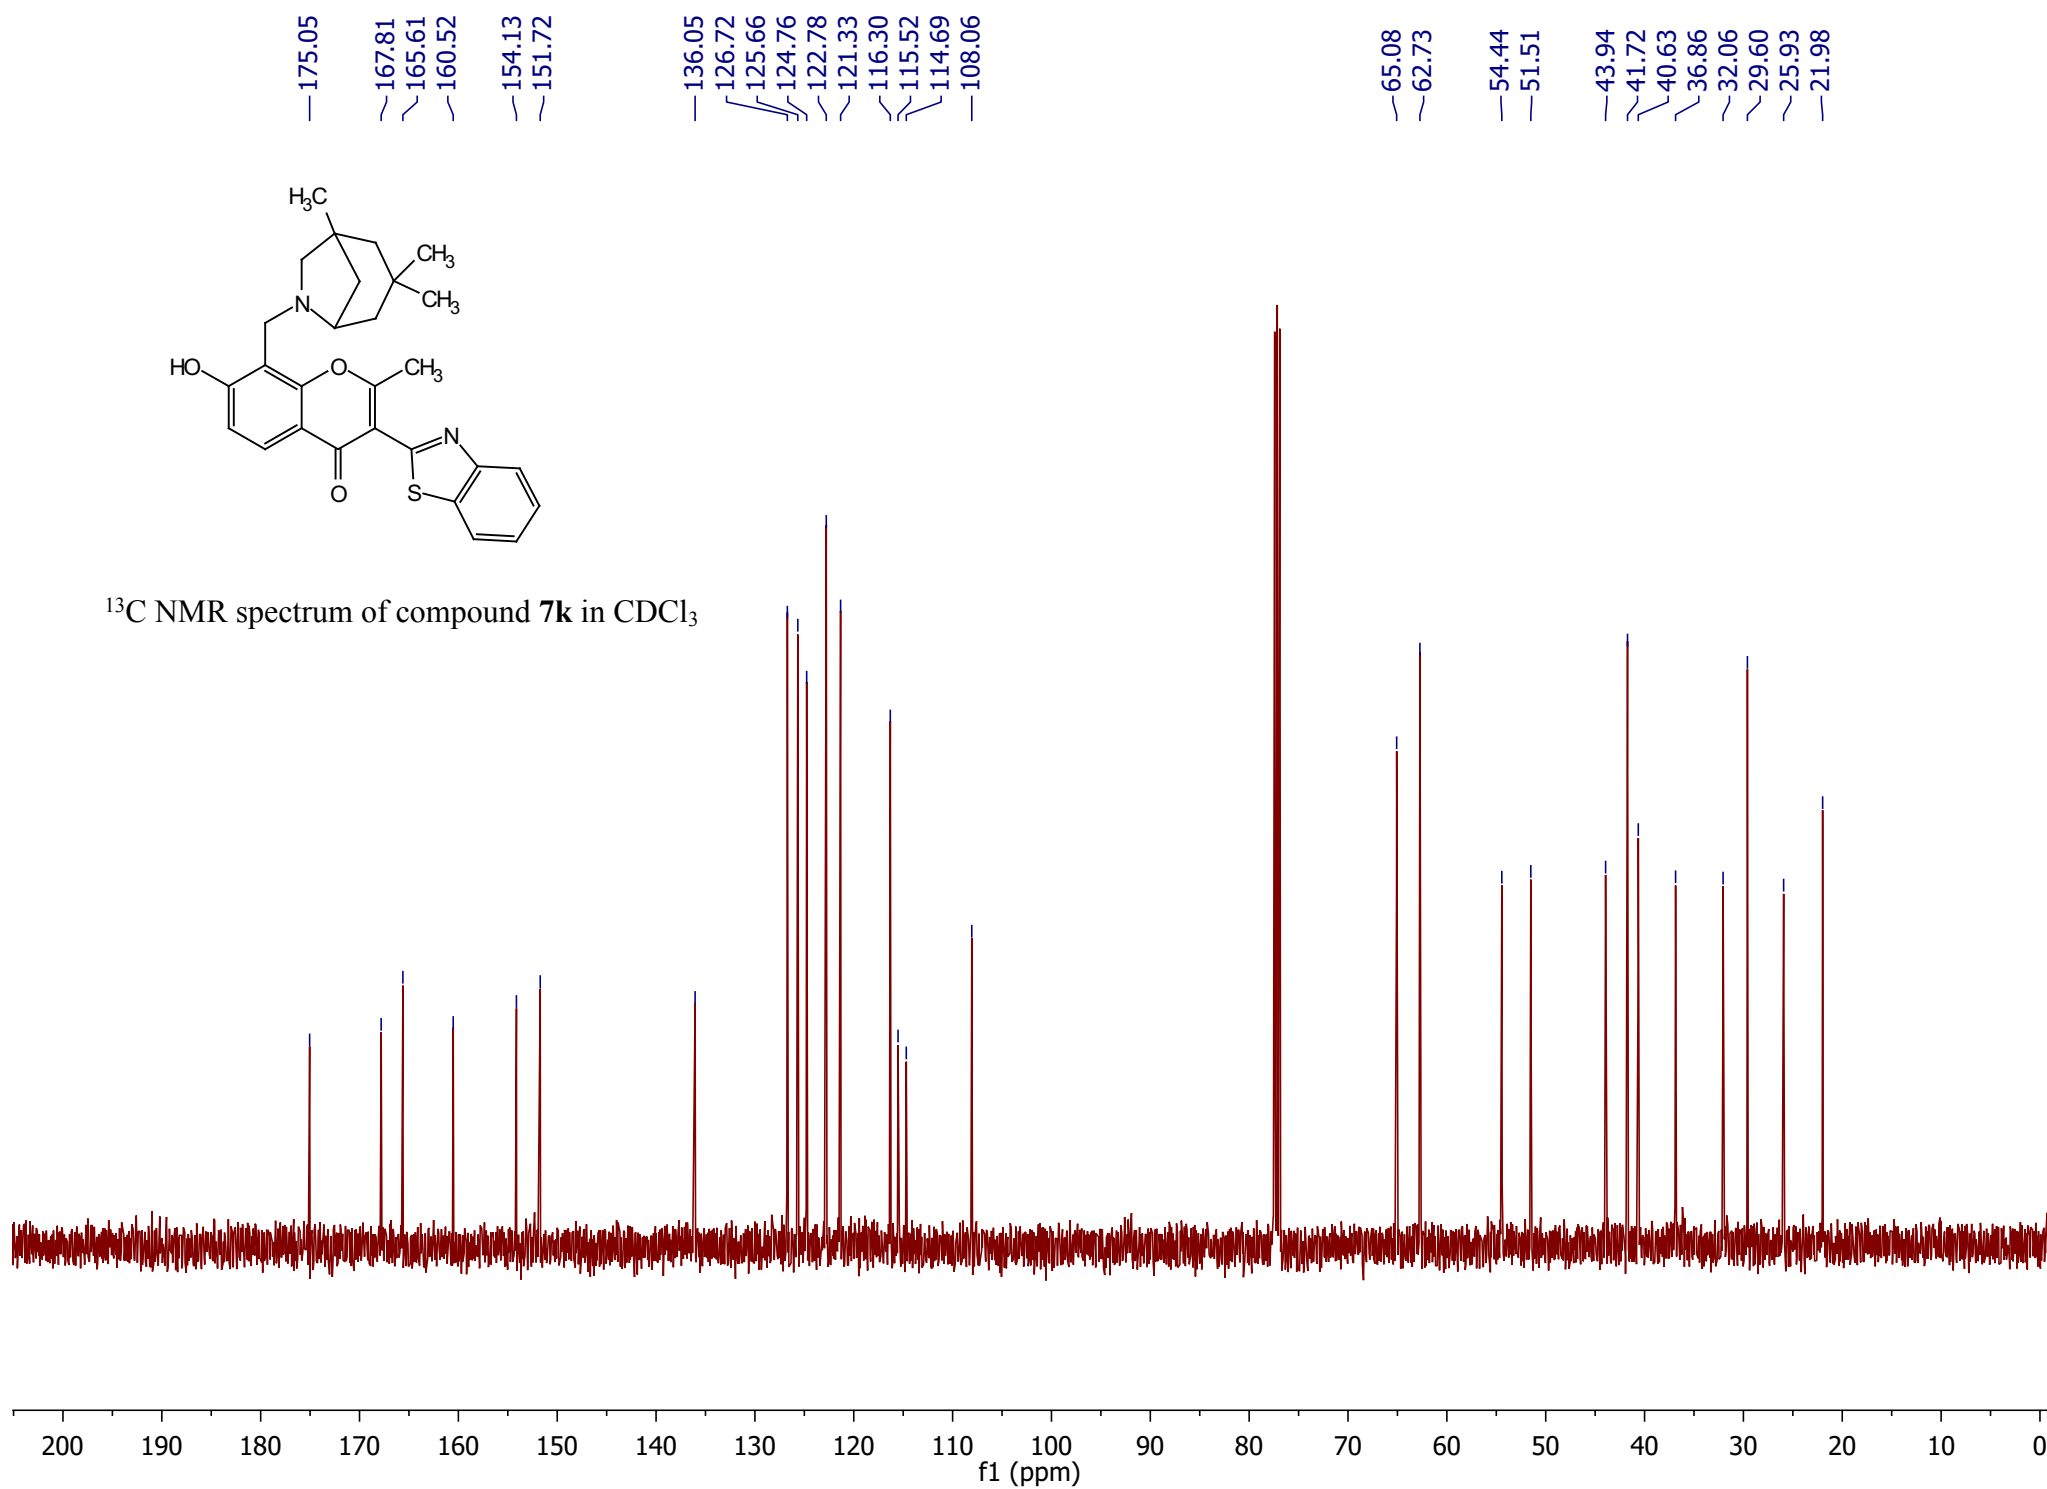

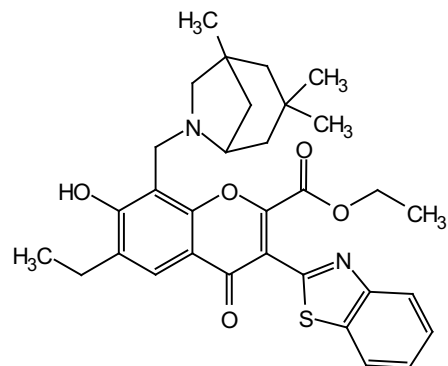

$^1\text{H}$  NMR spectrum of compound **71** in  $\text{CDCl}_3$

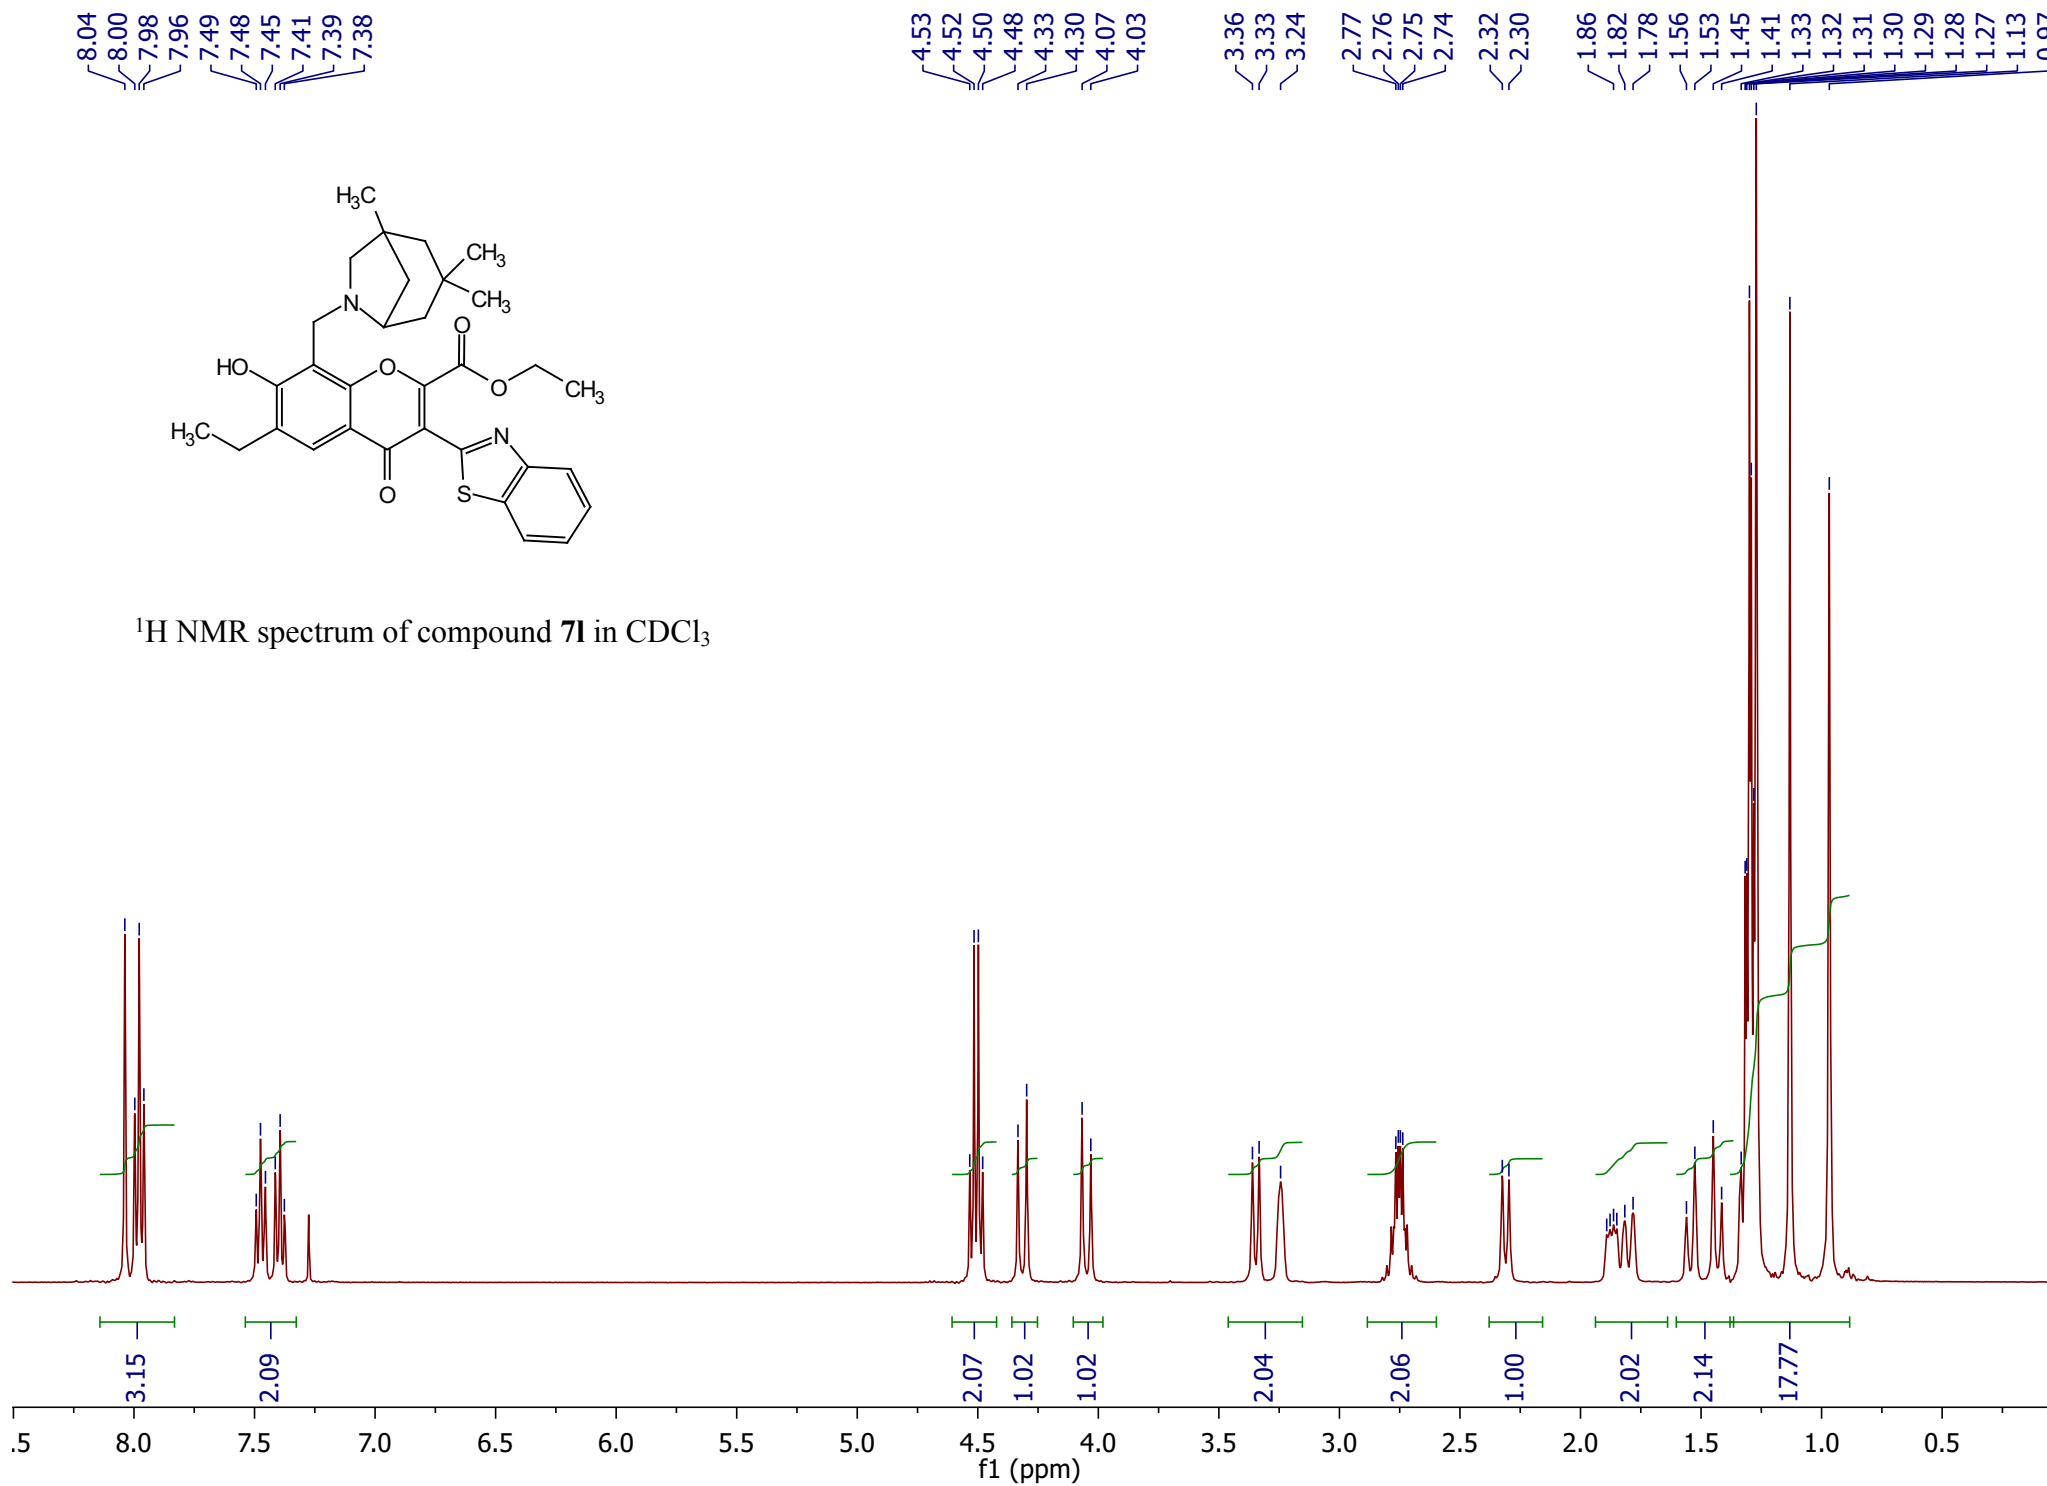



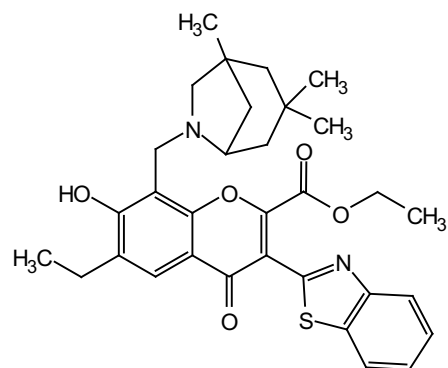

$^{13}\text{C}$  NMR spectrum of compound **7l** in  $\text{CDCl}_3$

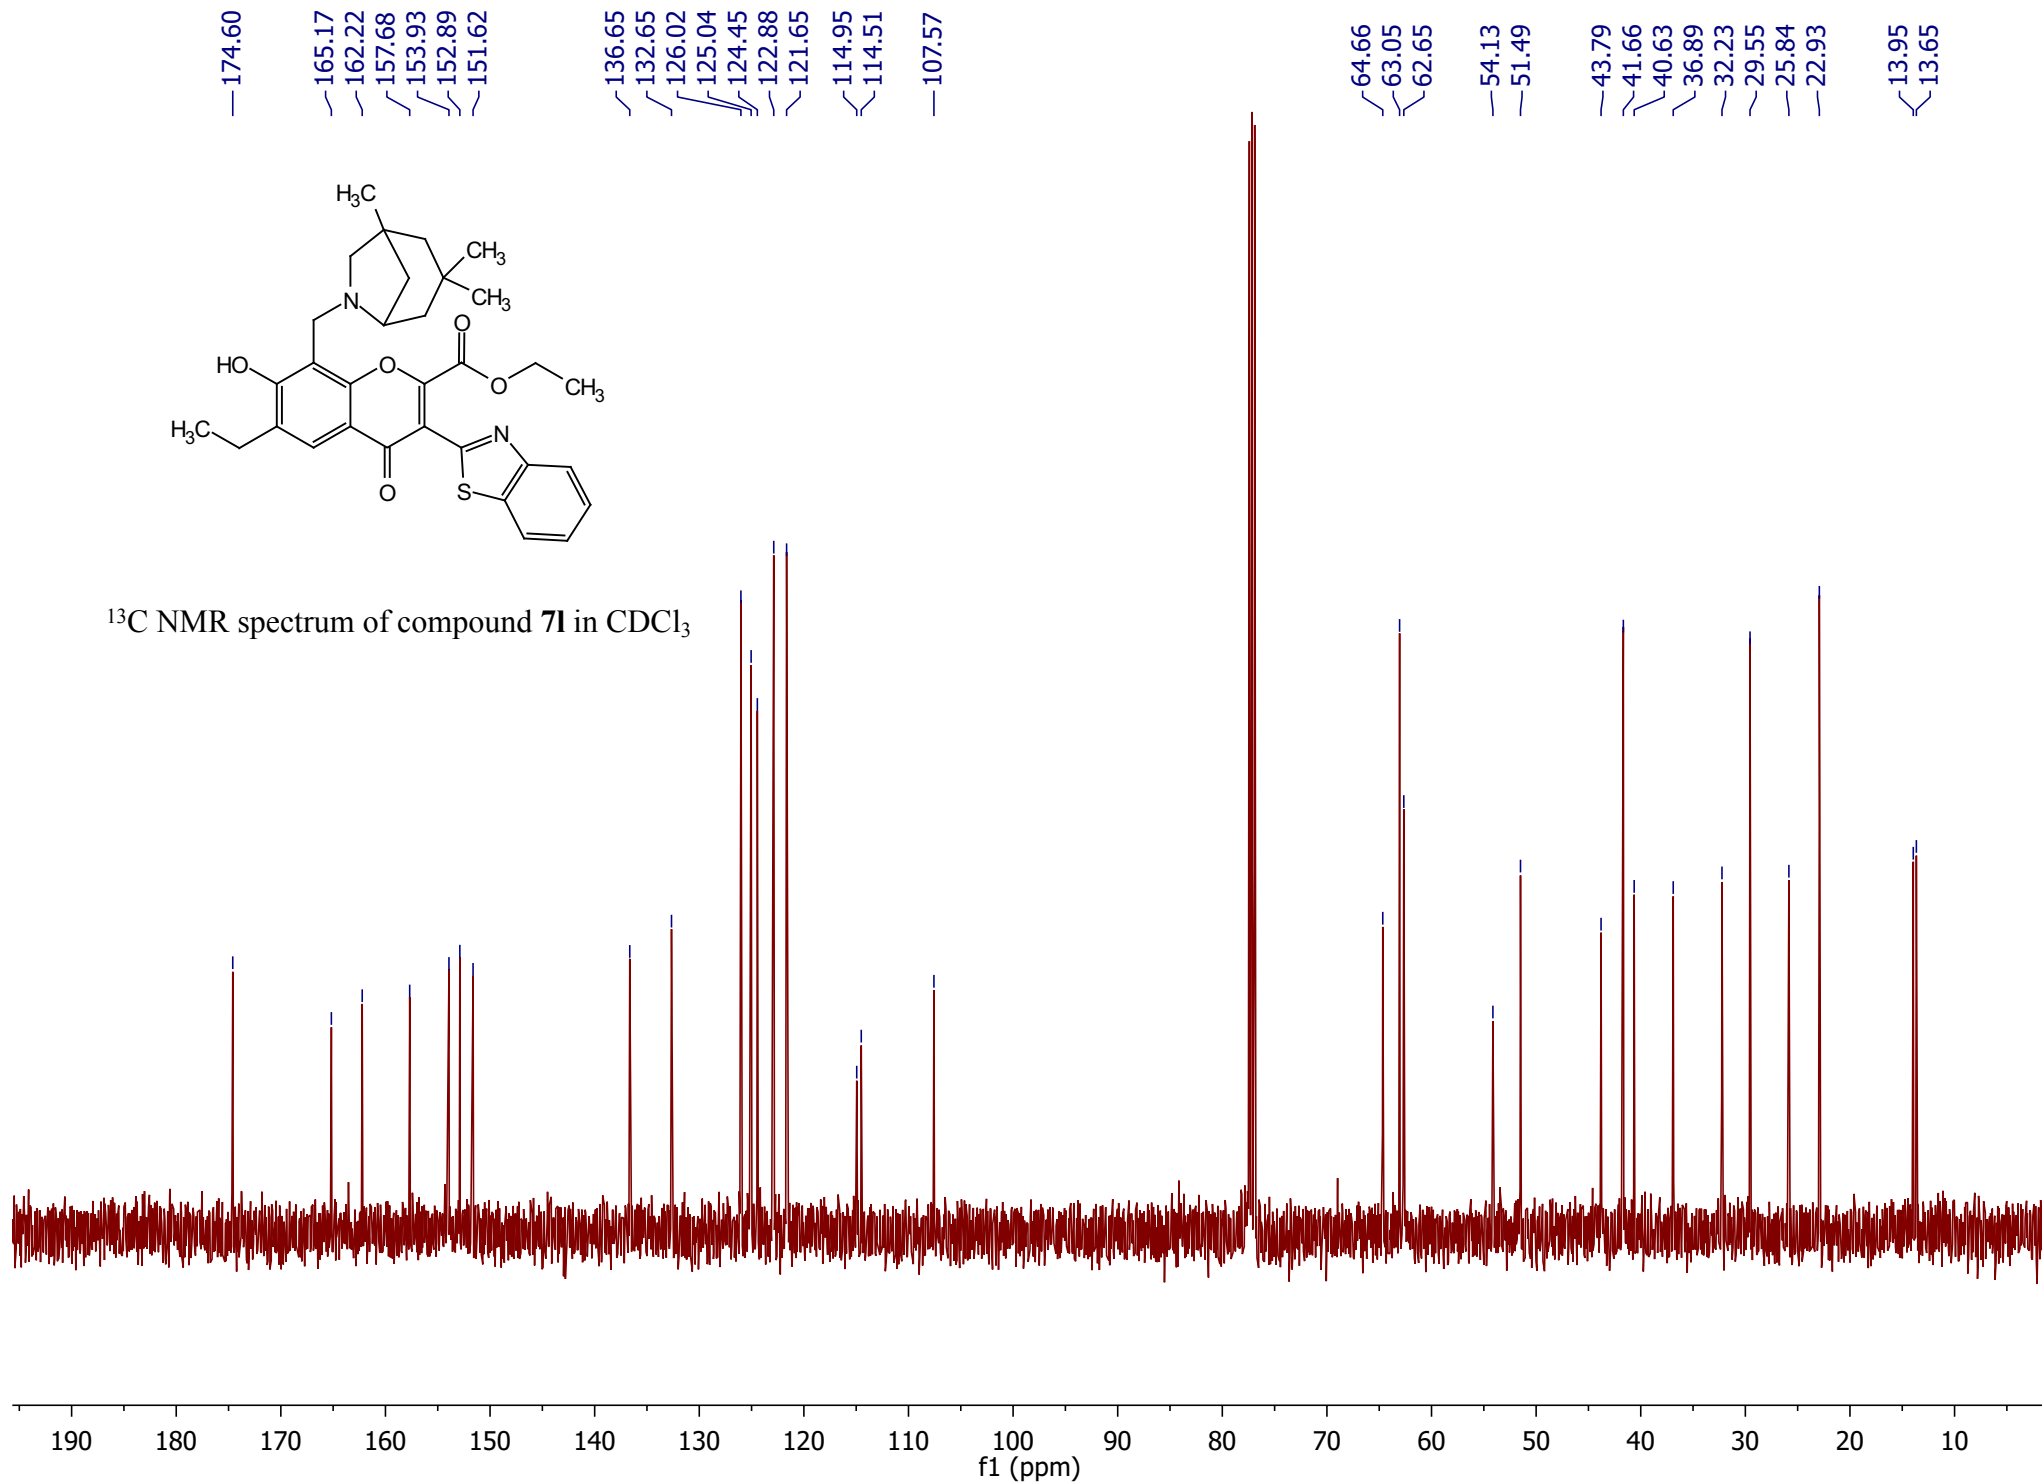

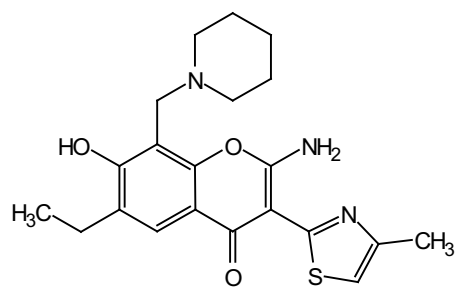

$^1\text{H}$  NMR spectrum of compound **7m** in  $\text{CDCl}_3$

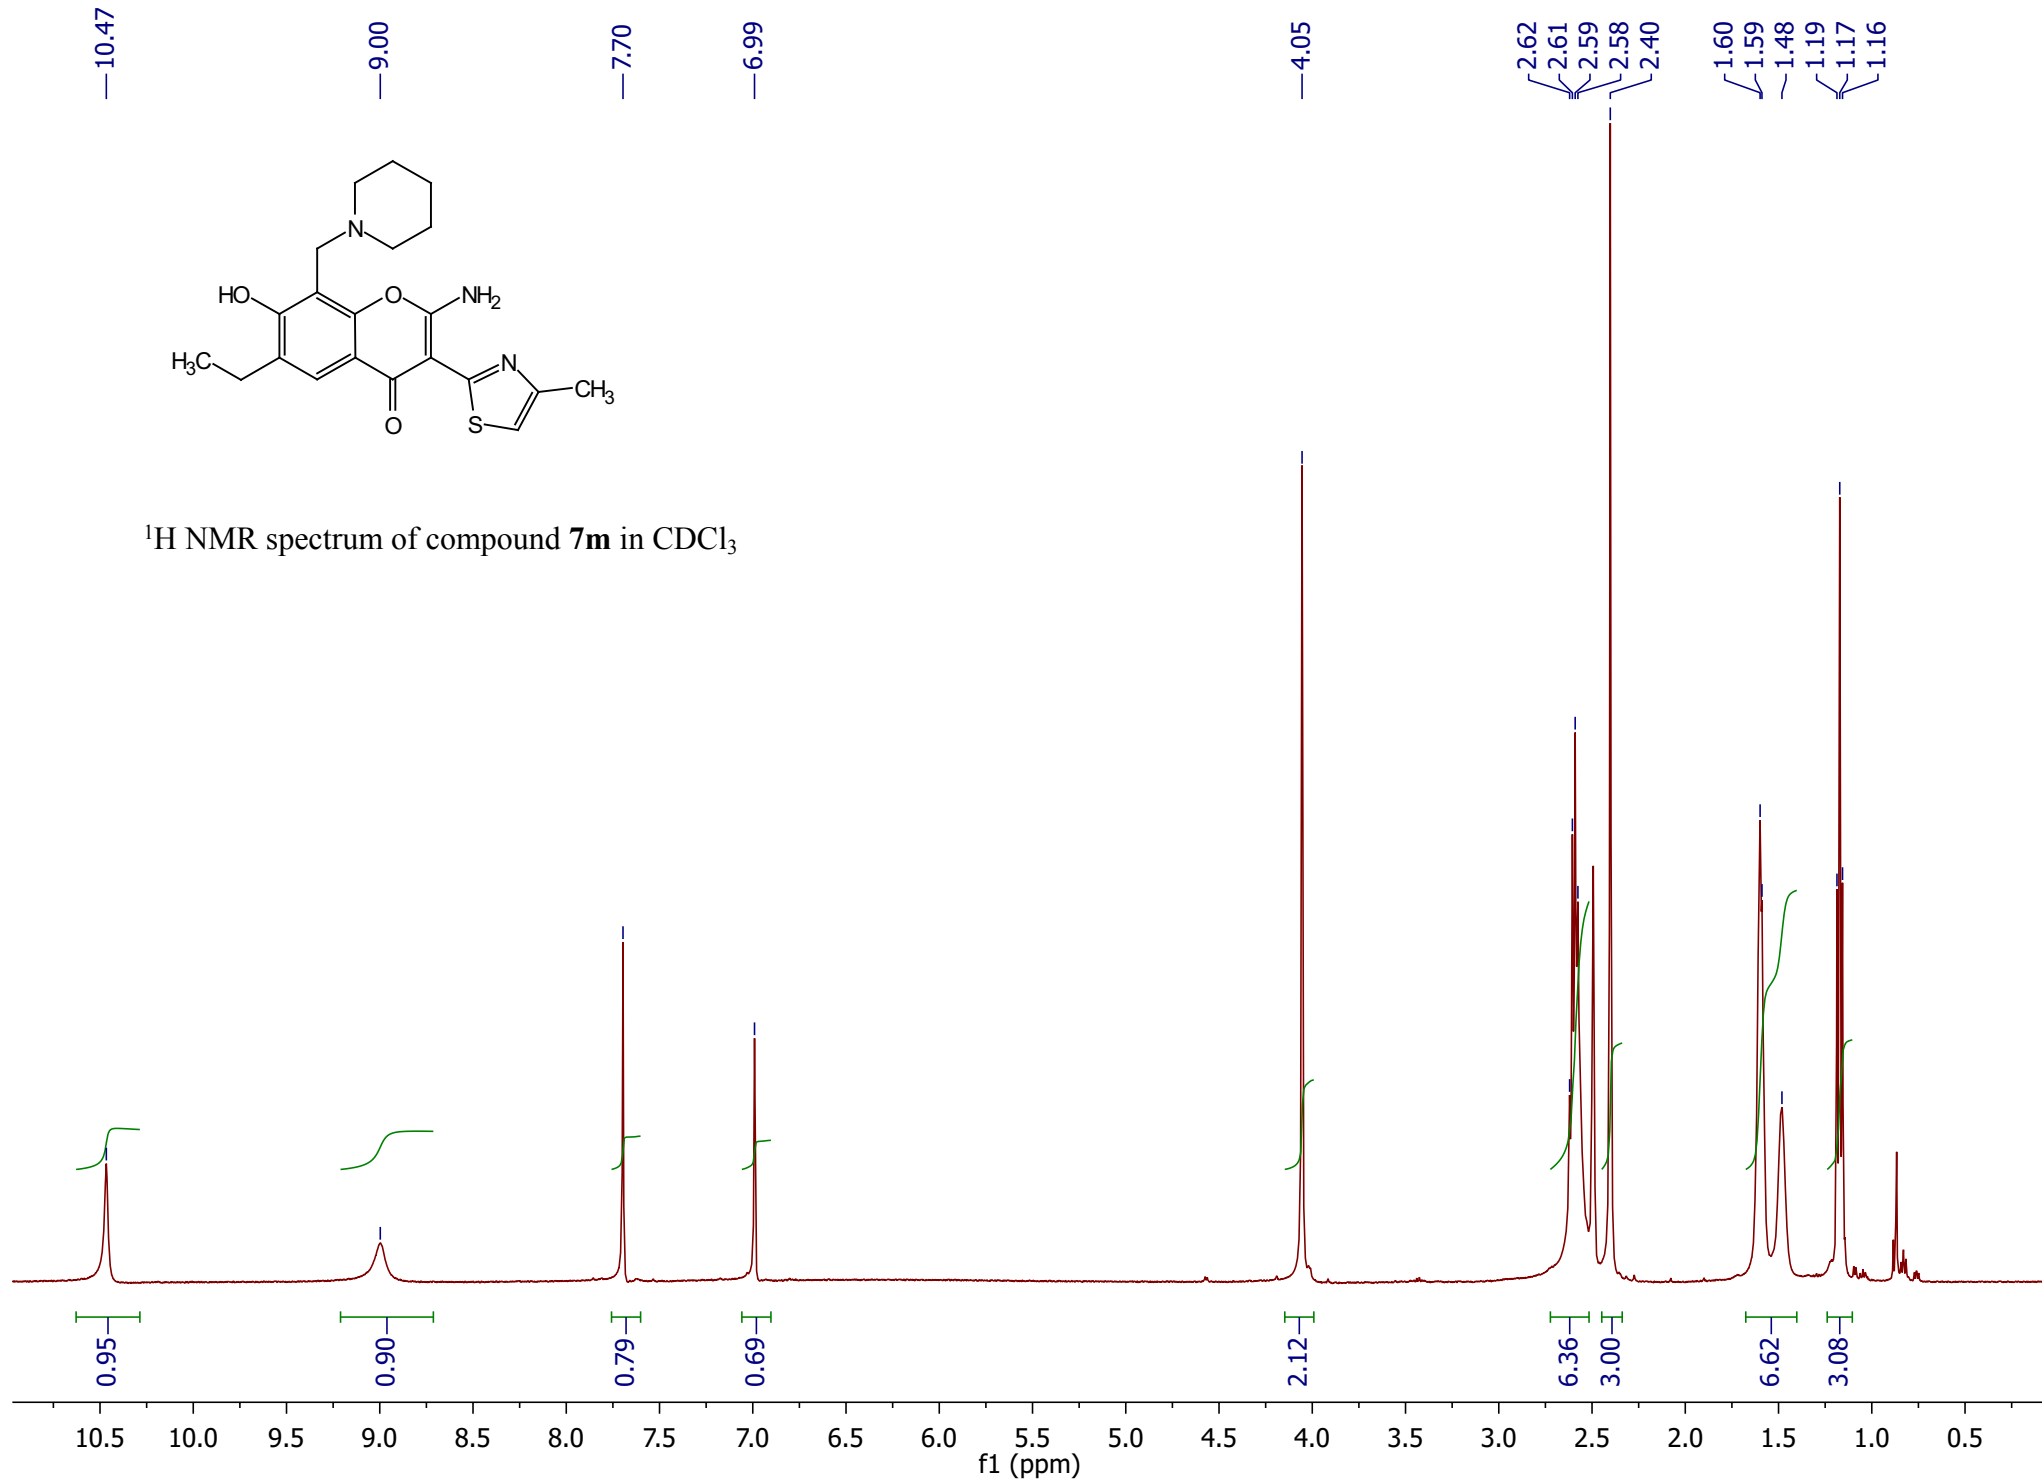

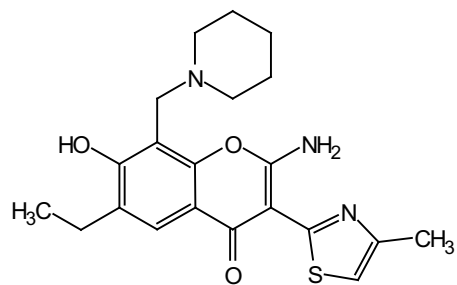

$^{13}\text{C}$  NMR spectrum of compound **7m** in  $\text{CDCl}_3$

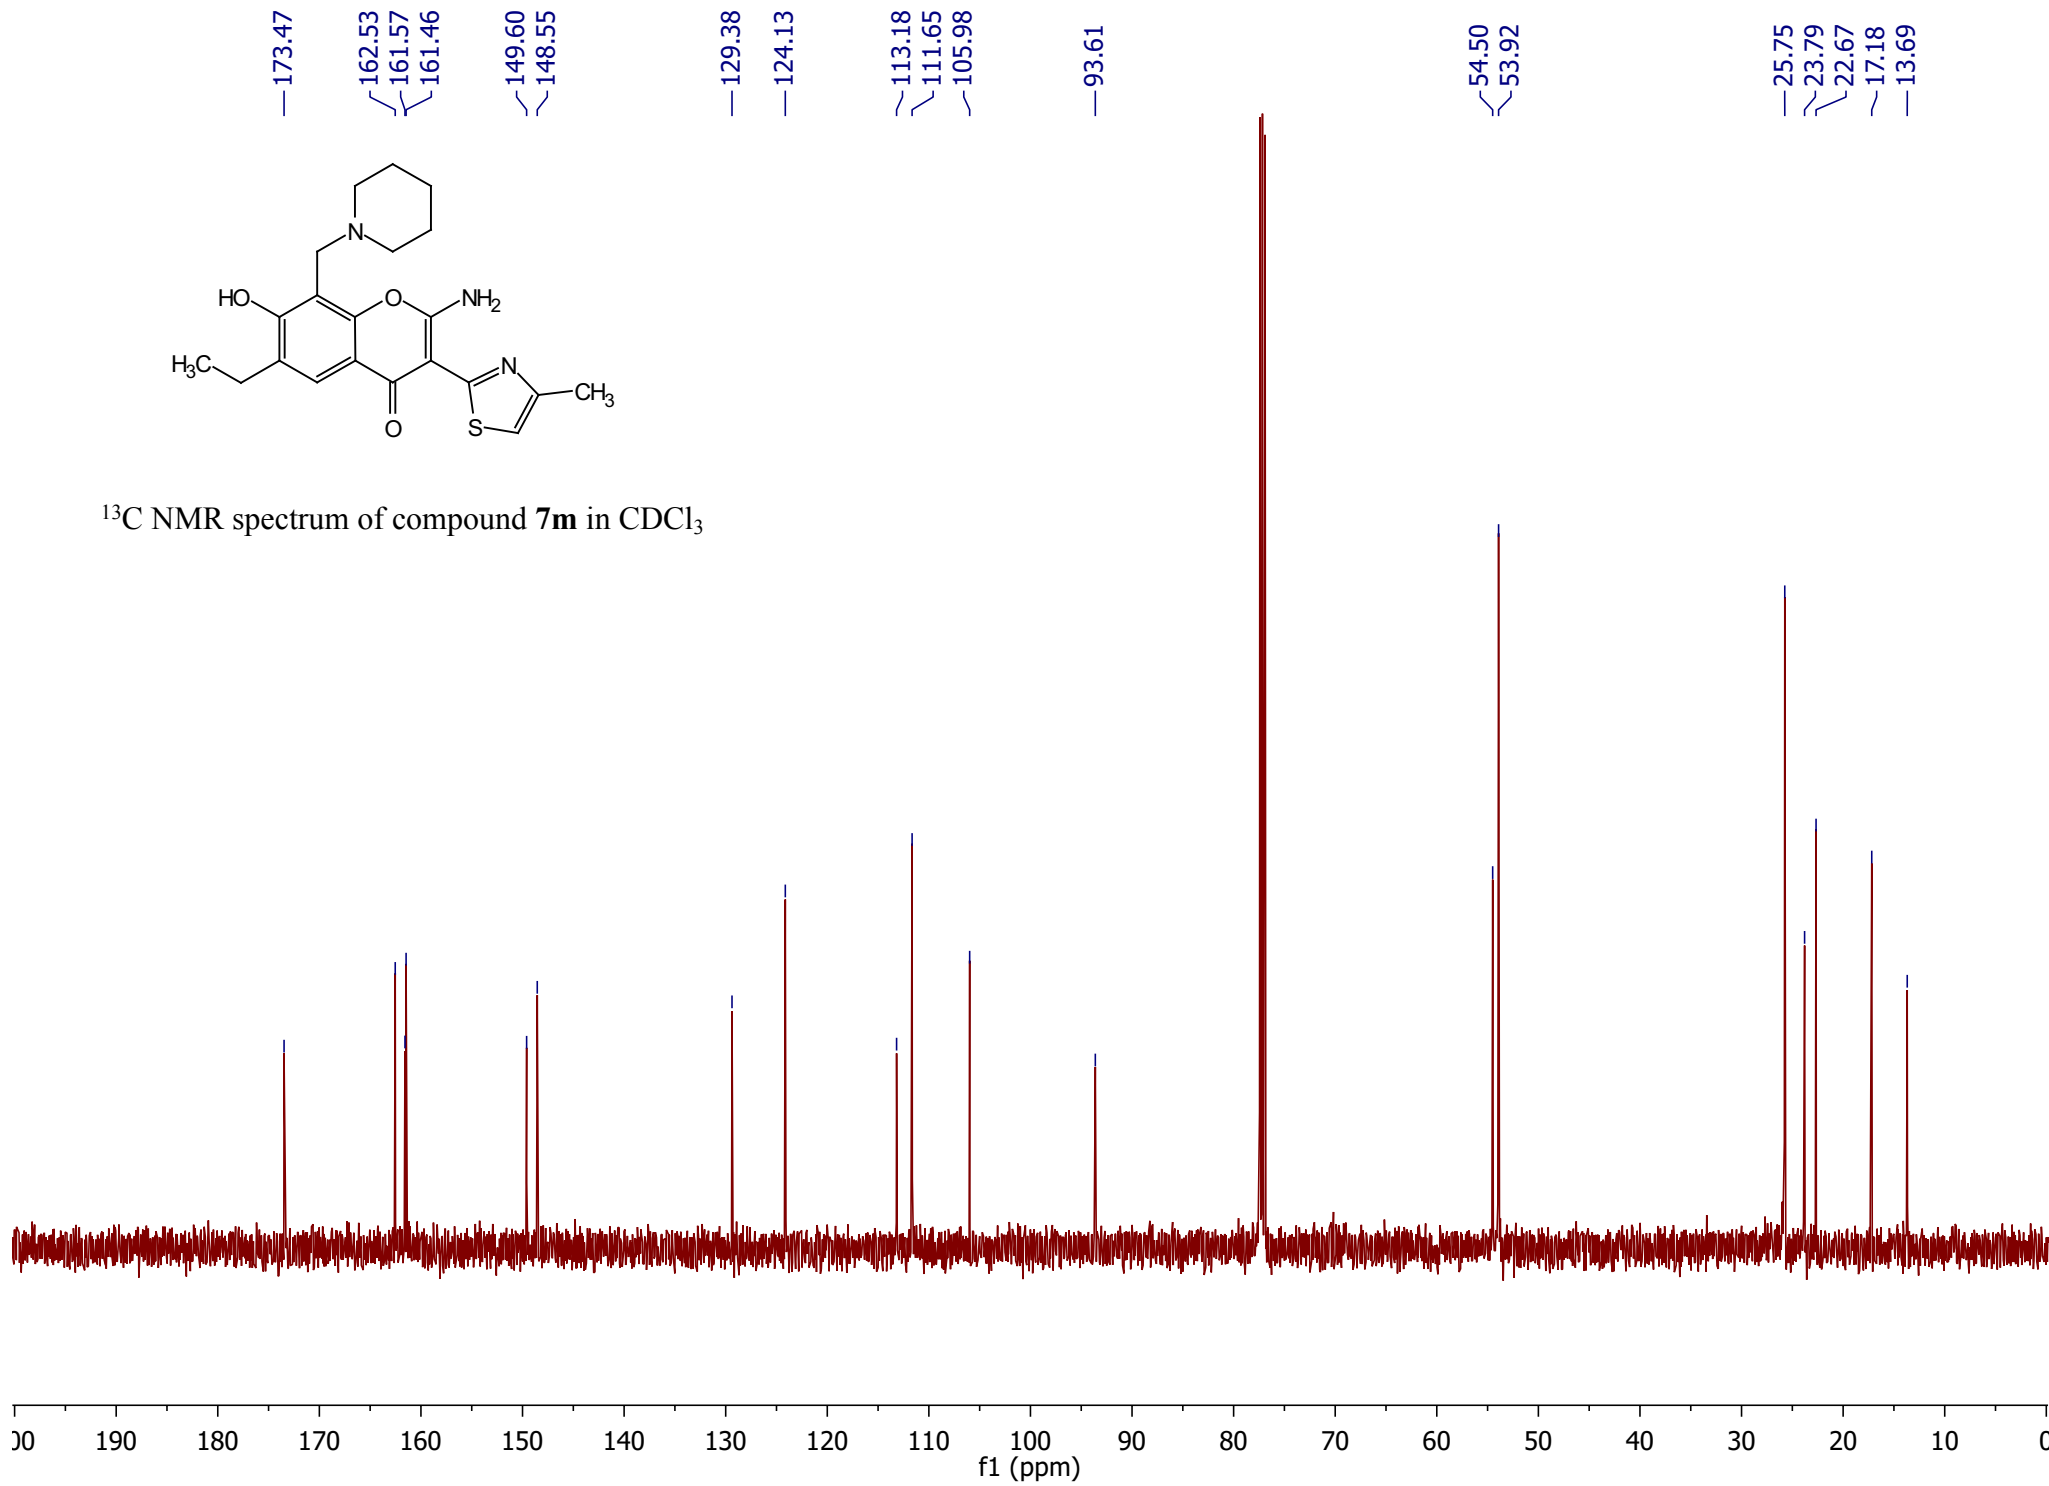

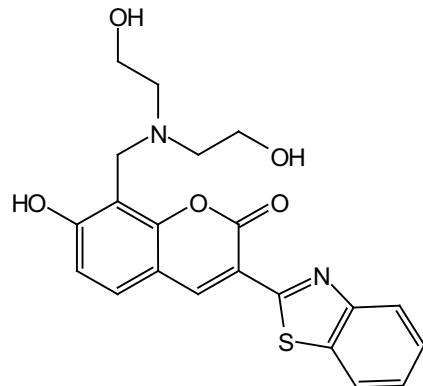

$^1\text{H}$  NMR spectrum of compound **10a** in  $\text{DMSO-d}_6$

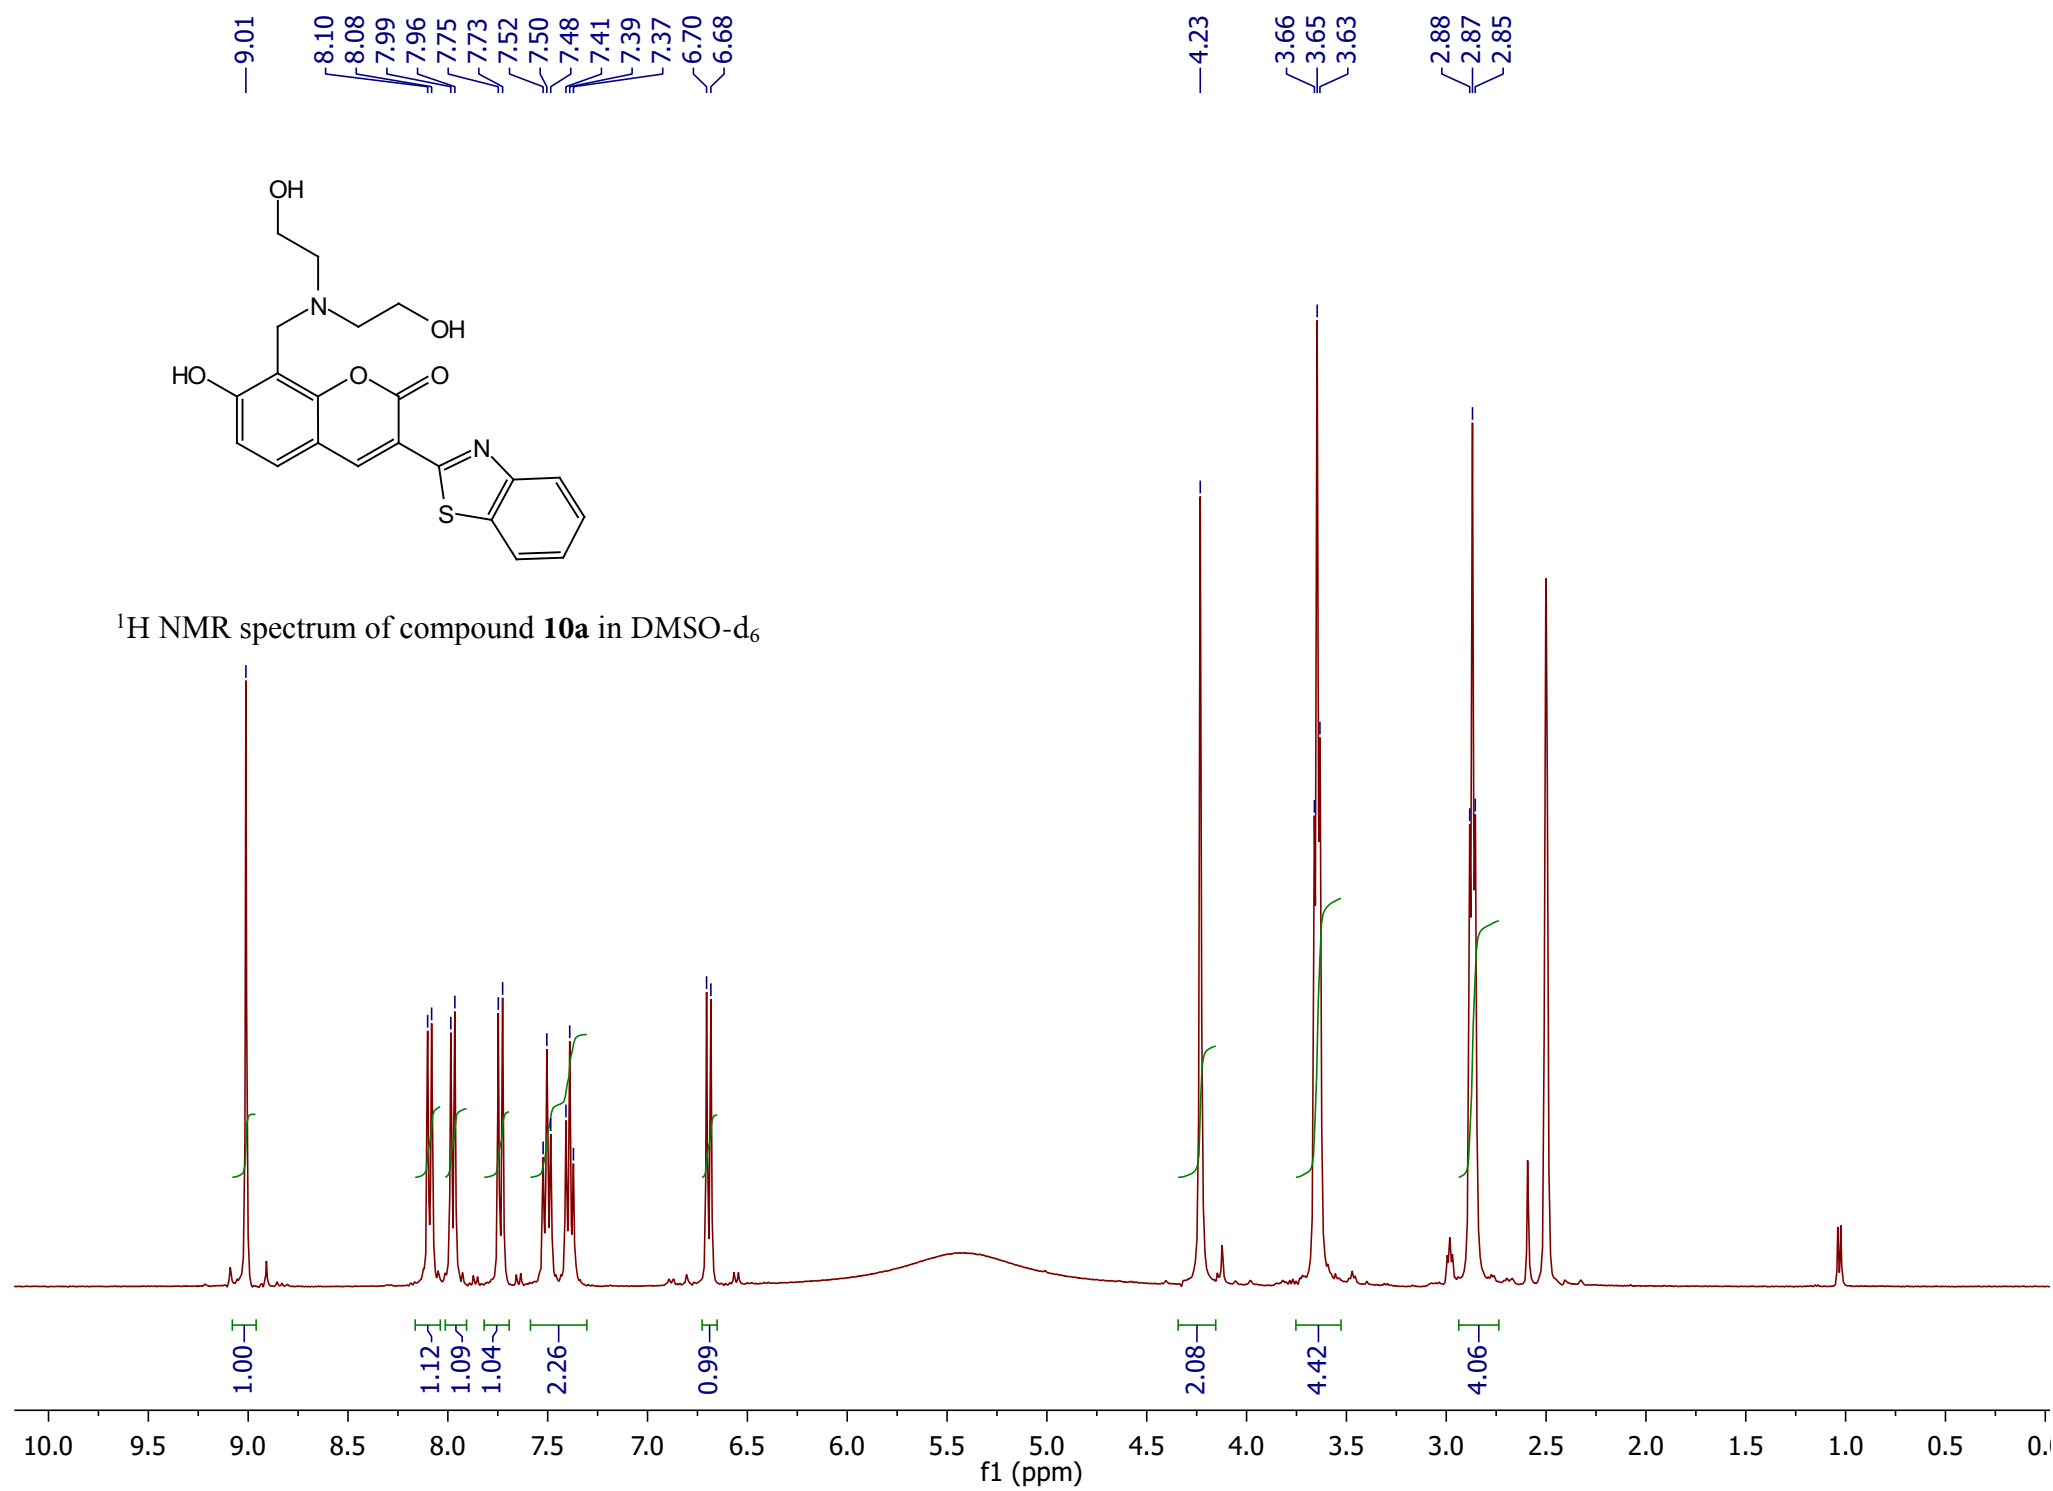



$^{13}\text{C}$  NMR spectrum of compound **10a** in  $\text{DMSO-d}_6$

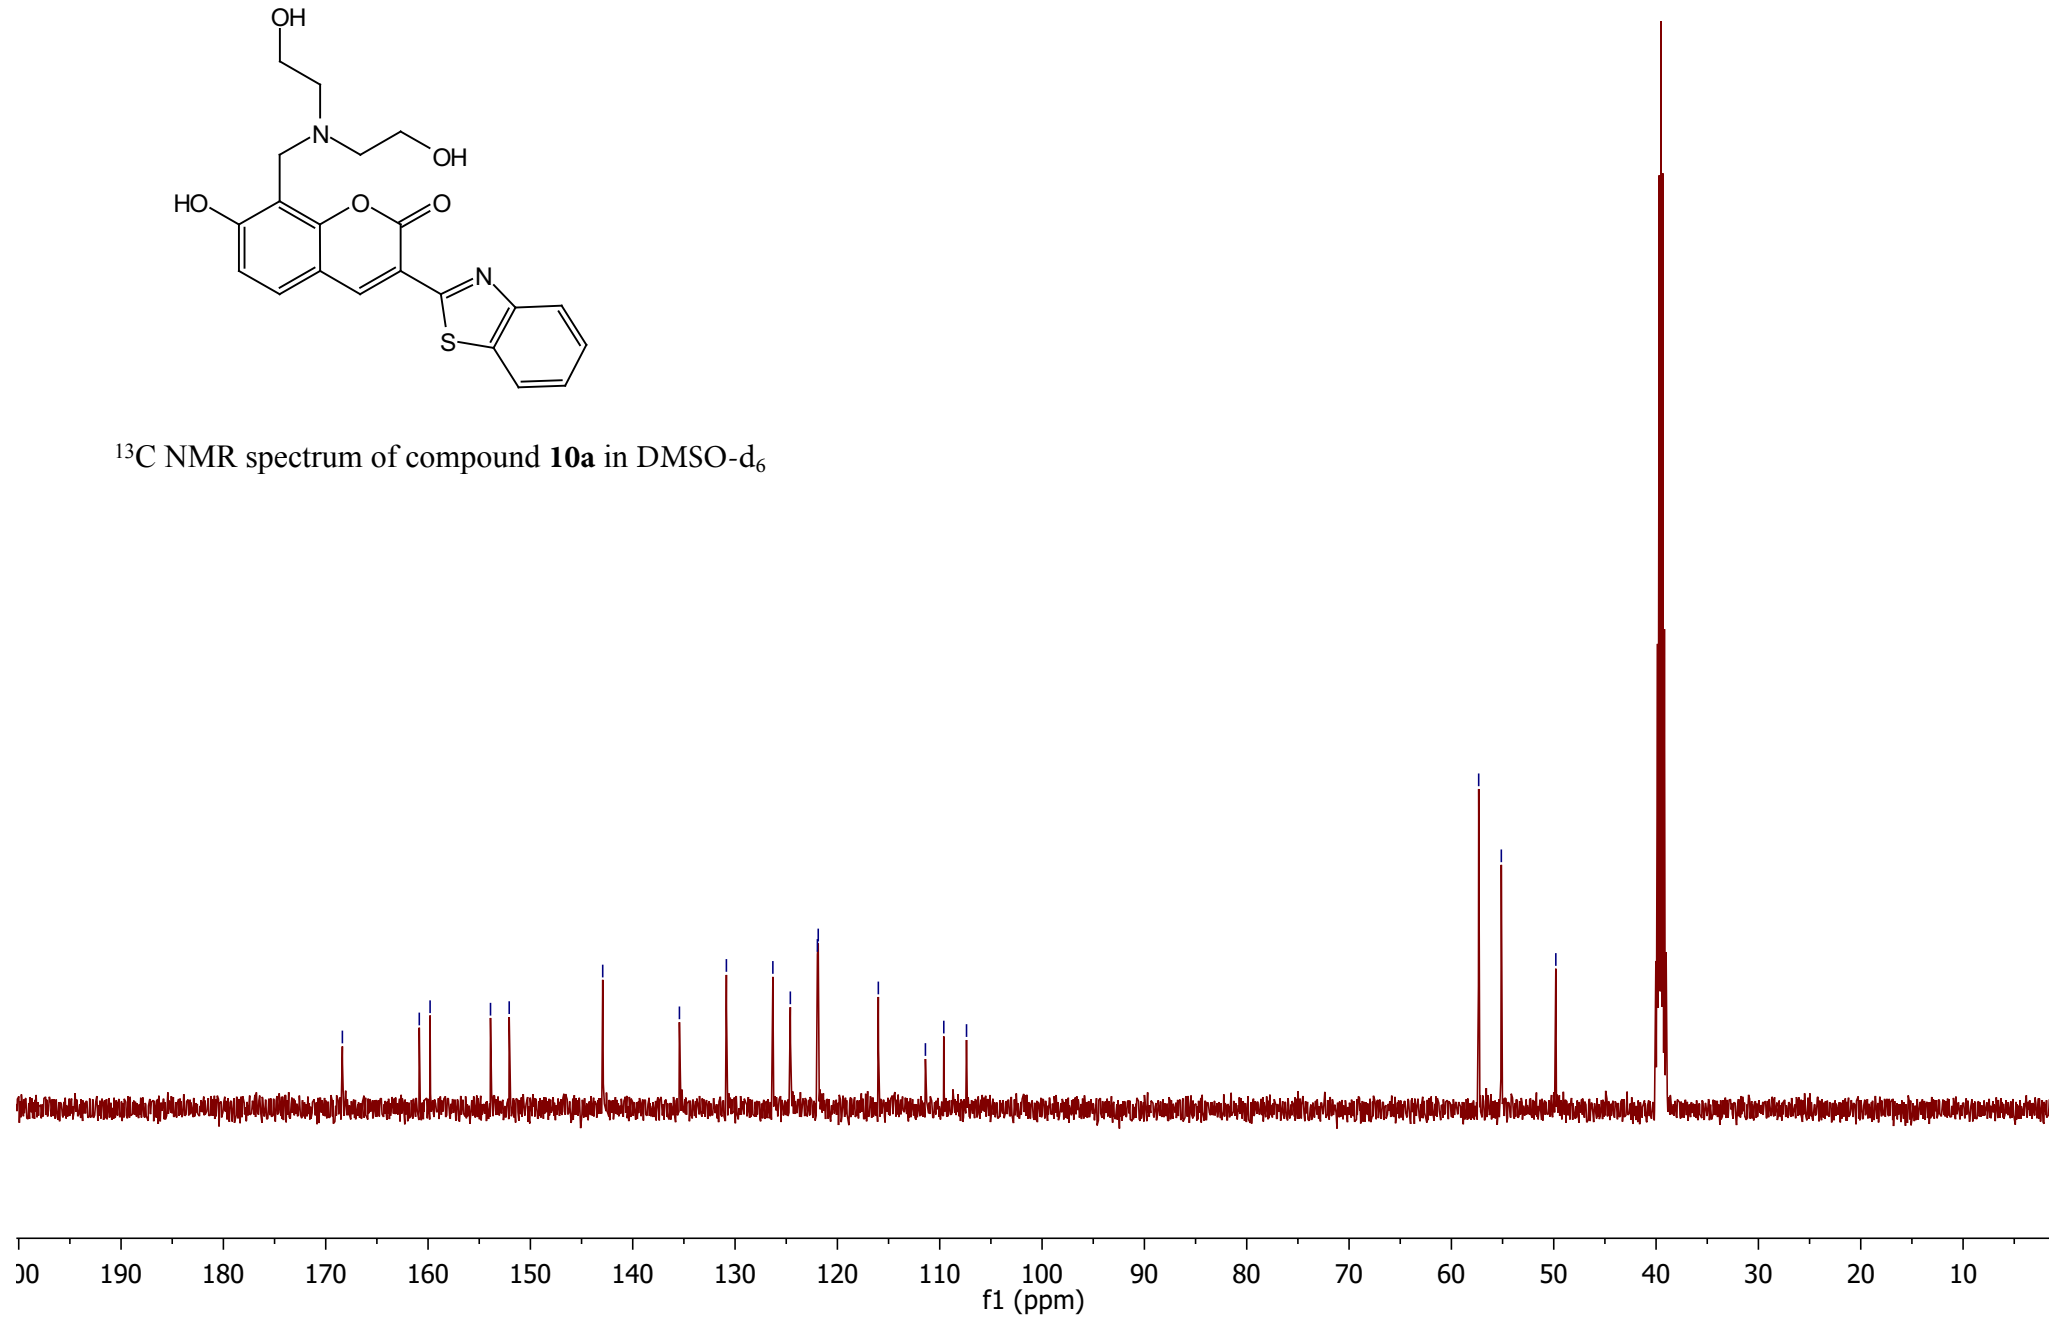

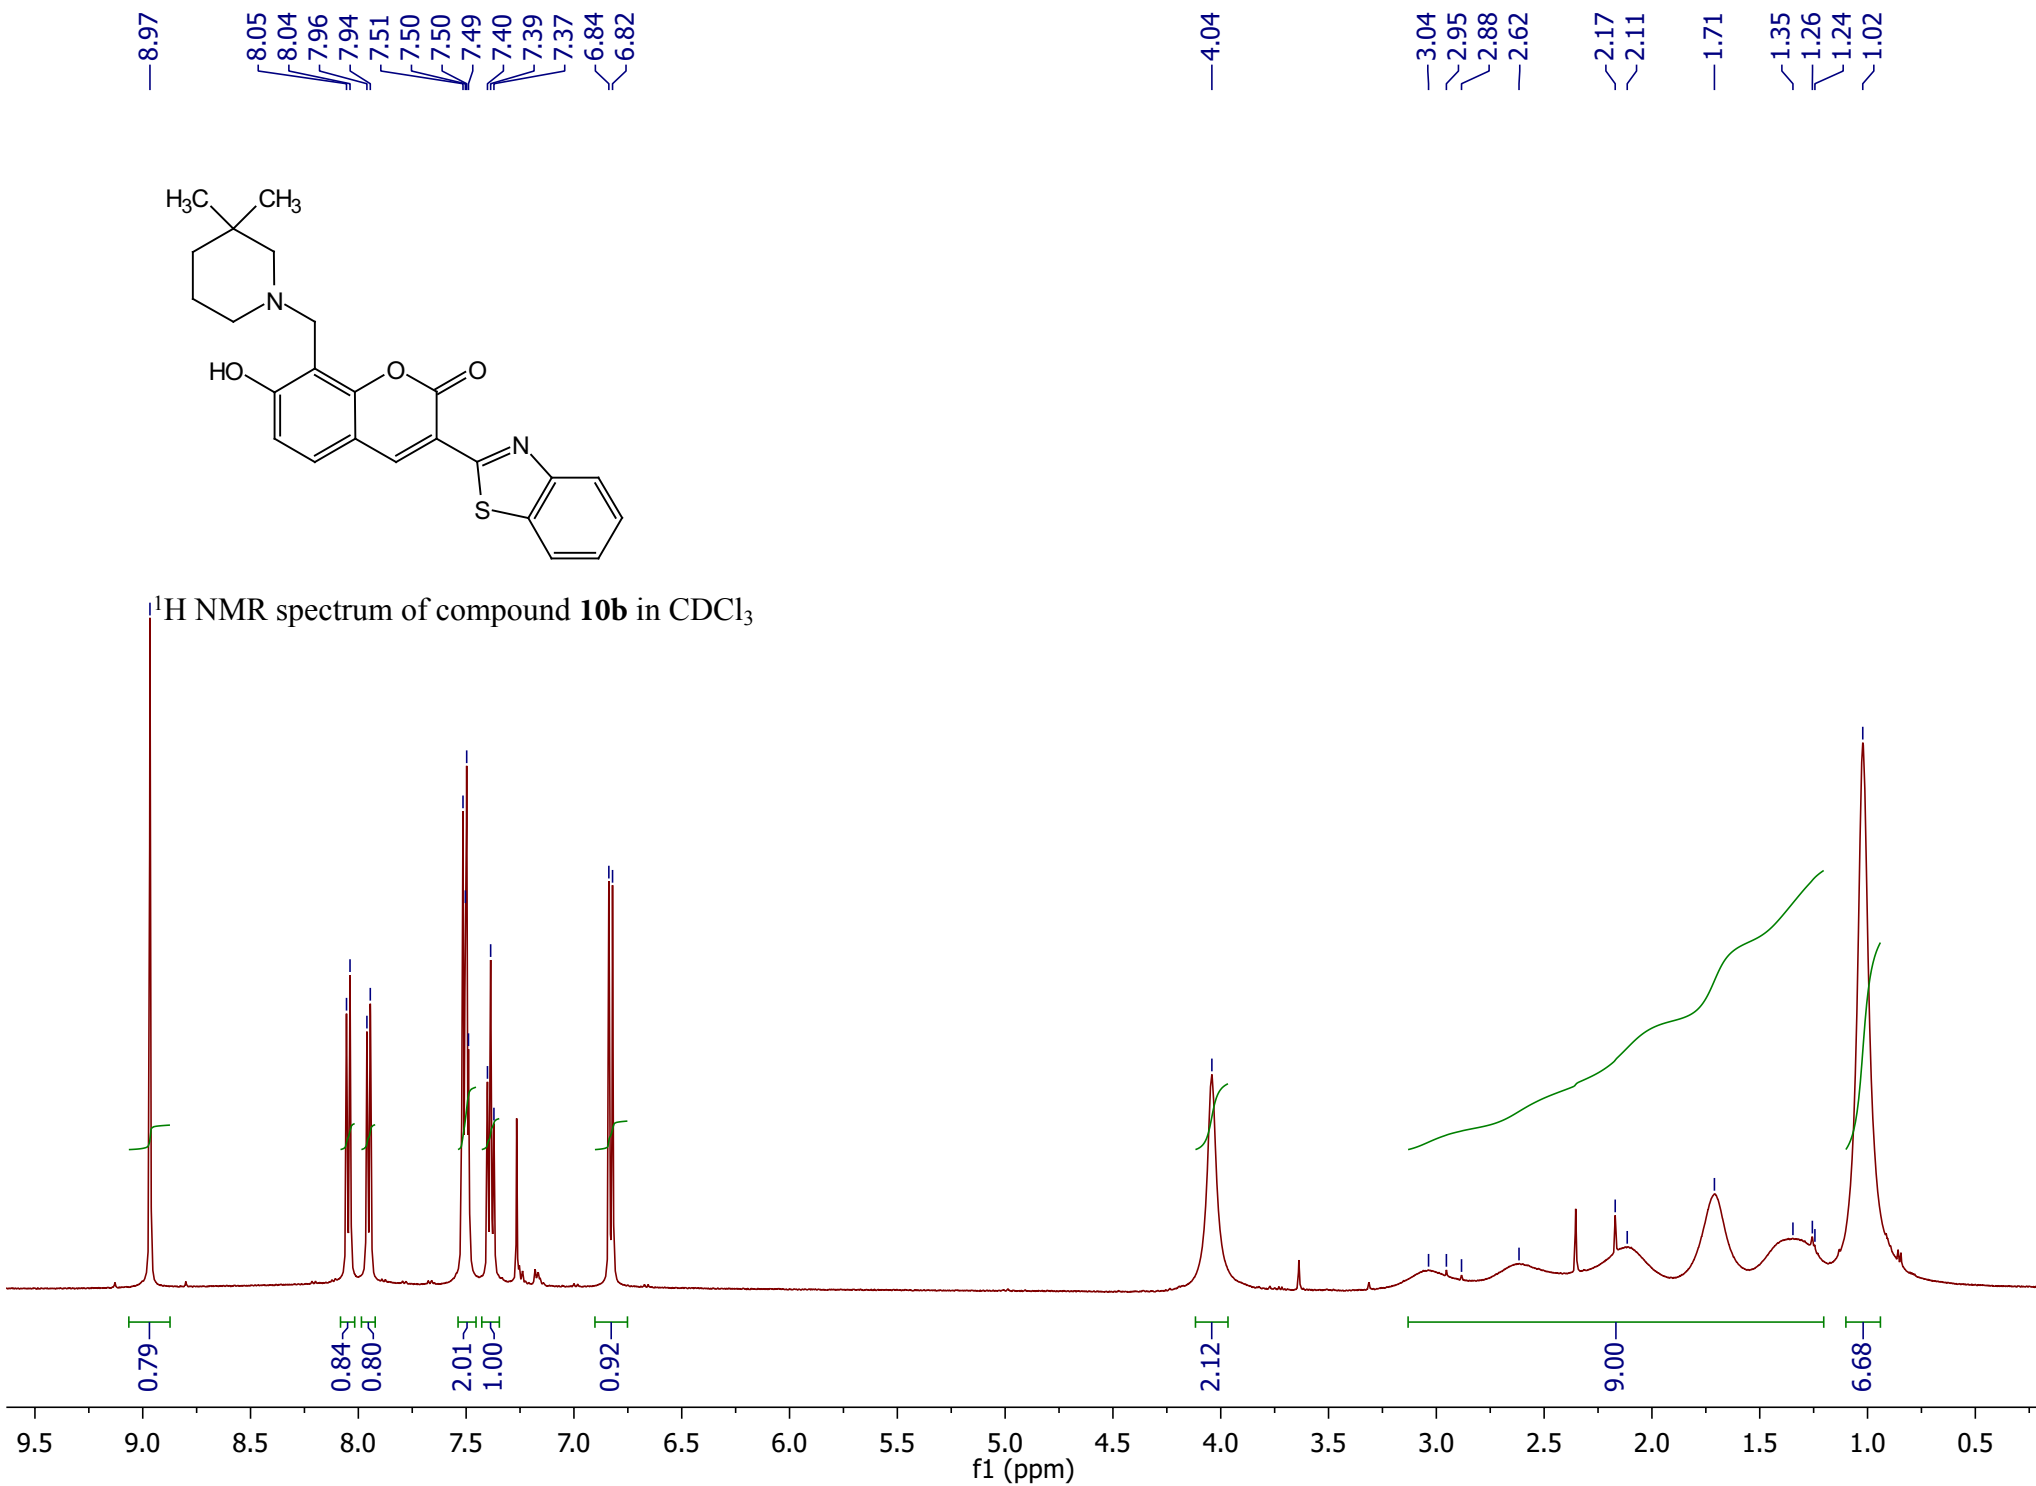

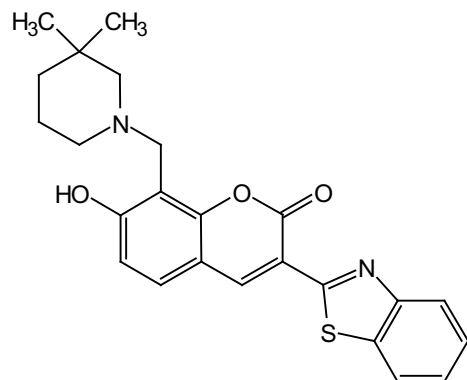

$^{13}\text{C}$  NMR spectrum of compound **10b** in  $\text{CDCl}_3$

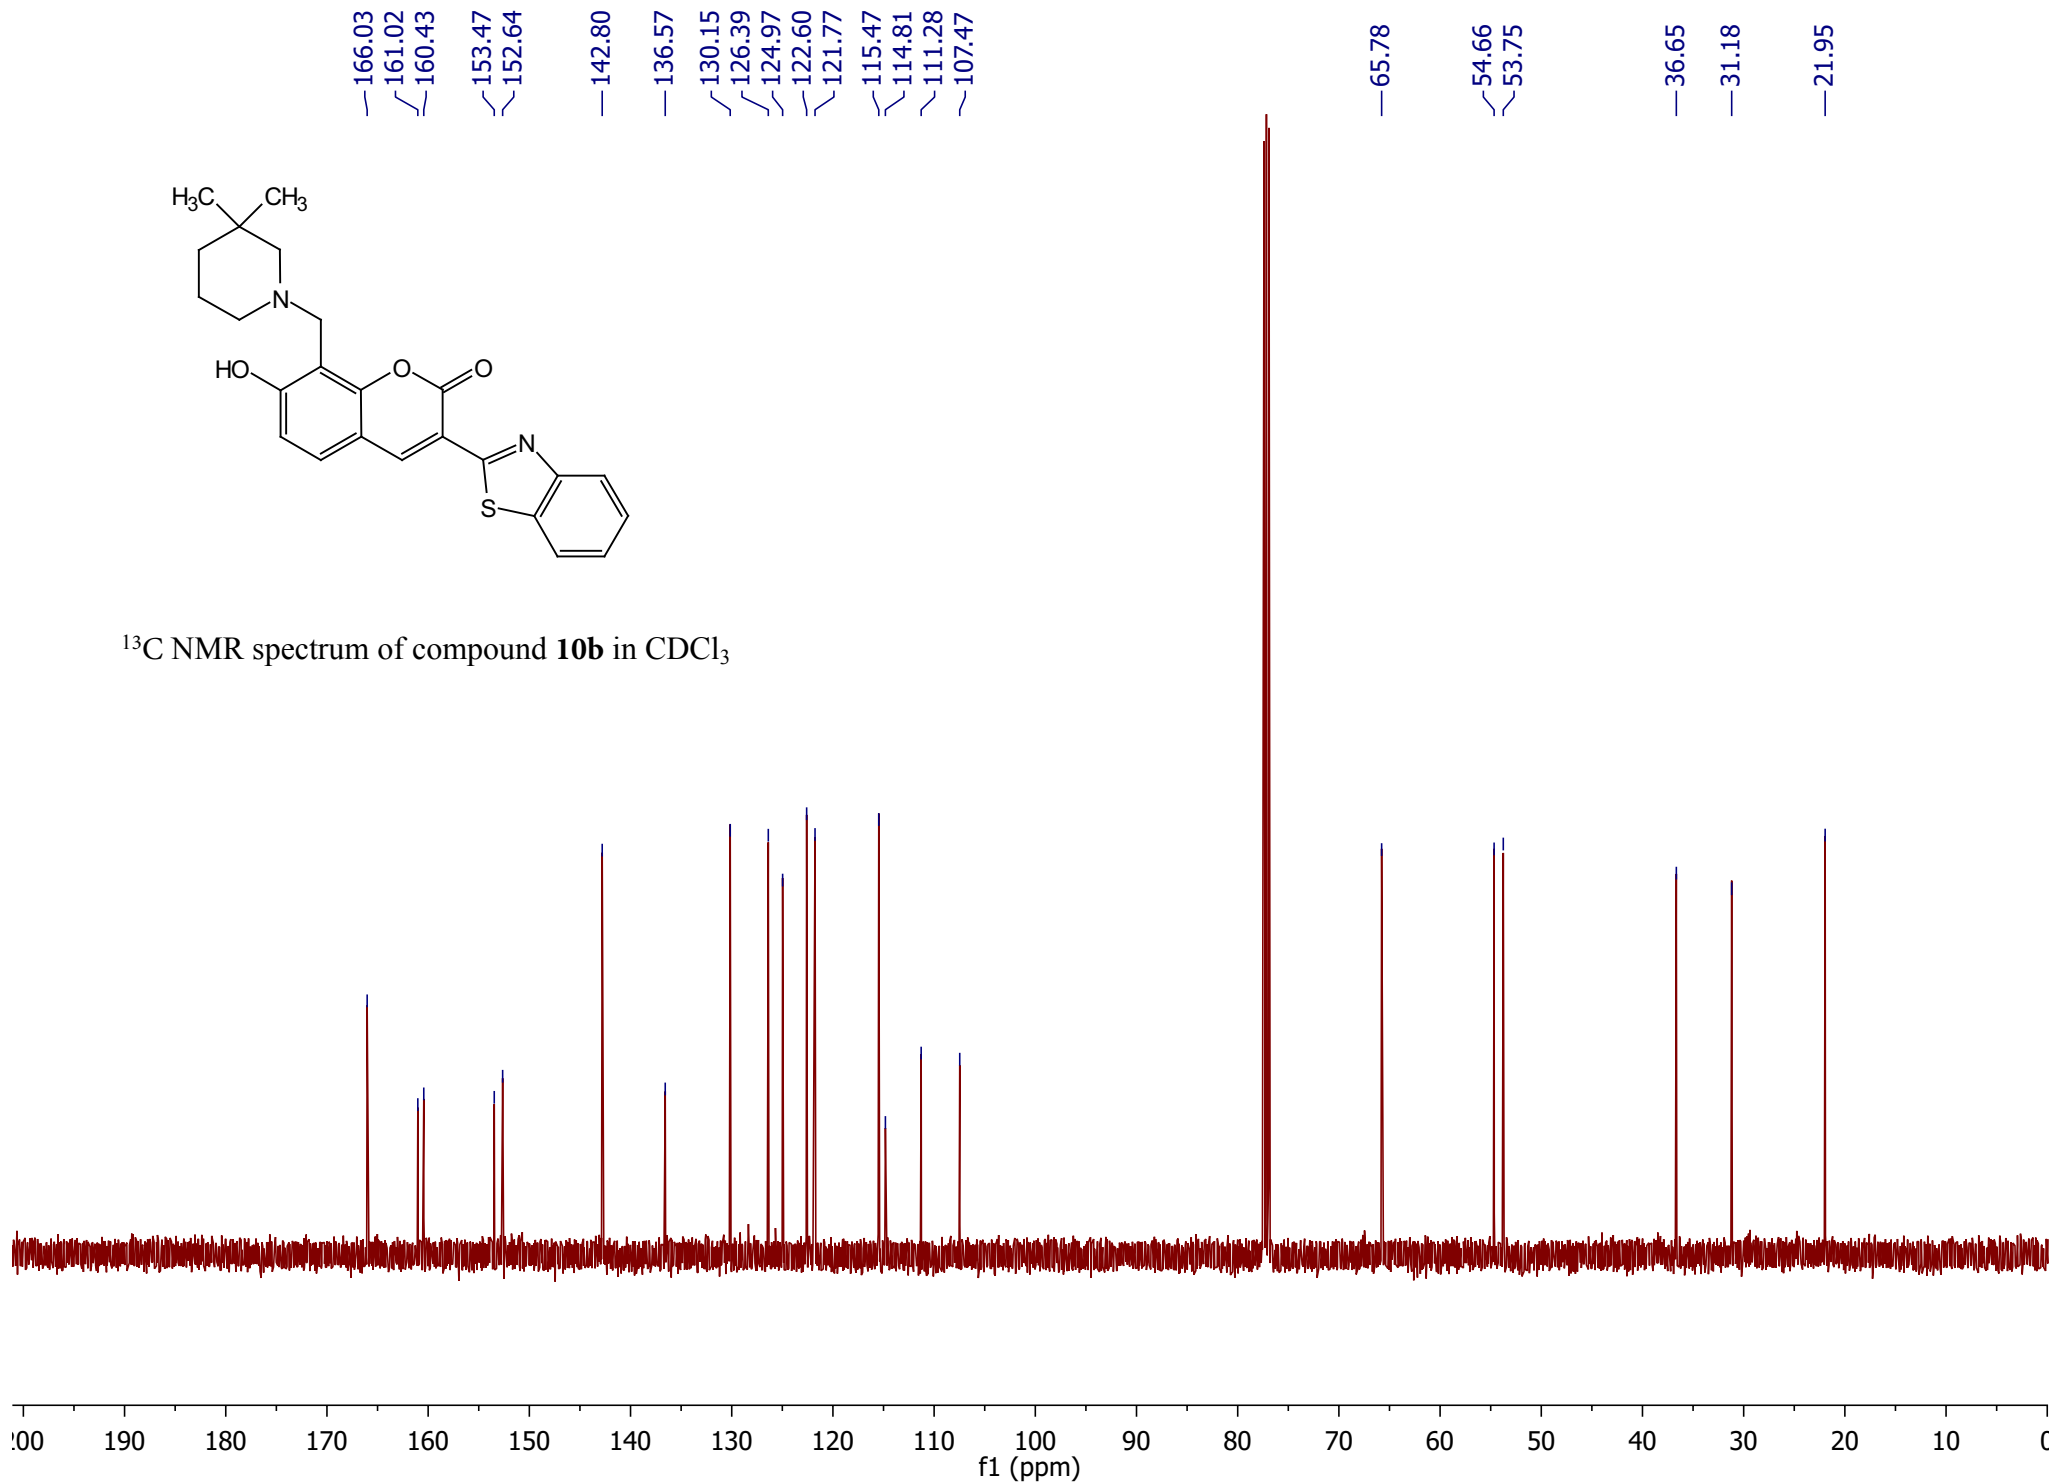

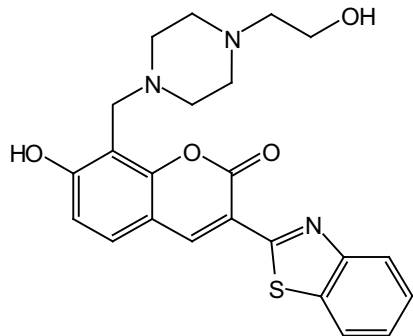

$^1\text{H}$  NMR spectrum of compound **10c** in  $\text{DMSO-d}_6$

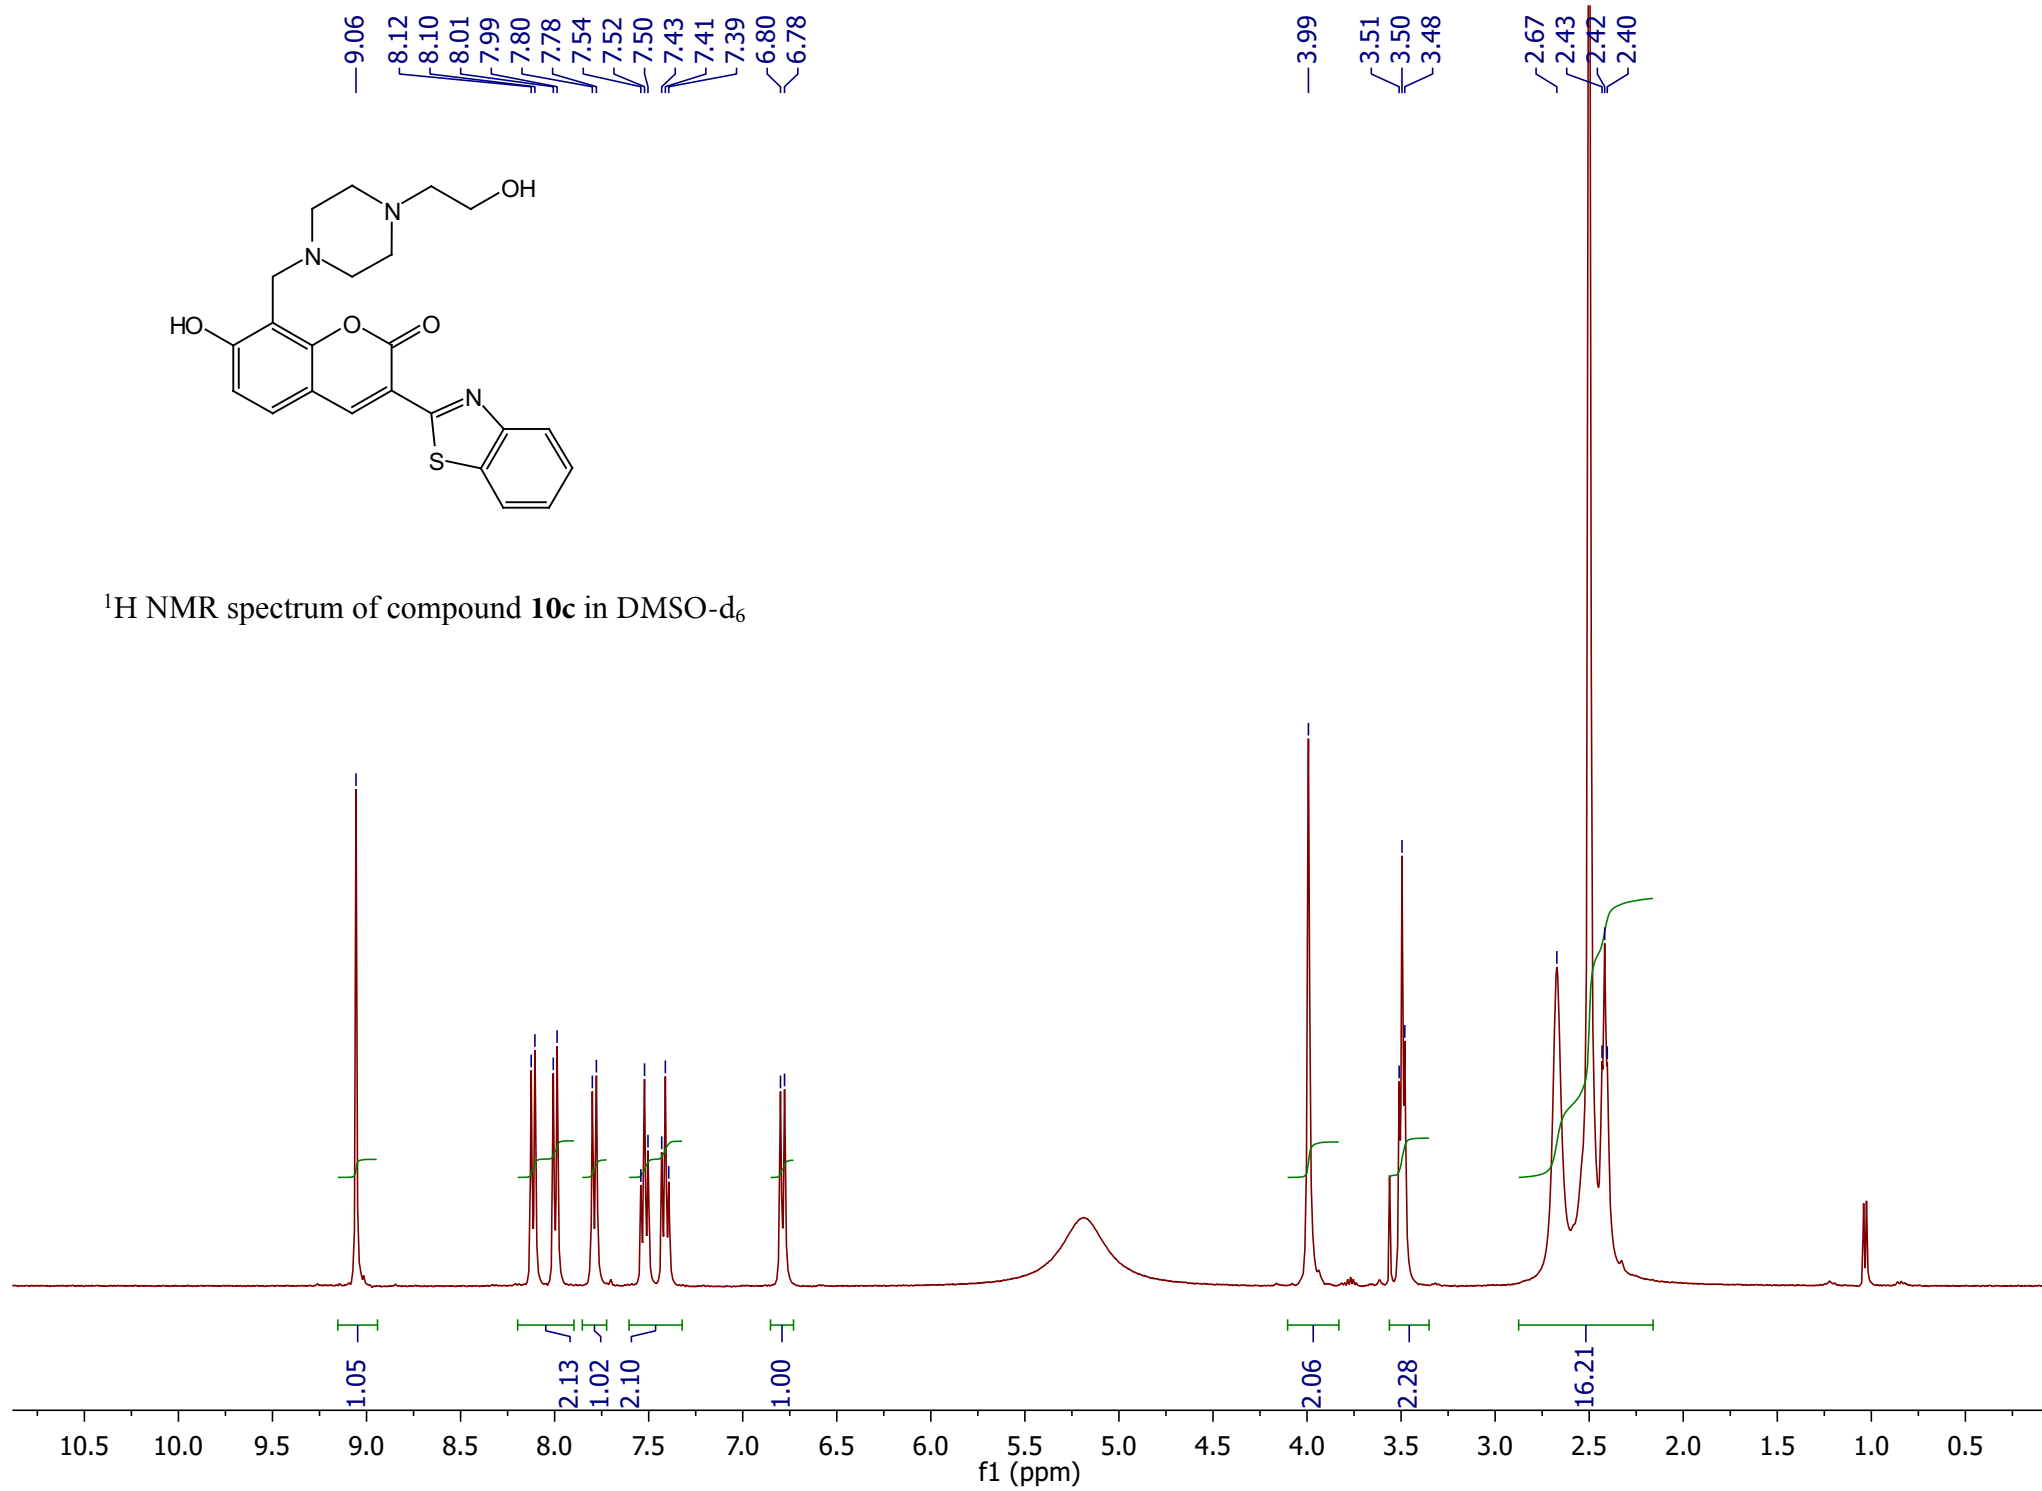



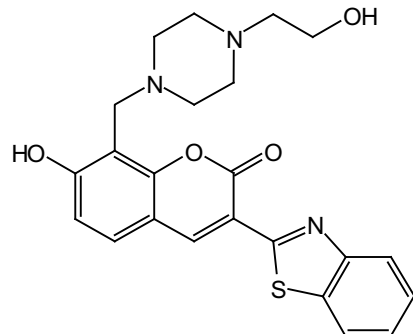

$^{13}\text{C}$  NMR spectrum of compound **10c** in DMSO- $\text{d}_6$

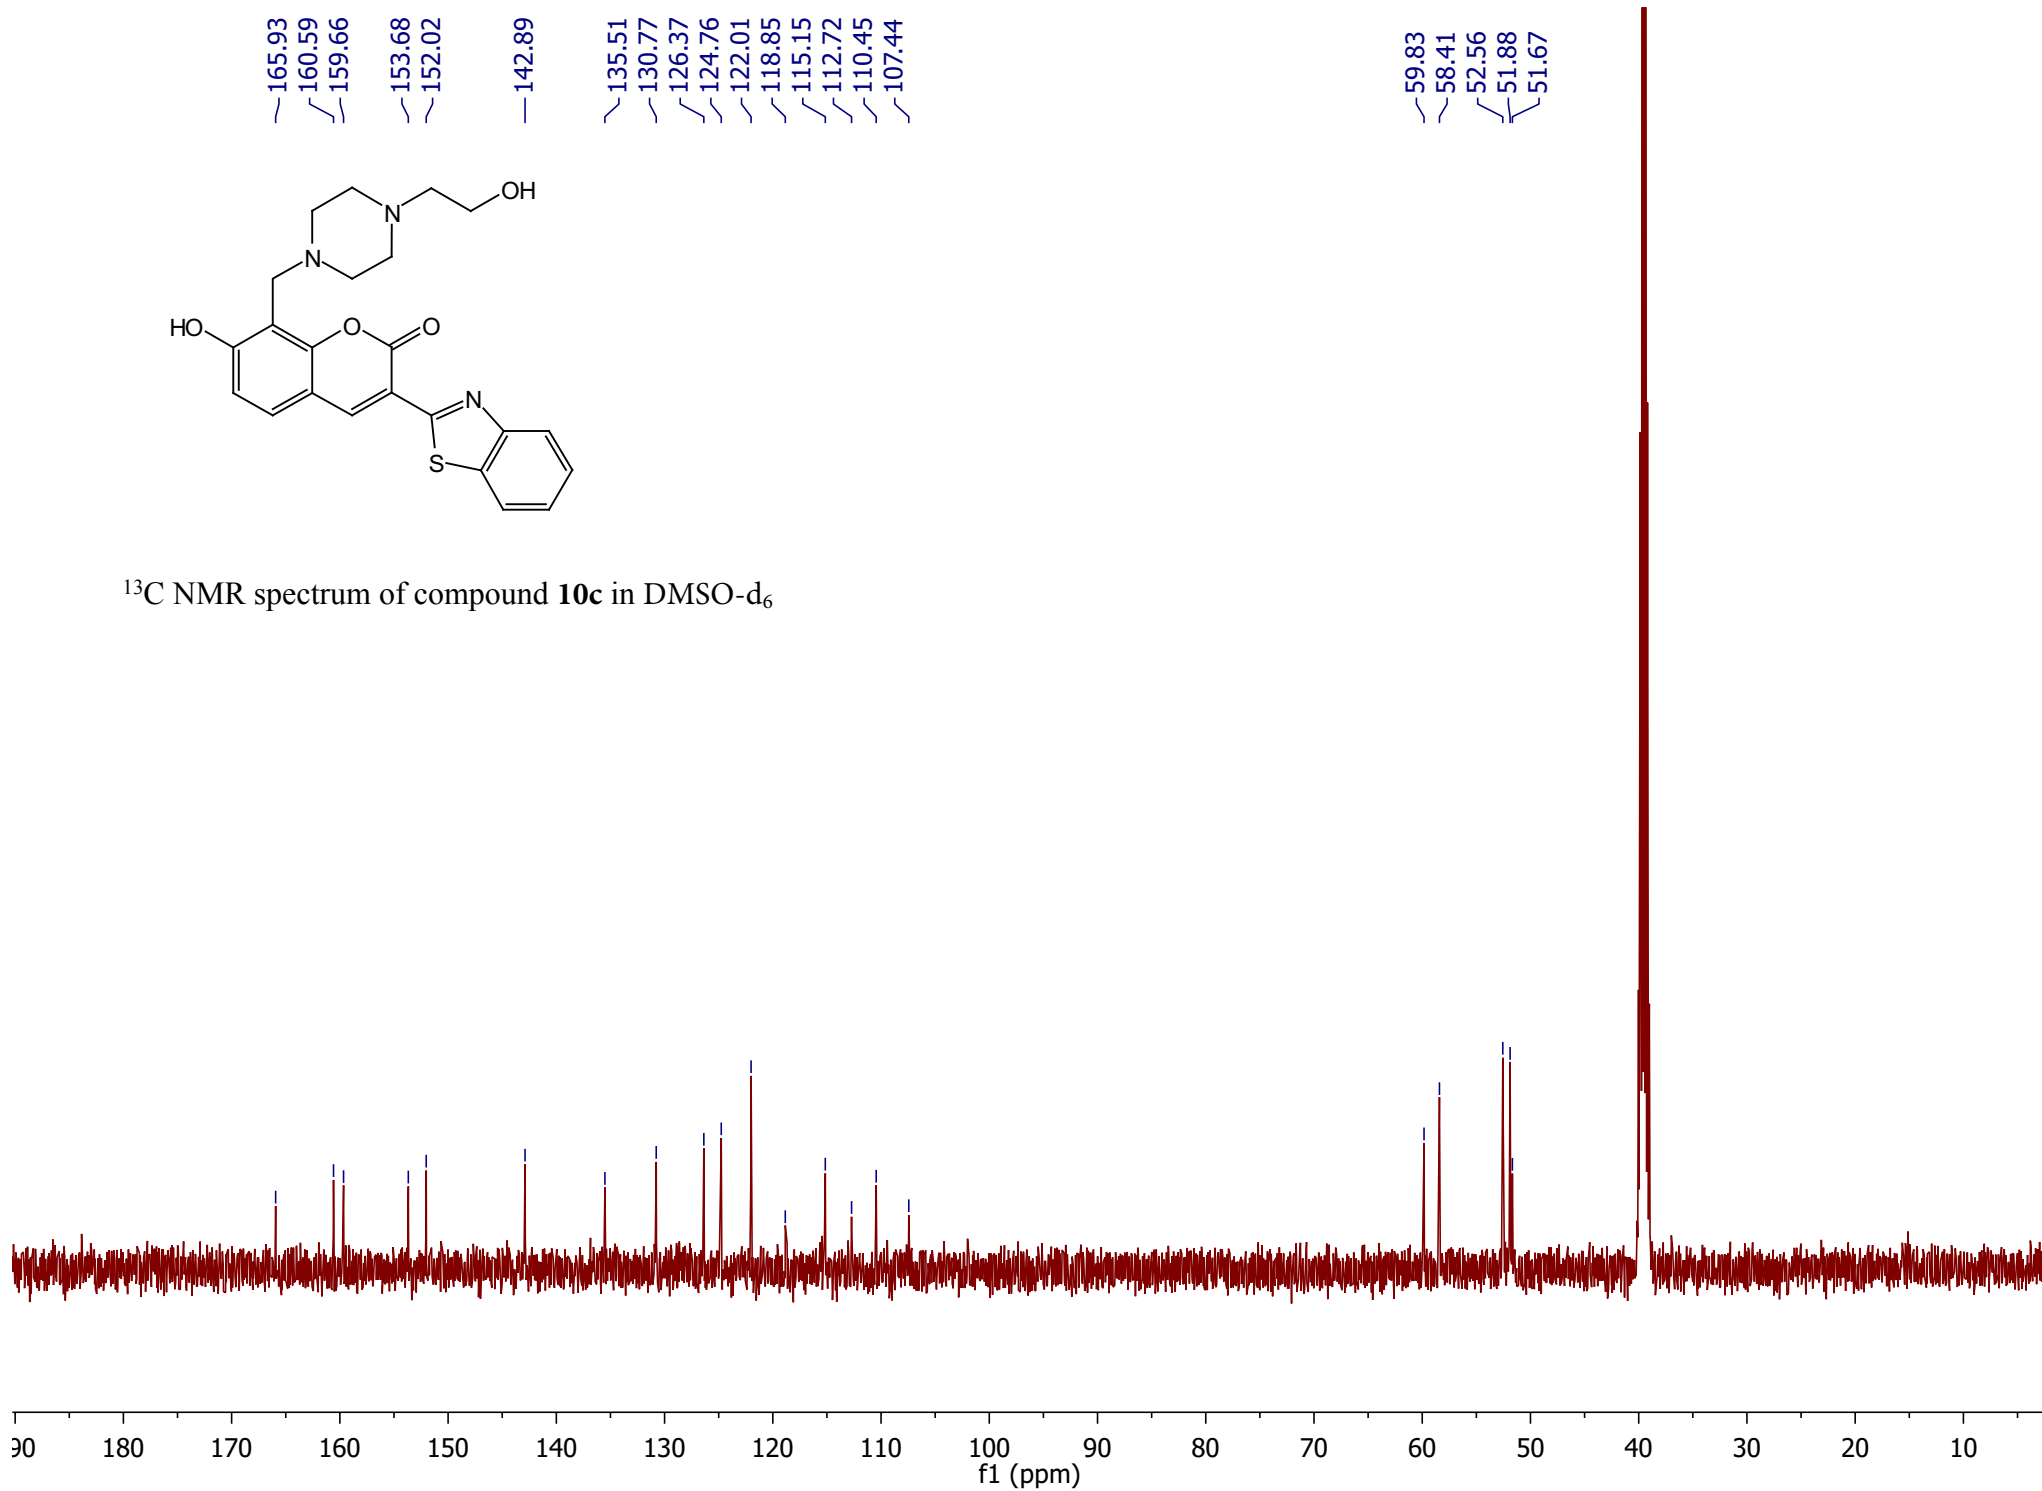

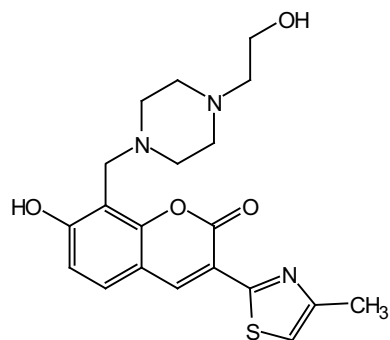

$^1\text{H}$  NMR spectrum of compound **11a** in  $\text{CDCl}_3$

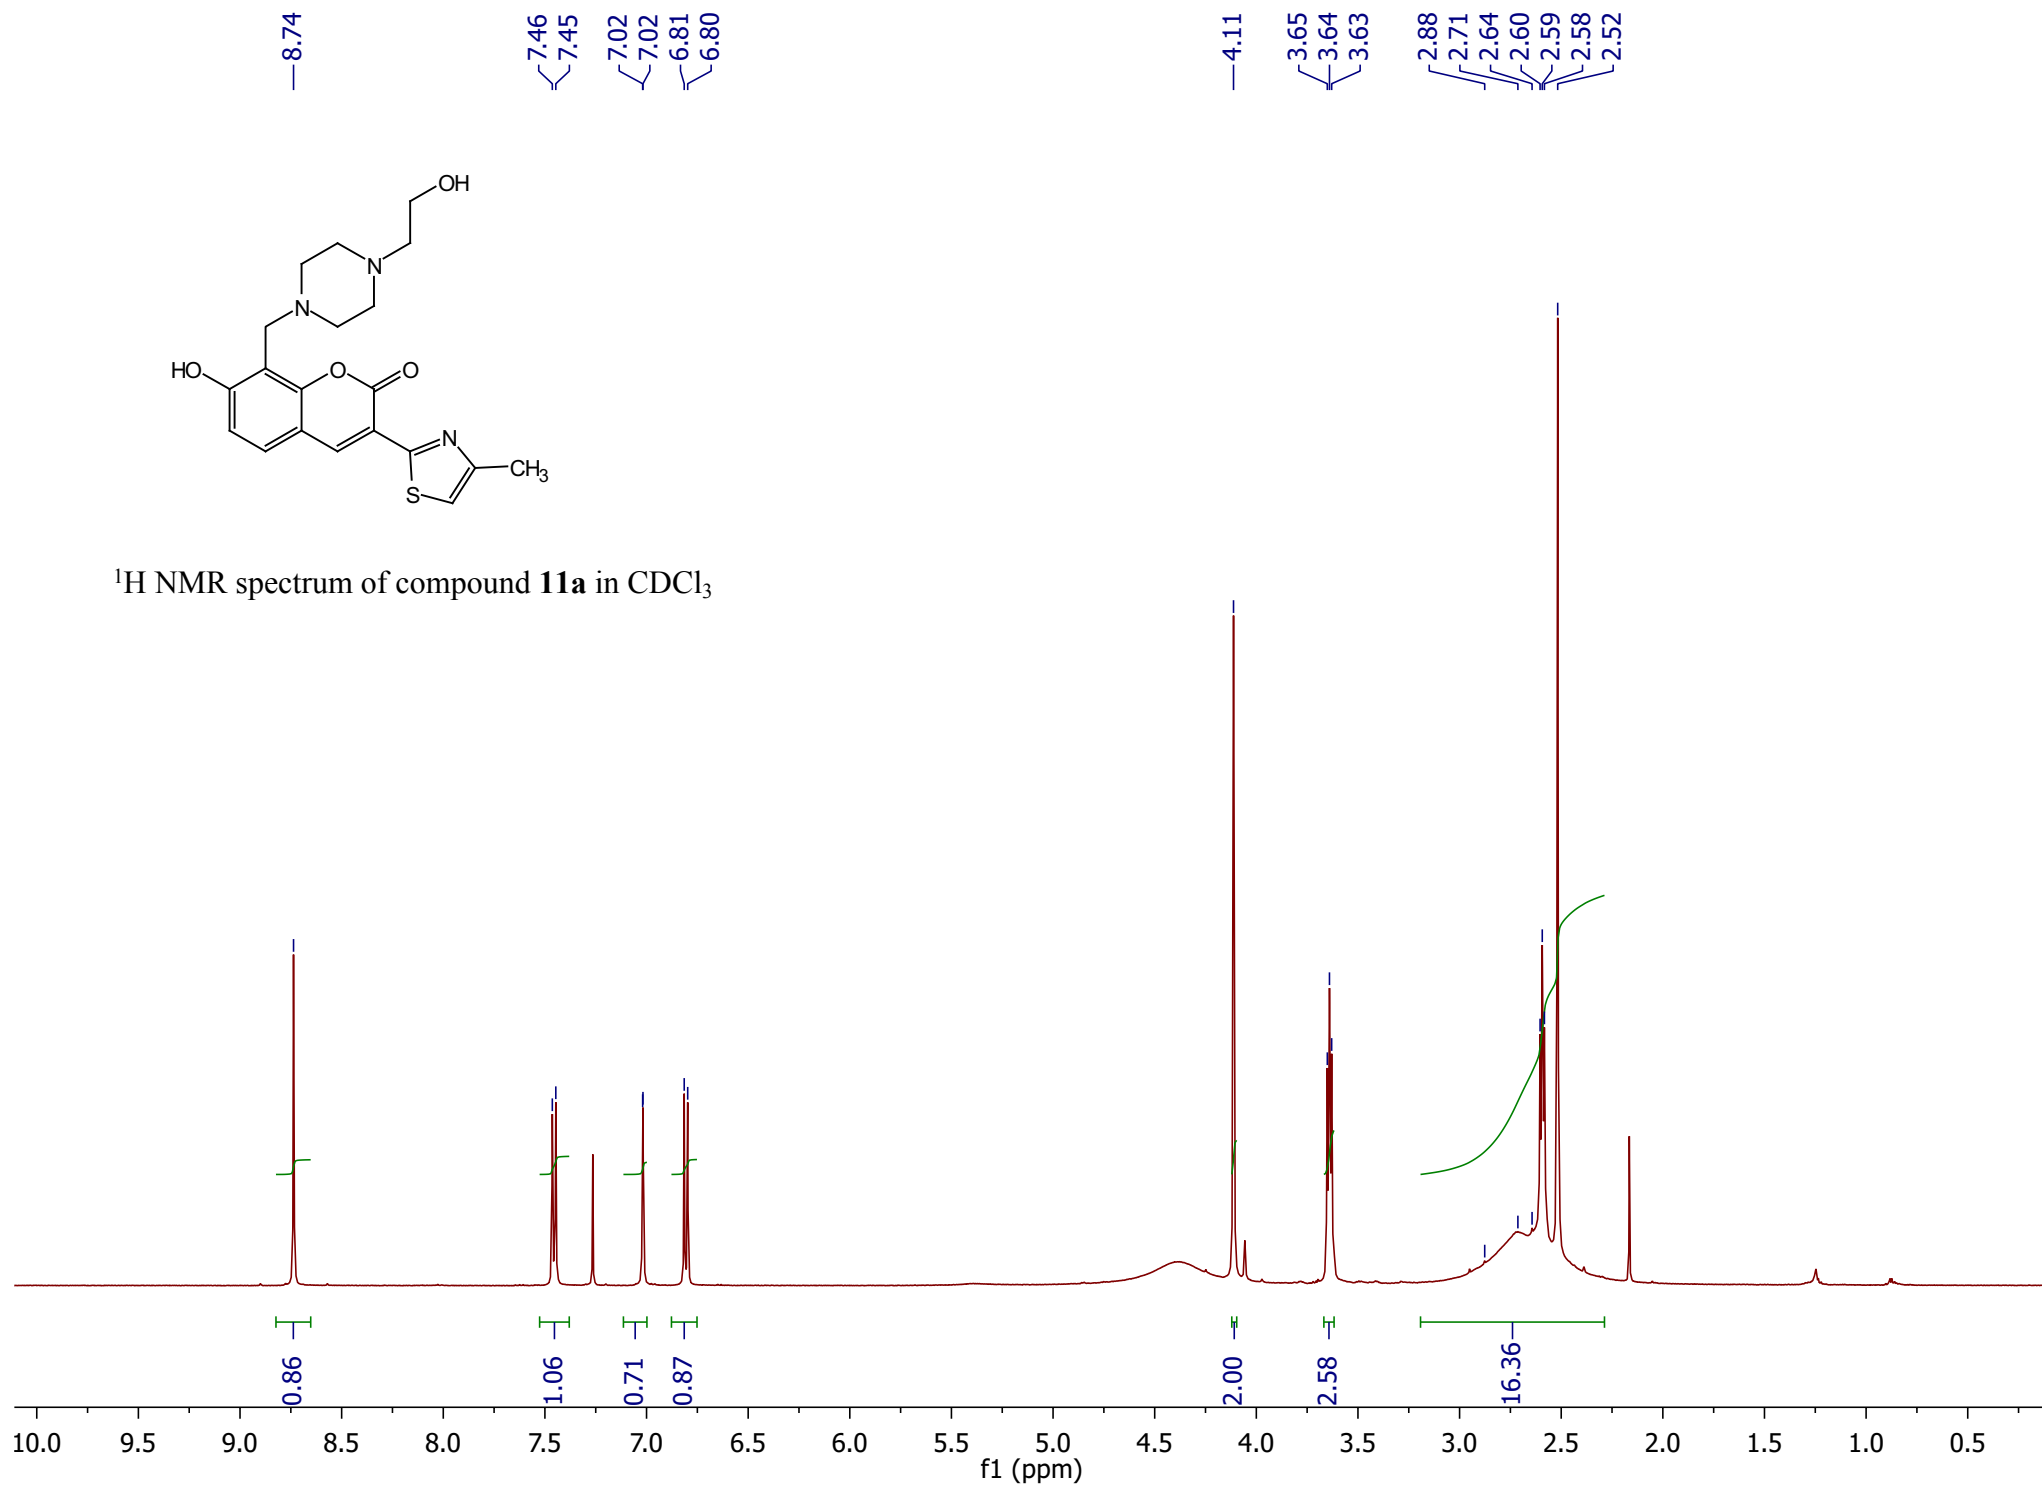



$^{13}\text{C}$  NMR spectrum of compound **11a** in  $\text{CDCl}_3$

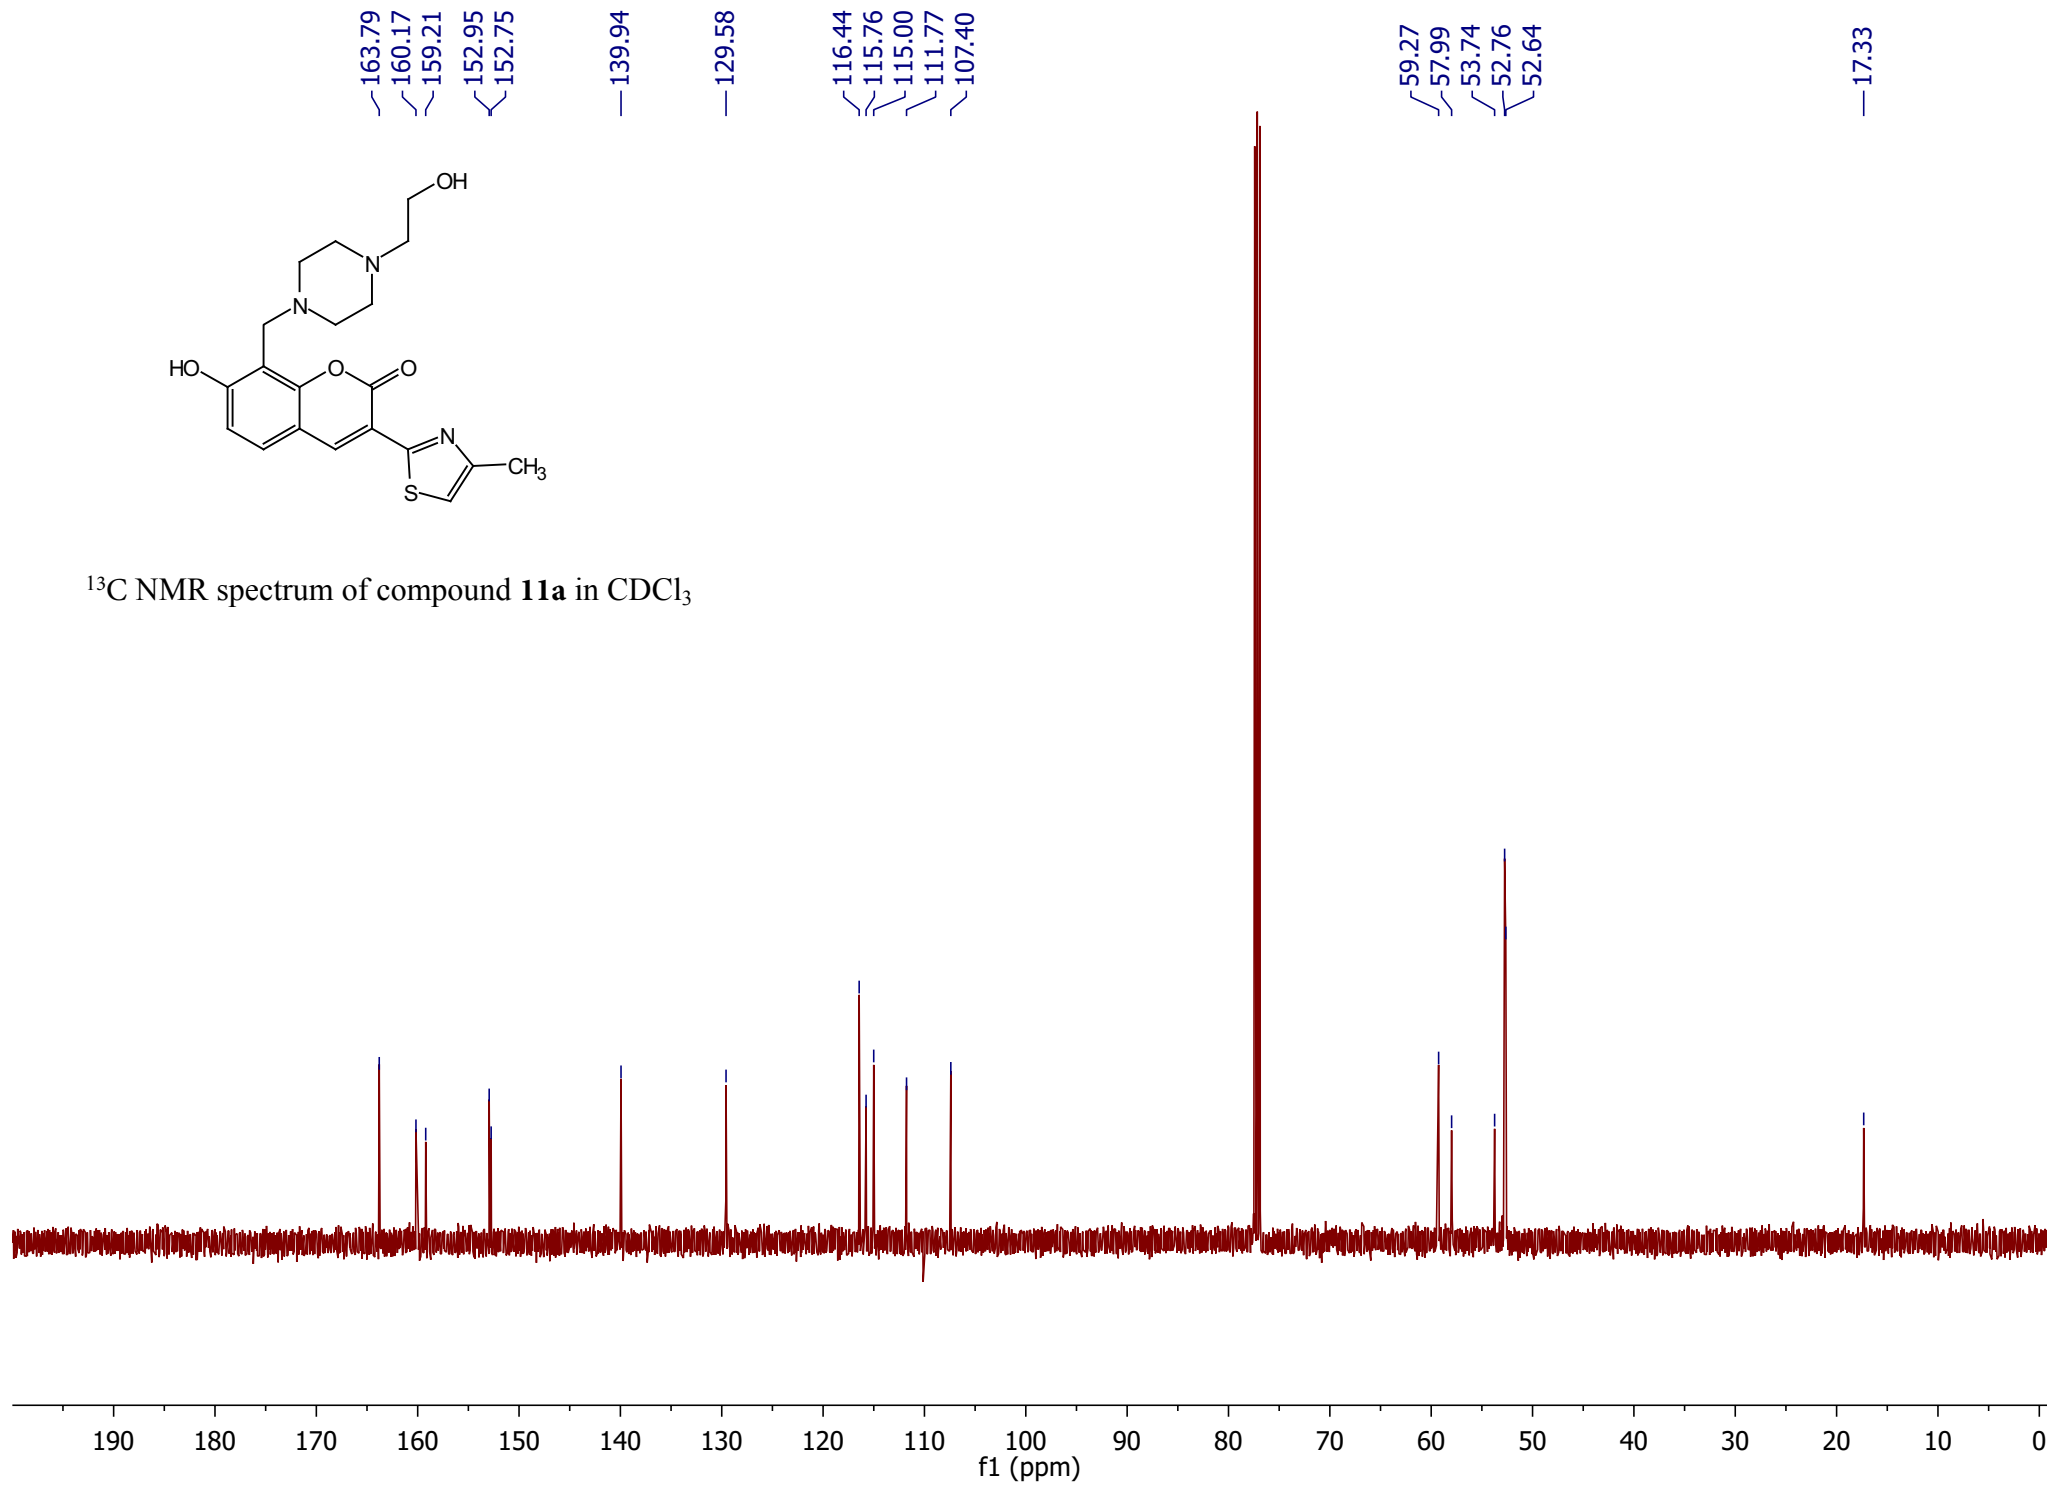

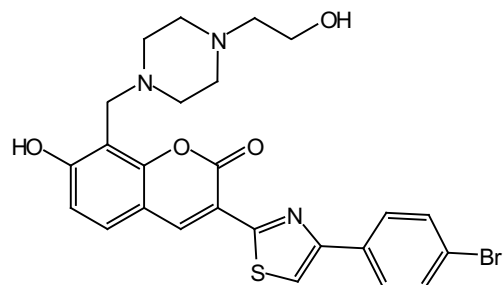

$^1\text{H}$  NMR spectrum of compound **11b** in  $\text{CDCl}_3$

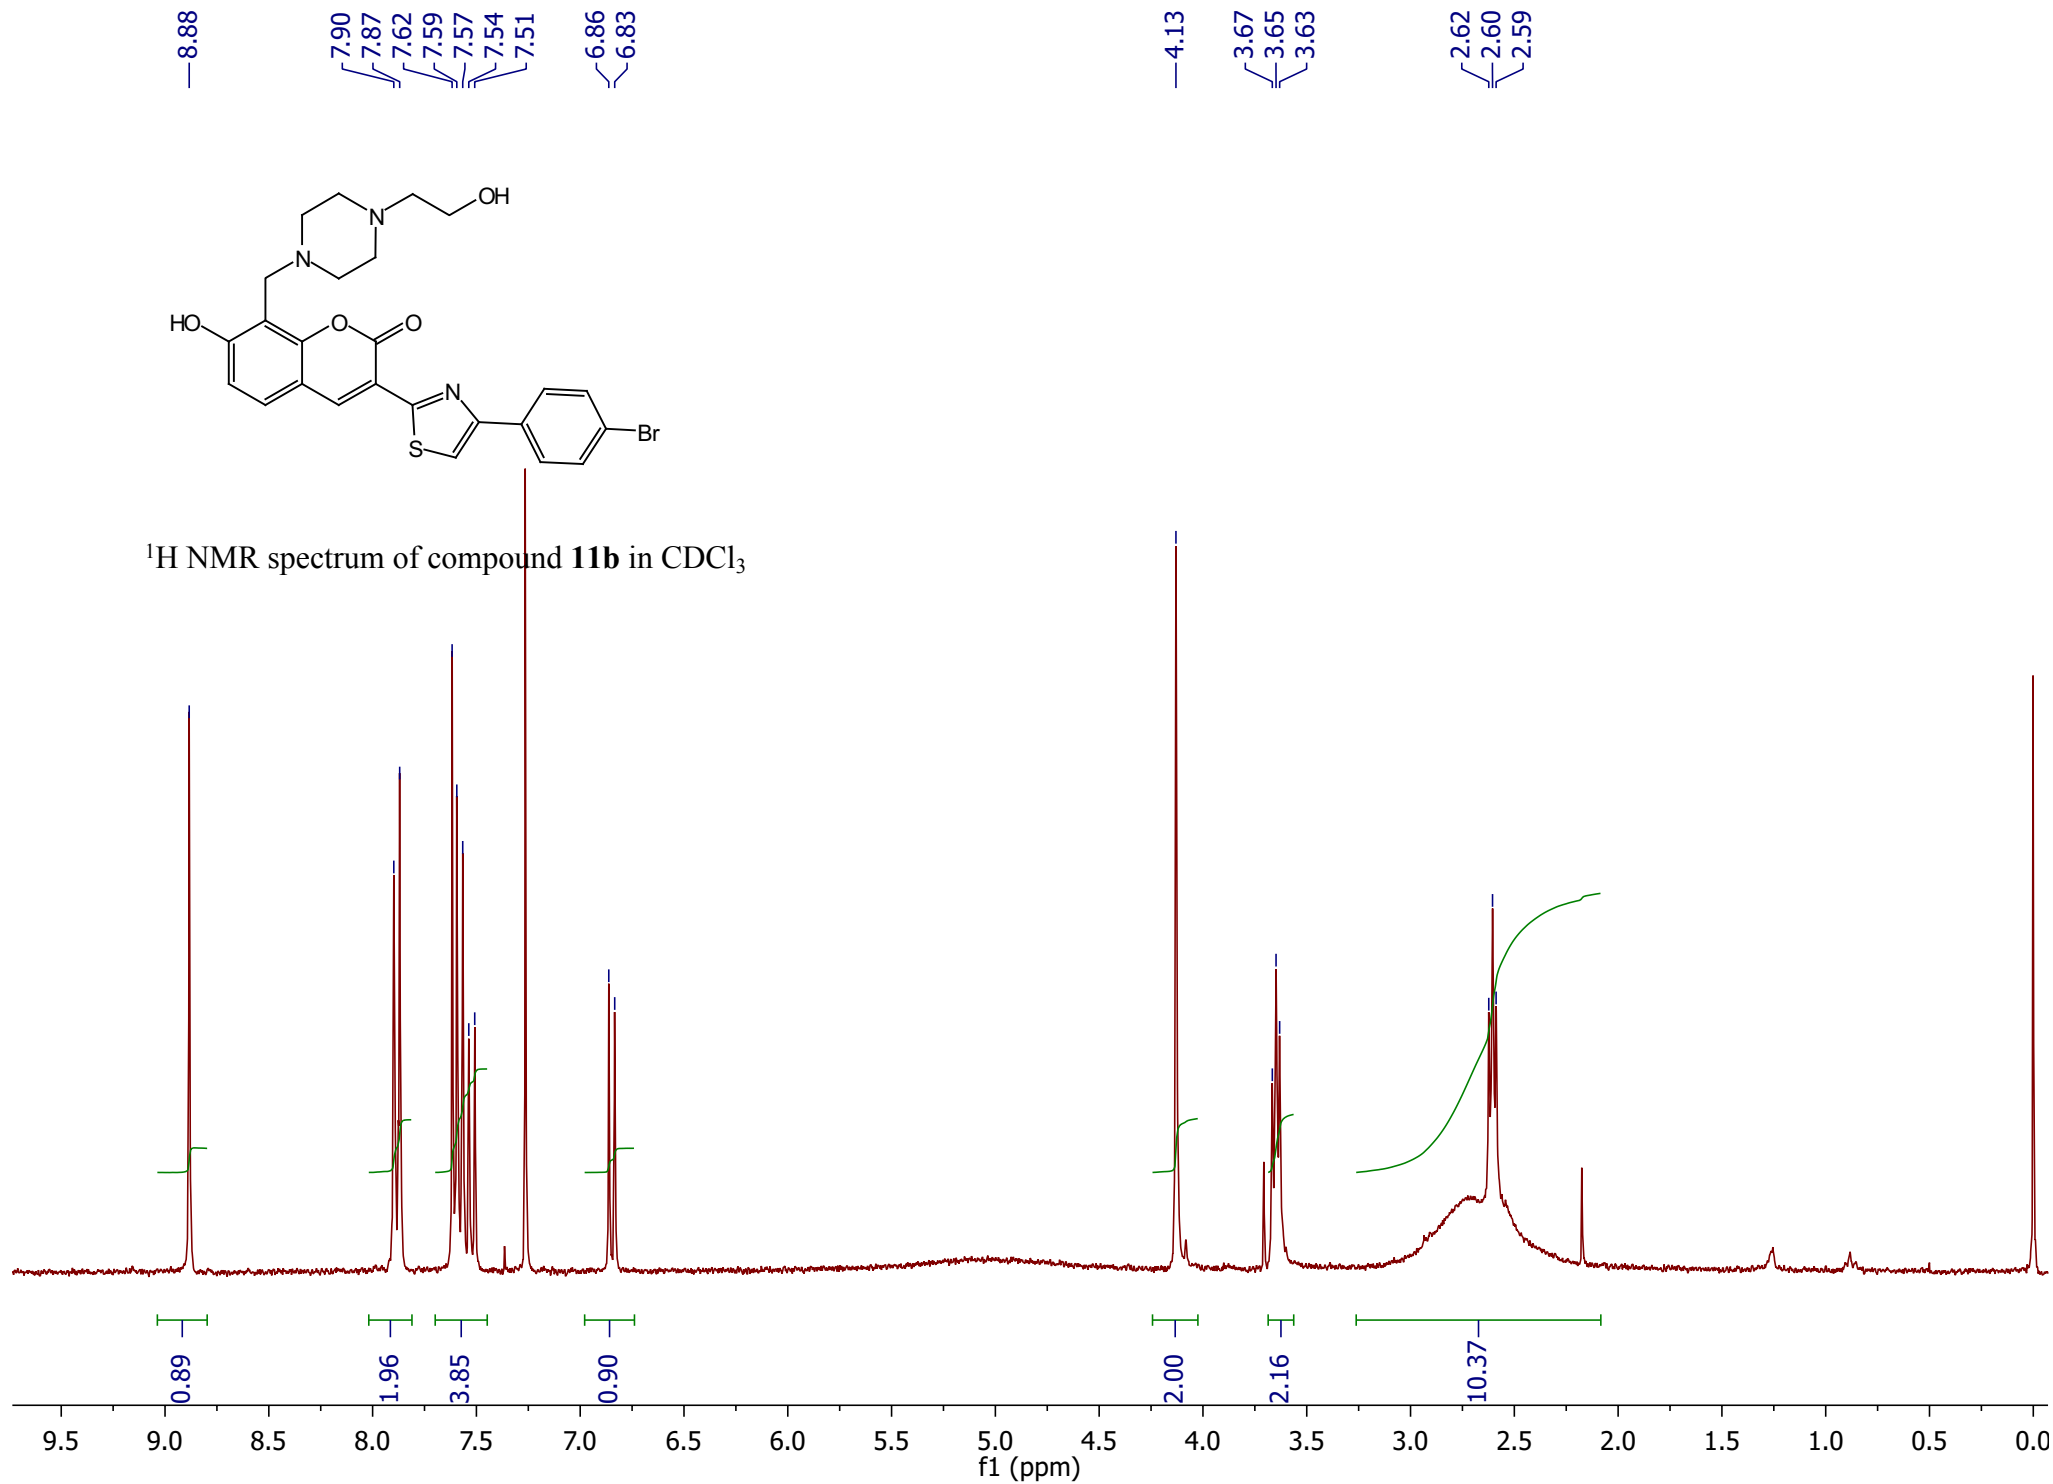

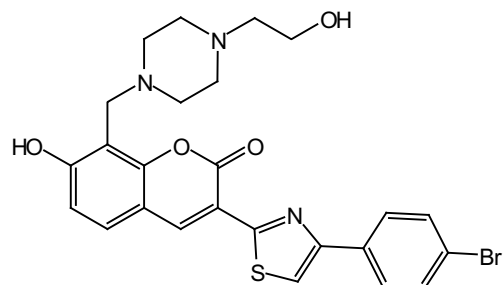

$^{13}\text{C}$  NMR spectrum of compound **11b** in  $\text{CDCl}_3$

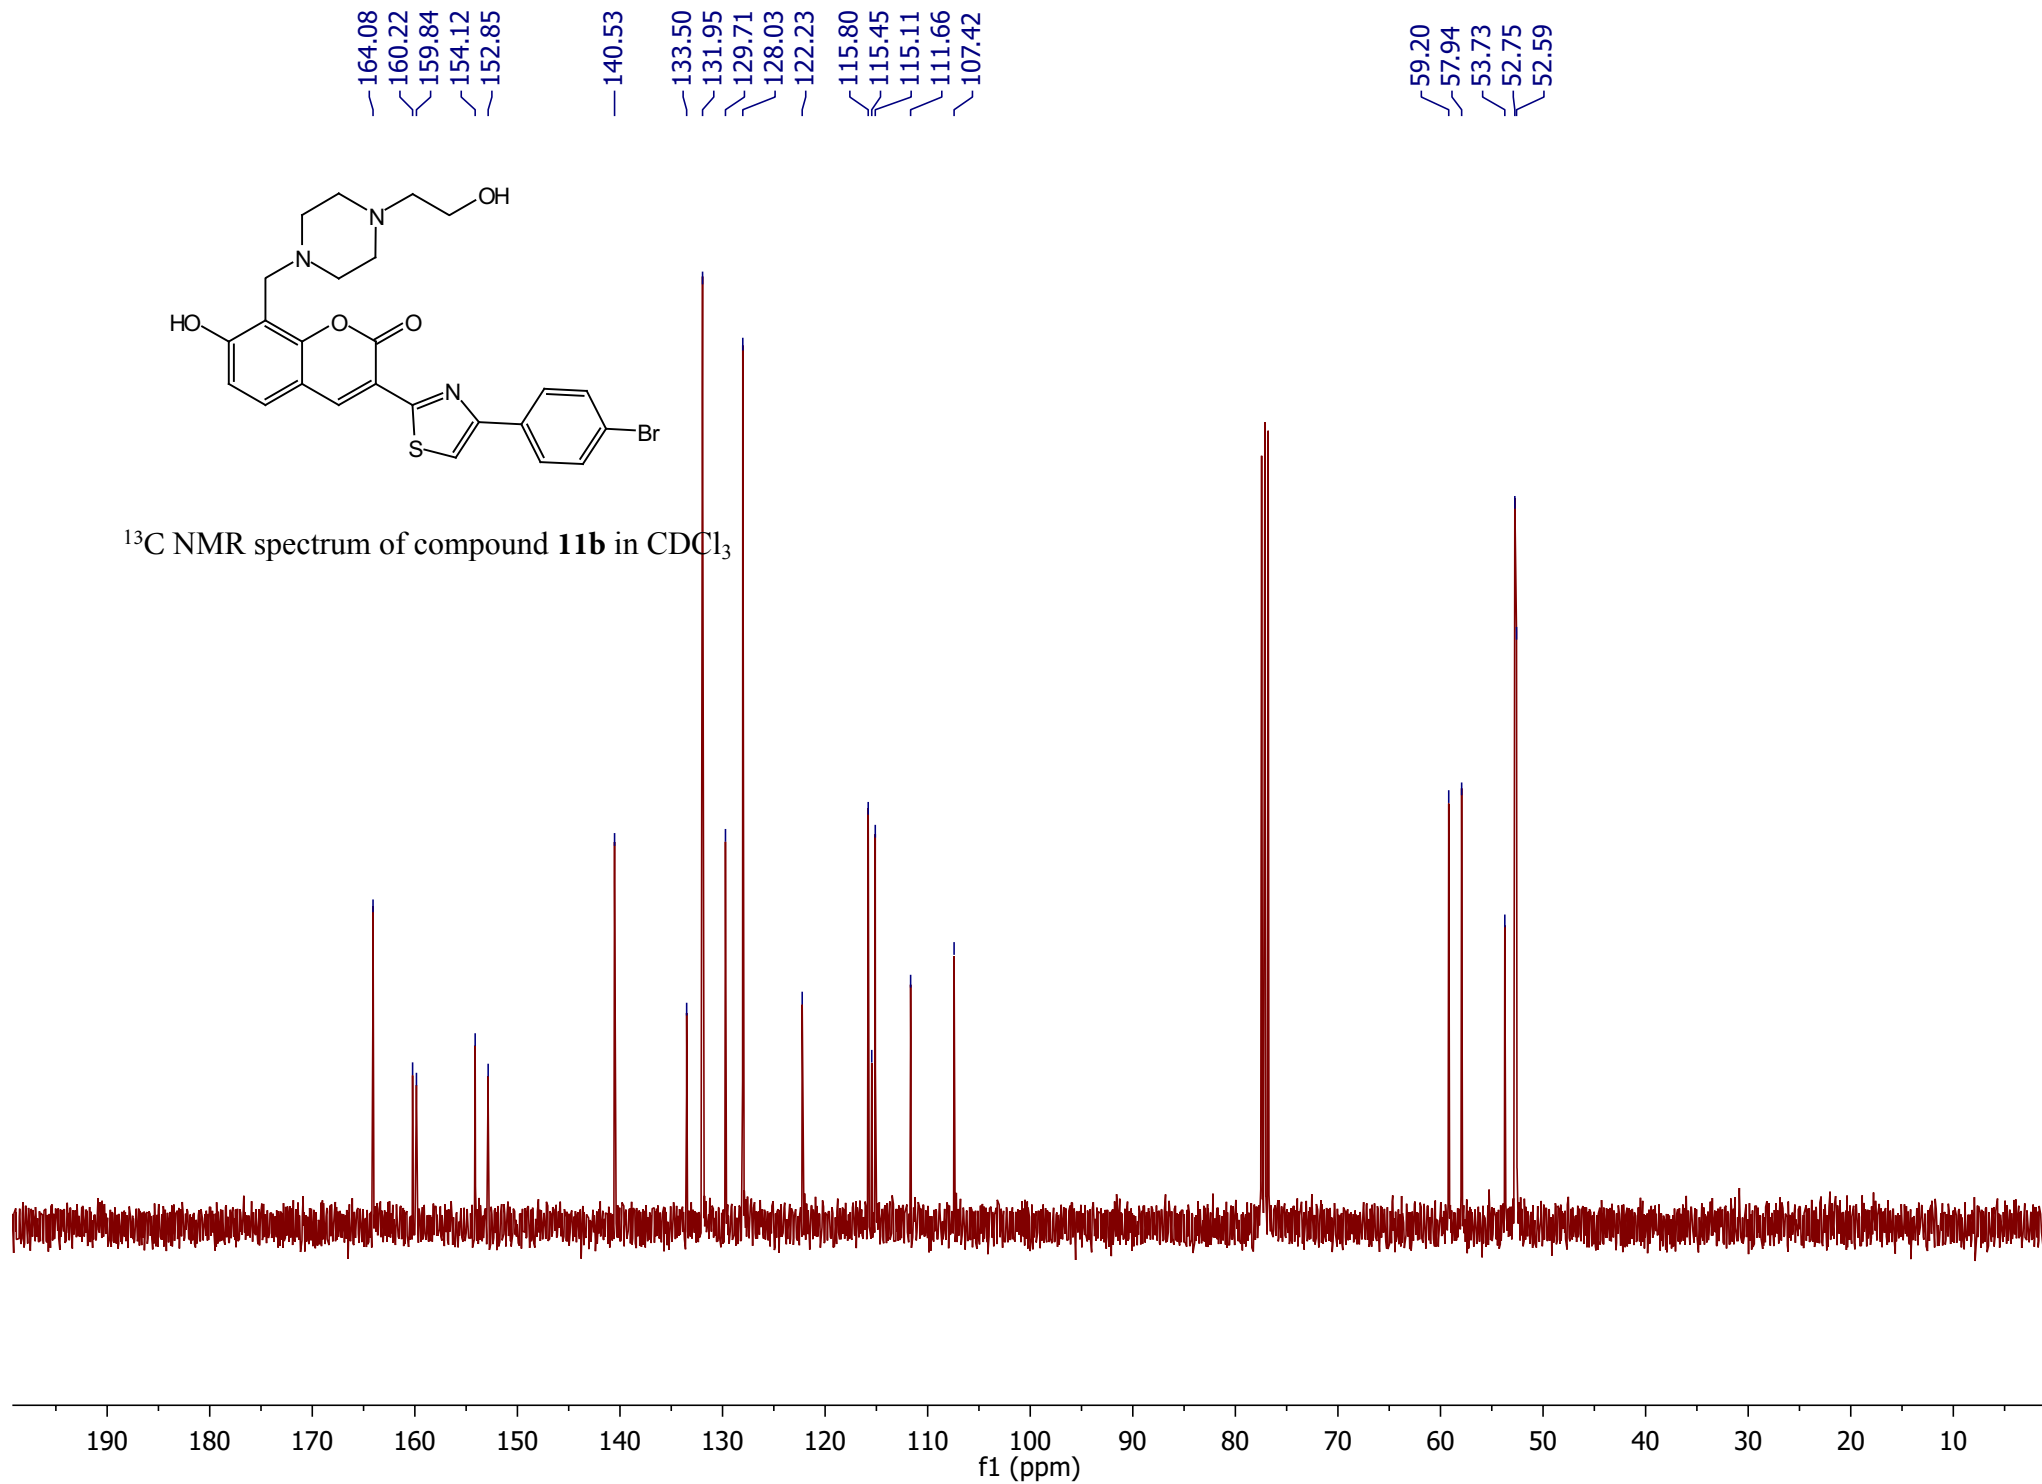

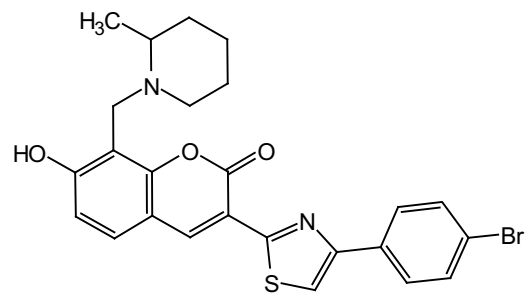

$^1\text{H}$  NMR spectrum of compound **11c** in  $\text{CDCl}_3$

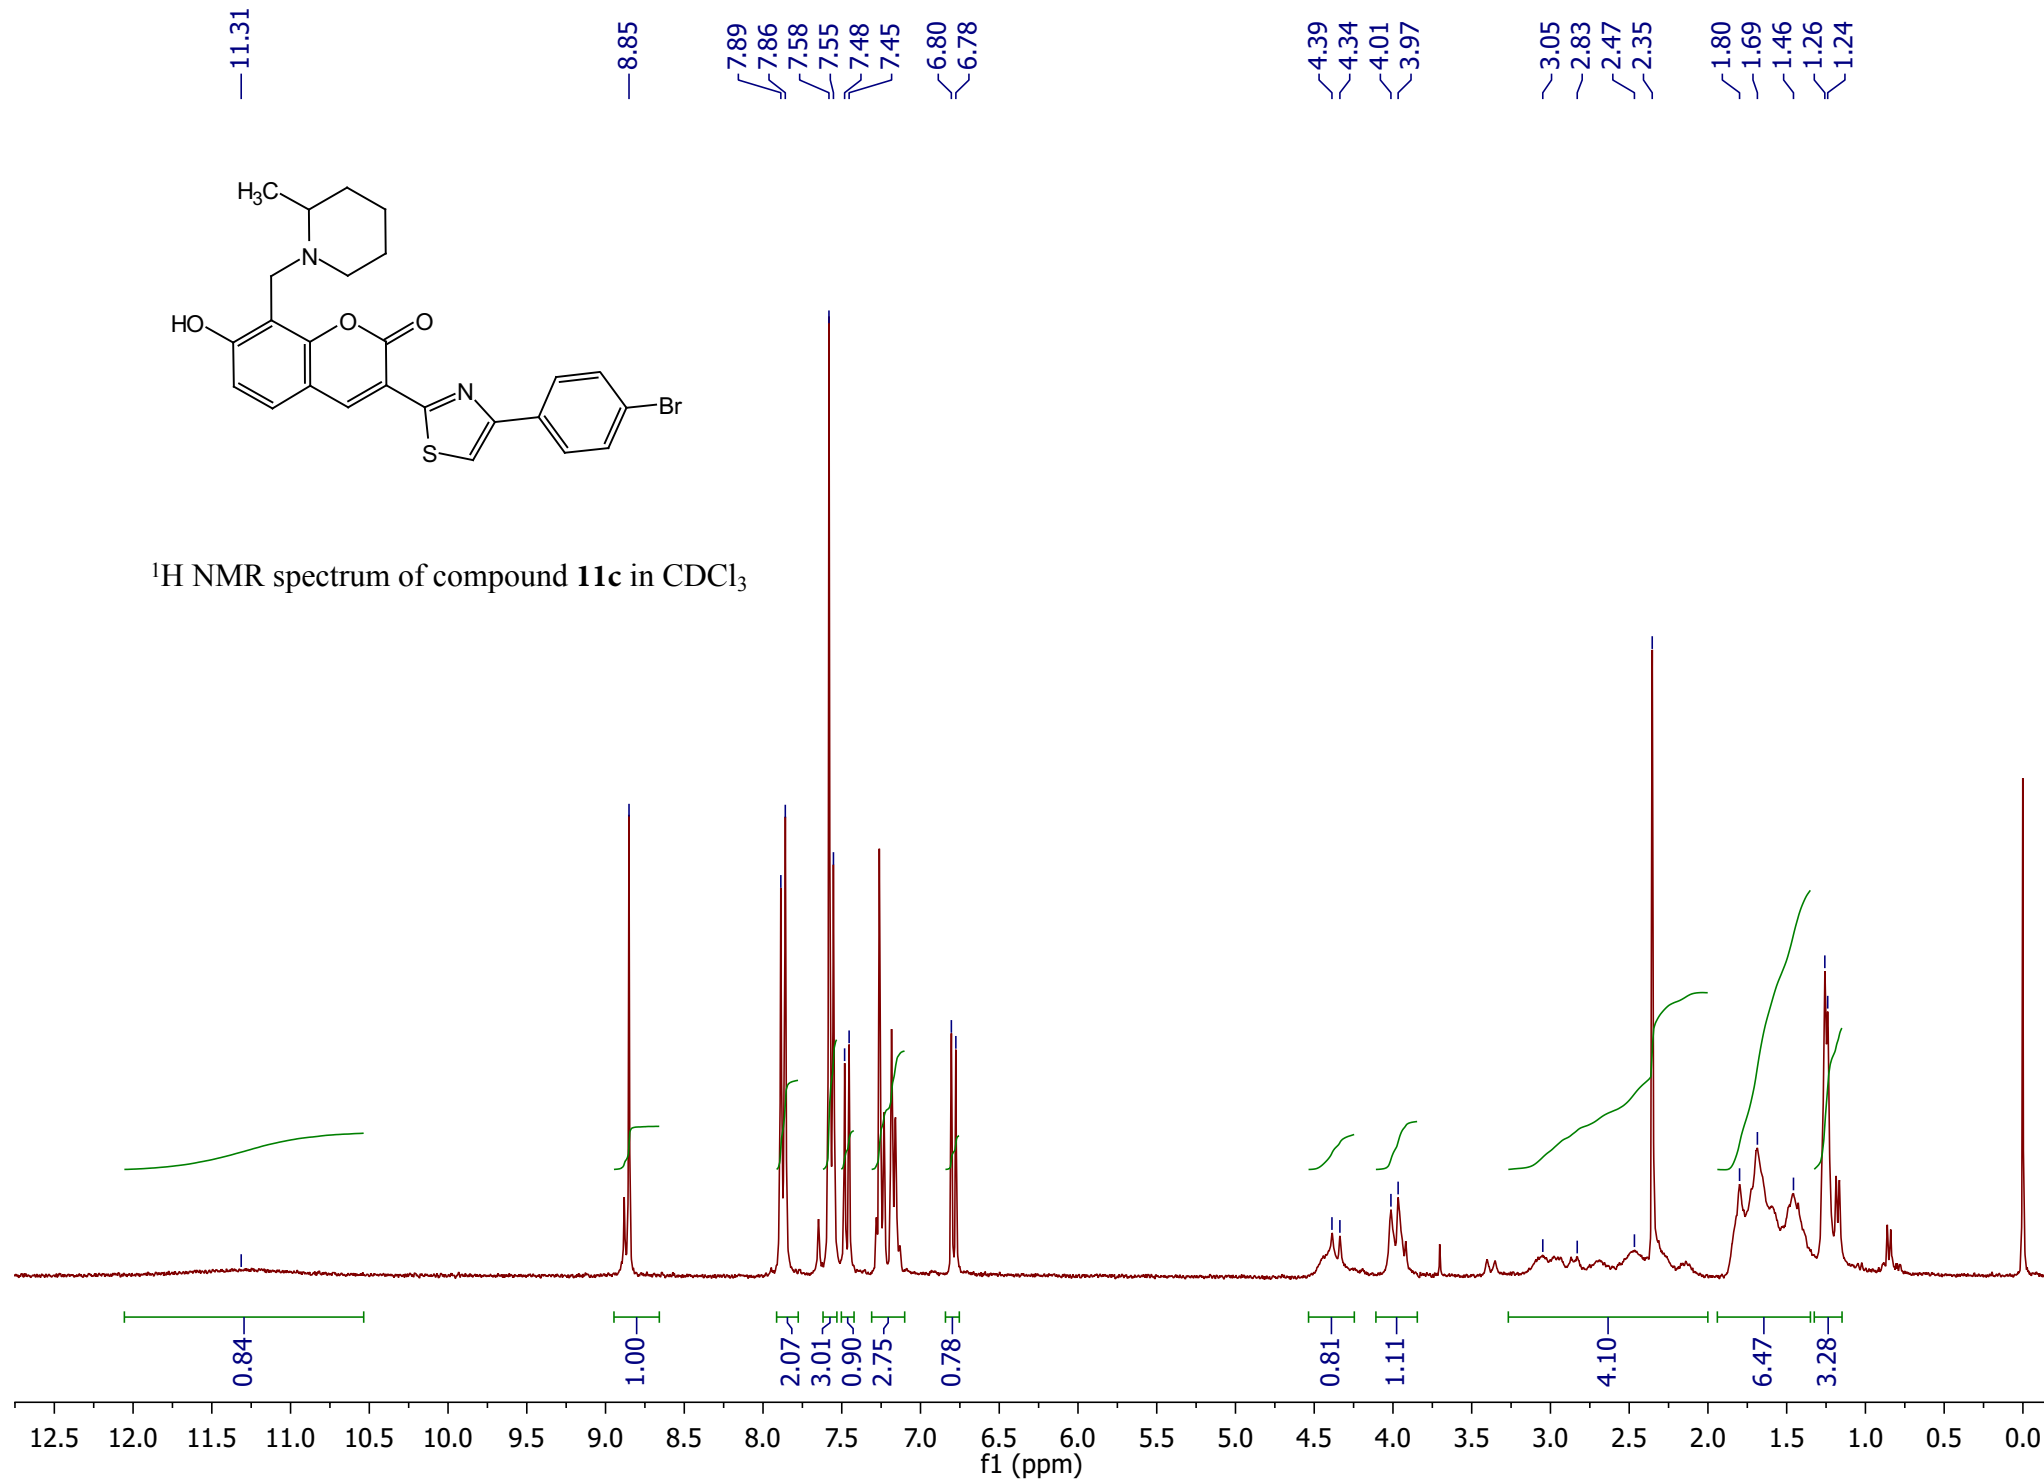

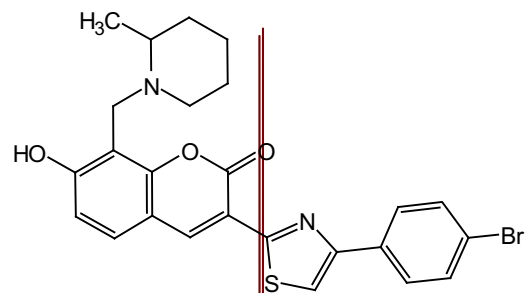

$^{13}\text{C}$  NMR spectrum of compound **11c** in  $\text{CDCl}_3 + \text{CF}_3\text{COOH}$

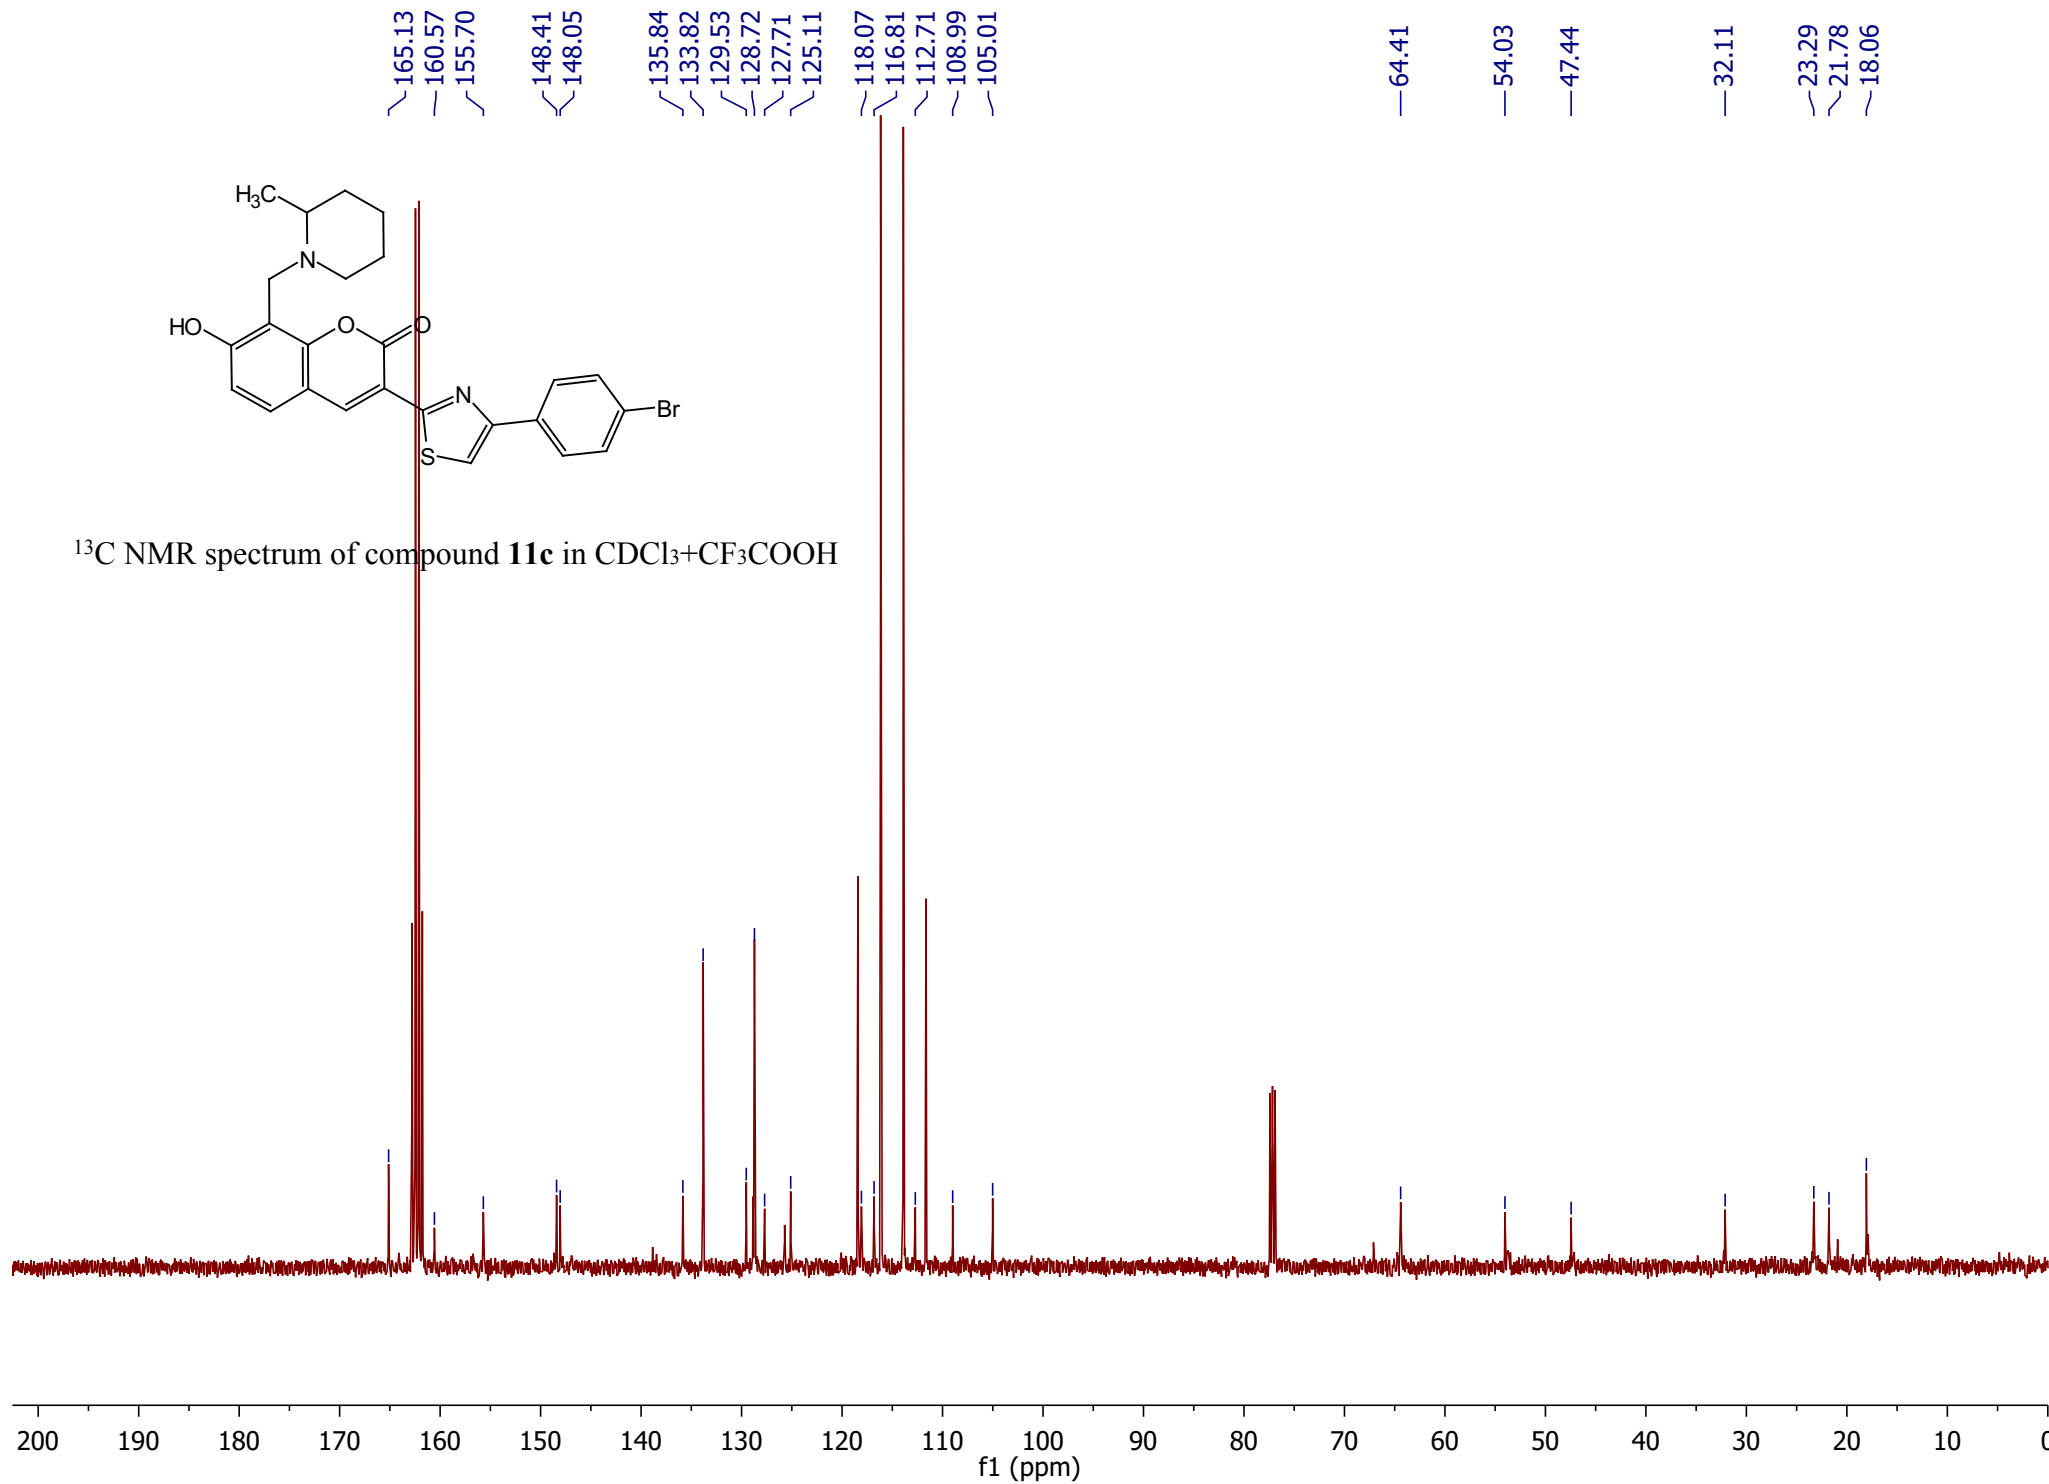

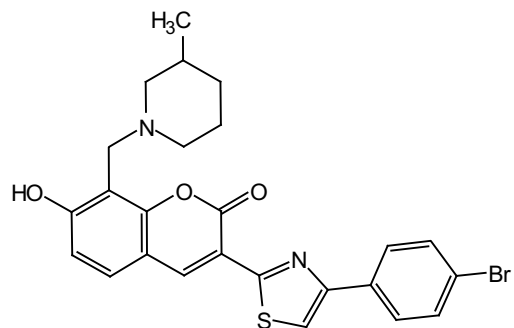

$^1\text{H}$  NMR spectrum of compound **11d** in  $\text{CDCl}_3$

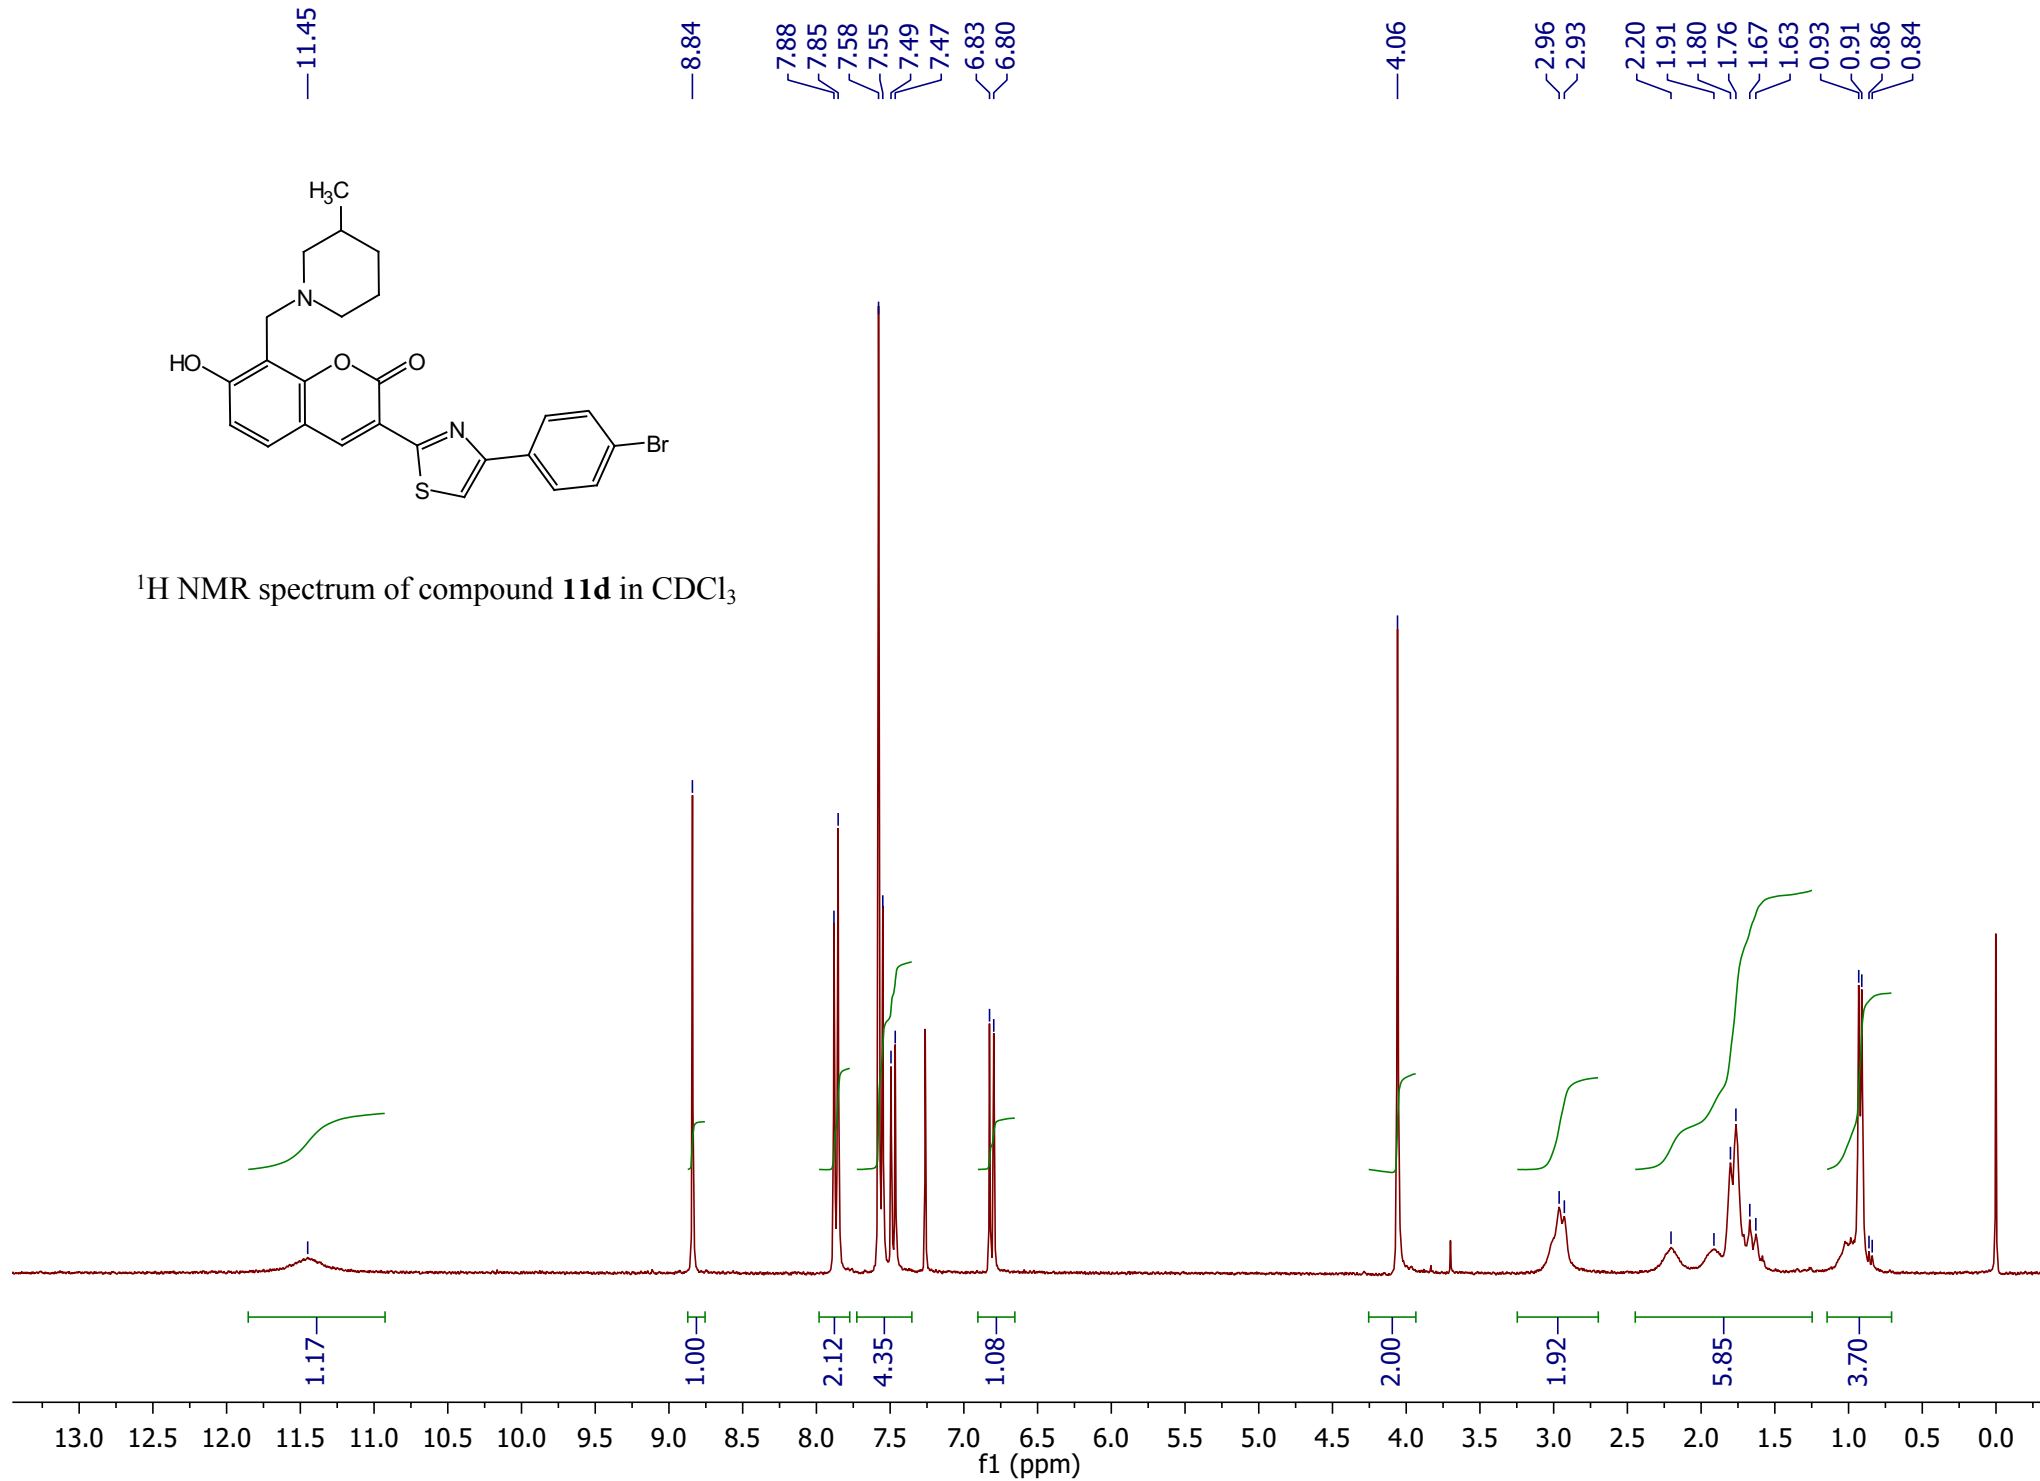



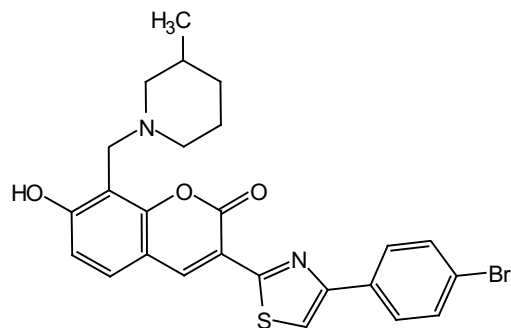

$^{13}\text{C}$  NMR spectrum of compound **11d** in  $\text{DMSO-d}_6$

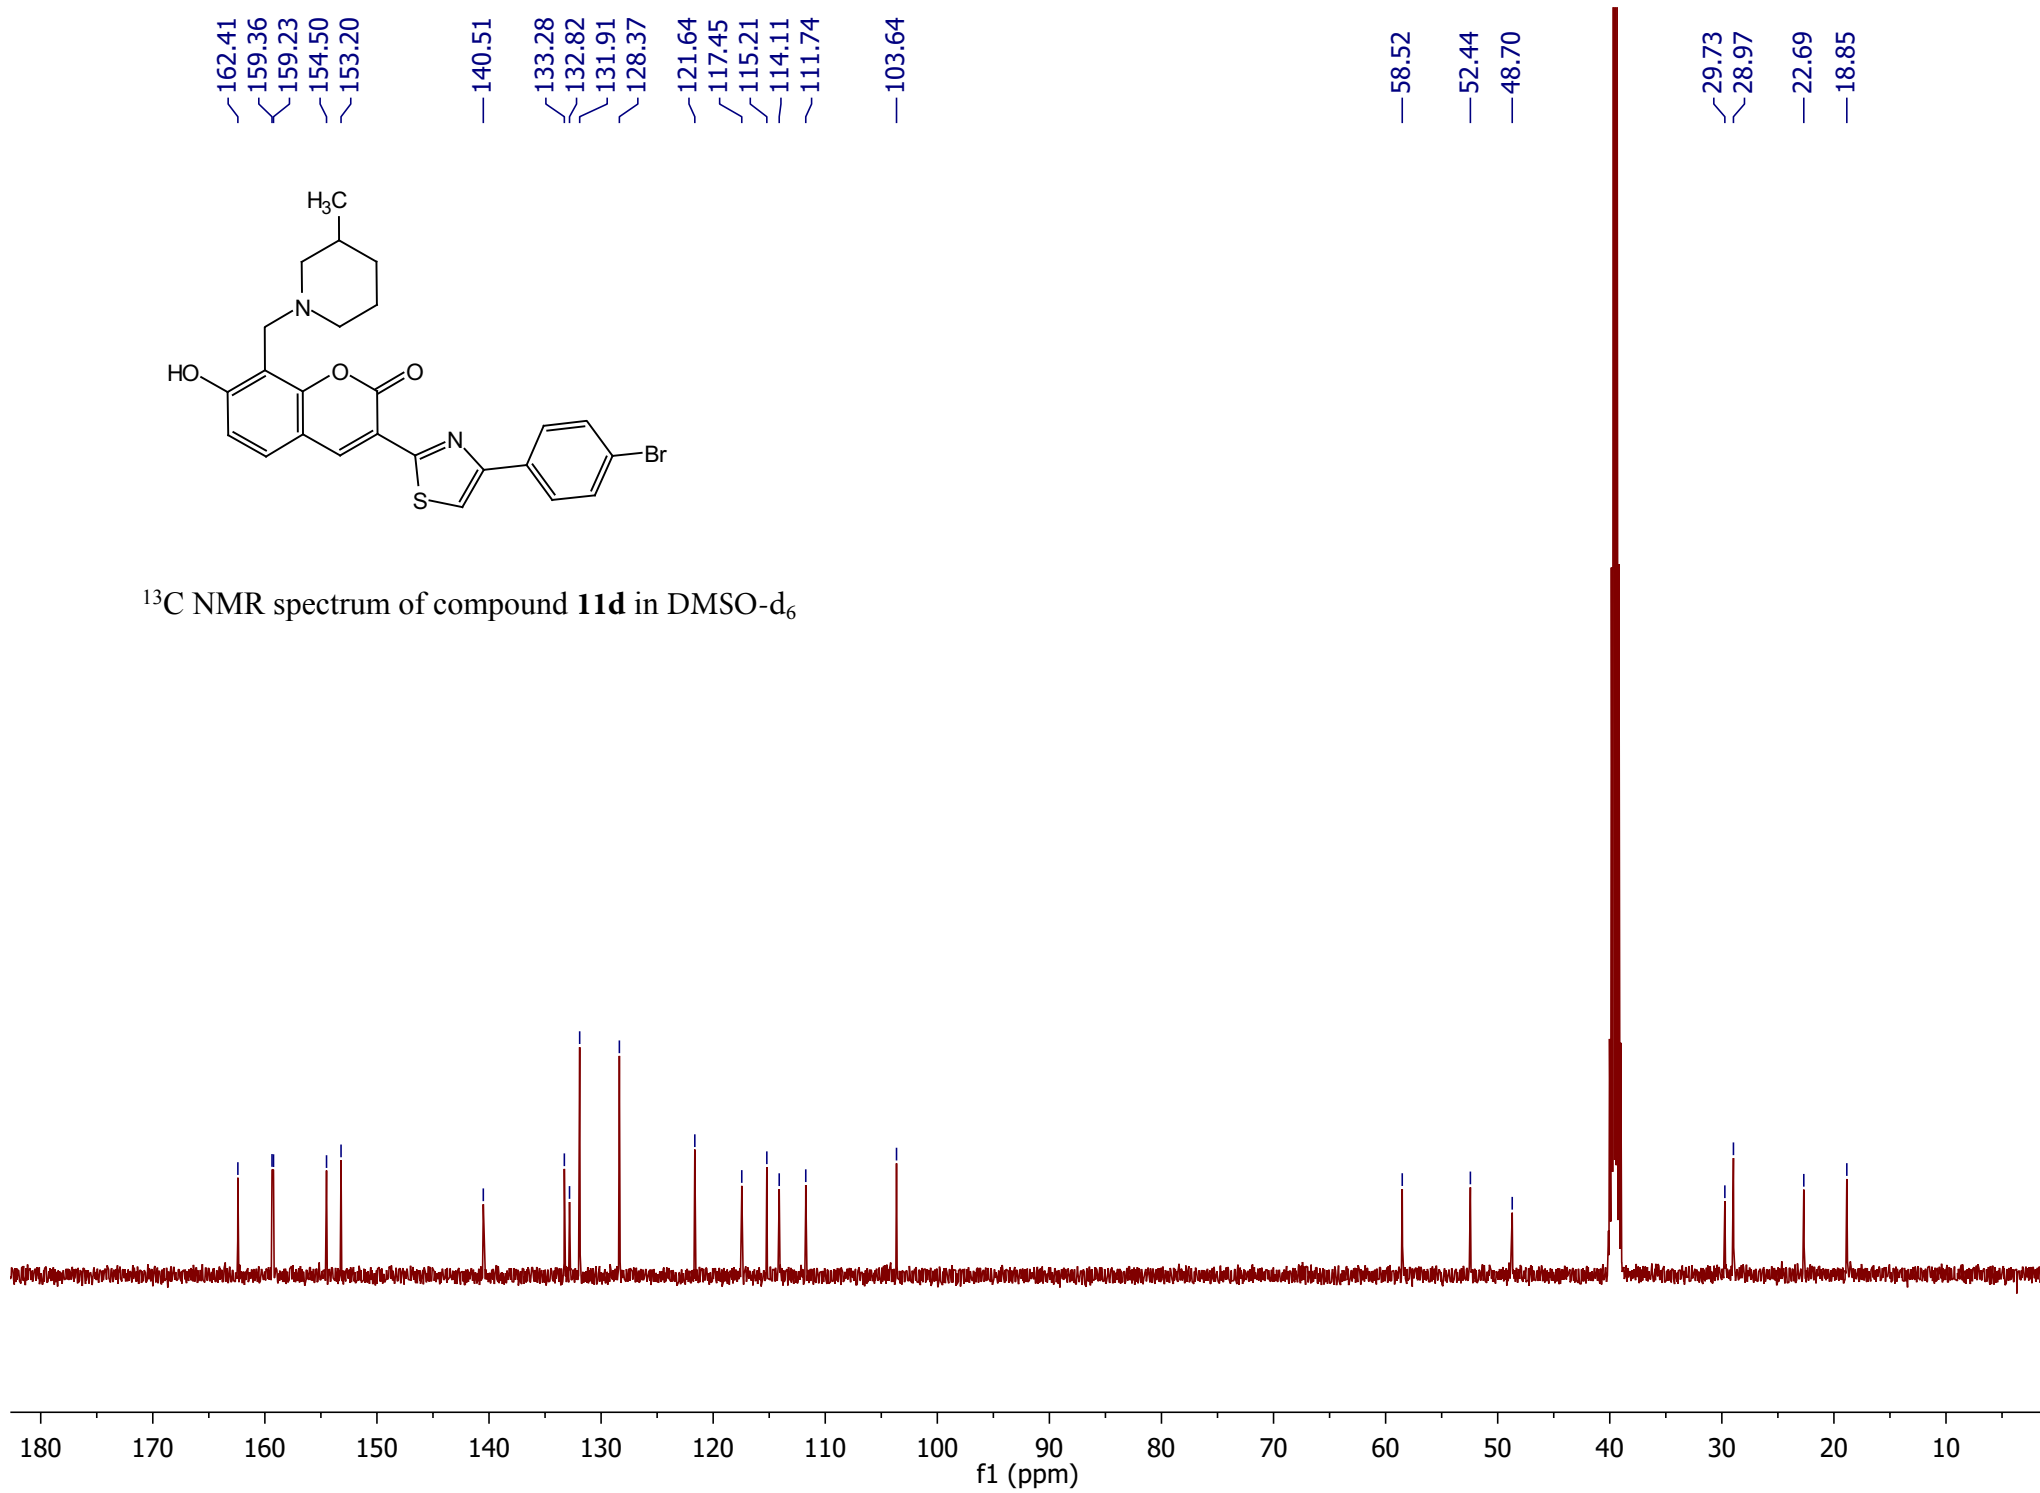

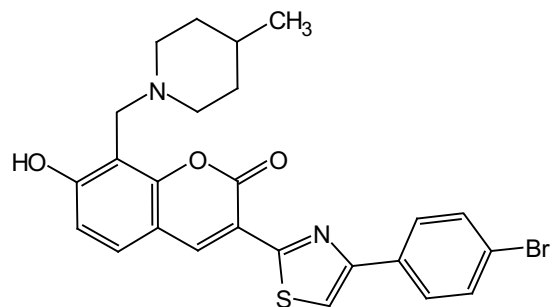

$^1\text{H}$  NMR spectrum of compound **11e** in  $\text{CDCl}_3$

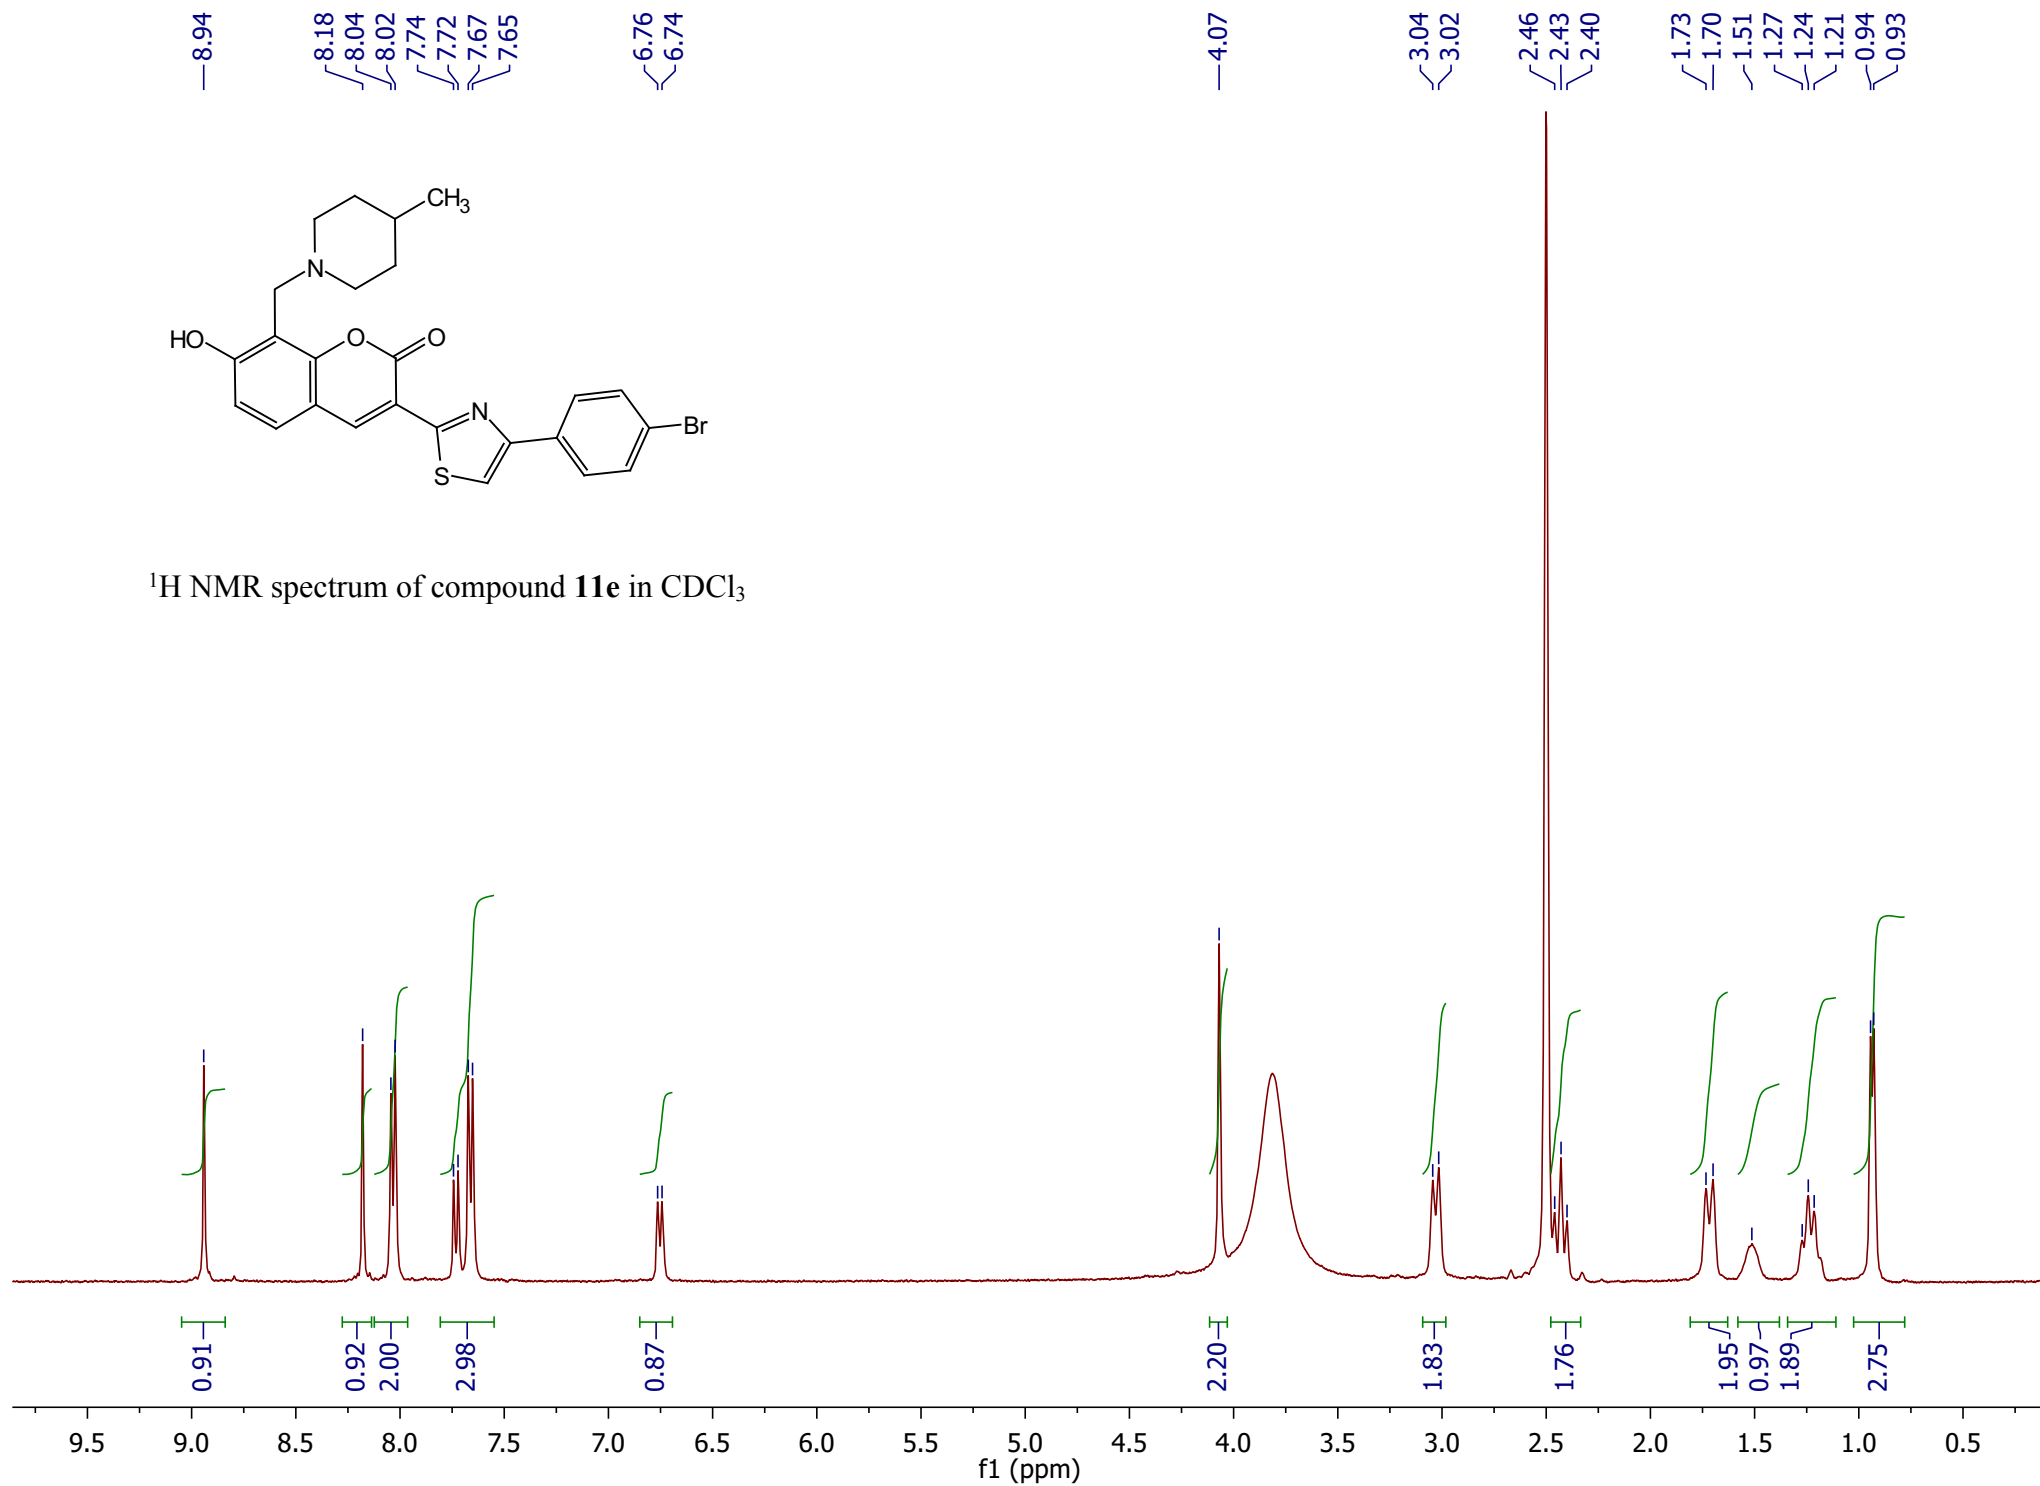

165.34  
164.93  
160.58  
155.65  
148.35  
148.05  
135.83  
133.77  
128.69  
127.69  
125.02  
117.98  
116.83  
112.52  
108.81  
104.49

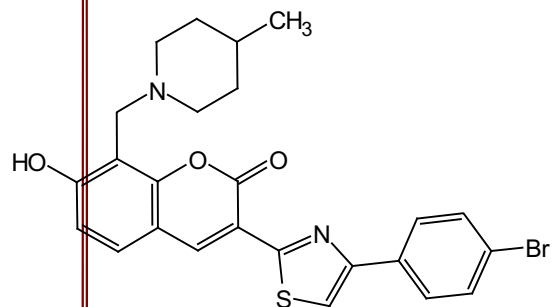

$^{13}\text{C}$  NMR spectrum of compound **11e** in  $\text{CDCl}_3 + \text{CF}_3\text{COOH}$

55.27  
50.27

31.63  
29.01

20.29

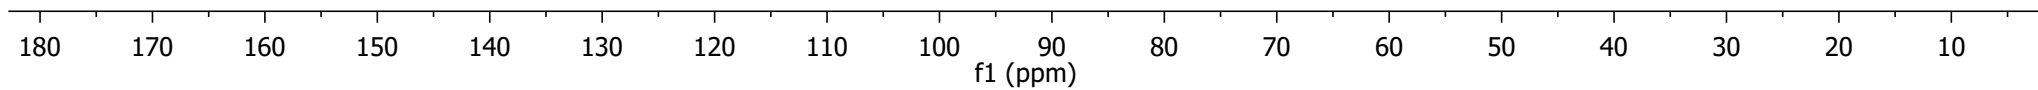

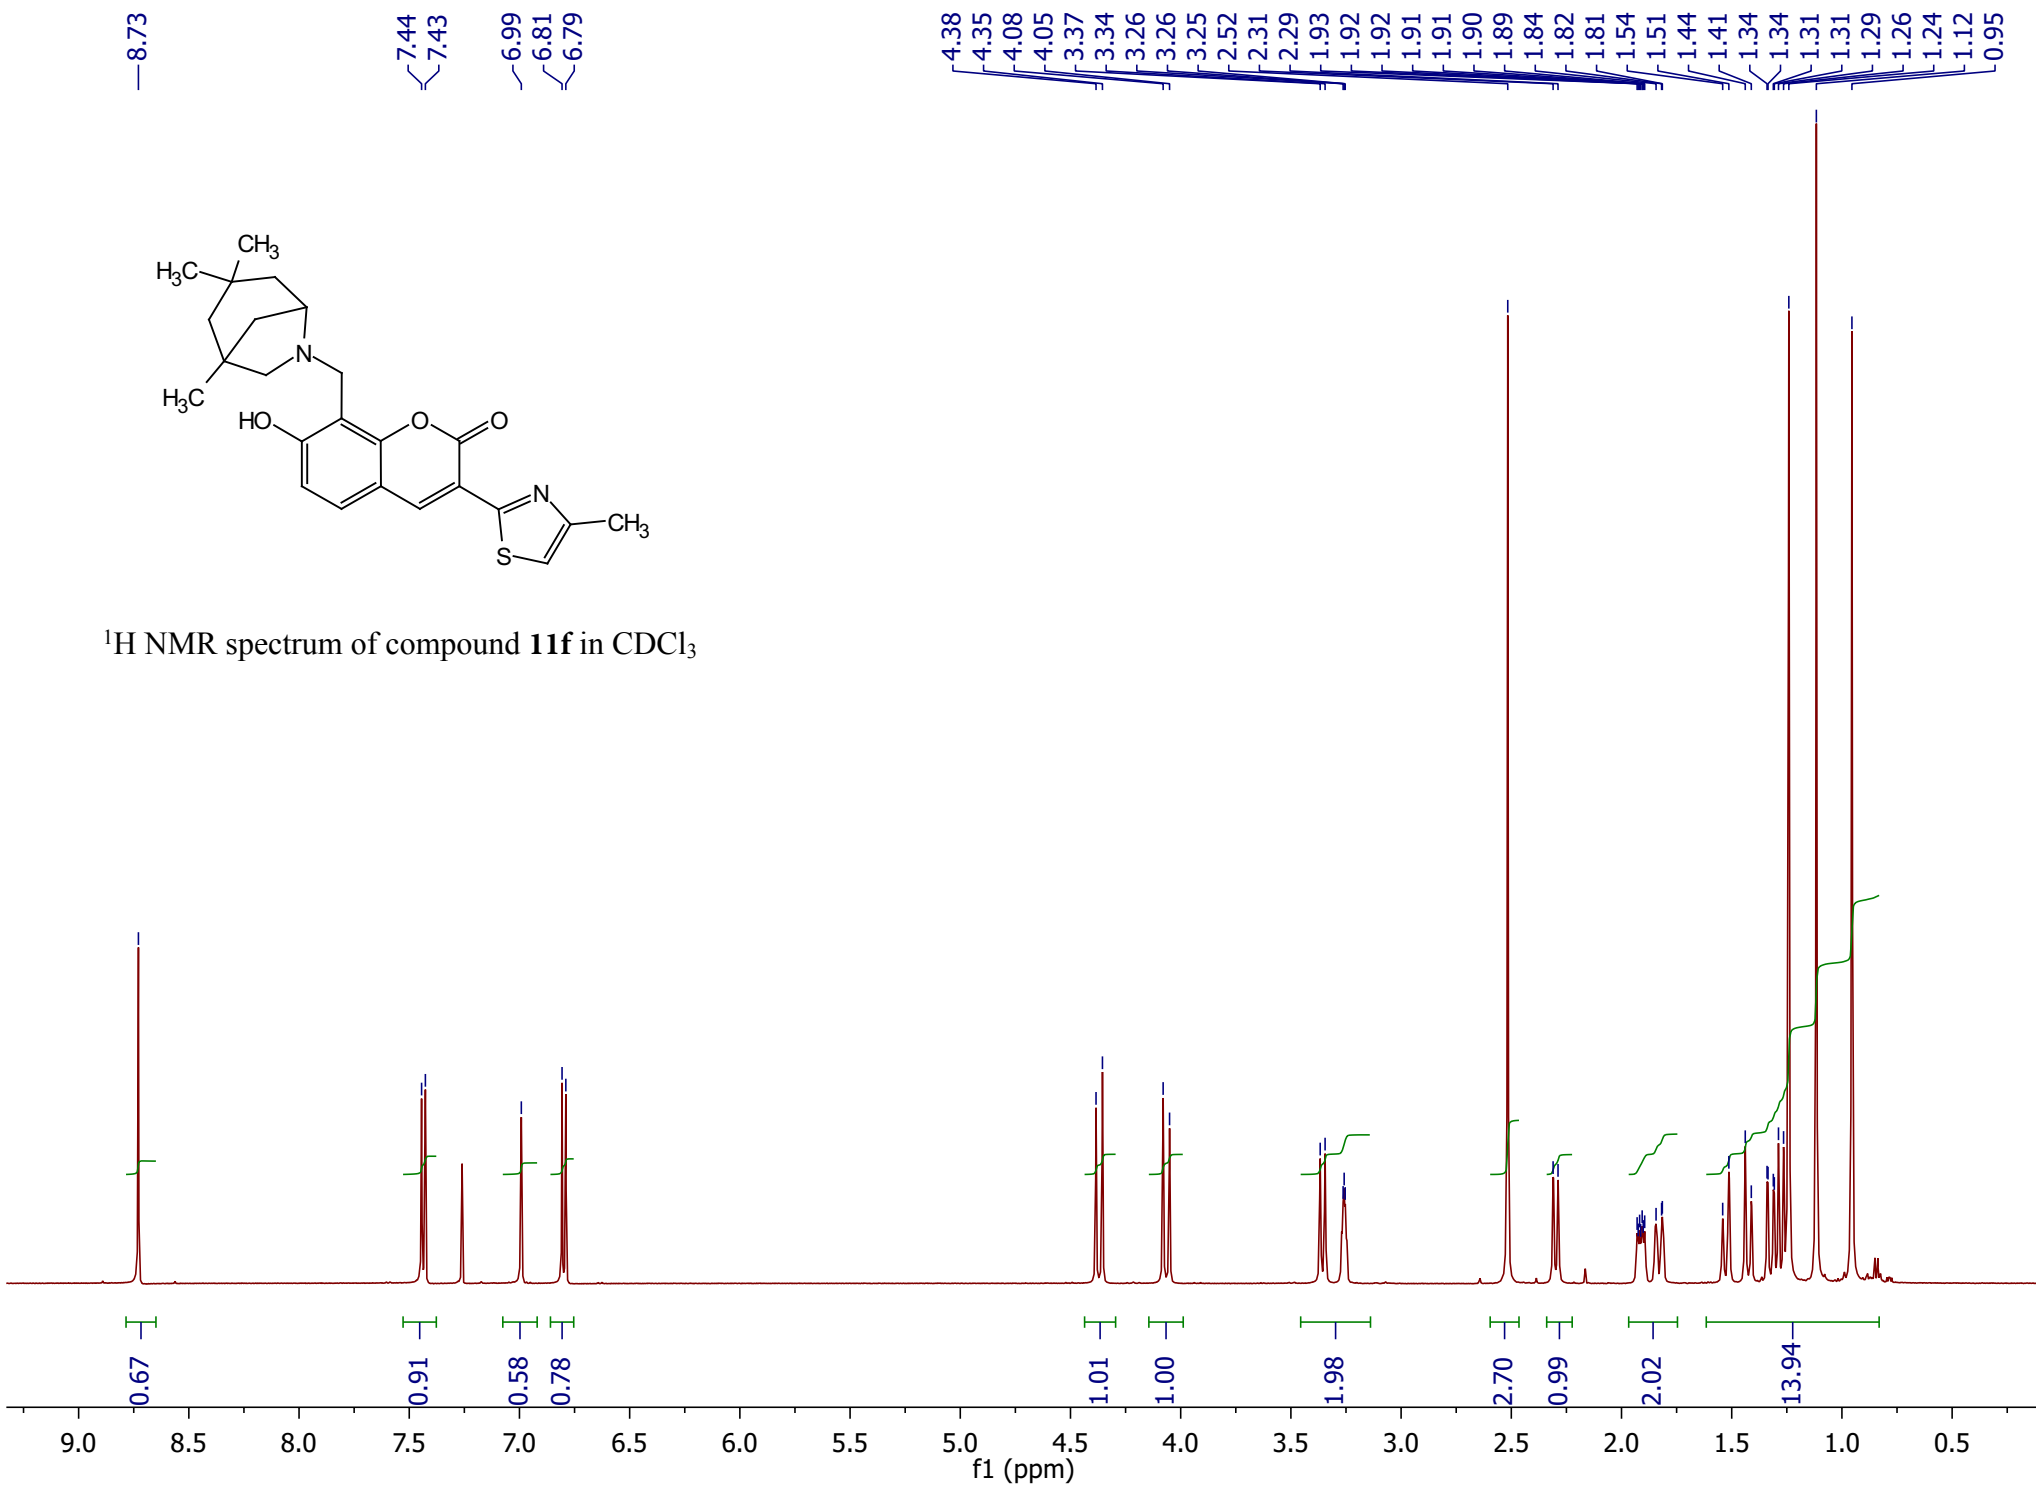

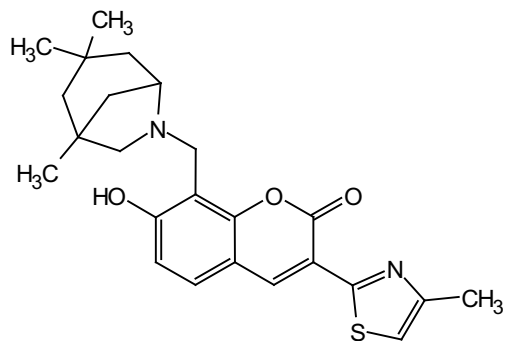

$^{13}\text{C}$  NMR spectrum of compound **11f** in  $\text{CDCl}_3$

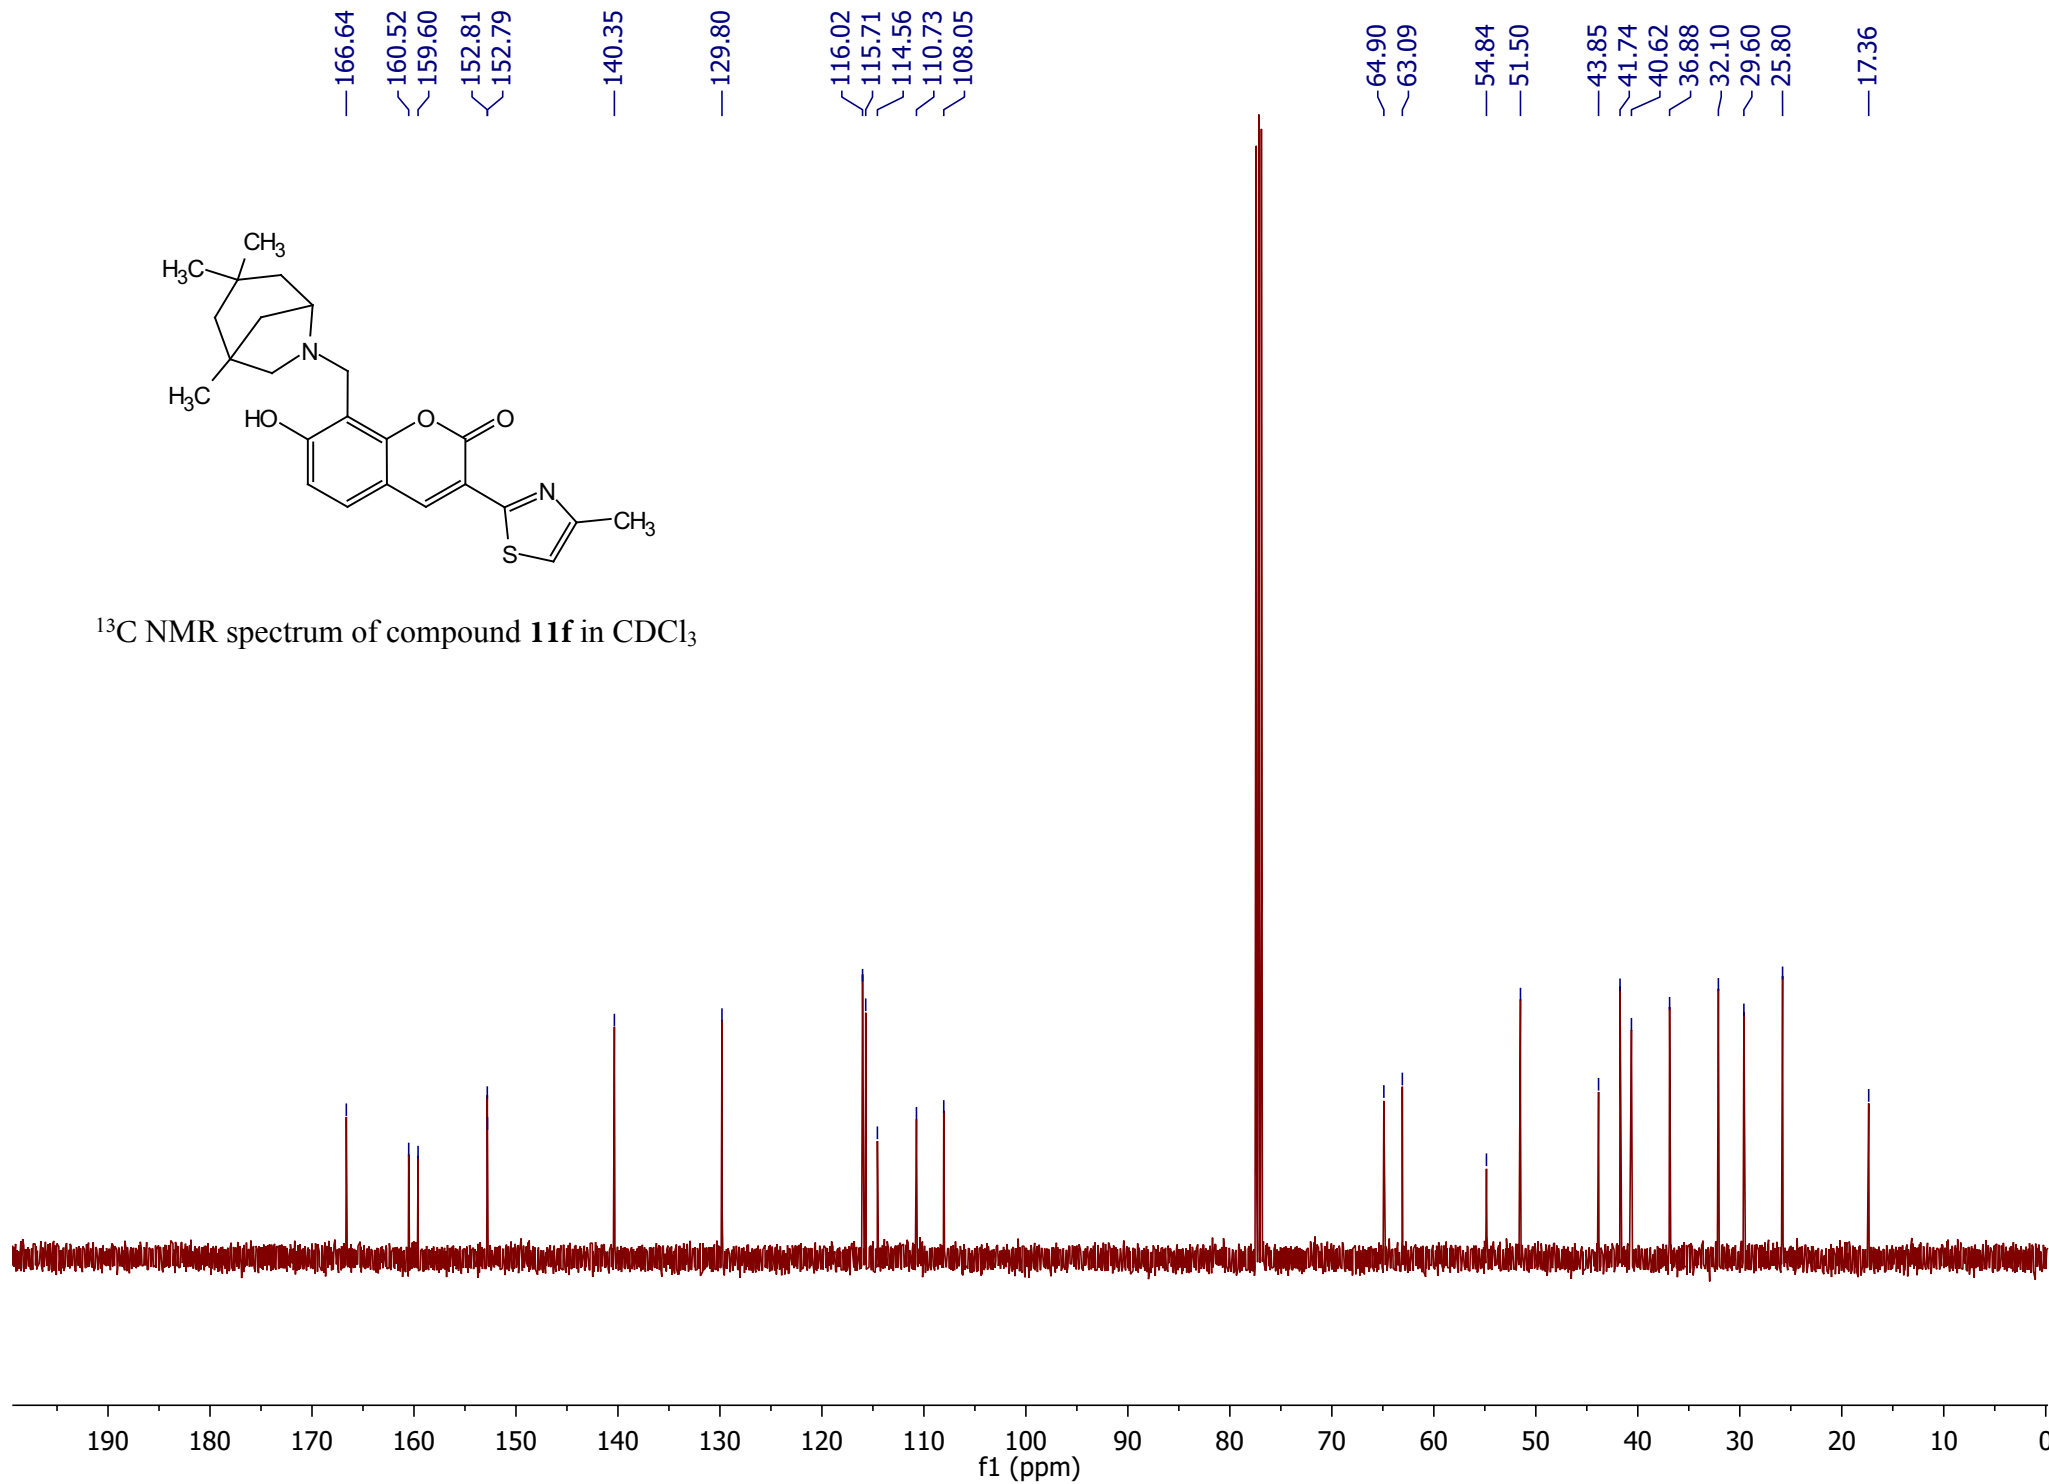

Supplement: s1 [file s1]
